# Supplementary material for: The impact of children’s temperament on recurrent unintentional injuries: the role of paternal parenting styles as a mediator
Source: PeerJ. 2022 Oct 10;10:e14128. doi: 10.7717/peerj.14128 (PMC9559059; doi:10.7717/peerj.14128)
Supplement: Supplemental Information 2 — *p < 0.05, **p < 0.01, ***p < 0.001. [file peerj-10-14128-s002.docx]

|  | Activity | Predictability | Approach | Adaptability | Intensity | Mood | Persistence | Distractibility | Threshold |
| --- | --- | --- | --- | --- | --- | --- | --- | --- | --- |
| Emotional warmth | -0.063** | -0.101*** | -0.120*** | -0.175*** | -0.011 | -0.177*** | -0.146*** | 0.055** | 0.113*** |
| Punishing | 0.153*** | 0.168*** | 0.046* | 0.163*** | 0.099*** | 0.177*** | 0.180*** | 0.041* | -0.009 |
| Over-interference | 0.076*** | 0.072*** | -0.006 | 0.052* | 0.046* | 0.038 | 0.056** | 0.083*** | 0.025 |
| Favoritism | 0.057* | 0.084** | 0.026 | 0.040 | 0.065** | 0.040 | 0.045 | 0.058* | 0.018 |
| Rejection | 0.142*** | 0.147*** | 0.062** | 0.147*** | 0.093*** | 0.165*** | 0.160*** | 0.025 | 0.001 |
| Overprotection | 0.073*** | 0.088*** | 0.041* | 0.087*** | 0.050* | 0.088*** | 0.078*** | 0.058** | 0.011 |
