# Supplementary material for: The impact of children’s temperament on recurrent unintentional injuries: the role of paternal parenting styles as a mediator
Source: PeerJ. 2022 Oct 10;10:e14128. doi: 10.7717/peerj.14128 (PMC9559059; doi:10.7717/peerj.14128)
Supplement: Supplemental Information 3 [file peerj-10-14128-s003.xlsx]

## Sheet: Assignment specification
	factor	explain
	Gender	1	Male
		2	Female
	Recurrent UIs	1	Yes
		0	No
	Gread	4	Gread four
		5	Gread five
	Activity	Measured score
	Predictability	Measured score
	Approach	Measured score
	Adaptability	Measured score
	Intensity	Measured score
	Mood	Measured score
	Persistence	Measured score
	Distractibility	Measured score
	Threshold	Measured score
	Emotional warmth	Measured score
	Punishing	Measured score
	Over-interference	Measured score
	Favoritism	Measured score
	Rejection	Measured score
	Overprotection	Measured score

## Sheet: Data View
NO.	Gender	Grade	Age	Recurrent UIs	Activity	Predictability	Approach	Adaptability	Intensity	Mood	Persistence	Distractibility	Threshold	Emotional warmth	Punishing	Over-interference	Favoritism	Rejection	Overprotection
1	1	4	10	1	3.75	3.45	2.42	2.73	4	3	3.33	4.25	3.7	3.15789		2.6	2.6	2.83333
2	1	4	9	1	3.08	3	4.92	3.36	3.18	3.25	3.42	3	3.7			2.3	1.6	1.66667	3
3	1	4	10	1	2.58	3.36	2.33	3	3.55	2.83	3.33	4.13	3.4	2.21053		2.6		2.83333	2.33333
4	1	4	9	1	3.92	2.91	2.5	2.36	3.18	3.17	2.42	3.5	3	1.78947	2.5	2.7	2	2.5	3
5	2	4	10	1	2.58	2.91	3.33	2.09	3	2.25	1.92	3.38	4.1	3	1.66667	2.4	2.4	1.33333	2
6	1	4	10	1	3.25	4.09	4	3.09	3.73	3.25	3.25	4	3.6			2.3	2
7	1	4	9	1	3.25	3.18	2.08	2.82	2.91	2.75	3.08	4.13	3.1		1.66667	1.7		1.5	1.66667
8	1	4	11	1											1.83333		1.4	2.5	1.83333
9	2	4	9	1	2.33	1.82	2.5	1.91	2.64	1.75	1.58	4.25	3.8	3.26316	1.08333	2.2		1.33333	1.33333
10	2	4	10	1	3.25	2.45	2	2.82	3.91	2.5	3.08	3.88	4	3.10526	1.25	1.3	3.2	1	1.33333
11	2	4	9	1	2.08	3.09	3.33	3.91	2.64	2.83	2.5	3.75	3.1	3.26316	1.08333	2	2.2	1.66667	2.83333
12	1	4	9	1	3.25	3.55	2.83	3	2.36	2.25	2.58	4.13	3.9	3	1.33333	2.5	2.6	1.66667	2.5
13	1	4	10	1	2.67	3.27	3.92	2.82	4.18	3	2.92	3.88	4.7	2.42105	1.41667	1.4	1.4	1.5	2.5
14	1	4	9	1	1.92	2.36	3.42	2.18	2.27	1.92	1.58	4	4.4	2.68421	2	2.6		1.5	2.5
15	1	5	11	1	2.67	3	2.58	2.45	1.64	2.17	1.83	3.88	2.5	3.15789	3	2.9		3.33333
16	1	5	10	1	2	2.82	3.92	2.91	1.91	2.25	2.08	4.38	3.3	2.57895	1.58333	2.1		1.5
17	1	5	10	1	2.5	3.09	2.83	1.64	2.73	2.08	1.33	4.38	4.5	3.21053	1.16667	1.9		1	1.83333
18	2	4	10	1	1.5	2.45	3.33	2.91	2.27	2.83	1.58	3.63	3	3.10526	1.58333		1.8	1	3.5
19	1	4	10	1	2.92	2.55	2.17	2.36	2.91	2.17	2.58	3.63	3.5	3.57895	1.33333	2.9	1.6	1.5	3.5
20	1	4	9	1										3.21053	1.58333	1.9		1	1.83333
21	2	4	10	1											1	1.4	1.2	1	2.33333
22	1	5	11	1														1.5
23	1	5	10	1	4.25	3.36	3.08	2.27	3.55	2.83	3.5	4.88	4.4	2	3.16667	1.7	2	1.83333	1.33333
24	2	5	11	1	1.75	3.45	3.92	2.36	1.55	2.92	2.67	3.75	2.9	1.21053	1.16667	1.3	1	1.83333	1
25	1	4	9	1	3.17	3.36	2.17	2.55	3.82	3.08	2.33	4	3.7	3.47368	1.33333	2	1.8	2	2.5
26	1	4	9	1											3.16667	2.4	2.2	3	2.83333
27	1	4	9	1	2.5	2.73	2.42	2.09	2.64	2.33	2	4.75	4.9	3.26316	1	1.5		1.16667	2.66667
28	1	4	8	1	4.75	3.73	3.5	3	3	3.17	3.25	4.5	3.4	1.94737	3.58333	3.1		2.5	4
29	1	4	9	1	2.5	2.27	3.33	1.64	3.55	2.08	2.5	4.63	3.9	3.26316	1.16667	1.8		1.16667	1.5
30	1	4	10	1	3.92	3.36	3	2.73	3.55	3.42	3.25	4.38	3.6	3.36842	1.08333	1.3	2.6	1.5	2
31	1	4	9	1	2.67	2.82	3.33	1.82	2.45	1.75	2.08	3.75	3.9	3.36842	2	3.1	1.6	2.5	3.5
32	1	4	9	1	2.17	3.18	3.25	2.09	2.55	2.83	2.25	3.63	3.4	2.68421	2.08333		2.4	1.66667	2
33	1	4	8	1	2.83	3.27	4.33	2.64	3.45	3.33	4.42	3	2.3	1.42105	1.91667	1.5	1.2	1.83333	2
34	1	4	9	1	4.17	4	3.08	3.55	4.09	3.33	3.33	4.13	3.6	2.57895	1.75			2.16667	2
35	2	4	9	1	1.83	2.73	3.92	3	2.18	2.58	2.25	4.5	4.7	3.73684	1.5	2.9	2	1.33333	2.33333
36	1	4	9	1	3.58	3.27	3.75	2.64	4.27	3.5	3.5	4	2.7	2.15789	3.08333	2.6	2.6	1.83333	2.5
37	1	4	9	1	3.25	3.73	3.67	3.55	3.18	2.83	2.75	3.63	3.4		1.5	2.3	2		2.5
38	1	4	9	1	3.5	3.45	3.17	3.73	3.36	3.42	3.92	3.25	2.9		2.08333	2.7		2	3.16667
39	1	4	9	1	3.42	2.82	1.83	2.55	2	3.08	2.92	4.13	2.3	2.63158		2.2	2	2.33333	2.33333
40	2	4	9	1	4.25	3.18	3.17	3.27	3.64	3.33	4.17	4.13	3.6	2.52632	1.58333	2.7	2.2		1.66667
41	2	4	9	1	2	3.09	2.92	1.82	4.64	1.92	2.17	3.75	3.9		2.5	3.2		1.83333	2.33333
42	2	4	9	1	2.67	3.18	3.25	2.55	4	2.25	2.92	3.63	3.1	2.68421	2.41667	2.4	2.2	2.16667	3
43	2	4	9	1	2.83	2.82	4.17	3	4.27	3.67	2.42	3.75	4.5	3.15789	1.16667	2.4		1.83333	2.16667
44	1	4	9	1	3.5	4.45	2.5	3.82	3.36	3.83	4.42	4.5	4.3	2.15789	2.5	2.4		2.16667	1.66667
45	1	4	9	1	3.5	3.27	3.17	3.55	3.64	3.67	3.25	4.38	3.5		3	2.5	1.4	2.83333
46	1	4	10	1	2.08	3	3.33	3.09	2.45	3.17	2.58	4.5	3.8	3.31579	1.33333	2.7	2.8	1.33333	2.33333
47	1	5	9	1	3.83	4	3.08	3.18	4.36	3.08	3.25	4	3.7	2.47368	1.91667	2	2.6	1.83333	2.83333
48	1	5	10	1	3.67	2.73	3.5	4.09	2.91	4.33	4.17	3.88	3	2.36842	2.41667	2.6	2.4	2.66667	3
49	1	4	9	1	2.83	2.91	3.5	3.64	2.45	3.17	3.5	3	2.4	2.52632	1.66667	1.8	1.8	1.83333	2.33333
50	1	4	9	1	3.5	4	3.17	2.73	3	2.92	3.42	3.63	2.7	3.63158	1.33333	2.3	2.6	1.33333	2.33333
51	1	4	8	1	4.75	3.82	3.17	4.18	4.09	3.92	4.58	4.75	3.3	2.47368	2.5		2	2.33333	2.33333
52	1	4	9	1	3.5	3.82	3.92	3.73	2.91	4	3.75	3.38	3.7	3.05263			2.2	1.5	3
53	1	4	9	1	3.08	2.82	3.08	2.91	4	2.67	2.33	4.13	4.3	2.73684	1.58333	1.9		2.33333	2
54	2	4	9	1	2.92	3.55	4	4.18	2.82	3.25	3.17	3.63	2.8	3	1.91667	2.1	1	1.66667	2.66667
55	1	4	9	1										3.10526	1.83333	2.3		1.5	3.16667
56	2	4	9	1	3.25	2.91	2	2.18	4.73	1.5	1.67	4.38	3.8	2.36842			2	1.83333	2.5
57	2	4	9	1	4.25	3.55	1.75	2.36	4	2.92	3.25	3.13	4.1	2.26316	1.83333			1.5	1.83333
58	1	5	10	1	3.25	3.09	3.58	3.82	3.82	3.67	3.33	3.38	3.3	2.73684	1.25	1.7	1.8	1.5	2.16667
59	1	5	9	1										2.10526	1.33333	1.9	1.6	1.16667	2.16667
60	1	5	10	1	2.08	2.73	2.42	2	2.55	2	2.58	4.38	3	2.47368	3	2.3		3.16667	3
61	1	5	10	1	4.5	3.09	3.25	3.09	3	3.42	3.5	3.25	1.6	2.26316	3	2.6	3.2	3.5	2.66667
62	1	5	10	1	3.75	3.45	4.58	3.45	4.55	3.08	4.33	3.5	4.5	2.47368	2.83333	2.1	2.6	3	4
63	1	5	11	1	3.17	2.36	2.92	2.82	2.82	2.42	3.67	4.63	3.5	1.84211	2.5	2.1	1.8	2	2.16667
64	1	5	10	1	3.17	3.18	2.25	2.27	2.64	4.08	2.75	3.75	4	1.63158	2.25	2.1		2.83333	3
65	1	5	11	1	2.08	2.18	3.17	2.09	1.36	2.08	1.67	4.88	3.5	3.31579	1.33333	2.1	2	1.16667	1.66667
66	1	5	10	1	3.25	3.27	3.83	2.36	3.09	2.67	3.42	3.5	3.8	2	2.33333	1.6	1.8	2.5	2
67	1	5	12	1	2.75	3.64	3.33	4.36	1.91	4	3	3	1.7	3.15789			2.4	1.16667	2.66667
68	2	5	11	1	3.17	3.27	3.33	3	2.64	3.5	3.42	3.63	3.1
69	2	4	10	1	2.83	2.91	2.75	2.82	2.91	2.33	2.33	3.75	3.4	2.94737	2.33333	3	3.4	2	3.16667
70	2	4	9	1	3.08	3.36	3.67	3.91	4	2.83	2.5	4.88	2.6	2.57895	1.58333	2.3	2.4	1.33333	2.5
71	1	5	10	1	2.33	3.45	3.83	3.55	3.27	3	2.58	3.5	3	3	1.75	2.4		2	2.66667
72	1	4	9	1	2.92	3.36	3.58	3.09	3.36	3.08	3.58	4.25	2.8	3.10526	1.41667			1.16667	2.5
73	1	4	9	1	4.42	3.91	3.33	3.73	3.91	3	3.67	4.5	4.5	3.63158	1.16667	2.6		1.33333	2.33333
74	1	4	9	1	4.42	3.45	3	3.55	3	3.67	3.5	3.63	3.8				1.8	2	1.66667
75	1	4	9	1	3.33	3.18	3.42	3.64	4	3.42	3.08	4	4.4					2	3
76	1	4	10	1	3.5	3.18	3.67	3.45	2.73	3.75	3.58	3	2.5	2.52632		2.5	1.6	2.66667	2.16667
77	2	4	9	1	2.58	2.55	4	2.55	2.64	2.67	2.75	2.88	3.5	2.10526				1.83333	2.33333
78	2	4	9	1	2.33	3.09	3.17	2.64	3.73	2.83	3.25	4.38	3.9	3	1.91667	2.6	2.8	1.33333	2
79	1	5	10	1	2	3.18	4.58	3.18	1.36	3	1.25	3.75	4.1	2.84211	1.25	2	1.4	1.16667	2
80	1	5	10	1	4	3.09	2.25	2.45	4.82	3.42	2.25	5.38	3.9	2.68421	2.75	2.6
81	1	5	9	1											3.08333	3.6		2.33333	3.66667
82	1	5	11	1	3.58	3.82	2.83	3.45	3.09	3.75	3.25	2.75	3.5	1.89474	1.91667	1.7	2.2	1.83333	2.16667
83	1	5	10	1	3.42	3.36	3.25	3.73	3	3.33	3.83	3	2.6	1.78947	2.41667			2.16667	3.16667
84	1	5	11	1	3.08	3.45	3.5	3	3.27	3.42	3.25	3.75	3.8					1.83333	1.66667
85	1	5	10	1	2.25	2.73	2.25	1.82	3	3	1.42	3.5	3.8
86	1	5	10	1	3.75	3	3.17	2.82	3.55	3.17	3	3.75	3.1	2.63158	1.75	2	2.2	2.66667	2.33333
87	2	5	10	1	2.42	2.64	4.67	2.82	2.73	3.17	2.58	4.13	4.4				1.6	1.5	2.33333
88	1	4	8	1	4.5	4.27	2.08	3.45	4.55	3.08	2.67	4.75	4.3	2.68421	2	2.3	4	1.33333	2.83333
89	1	4	9	1	3.33	3.55	3.67	3	2.91	3.17	4.17	3.5	2.1	2.10526	2.41667	2.5	2.8	1.33333	2.16667
90	1	4	9	1	3.25	3.55	3.75	3.18	3.73	2.92	3.83	3.63	3.9	1.84211	2.5	2.1	1.6	1.5	1.83333
91	2	4	8	1	3.33	3.45	3.83	2.91	3.91	3.42	3.67	4.5	3	3.31579			3.4	2
92	1	5	11	1	2.83	3.55	3.92	3.64	2.82	3.42	3	3.13	3.6	1.78947	2.16667	2.6		2	1.5
93	1	4	9	1	2.08	2.27	2.67	2.09	1.73	2.08	2.42	3.88	2.9	2.84211		2.6		2.16667	3
94	2	4	9	1	2.83	3.73	3.42	3.91	2.91	3.83	4.42	4.63	3.5	4	2.83333	3.7	4	3	3.5
95	2	4	9	1	3.92	3.27	2.42	2.45	2.64	2.25	3	4.13	4.7	3.36842	2.41667	3		3.33333	2.5
96	1	5	10	1	3.17	3	3.83	3.45	3.18	3.67	3.25	4.25	3.2	1.31579	1.41667	1.4	1	1.16667	2.16667
97	2	4	9	1	3.08	3.27	2.75	2.82	2.73	2.67	2.67	3.75	3.7	3.47368	1			1.16667	1.66667
98	2	4	9	1	3.58	3.45	3.75	3.18	4.18	4	3.58	4.63	4.2	2.05263	1.66667	1.4	2.4	1.33333	1.66667
99	1	4	11	1	3.92	4.27	2.5	3.09	4.09	3.08	3.67	5.13	4.4	2.21053	2.08333	2.1	1	2.83333	2.66667
100	2	4	10	1	2.92	3.73	3.25	3.55	3.36	2.67	3.83	3.38	2.9	2.36842	2.5	3	2.6	1.83333	3
101	1	4	9	1	4.08	3.55	3.5	3.18	4.09	3.33	3.5	4.38	3.2	2.15789	1.41667	1.6		1.66667	1.66667
102	1	4	10	1	4.33	3.36	3.5	2.27	3.64	2.33	3.08	4.63	4.2	2.94737	1.58333	1.8	1.6	1.66667	2.33333
103	1	4	9	1	3.33	3.18	2.5	2.64	4.36	3	2.67	4.88	4.2	3.21053		2.5		1.33333	1.5
104	1	4	10	1	3.17	3	3.08	2.91	4	2.92	2.83	4.38	4.2	2.05263	1.91667	2.5		1.83333	1.83333
105	2	4	9	1	3.42	3.27	4.08	4	3.36	3.17	3.08	2.5	2.4	3.10526	1.83333	2.4	3.4	2.33333	2.16667
106	1	4	9	1	3.42	3.45	3.17	2.27	3.64	2.42	3.75	4.25	3.8	3.10526	1.08333	2		1.16667	1.66667
107	1	4	9	1	2.92	3.27	2.67	2.73	3.36	2.83	3.17	4.5	3.8	2.63158	1.58333		2	1	2.16667
108	1	5	10	1	3.83	2.91	3.33	3.18	4.27	3.17	3.25	4.63	3.7	2.47368	1.08333	1.4		1.5
109	1	5	10	1	2.58	2.64	2.83	1.18	2	2.17	1.58	3.38	2.7	3.36842	1.33333	2.5		1.5	3
110	1	4	9	0	2.5	3.73	3.83	3.64	3.45	2.83	2.33	4.13	4.9	3.05263	1.58333	2.5		1.66667	3.33333
111	1	4	10	0	2.42	2.64	3.42	3.18	2.45	2.75	1.67	4.63	3.7	2	1.33333	1.8		1.33333	1.5
112	1	4	9	0	3.33	3.36	4.25	2.91	4.91	3.17	3.33	3.75	3.3	3.10526	1	2.2	3	1.16667	3.16667
113	1	4	9	0	3.08	3.27	4.08	3.45	3.18	3.33	3.17	3.63	4.7	3.36842	1	2.9		1.5	3.16667
114	1	4	9	0	4.42	3	3.08	3.09	3.73	3.08	3.67	5.13	3.5				2.6	2	2.33333
115	1	4	9	0	1.55	2.36	2.5	1.36	3	1.83	1.83	3.63	3.9	3.10526		2		1.5	2.16667
116	1	4	10	0	4	3.36	2.92	3	4.64	3.25	3.67	5.38	3.6
117	1	4	9	0	3.33	3.73	4.25	3	2.18	3.33	3.58	5.25	2.4		1.16667	1.5		1.33333	1.5
118	1	4	9	0	3.83	3.73	3.33	3.18	3.73	3.25	3.33	3.38	2.6		2.5	2.5	1.2	2.5	3
119	1	4	10	0	4.33	3.27	2.58	2.82	4.36	2.67	3.25	3.38	4		1.41667	2.7	1.6	1.83333	3.16667
120	1	4	10	0	2.58	2.27	3.58	3.09	2.55	3.67	2.75	2.25	2.9	2.68421		2.1	3.8	1.66667	3.5
121	1	4	10	0	3.67	3.73	3.58	3.55	4.18	3.17	2.58	4.38	4.9	1.78947	2.5	1.9		2.16667	2.5
122	1	4	8	0	2.67	3.36	4	4.45	4	3.08	3.5	3	3.5	3.63158	1.08333			1	2.33333
123	1	4	11	0	2.33	3	3.83	2.91	2.27	3.08	2.75	3	2.9
124	1	4	11	0	3.5	3.27	3.5	3.36	3.27	2.75	2.5	4	4.7	2.31579	2.33333	1.9	3.8	2.16667	2.33333
125	1	4	9	0										2.94737	1.41667	1.7	2		1.83333
126	1	4	9	0	3.25	3.64	3.42	2.55	3.64	3	3.58	3.75	4.2	3.52632	1.08333	1.8		1.5	2.16667
127	1	4	10	0	3.75	3.91	3.58	3	3	3.25	4.25	2.88	2.9	2.63158	2.75	2.5	1	2.66667	2.66667
128	1	4	9	0	2.83	3.45	4	3	2.82	4.17	2.75	2.75	3.9	2.94737		2.4	1.8	2.33333	2.66667
129	1	4	9	0										3		1.3		1.16667	1.5
130	2	4	10	0	2.58	2.27	2.42	1.82	2.91	1.83	2.25	4.5	3.8	3.63158	1.08333	2.4		1.16667	1.16667
131	2	4	9	0	3.75	3.18	3.42	3.91	3.18	3.75	3.58	3.63	3.4		1.33333	1.6	1	1.16667	2
132	2	4	10	0	1.92	2.45	3.25	2.73	2	2.25	1.83	3.5	3.1	2.31579	1.08333	1.3	1.6	1	2
133	2	4	9	0	2.83	4.27	2	2.73	2.64	2.42	3.92	3.5	2.7	3.52632	1.41667	1.4	2.4	1.16667	1.5
134	2	4	9	0	3	1.82	3.25	1.91	4.18	1.83	1.83	3.75	4.5
135	2	4	10	0	2.67	2.73	4.17	2.64	2.82	2.67	3.25	4.25	4.4	2.42105	1.33333	2	1.8	1.66667	2.16667
136	2	4	9	0	2.5	3.73	4.17	3.18	1.82	4.17	2.17	4.38	2.6	2.68421	1	1.7	3.4	1.5	2.5
137	2	4	10	0	3.33	3.09	2.92	3.09	1.82	2.67	2.33	5	2.3	2.63158					2.33333
138	2	4	9	0	2.67	2.36	3	3.09	3.82	2.25	2.08	3.25	2.4	2.94737	1.25	1.7	2	1.33333	2.33333
139	2	4	9	0	3.33	3.09	4.25	4.18	3.82	3.33	2.75	2.88	3.8	2.05263	2.5	2.8	1.8	2.66667	3.5
140	2	4	9	0	1.83	2.91	4.08	2.64	2.64	2.5	3.08	3.25	3.9	2.94737	1.08333	1.3		1	1.5
141	2	4	10	0	2	2.18	2.75	1.91	2.09	2.25	1.83	3	3.3	2.68421	1.16667	1.7	2	1	1.83333
142	2	4	9	0	3.58	3.27	2.58	3.27	1.91	2.25	1	2.38	3.5	3.36842	1.41667	1.9	1	1.5	3.33333
143	2	4	9	0	3.5	3.36	2.5	2.73	3.36	2.92	2.75	5.13	5.1		1.91667	1.7	2	1.33333	1.66667
144	2	4	9	0	2.17	2.82	2.83	2.82	3.73	3.5	2.58	3.63	4.6	3.21053	1.16667	2	1.8	1.33333	1.83333
145	1	4	9	0	3	3.64	3	3.09	2.64	2.75	2.42	3.5	4.1	2	1.66667	2.1		1.33333	1.83333
146	1	4	9	0	3	3.27	3.08	2.91	3.64	3	3.5	3.5	3.6		1.08333			1.5
147	1	4	9	0	3.83	3.18	3.17	3.18	3.45	3.5	2.83	4.38	4.3	3.47368	1.41667	2.6	1	1.16667	3
148	1	4	10	0	2.42	2.55	3.5	1.91	3.18	2.25	1.75	4.88	3.4	3.21053	1.75	2.6		2.5	3.16667
149	1	4	9	0	3.5	3.18	3	3.18	3.55	2.5	2.58	4.5	4.1	2.89474	2.16667	2.4	1.4	2.16667	3
150	1	4	9	0	2.92	2.73	2.92	2.64	4.36	2.75	2.67	4.38	4.6	2.05263	1.83333	1.6		1.33333	1.5
151	1	4	10	0	3.42	3.45	4.33	2.91	3.36	3.83	2.58	4	4	2.89474	1.08333	1.7		1	2.5
152	1	4	9	0	3.17	3.64	3.5	2.73	3.64	2.75	3.08	4.5	3.8	3.36842	1.16667	1.8	2.4	2	2.66667
153	1	4	10	0	2.75	3.27	3.08	3.27	3.45	3.17	3.42	4.38	3.7		1.25		1.8	1	1.83333
154	1	4	10	0	3.08	2.55	3.58	3.18	3.45	3.08	2.58	4.25	3.5	3.42105	1.16667	2.7		1.5	3.33333
155	1	4	10	0	3.75	3.73	2.33	3.09	4.64	3	4.17	4.88	3.4	2.42105	1.41667	2.2	1.4	1.66667	2.83333
156	1	4	9	0	2.67	3.27	3.83	3.18	2.36	2.5	2.5	4	3.3	2.52632	2.25		3.2	2.83333	2.5
157	1	4	10	0	2.58	2.36	2.75	2.36	3.36	2.25	1.92	4.38	3.9	3.68421	1.16667	2		1	1.66667
158	1	4	9	0	3	2.82	2.08	2.27	3	2.17	2.17	2.75	3.3	2.94737	1.75			2.16667	1.83333
159	1	4	9	0	2.58	3.36	2.83	2.64	2.45	2.58	1.58	4.75	3.2
160	1	4	10	0	2.33	3.45	3.33	2.36	2.64	1.92	2.33	3.88	4.9	3.47368	1.16667	2.4		1.16667	1.83333
161	1	4	10	0	3.58	2.73	4.92	3.45	4.82	2.92	2.5	4.5	4.7	2	1.5	1.7	1.6	1.33333	1.5
162	1	4	10	0	2	2.55	3.83	3.36	1.91	3.5	3.25	3.25	2.5	3.52632	1.08333	2.6	3.2	1.16667	3.33333
163	1	4	10	0										3	1.66667	2	2.4	1.5	2.16667
164	2	4	9	0	1.83	3.45	2.92	3.18	3.45	3.33	3	4.75	3.6	2.57895	1.33333	1.7		1.33333	2
165	2	4	9	0	2.75	2.64	2	1.73	3.36	2.83	3.33	4.25	4.9	2.94737	1.25	1.4		1.66667	2
166	2	4	9	0	3.75	3.18	3.42	3.55	5	2.75	2.17	2.75	4.7	3.42105	1.08333	1.7		1	1.83333
167	2	4	9	0	1.83	3.09	2.5	3.27	2.09	2.5	2.5	2.75	3.1	3.42105	1.83333	2		1.33333	3.16667
168	2	4	9	0	3.5	2.27	3	2.09	3.45	2.33	1.67	3.13	2.8	2.63158	1.5	1.8	1	1.66667	1.66667
169	2	4	10	0	2.83	2.82	3.58	2.91	3.27	2.83	2.58	4.75	3.8	3.21053	1.33333	2.7		1.5	2.5
170	2	4	9	0	1.83	2.82	4.5	3.55	3.64	3.58	2.92	2.88	3.4	3.26316	1.5	2.5	2.6	2	2.66667
171	2	4	10	0	2.42	2.73	3.08	2.18	2.91	2.33	2.5	4	2.9	3.47368	1.33333	2.4		1.33333	2.33333
172	2	4	9	0	2	3.27	3.5	3.73	2.09	3	2.75	2.63	2.2	2.26316	1.5	1.9	1.4	1.83333	2
173	2	4	10	0	2.17	2	2.58	1.91	3.36	2.33	1.67	2.88	3.6	3.10526	2.25	2.2		1.33333	1.66667
174	2	4	10	0	2.25	3.18	3.42	3.36	2.82	2.83	2.17	4.25	3.2	2.94737	1.5	2.2	3	1.5	2.66667
175	2	4	9	0	3.5	2.55	4.17	3.09	3.36	2.75	4.08	4.63	3.5	2.52632	1.25	1.4		1.33333	2.66667
176	2	4	10	0	3.5	4	3.67	3.18	4	3.58	4.17	3.63	4.1	2.31579	1.25	1.7			2
177	2	4	9	0	2.75	3	4.42	3.18	4.45	3.25	2.92	4.75	4.6	2.52632	2.33333	2.2	2.6	2.5	2.33333
178	2	4	9	0	3.58	3.64	3.58	3.45	3.36	3.08	3.25	3.63	3.1	2.21053	1.25	1.7		1	1.83333
179	2	4	9	0	2.42	3.82	4.83	4.09	1.73	4.17	3.33	3	2.5	2.89474	1.16667			1.5
180	2	4	10	0	2.17	2.91	5.08	2	1.91	2.58	1.67	4.38	5.4	2.42105	1.58333	2.1	2	1.16667	2.16667
181	2	4	9	0	2.5	2.73	3.17	2.45	2.82	3.5	2.5	3.88	3.7	2.42105	1.16667	1.5		1	1.83333
182	2	4	10	0	1.5	2.45	3.75	2.45	2.64	2.33	1.42	2.5	3.1	3.36842	1.08333	2		2	1.83333
183	2	4	9	0	2.67	2.82	4.75	3.73	4.18	4.17	3.83	4.63	3.1	3.21053	2.33333	2.9		2.33333	2.16667
184	2	4	9	0	3.33	3.64	3.5	3.36	3.73	3.17	2.58	4.25	3.6	2.15789	2.08333	2	2.6	2.83333
185	2	4	9	0	2.92	3.18	3.5	3	3.64	2.58	3.17	3.75	3.7	2.15789		1.2	2.4	1.33333	1.5
186	2	4	10	0	1.67	2.64	3.5	3.45	1.36	2.25	1.92	3.38	2.7	2.73684	2.5	2.7		2.33333	2.66667
187	2	4	10	0	1.92	2.36	2.83	2.91	3	3	2.58	4.88	3.7	2.05263	3.08333			2	3
188	2	4	9	0	3.58	3.55	3.25	3.18	4.09	3.17	3.08	4.63	3.8			1.7		2	2.16667
189	2	4	10	0	5.58	3.55	3.5	3.27	4.64	2.5	2.67	6	5	3.42105	1.16667	2.4		1.66667	2.66667
190	2	4	10	0	2.75	3	4.33	3.09	3.73	3.08	2.75	4.25	3.5		1.25			1.33333	2.33333
191	1	4	10	0	4.17	3.82	4.83	4.27	5	4	4	5.63	3.7	2.63158	2.41667	2.2		2.5
192	1	4	9	0	1.75	2.45	2.75	2.36	2.36	2.08	2	1.75	4.3	3.21053	1.08333	1.8		1	1.83333
193	1	4	9	0	3.75	3.09	2.92	3.55	3.73	3.33	3.5	3.63	3.5		1.5	3		2.5	3
194	1	4	9	0	4.58	3.73	4.33	4.09	3.82	3.42	3.92	3.5	3.6	1.78947	1.83333		1.8	1.66667
195	1	4	10	0	3.08	3.64	2.67	3	2.82	2.67	3.17	4.13	3.9					1.83333	2.5
196	1	4	10	0	2.58	2.36	3.17	3	2.55	1.92	2.5	3.75	3.5		1	1.3		1	1.33333
197	1	4	9	0	3.75	2.55	4.33	2.91	3.36	2.5	1.42	4.75	2.9	2.73684	2.16667	2.5	2.4	1.33333	2.66667
198	1	4	10	0	4.67	4.18	2.67	3.18	4.36	3.83	4.17	4.75	3.8
199	1	4	10	0	2.42	3	3.08	3.91	2.64	3.17	2.67	4.13	2.1		1.41667	2		2	2.33333
200	1	4	10	0	3.42	3.09	4.67	2.36	2.64	3.58	3.42	3.88	4.4	2.42105	1.91667	2.1	2	2.16667	2.5
201	1	4	9	0	2.42	3.36	3.33	2.91	2.09	2.92	3	3.5	2	2.47368	1.16667	1.5	2	1	1.83333
202	1	4	10	0	3.08	3.82	3.08	4.18	3.18	3.75	3.5	3.38	3.7				2.6	2.16667	3.16667
203	1	4	10	0	3.92	3.27	3.92	4.36	2.82	3.33	3.08	5.13	2.6		1.25	2.1		1.16667	2.5
204	1	4	9	0	2.33	2.73	3.17	2.36	1.91	2.42	1.92	3.75	3.9	3.57895	1			2	1.83333
205	1	4	10	0	4	3.82	1.42	3.55	2.91	3.83	3.17	5	1.8	3	1.25	1.9	3	1	2.16667
206	1	4	10	0	3.75	3	3.08	2.55	4.55	2.67	3	4.13	4.2		1.08333	1.5		1.16667	1.5
207	1	4	10	0	3.75	4.09	3.17	3.36	3.45	3.17	3.42	3.25	3.5		3.16667	1.7	1.4	3.16667
208	1	4	9	0											1.33333	3		1	3.33333
209	1	4	11	0										3.26316	1.58333	2.8		1.33333	1.66667
210	1	4	9	0										2.31579	1.58333	2		1.83333	2.66667
211	2	4	10	0	2.75	3.18	3.42	2.91	2.45	2.75	2.92	4	2.7	3	1.08333	1.7	1.2	1	1.5
212	2	4	9	0	3.17	3.09	3.67	3.27	3.64	3.17	2.83	4.13	3.8		1.08333	1.7	2.2	1
213	2	4	10	0	2.83	2.36	2.58	2.36	2.82	1.83	2.83	4.38	4.7	3.05263	1.25	1.5	2.6	1.33333	2
214	2	4	9	0	2.92	3.18	3.25	3.18	4	2.92	3	4.5	3.9	1.78947	1.25	1.6		1.5	1.66667
215	2	4	9	0	2.5	2.91	4.83	2.73	3.27	2.33	3	3.25	4.1		1.08333	2.4		1.5	2
216	2	4	9	0	2.75	2.27	3	2.55	1.64	2.58	2.33	3.38	3	2.52632	1.5	1.9	2	1.83333	2.33333
217	2	4	10	0	3.58	3.09	3.17	2.45	3.64	3.5	2.5	3.75	3.6	2.73684	1.08333	1.6		1.5	1.5
218	2	4	9	0	2.67	3.91	2.25	3	4.09	3.83	3.58	3.75	1.7	1.36842	1			1.16667
219	2	4	10	0										3.36842	1	1.7		1	1.5
220	2	4	10	0	3.42	3.36	3.92	3.55	2.64	3.33	3.25	3	3.4	2.36842		1	2	1.66667	1.5
221	2	4	9	0	3.58	3.18	3.75	4.45	3.45	4.67	3.17	2.63	3	2.31579		1.7	2.4	1.66667	2.5
222	2	4	9	0	3.5	2.82	3.58	3.82	4.55	3.5	3.42	2.88	3.3		1.25	2.1		1.16667	2.33333
223	2	4	10	0	2.33	2.91	2.92	2.18	2.64	1.75	2.58	4.13	3.7		1.08333	1.8		1	1.83333
224	2	4	9	0	3.08	3.36	4.33	3.45	2.64	3.08	2.67	4.13	3.5	3.05263	1.16667	1.5	2.4	1.16667	1.83333
225	2	4	10	0	2.42	3.27	2.75	2.36	2.09	2.42	2.75	3.38	2.7	3.21053	1.16667	2		1.33333	3
226	2	4	10	0	2.25	3.27	3.92	3.55	3.27	3.42	3.17	4.88	3.8			1.8	2.6	1	3.33333
227	2	4	10	0	3.92	3.64	4	3	2.36	3.83	3.17	4.25	3.4	2.21053	1	1.4	1	1.16667	1.16667
228	2	4	10	0	2	2.82	2.92	2.64	3	2.83	2.08	3.38	2.7	2.21053	2	2.6		1.33333	2
229	2	4	9	0											1.33333				2
230	2	4	9	0										2.68421	1.16667	1.3		1.16667	1.5
231	2	4	9	0
232	1	4	10	0	4.42	4.27	3.75	3.73	3.82	3.75	4.67	3.75	3.2		1.41667	1.3	2.6	1.16667	2.33333
233	1	4	11	0	3	3.91	3.17	3.09	3.45	3.42	3.67	3.75	3.6
234	1	4	9	0	2.33	3.18	3	3.18	1.73	3.33	2.25	4.13	2.1	2.57895	1.08333	1.4	1.6	1	2
235	1	4	10	0	1.92	2.36	3.58	3.91	3.45	2.75	3.42	4	2.5	3.63158	1.08333	2.7	2.8	1.83333	3
236	1	4	9	0										2.63158	1.83333	3.4	2.2	2	2.5
237	1	4	9	0	3.08	2.36	4	2.73	1.73	3.5	2.83	3.13	1.7	2.94737	1.5	2.2	1.6	1.16667	2
238	1	4	10	0	2.25	2.45	3.5	3.73	1.45	3.42	2.5	4.13	1	1.94737	1.75	1.6	1.4	1.33333	1.5
239	1	4	10	0	2	2.64	3.5	2.27	2.73	2.42	1.92	3.88	4.6	3.26316	1.58333	2.3	2	1.83333	2.33333
240	1	4	9	0	2.75	2.45	3.08	2.27	2.36	2.67	2.83	3.63	3.5	3.05263	1.16667	2.3	2.2	1.16667	2.5
241	1	4	9	0	2.42	2.45	3.75	2.55	3.18	2.58	2.08	4.75	3.3	2.68421	2	2.2	1.2	1.33333	2.66667
242	1	4	9	0	3.83	3.91	3.33	2.64	3.91	2.83	3.08	3.75	3.9	3.63158	1.41667	1.7	1.8	1.5	1.83333
243	1	4	10	0	3.33	3.73	3.42	3.27	3	3.58	3.17	3.25	3.1	3.84211	3.33333		3.2	4	3.16667
244	1	4	9	0	2.67	2	4.17	2.82	2.82	2.42	2.33	4	2.9	2.89474	1.16667	2.1	1.8		1.83333
245	2	4	9	0	3.25	3.36	3.5	4	2.27	3	3	3.13	1.8	2.26316	1.08333	1.3	2
246	2	4	9	0	3.17	3.09	3.17	4.27	2.36	3.67	3.42	1.88	1.2	2.26316	1.08333	1.3	1.8	1	1.5
247	2	4	9	0
248	2	4	10	0	1.75	2.73	3.75	2.27	2.45	2.08	2.67	4.88	4.5	2.89474	1.75	2.4		1.16667	2.83333
249	2	4	10	0	2.33	2.55	3.25	3.55	2.91	2.25	2.67	4.13	3.1
250	2	4	10	0	2.08	1.91	4.33	3.18	3	2.25	1.83	4.63	2.8	2.84211	1.08333	1.7	1.2	1.16667	1.66667
251	2	4	10	0	3.67	3.64	2.92	3.45	4.09	3.33	3.58	4	4.5		1.5	2.6	2.8		3.16667
252	2	4	9	0	3.83	3.64	3.58	3.64	3.82	3.33	3	4.13	4.6	3.36842	1.33333	2.6	2		2.83333
253	2	4	9	0	3.08	3.55	3.17	4.18	3.36	2.58	2.92	4	3.3	1.94737			1.8	1.16667
254	2	4	10	0	1.83	2.27	2.75	3.73	1.73	3.08	2.5	2.88	1.3	2.05263	1.08333	1.3	1.4	1.33333	1.33333
255	2	4	9	0	1.17	3	3.5	1.45	1.18	3.08	1.75	2.88	3.9	2.73684	1.83333	2.4	1.4	2	2.83333
256	1	5	10	0	2.83	3	2.5	3	3.82	2.67	3.17	4.13	4.2	3	1.33333	2.1	1	1	2.33333
257	1	5	10	0	2.42	2.82	3.33	2.82	3.91	3.17	2.5	4	3.9	2.63158	1.25	1.4	1.8	1.16667	2.66667
258	1	5	11	0	2.33	2.55	3.33	2.64	1.64	2.75	2.58	3.25	2.6	2.36842	1	1.6	1.6	1	1.66667
259	1	5	10	0	2.83	3.55	3.17	2.73	3.09	3.58	3.92	3.13	3.1	1.47368	1.66667	1.7		1.5	1.33333
260	1	5	10	0	2.83	3.45	2.92	2.64	3.18	2.25	2.5	4.13	3.7	3.26316	1.08333	2	3	1	1.5
261	1	5	11	0	3.67	3.82	3.25	2.91	3.55	3.75	4.25	4.75	3.9	2.73684	2.58333			1.33333	3.33333
262	1	5	10	0	2.83	3.18	2.83	3.55	2.64	2.83	3.42	4	3
263	1	5	9	0	3.25	3.55	3.17	3.27	3.64	3.67	3.58	3.75	3	3.57895	1	1.9	2.8	1	2.5
264	1	5	11	0	4.33	4.09	3.58	4	3.82	3.75	2.67	4.63	3	2.94737	1.16667	2.2	3	1.66667	2
265	1	5	9	0	4.67	4	2.83	4.09	3	3.25	4.08	3.5	3.1
266	1	5	11	0	3	3.45	3	3.45	3.55	3.5	3.25	4.63	4		1.58333	2.4		1.66667	2
267	1	5	10	0										2.52632	1.5	2.4		1.5	2.33333
268	1	5	12	0														2.5	2.83333
269	1	5	10	0										2.47368	2.16667	1.9	2	1.5	1.33333
270	2	5	10	0	3.67	3.64	3.5	3.18	3.55	2.75	3.08	2.88	3.4	2.68421	1.08333		1	1	1
271	2	5	11	0	1.67	1.91	3.33	1.09	1.55	2.08	1.25	4.5	2.9	3.10526	1	1.8	1	1	1.16667
272	2	5	10	0	2.58	2.91	3.67	2.91	2.45	2.25	2.25	3.13	2.6	2.89474	1.66667	2.1	1.8	2.16667	2.16667
273	2	5	10	0	1.92	2.73	2.5	2.82	2.27	2	1.75	3.38	2.9	2.42105	1.08333	1.5		1	1.16667
274	2	5	10	0	3.25	2.64	2.33	2.36	3.73	2.58	2.67	4.5	4.5	3	1.25	1.8		1.83333	2
275	2	5	10	0	3.25	3.09	2.75	2.45	3.73	3.17	2.5	4.5	3.5	2.73684	1.08333	1.3	1	1.16667	2.16667
276	2	5	9	0	2.42	2.36	3.08	2.82	2.73	2.92	2.92	4	3.5	3.05263	1.25	2.1		1	2
277	2	5	10	0	3.08	3.18	3.83	2.55	3.27	3.33	2.25	3.75	4.3	3.36842	1.08333	2.2	1.4	1.66667	2.83333
278	2	5	10	0	2.75	4	3.75	3.18	2.82	3.33	2.67	3.5	3.4	2.94737	1.41667	2.2	2.2	1.83333	1.66667
279	2	5	10	0	3.75	4.09	3.42	3.09	3.64	3.5	3.08	3.25	2.7	1.68421	1.33333	1.4	1.2	1.16667	1.33333
280	2	5	11	0	2.08	2.27	1.92	2.09	2.73	2.5	2	4.75	4	2.78947	1	1.6		1	1.83333
281	2	5	12	0	2.33	2.45	2.42	2.82	1.73	2.33	2.25	3.63	3.1	3.47368	1.16667	2.1		1.16667	2.16667
282	2	5	10	0	3.92	3.91	3.67	3.55	3.82	3.42	4	4.5	4.2	3.52632	2.66667	2	3.6	3.16667	3.16667
283	1	5	10	0	2.42	3.09	3	2.73	3.09	2.5	2.67	3.5	3.7	2.21053	1		2.4	1	1.33333
284	1	5	10	0	4.25	4.36	5.25	5.27	4.82	5.33	5.75	4.88	1.7				1.6	1.66667
285	1	5	11	0	3.33	3.64	3.83	3.45	4.09	3.75	3.5	4.38	4.4	3.31579	1.16667	1.8	3	1.16667	2
286	1	5	11	0	3.25	3.73	3.67	3.73	3.36	3.67	3.67	3	2.5	2.36842		1.8	2.6	1	1.83333
287	1	5	10	0	2.33	3	3.67	2.45	3	2.08	2.42	4.75	3.4	2.42105	1.33333	1.5	1.8	1.5	2.5
288	1	5	10	0	1.92	2.64	4.08	3.09	4.73	2.67	2.42	4.5	3.9	2.68421	1.33333	1.3	3	1.5	2.16667
289	1	5	11	0	3.17	3.27	2.75	3.36	3	2.08	2.83	4.38	3.4	2.78947	1.08333	1.7		1	1.66667
290	1	5	10	0	2.67	3.36	2.33	2.45	2.27	2.67	2.42	3.63	3.7	2.78947	1	1.4		1	2.16667
291	1	5	9	0	4.08	4.36	2.17	2.73	3.82	2.58	4.33	5.25	2.2	2.63158	1.41667	2.1	1.6	1.33333	1.83333
292	1	5	10	0	2.83	3.91	2.67	2.36	1.64	2.5	3.17	3.13	1.9	3.15789	1.58333	2.3		1.16667	3.33333
293	1	5	11	0										2.42105	1.16667	1.8	1.4	1.16667	1.83333
294	1	5	9	0	3.17	3.36	3.33	3.45	2.18	3	3	4	3.4	2.26316	1.41667	2	1.2	2.16667
295	1	5	10	0	2.58	2.91	3.42	2.36	1.73	2.33	1.83	4.5	3.5	1.63158	1.83333	1.3		1.66667	2.83333
296	1	5	10	0	1.92	2.82	3.67	2.45	2.36	2.58	1.75	4.25	3.6	3.42105		2.1	1.6		2.66667
297	1	5	12	0	2.58	4	3.08	2.18	3.27	3	3.33	4.75	4.6	2.57895	3.83333	2.5	2.2		3
298	1	5	11	0	3.25	3.64	2.92	3.18	2.82	3.5	3.17	3.13	2.4	2.52632	1.25	2.1	3.2	1.5	3
299	1	5	12	0	3.33	3.18	3.5	3.36	2.82	3.75	3	3.63	2.3	2.10526	1.75	2	1.8	1.5	2
300	1	5	10	0	3.42	3.18	4.5	3.27	3.64	3.67	3.08	4.63	4.4		1.08333	1.6	2.2	1	1.66667
301	1	5	10	0										2.78947	4	2.9		2.5	2.83333
302	2	5	11	0	2.58	4.09	3.75	3	4.64	3.33	3	4	3.6	3.57895	1	2.3	1.8	1.16667	2.16667
303	2	5	10	0	2.92	2.91	2.33	3.82	3.36	3.58	2.75	3.38	2.4	1.52632	1.08333	1.5	2	1.16667	1.5
304	2	5	10	0	3.42	2.82	3.17	2.36	2.91	3.33	3.33	4.38	3.2	2.42105	1.75	2.1	3	3	2.33333
305	2	5	10	0	1.58	2.64	1.75	2.55	2.09	3	1.67	3.63	3.9		1.08333	1.6	2.2	1.33333	2
306	2	5	10	0	3	3.27	2.67	3.45	2.64	3	3.17	3.88	3	3.05263		2.7		2.5	3.33333
307	2	5	11	0	3.08	3.09	3.58	2.18	4.18	3.58	2.58	3.88	4.1	3.10526	1.33333	2.4		1.66667
308	2	5	12	0	1.58	2.18	3.75	2.36	1.73	2.83	1.83	3.88	5	2.31579	1.5		2.2	1.5	2.16667
309	2	5	12	0	3.08	2.27	2.75	2.09	3.36	1.42	1.17	4	3.9	2.94737	1	1.4		1	1.33333
310	2	5	10	0	3.17	2.09	4.75	2.36	3.64	2.58	2.42	3.75	3.4	3.42105	1.16667	1.6	1.8	1	1.33333
311	2	5	11	0	1.67	2.82	4.08	3.27	3.18	3.92	2.17	3.38	2.5	2.26316	1.66667	1.8		1.66667	1.83333
312	2	5	10	0	3.33	2.64	3.75	3.09	3.45	2.42	1.58	3.25	3.6	1.94737	1.16667	1.7	2	1.66667	1.83333
313	2	5	10	0	2.67	2.82	4	2.82	2.82	2.75	2.17	3.88	2.7	2.15789	1.41667	1.7		1.33333	2
314	1	5	10	0	3.17	2.82	4.08	3.09	3.55	3.83	3.33	4	2.8	2.42105	1.08333	1.7		1.5	2
315	1	5	12	0	2.75	2.73	3.17	2.82	3.73	2.25	2	4.5	3.6	3.57895	1.5			1.5	3
316	1	5	11	0	3.67	3.18	4.92	3.45	3.82	3.83	4.33	3.38	3.2	1.94737	2.5	1.7		1.66667	2
317	1	5	11	0	2.75	2.64	3.5	2.82	2.18	2.25	1.83	4	3.9	2.36842	2.66667	2.5		2.33333	1.66667
318	1	5	10	0	3	4	3.58	3.45	2.91	2.92	2.58	3.25	3.9	2.94737	1.16667	1.9		1.5	1.83333
319	1	5	11	0	2.25	2.73	2.58	3.09	2.36	3.08	2.08	3.88	4.1		2.25			1.5
320	1	5	10	0	2.08	3	3.58	2.18	2.18	2.42	2.17	3.75	3.2	2.89474	1.5	1.9		1.33333	2.16667
321	1	5	11	0	2.58	3.18	4.92	3	3.82	3.08	2.67	3.13	4	3.10526	1.08333	1.9		1	1.83333
322	1	5	11	0	4	3.82	3.75	3	3.36	2.58	3.92	4.13	3.9	2.47368	1.16667	1.6		1.5	2.33333
323	1	5	11	0	3.75	4	3.08	3.36	3.45	3.08	3.42	3.38	3.7	2.52632	1.5	1.9	1.8	1.5	2
324	1	5	11	0	3.67	3.45	3.92	2.73	3.27	3.33	2.67	4.75	3.1	2.31579	3.41667	1.9	1.2	1.83333	2.33333
325	1	5	11	0	2.75	3.27	3.25	3.55	2.64	2.42	2.92	3	2.3		2.41667	2.1	1.8	3	3
326	1	5	10	0	3.42	2.82	2.83	2.09	3.18	2.08	2.33	4.25	4		1.58333			1.5	2
327	1	5	11	0	2.25	2.91	3.5	2.45	2.18	2.5	3	4	4.1	2.21053	2	1.7	2.6	1.66667	2.16667
328	1	5	12	0	2.42	3.73	2.42	3.55	2.55	2.83	2.33	3.75	2.8	2.21053	2	1.9		1.5	3
329	1	5	12	0	3.33	3.27	3.42	2.82	3	3.67	3.58	4.5	2.7	2.84211	3	2.8	2.4	2.66667	3.5
330	1	5	10	0	3.92	1.82	2.92	2	2.82	2.25	3.25	4	3.1		1.16667	1.6		1	1.5
331	1	5	11	0										3.36842	1	2		1	1.66667
332	1	5	9	0										1.78947	1.5	1.5		1.66667	1.66667
333	2	5	10	0	3.67	2.91	3.17	3.55	2.64	2.83	3	3.5	3.7	2.31579	1.5	2.3			2.16667
334	2	5	11	0	2	2.45	2.83	2.64	1.36	2.58	2.25	4	1.7	1.36842	1.66667	1.1	1.2	1.5	1.5
335	2	5	10	0	3.67	3.73	3.33	3.45	4.55	3.17	3.42	4.13	4.2	2.89474	2.75	2.8		2.33333	3.16667
336	2	5	10	0	3.92	3.64	3.83	3.27	4.45	3.5	3.08	4	4.3	2.63158	2.66667	2.5		2	3.33333
337	2	5	11	0	2.33	2.45	2.17	1.09	2.27	1.83	2.08	3.88	3	2.52632	1.08333	1.5		1	1.83333
338	2	5	11	0	3.17	2.55	3.92	4	2.82	2.92	2.67	3.38	3.7	2.10526	1.08333		2.8	1	2
339	2	5	10	0	2.67	3.09	3.33	2.73	3.45	2.75	3.25	3.5	3.5	1.94737	1.25	1.7	1.2	1.16667	2.16667
340	2	5	12	0	2.92	2.82	3.83	2.82	3	3	3.17	3.38	4.3	3.47368		1.6		1.16667	1.66667
341	2	5	11	0	1.17	2	2.92	1.09	2.73	1.75	1.25	4.25	3.7	3.15789	1.08333	2		1	1.66667
342	2	5	11	0	3.25	3.45	3.58	3.82	2.91	3.67	3.33	3.13	3.4	2.94737	1.08333	2	2	1	2
343	2	5	10	0	3.33	3.27	3.5	2.91	3.55	3.67	3.58	4.75	4.2	3.31579	1.25	2.5		1.5	1.83333
344	2	5	10	0	2.42	2.36	2.42	2	2.36	1.83	2.08	4.25	4.2		1	1.8		1.5	1.33333
345	2	5	11	0	2.08	2.73	1.83	3	2.73	2.83	3.08	4.75	3.8	2.63158	3.33333	2.4	2.6		2.83333
346	2	5	11	0	4.17	3.18	3	3.45	4.73	2.92	3	4.75	4.4		1	1.4	2	1	1.5
347	2	5	11	0	1.92	3.27	2.67	1.91	2.73	2.17	1.17	2.5	3.6		1.08333	1.7		1.33333	2
348	2	5	11	0	2.08	3.09	4.08	2.82	3.09	2.83	2.67	4.63	4.5	2.31579			2.4	1.5	1.83333
349	2	5	10	0	4.42	4.36	2.33	2.73	3.09	2.33	3.58	4.88	4.4	2.78947	1.33333	1.8		1.33333	2.33333
350	2	5	11	0	2.67	2.82	3.67	3.09	2.82	2.75	2.25	4.88	3.8		1.25	1.7	3	1.16667	2.16667
351	2	5	11	0	1.58	2.27	2.25	1.55	2.27	1.58	1.17	4.5	3.6	3.26316	1.16667	1.8	1.2	1	1.5
352	2	5	11	0	3.25	3.45	3.08	3.64	2.64	4.17	2.58	3.75	3.6	2.52632	2.08333	2		1.83333	1.33333
353	2	5	11	0	3.08	3.18	3.25	3.36	2.82	3.5	2	4.88	3.2	2.47368	2.33333	2.5	2.2	2.83333	3
354	2	5	10	0											2.25	2.6		2.66667	2.16667
355	2	5	10	0	2.83	2.91	3.5	2.64	3.09	2.67	2.42	3.75	3			2.1	2.6	1.83333	3
356	2	5	11	0	2.75	2.36	2	2	3.18	1.83	2.08	4.38	4.7		3.75	2.7		2.33333	2
357	2	5	10	0										3	2.25	1.8		1.5	2.83333
358	2	5	10	0										2.57895	1.33333	1.7		1.33333	2.16667
359	1	5	11	0	3.83	3	3.92	3	3.91	2.92	3.42	3.25	3.3		1.66667	2.1		2	2
360	1	5	10	0	2.92	2.73	3.5	3.36	2.91	3.33	3.33	3.88	3	2.21053	2.16667	2.2	1.4	2.33333	2.66667
361	1	5	10	0											2	3.2		2.33333	3.16667
362	1	5	10	0	3.67	2.82	2.5	2.36	4.27	2.58	2.92	4.5	3.6	3.47368	1.58333	3.2		1.83333	2.66667
363	1	5	10	0	2.5	2.64	2.08	2.27	2.18	2.25	2	4.13	2.9	2.89474	1.08333	1.6		1	1.5
364	1	5	10	0	4.33	4.45	3.17	3.18	3.91	2.92	3.25	3.75	2.4		1	2.1			1.5
365	1	5	10	0	2.08	2.27	2	1	2	1.25	1.5	3.88	1.9	2.47368	1	1.7	1.2	1.16667	2
366	1	5	10	0	3.08	3.09	3.67	2	2.64	2.75	4.17	3.63	2.7		1.5	1.7		1.5	1.33333
367	1	5	10	0	2.42	2.82	4.67	2.82	2.82	2.67	2.67	4	3.1	2.89474	1.5	1.9		1.5	1.83333
368	1	5	11	0	3.17	3.64	2.58	3	2.73	2.75	3.25	4.13	3.9		1.41667	1.9	2		1.66667
369	1	5	10	0	2.92	3	3.67	2.64	3.55	3.08	2.42	4.13	4.4	2.31579	1.16667	1.6		1.66667	1.83333
370	1	5	10	0	3.83	3.55	1.75	2.82	3.45	3.17	3.08	4.88	3.4	3.36842		2.7		2	3.5
371	1	5	11	0	2.25	3.09	3.42	2.82	2.73	3	2.75	3.25	2.3	2.57895	1.41667	2.3		1.5	2
372	1	5	11	0	1.67	2.91	3.75	2.64	1.91	2.17	2.08	4.25	3.6	2.63158	1.66667	1.8	2.4	1.83333	2
373	1	5	11	0										2.31579	1.58333	1.8	2	1.16667	2.5
374	1	5	12	0										1.89474	1.08333	1.6	1.4	1.33333	1.5
375	1	5	10	0											1.08333	1.6			1.5
376	1	5	11	0										3.10526	1.75	1.7		2.33333	2.33333
377	1	5	10	0										3.15789				2
378	1	5	10	0										1.15789	3.75	2.1	1.2	2.16667	1
379	1	5	11	0										2.57895	1.16667	2.1	2.2	1.5	2.16667
380	2	5	11	0	3	3.18	2.83	3.36	3.18	3.83	3.17	3.75	2.2	2.21053	1.83333	1.4		1.66667	1.66667
381	2	5	11	0	3	2.64	2.33	2	3.55	2.17	2.17	4.13	4.1	3.10526	1	1.7		1	1
382	2	5	11	0	2.33	2.91	3.42	2.36	2.09	1.83	2.08	3.38	2.6	2.68421	1.08333	1.4	1.6	1.16667	1.16667
383	2	5	11	0	3.58	3	2.83	2.64	3.27	3.08	3.25	3.75	4.5	1.52632	1.5	1.7	1.2	2.16667	1.83333
384	2	5	10	0	3.33	2.18	3	2.45	2.91	2.92	2.58	4.75	3.6	2.57895	1.16667	2.1	1.2	1.16667	2.16667
385	2	5	10	0	2.75	3	2.83	2.45	3.73	2.42	2.75	4.88	3.3	3.15789	1.75	3		1.33333	2.83333
386	2	5	10	0	3.83	3.82	3.5	3.64	3.45	3.75	2.83	3	3.7	2.42105	1.25	2.1		1.5	2.5
387	2	5	10	0	2.42	2.09	2.17	1.82	4.09	2.5	2.17	5.13	4.6	2.63158	1.41667	2	1.2	1.16667	1.5
388	2	5	10	0	2.92	2.82	3.5	2.18	3.18	2.67	2.5	4.13	3.8	2.36842	1	1.7		1.16667	1.66667
389	2	5	11	0	1.92	3.36	2.58	2.91	2.18	3.17	2.17	3	3.1	2.68421	1.33333	2		1.16667	2
390	2	5	11	0	1.5	2.18	1.92	1.45	1.27	2	2.17	4.63	4.1	3.21053	1.41667	2.6	1	1	1.5
391	2	5	11	0	3.25	3.09	3.33	3.18	3.09	2.75	2.67	4.13	3.2	3.42105	1.33333	2.1	1.6	1	1.83333
392	2	5	10	0	1.67	1.36	2.83	1.91	1.09	1.33	1.08	3.63	2.8	1.63158	3.08333	2.6		3.33333	2.83333
393	2	5	10	0	2.17	2.09	3.58	2.45	2.18	1.42	1.42	3.13	2.6	2.52632	1.08333	1.5		1	1.83333
394	2	5	11	0	2.08	2.82	3.58	3	3.09	3	3.33	4.5	2.9	2.68421	1.75	2.3	2.4	1.5	2.33333
395	2	5	11	0	2.17	2.09	2.42	2.73	2.64	2.83	1.92	4.38	3.2	2.89474	1.66667	2.3	2.2	1.33333	2
396	2	5	10	0	1.83	2	4.5	2.73	2.64	3	2.08	4	4.8	3.26316	1.25	1.6		1.33333	1.5
397	2	5	10	0										2.42105	1	1.5		1	1.33333
398	2	5	10	0											1.16667	2	2.4	1.5	2
399	2	5	10	0										3		2.9		3	3.33333
400	2	5	10	0										2.68421	1.66667	2.3	1.6	1.66667	2.66667
401	2	5	11	0
402	2	5	10	0										3.73684	1.08333	1.7	1	1.16667	1.83333
403	1	4	9	0	2.92	2.73	2.92	2.73	3.18	3.08	2.67	3.75	4	2.73684	1.33333	2.2	1.8	1.66667	2.83333
404	1	4	10	0	2.25	2.36	4.08	2.82	3.36	2.42	2.08	3.88	4.6	3.47368	1.58333	2.3	2.2	1.83333	2.66667
405	1	4	10	0	2.33	2.73	3.08	1.82	1.82	1.83	1.33	4.88	3.9	2.15789	1.91667	2.4	2	1.83333	3
406	1	4	10	0	2.75	3.09	3.17	3.09	3	3.17	3.5	5.63	4.1	2.57895	1.33333	1.6		1.33333	1.83333
407	1	4	9	0	3.92	3.64	3.33	3.27	4.09	3.42	3.33	4	3.7	1.73684	3.75	2.9		3.33333	3.33333
408	1	4	9	0	3	3.45	2.67	3.27	2.73	2.83	2.17	3.38	2.7	2	2.5	2.1	2.2	2	2.16667
409	1	4	10	0	1.92	2.36	3.08	3.09	2.64	2.08	1.5	3.25	3.6	3.31579	1.25	2.6	2.8	2	2.16667
410	1	4	9	0	3.92	3.82	3.25	3	3.91	3.25	3.42	3.38	3.3	2.10526	2.08333	1.7		1.33333	1.66667
411	1	4	10	0	1.75	2.55	2.17	2.45	2.27	2.33	2.58	4.25	3.2		1.41667	2.6	2.4	1.33333
412	1	4	11	0	3.58	3.09	3.75	4	4.09	3.17	3.08	4.5	3.4	3.21053	1.75		3.4	1.5	2.33333
413	1	4	10	0	3.58	2.64	3.42	3.27	3.55	2	2.08	4.13	3.6		1.33333			1.33333	1.33333
414	1	4	10	0	2.83	2.36	2.58	2.27	4.18	1.92	1.67	5.13	3.7		2.66667	2.8	3.2	2	2.33333
415	1	4	10	0	2.83	2.45	3.17	2.91	3.09	2.42	2.33	3.5	2.5	3.26316	1.25	2		1.16667	2.16667
416	1	4	9	0	2.5	3.18	3	1.91	2.09	1.83	1.92	3.63	3.8
417	1	4	11	0	3	3.73	4	3.18	3.64	3.58	2.58	4.13	3.2	3	1.25	2		1.5	2.33333
418	1	4	10	0	2.92	2.73	3.42	2.36	3.36	3.17	3.17	4.5	4	2.89474	1.75	2.1	2.8	1.5	2.66667
419	1	4	10	0	2.83	2.91	3.5	2.73	2.55	2.5	2.42	3.88	3.2	3.05263	1.66667	1.7		1.5	2.16667
420	1	4	9	0	1.92	2	3.33	2.18	1.73	2.17	2	4.5	3.5	2.10526	2.91667	1.6		2.5	3
421	1	4	10	0	3.08	2.82	2.58	2.36	3.64	2	1.67	4.25	3.4		1.25		2.6	2.33333	2.33333
422	1	4	9	0	2.17	2.09	4	2.09	3.55	2.75	2.08	3.63	3.4	2.42105	1.75	2.1	2.4	1.33333	2.66667
423	1	4	10	0	2	2.09	2.75	2.82	2.27	1.92	2.08	3.13	2.2	2.89474		2.2		1	2
424	1	4	10	0	3.42	3.45	3.17	2.64	3.36	3.17	2.92	3.63	3.7	2.63158	2.33333	2.4	1.8	2.33333	1.83333
425	1	4	10	0	1.83	2.09	2.92	1.55	2.27	1.83	1.92	4.25	3.6	3.47368	1	2		1	2
426	1	4	9	0	3.5	3.36	3.67	2.82	3.64	2.83	2.67	4.5	3.2
427	1	4	12	0	3.33	3.64	3.42	3.45	3.91	3.33	3.58	3.38	3.2	2.78947	1.83333	1.9	2.8	1.83333	3
428	1	4	12	0	3.17	2.73	2.58	2.73	3	2.42	2.5	4.5	2.5	3.52632		2.3		1.83333	2.33333
429	1	4	10	0	3.67	3.45	3.75	3.27	3	3.33	3.92	3.63	3	2.52632	1.33333	1.4	1.8	1.33333
430	1	4	10	0	2.42	2.73	2.58	2.82	2.45	2.25	1.83	4	3.3	2.73684	1.75	1.8	2.6	1.33333	1.83333
431	1	4	10	0	3.08	2.91	2.17	2.55	3.91	2.58	2.5	5	3.9	3.73684	2.08333	2.6		2.5	2.16667
432	2	4	9	0	1.75	2.82	2.67	2	2.55	2.67	1.67	4.13	4.5	3.31579	1.25	2.2	1	1.16667	1.83333
433	2	4	9	0	3.75	4.09	3.58	3.09	4.82	3.33	4.42	4.63	4.1	2.57895	1.16667	1.6		1	1.66667
434	2	4	10	0	2.5	2.18	4.25	2	2.36	2.33	1.42	3.13	5.2	3.05263	1.5	2.3		1.83333	2.16667
435	2	4	9	0	2.75	2.36	2.25	2.09	3.27	2.25	1.5	4.63	4.2		1			1	1.66667
436	2	4	10	0	1.75	2.27	2.42	1.55	2.36	2	1.42	3.25	4.1	2.78947	1.41667	2.1		2	2.33333
437	2	4	10	0	3.17	2.45	4.42	3.18	3.36	2.25	2.5	4.38	4.1	3	1.58333	2.1		1.5	1.83333
438	2	4	9	0	2.67	2.45	3.08	3.18	2.64	2.75	3.08	3.75	3.1	2.84211	1.08333	1.7	2.2	1	1.66667
439	2	4	9	0	2	3.09	4.33	2.27	3.55	3.08	2.17	4.13	4.6		1.08333	1.5	3	1	1.33333
440	2	4	9	0	2	3.45	2.5	2.36	3.82	3.25	2.58	4.75	3.6	2.89474	1			1.16667	1.5
441	2	4	10	0	2.58	3.27	2.83	2.64	2.82	2.92	3.08	4	4.2	3.52632	1.25	1.7	1.2	1.33333	1.5
442	2	4	9	0	2.67	2.18	2.83	1.55	3.09	2.25	1.75	5.13	4.5	3.31579	1	1.6		1.16667	1.33333
443	2	4	10	0	2.83	3.18	2.58	3.27	3.09	2.83	2.67	4.25	4.1		1.66667	2.6	1.2	1.66667	2.83333
444	2	4	10	0	3.17	2.91	3.25	2.82	3.55	2.83	2.5	4.25	5	2.42105	1.08333	1.4		1	1.33333
445	2	4	10	0	2.75	2.82	3.92	2.91	2.55	3.25	2.08	4.63	4.5	3.15789	1.08333	1.8	1.8	1	1.83333
446	2	4	9	0	3.83	2.55	3.42	2.45	3	2.75	2.67	4.75	3.6	3.15789	1.16667		2.2	1	1.83333
447	2	4	10	0	1.83	1.91	2.83	1.55	2.73	2.08	1.33	4.13	3.3	2.94737	1.16667	2.3		1.5	1.83333
448	2	4	9	0	2.92	3.45	3.75	3.18	3.09	3	2.92	4.13	3.8	3.21053	1.25	2		1.5	2
449	2	4	10	0	1.17	1.91	3.92	2.18	1.27	2.58	1.42	2.63	3.2	2.42105	1.08333	1.9	2.2	1.16667	1.33333
450	2	4	9	0	2.58	3.18	2.58	2.64	3.73	2.25	2.42	3.13	3.5	2.47368	1.16667	1.5		1	1
451	2	4	10	0	3.42	4	3.67	3.73	4.36	3.5	4.25	3.75	4		1.41667	1.6	1.8	1	2.5
452	2	4	10	0	2.25	2.27	1.75	1.18	1.73	1.25	1.42	4.25	4.2	3.47368	1.33333	2.1		1.16667	1.16667
453	2	4	9	0	2.42	2.09	3	3.18	4.45	1.83	1.17	3.38	4.4	2.84211	1.66667	2.3	2.4	1.83333	2.16667
454	2	4	9	0	2.75	3.64	4.75	3.36	3.64	3.92	2.67	3.63	3.5	2.63158	1.25	2.2	2.8	1.33333	1.66667
455	2	4	10	0	4	3.36	3.58	4	4.64	3.75	4.08	4.5	4.6	3.47368	1	2.5	2.6	1.33333	2.33333
456	2	4	10	0	2.67	2.91	3.58	3.09	4.27	4	2.58	3.88	3.6	3.63158	1.58333	2.6	2.8	2	2.5
457	2	4	10	0	3.25	3.27	3.42	2.91	2.91	2.92	3.58	4.63	3.4	1.78947	2.5	1.7		2.16667	2.5
458	2	4	9	0	3.08	3.09	4.67	3.36	3.27	3.33	2.83	4.75	3.8	3.26316	1.91667	2.1		1.5	2.83333
459	1	4	9	0	1.92	2.18	3.92	3.36	3.55	2.17	2.83	3.75	3.7	3.73684	1.16667	2.2	1.2	1	1.83333
460	1	4	10	0	2.75	3	3.83	3.09	2.36	2.83	2.33	3.75	3.3	3.15789		2.3		1.5	3
461	1	4	9	0	3.5	4.18	2.5	3.45	4.64	3.17	3.58	4.25	4.2	3.57895	1.41667	2.3		1.66667	2.83333
462	1	4	9	0	3	2.64	3.42	2.55	3.73	2.5	2.67	4.38	4.5			2.8		2	2.83333
463	1	4	10	0	3.67	3.55	3	3.18	3.45	3.75	3.17	3.25	3.7	3.52632	1		1.8	1	1.66667
464	1	4	10	0	2.75	2.09	3.42	2.82	2.36	3.33	2.75	4.5	4.8	3.26316	1.41667	3		1.66667	3
465	1	4	8	0	2	2.45	3.92	2.36	2.18	3.17	2.67	4.5	4.1	2.68421		1.7
466	1	4	10	0	3.17	2.64	3.33	1.82	3.36	1.33	2.08	5.5	4.4	3.36842	1	1.6	1.6	1	1.66667
467	1	4	9	0	3.33	4.27	3.5	3.45	3.09	3.33	2.92	3.75	3.6	2.52632	1	1.6	1.4	1.16667	1.66667
468	1	4	9	0	2.33	3.45	4	2.73	4.27	3	3.5	5.13	4.5		1.58333
469	1	4	10	0	3.67	3.45	2.5	2.73	3	2.83	2.58	5.13	4.2	3.26316	1.08333	1.8		1.16667	2.33333
470	1	4	9	0	2.42	3.45	2.75	2.27	3	2.83	2.58	4.38	2.1		2.08333	2.4		1.5	2.66667
471	1	4	10	0	2.92	2.82	4.08	3.45	2.82	3.42	3.25	2.88	3.2	3.36842	1.75	3.3	2.8	2
472	1	4	10	0	1.75	1.91	3.67	1.82	2.55	2.08	2.33	4.38	4.4	3.05263		1.8		1.83333
473	1	4	10	0	2.42	3.64	3.67	2.36	3.09	2.5	2.5	3.88	3.2		1.33333	2	3.2	1	3
474	1	4	10	0	2.92	3.18	3.42	3	3	3	2.83	3.25	2.5	2.89474	2.08333	2.3		2.5	2.16667
475	1	4	10	0	3.42	2.91	3.33	3.18	4	3.25	3.42	4.63	4.4	2.36842	1.5	1.8		1.66667	1.5
476	1	4	10	0	4.58	3.45	2.33	2.45	3.82	3.08	3.33	4.63	3.2	3.73684	1.16667		3.2	1.33333	3.5
477	1	4	10	0	3.83	3.27	2.33	2.91	3.64	2.83	3.08	4.13	3.7	1.84211	1.75		1.2	2.16667	1.83333
478	1	4	10	0	3	3.55	3.42	2.91	3.45	2.67	3.08	4.38	3.6			3.1	2.2	2.16667	3
479	1	4	10	0	3.75	3.91	3.58	3.73	3.82	4.08	3.75	3.88	3.8	1.78947	3.16667	2.7	1.4	4	2.16667
480	1	4	10	0	1.92	4	2.92	2.55	3.64	2.25	2.92	4	4.7		1.16667	2		1.33333	1.66667
481	2	4	9	0	1.92	2.45	3.08	1.45	2.27	1.33	2	4.75	4.2	2.94737				1	1.83333
482	2	4	9	0	3.42	2.91	3.5	3.18	2.64	3.33	2.83	3.38	3			1.4	1.2	1.33333	2.16667
483	2	4	10	0	2.83	3.18	3.67	3.27	3.82	3	3	4	4.5	3.57895	1.16667	2	2.2	1.33333	1.33333
484	2	4	10	0	2.25	3.09	3.75	2.73	2.18	3.17	2.92	4.13	2.9	2.57895	1.08333	1.6	1.4	1.66667	2.5
485	2	4	9	0	2.58	3.18	3.67	3.27	3.55	3.08	3	3.75	4.8	2.52632	1.25	1.6	1.8	1.33333	2
486	2	4	9	0	2.42	2.73	3.5	3	3.82	3	2.42	4.38	3.8	2.63158		2	2.8	1	2
487	2	4	10	0	2.25	2	3.33	3.18	3.45	2.58	2.83	3	3.2		1.25	1.4	1	1.16667	2.16667
488	2	4	10	0	1.75	3	2.75	2.36	1.73	3.33	1.67	4.88	2.7	2.26316		3.1	2.6	1.66667	2.33333
489	2	4	9	0	2.25	2.73	2.92	1.73	2.82	1.92	2.08	4.63	3.1	3.57895	1	1.7		1.16667	1.33333
490	2	4	10	0	2.5	2.55	2.58	3	2.27	2.17	2.25	4.38	2.8	2.47368	2.16667	2.1	2.4	2.33333	2.16667
491	2	4	10	0	3.33	2.27	3	4.18	2.09	3.08	3.17	2.13	1.8	2.68421	1.91667	2.3	3.2	2.66667	3
492	2	4	10	0	3.33	3.45	2.92	2.82	3.27	2.58	3.33	3.75	2.9	2.10526	1.75	2	1.4	2.16667	2.5
493	2	4	10	0	3.92	3.91	2.58	3.27	3.73	3.17	3	4.38	2.3	3.15789	1.5	2.6		1.33333	3
494	2	4	10	0	1.42	2.36	2.92	1.73	2.55	1.92	1.08	4.13	3.9	3.47368	1.33333	1.7	2.8	1.16667	1.5
495	2	4	9	0	2.17	2.91	3.75	2.09	2.55	2.08	2.17	3.75	4.4	3.36842	1.33333	2.2		1.33333	1.83333
496	2	4	9	0	3.5	3.55	3.42	3.27	4.45	2.67	3.75	4.75	4.6	3.05263	1.16667	1.7	2.8	1.83333	2.83333
497	2	4	10	0	3.75	3.55	2.83	3	4.55	2.83	2.67	5.13	4.1	3.31579	1.66667	2.7	3.2	1.5	2.66667
498	2	4	10	0	3.58	3.09	3	2.64	4.45	3	2.5	4.38	4.2	2.68421	1.41667	2.1		1.16667	2.33333
499	2	4	9	0	3.25	3.18	3.92	3.64	4.27	3.5	3.58	4.25	4.8	1.94737	1.25	1.5	1	2
500	2	4	10	0	1.58	2.91	3.75	1.64	2.91	2.5	1.58	5.25	3.6	3.10526	1.5	2.2	3.4	1.33333	2.66667
501	2	4	10	0	3.17	3.45	3.67	3.27	2.27	3.25	3.5	2.38	2.2	1.73684	1.33333	1.7	1.8	1.5	1.83333
502	2	4	10	0	1.5	3	4.42	2.36	2.36	2.83	1.75	2.75	3.4	2.57895	3.08333	2.3		1.33333	3.5
503	2	4	9	0	2	3.09	3.83	2.82	2.73	2.75	2.58	4.13	3.5	2.15789	1.91667	1.9	2.6	1.83333	3
504	2	4	10	0	2.42	2.91	3.75	3	2.91	2.33	2.75	3.63	4.1	2.84211	1.75	2.2	2.8	1.66667	3
505	2	4	9	0	2.5	3.27	3.08	3.45	2.91	3.17	3.5	4.25	3.5	2.68421	1.16667	1.4	1	1.16667	1.83333
506	2	4	10	0	2.92	3.18	4	3.18	2.73	2.83	2.5	4	3.4	3	1.33333		2	1.16667	2.33333
507	2	4	10	0	1.58	2.09	3.25	1.91	3	1.58	1.67	4.25	4.2	3.10526	1.5	2	2.2	1.83333	2.5
508	2	4	9	0	1.58	2	2.17	1.18	2.27	1	1	4.38	3.1	2.63158		1.6	1.8	1.16667	1.66667
509	2	4	10	0	2.33	2.64	5.17	2.91	3.09	2.33	2.42	5.75	4.5	2.68421	1.5	2.1	1.4	1.16667	2.16667
510	2	4	10	0	3	2.27	2	1.36	2.91	1.83	2	5.13	2.2	3.05263	1.25		1.6	1.33333	1.66667
511	2	4	10	0	3.17	3.27	3.17	3.64	3.36	3.58	3.58	3.13	2.8	2.73684	2.08333	2	2.8	2	2.83333
512	1	5	10	0	1.83	2.64	4.75	2.91	2.27	2.5	1.83	2.5	3.7	3.78947	1.16667	1.6		1.16667	2
513	1	5	11	0	2.08	2.91	3.67	2.18	3.18	3.25	2.92	2.88	3.1	2.47368	1.75	1.7		1.83333	1.5
514	1	5	11	0	3.08	2.73	2.92	2.18	3.09	2.75	2.25	3.63	3.9	3.21053	1.16667	1.9		1.16667	2
515	1	5	11	0	1.58	1.82	1.92	1	1.55	1.67	1.08	4.13	3.7	3.63158	1.25	1.9		1.5	2.16667
516	1	5	10	0	3.67	3.82	2.75	3.18	4.36	3.08	3.33	4.25	3.6		1.33333	1.8	3	1.33333	2
517	1	5	10	0	2.08	2.82	1.83	1.09	2.18	2.58	1.67	4.75	3.4	3.68421	1.33333	2.9		1.83333	2.16667
518	1	5	11	0	3.08	2.45	3.33	3.09	2.82	2.33	2.08	4	3.6	2.57895		2.6		2.33333	2.83333
519	1	5	11	0	3	2.64	2.42	2.18	3.09	2.17	1.5	4.88	4.7	2.57895	1				2.16667
520	1	5	11	0	3.5	2.91	1.5	2.64	3.82	2	1.58	4.63	4.1	1.94737	1.91667	1.7		1.83333	2
521	1	5	11	0	2.08	3.09	1.92	2.27	3	2.08	3.58	4.75	3.4	3.31579	1.5	2		1.5	2.5
522	1	5	10	0	1.5	2	2.25	1.91	1.91	2.42	1	3.5	3.5	3.10526	1	1.6		1	1.16667
523	1	5	10	0	2.5	2.91	3.67	2	3	2.42	1.92	4.38	4.2	3.21053	1.5		1.8	1.66667	3.33333
524	1	5	11	0	3.25	4.55	2.5	3.45	3.91	3.5	3.75	3.5	4.5	1.73684	3		1.8	2	2
525	1	5	11	0	2.92	3.09	2.83	2.73	1.73	2.58	2.33	4.75	4.5	2.21053	2.5	2.7	2.4	1.83333	3
526	1	5	10	0
527	1	5	10	0	3.17	2.73	3.58	2.82	2.55	3	2.58	3.25	2.9		2.41667	2.5	1.6		2.5
528	1	5	10	0	2.33	3.55	4.08	2	3	2.5	2.5	3.5	3.8	3.78947	1.33333	2.3		1
529	1	5	10	0	2.75	3.82	1.92	2.73	3.55	3.42	2.17	4.38	3.9
530	1	5	10	0	3	2.2	2.83	2.27	3.82	1.92	1.75	4	4.7	3.26316	1.83333	2.4		1.83333	2.66667
531	1	5	11	0	2.5	2.27	2.58	2.45	2.73	2.25	2.5	4.13	3.6		1.08333	1.9			2.33333
532	1	5	11	0	3.75	3.36	3.33	3.55	3.55	3.42	3.5	3.5	3.8	3.05263	1.16667	1.3	2.8	1.16667	1.83333
533	1	5	12	0	2.08	2.55	2.67	2.27	2.91	1.92	2.08	3.75	3.7	3		1.9		1.83333	1.83333
534	1	5	11	0	2.67	2.82	3.83	3.09	4.27	3.17	3.67	4.38	4.5	3.57895	1.33333	2.1		1.16667	1.66667
535	1	5	10	0	2.92	2.45	1.83	3.09	3.36	2.42	2.75	3.13	4.5	3.15789	1.83333		2.2	2	3
536	1	5	10	0										1.57895	3.08333	1.6	1.4	2	2
537	2	5	12	0	3.5	3.45	2.42	3	4.64	2.58	3.42	5.38	3.7
538	2	5	11	0	2.67	3.55	3.33	3.27	4.36	3.42	2.33	4.25	4.7	2.26316	1.83333	2.7		2.5	2.83333
539	2	5	11	0	2.17	3.18	3.75	3.27	2.64	3.08	2.42	2.75	3	2.15789	1.66667	2.7		2.33333	2.33333
540	2	5	10	0	2.42	2.82	2.92	2.91	2.91	2.83	2.83	3.63	3.8	2.89474	1	1.7		1	1
541	2	5	10	0	2.83	2.91	2.92	3.27	2.55	3.17	2.83	2.5	2.4		1.25	1.8		1.33333	2.16667
542	2	5	10	0	2.17	2.73	2.25	2.36	3.55	2.58	2.08	5	4.6	3.05263	1.25	1.7	1	1	1.16667
543	2	5	10	0	3.25	2.36	2.58	2	3.73	2.75	2.67	4.38	4.9	3.05263	1.08333	2.5	1	1.33333	2.16667
544	2	5	11	0	3.5	3.82	3.17	3.18	4.45	3.5	2.58	3.63	4.9	2.36842	1.25	1.7		1.33333	1.33333
545	2	5	11	0	2.58	2.36	3.08	2	2.36	2.33	2	4	3.7	3.05263		1.9		1.83333	2
546	2	5	11	0	2	2.82	3.75	1.91	3.27	1.83	2.17	4.63	4.9	2.94737	1.25	1.8	2.6	1	2
547	2	5	11	0	3.08	2.55	4.08	2.82	3.27	2.58	3.17	4.63	4.1	3.26316	1.66667	2.6		3.16667	2.16667
548	2	5	11	0	3.42	3.64	3.5	2.36	3.36	3.67	2.83	3.63	3.9	3.15789	1.58333	2.6		1.5
549	2	5	11	0	1.92	1.82	3.58	2.91	2.73	2.92	1.08	2.13	3.4	3.73684	1.66667	2.2		1.16667	1.83333
550	2	5	10	0	3.25	2.55	2.33	2.36	3.36	2.17	1.67	4.75	2.5	2.68421	1.33333	2.1		1.33333	1.83333
551	2	5	11	0	1.67	2.82	2.83	1.64	3.18	2	2.83	3.38	4.5	3.21053	1.58333	2.1		1.5	2
552	2	5	11	0	3	2.73	4.25	3	2	3.5	3.42	5	3.3	2.68421	1.5	1.9		1.5	2.16667
553	2	5	10	0	2.75	3.18	2.67	2.36	2.73	2.58	2.08	4.88	3.6	3.05263	1.58333	1.9		2.33333	2.83333
554	2	5	10	0	1.83	2.09	2.08	1.82	2.45	1.92	1.92	4.38	3	3.42105	1.58333	2.4	2.2	1.5	2.16667
555	2	5	10	0	2.17	2.82	3.25	2.91	2.55	1.83	2	4.25	4.2	3.63158	1.5	2.1		1.16667	1.66667
556	2	5	10	0	2.17	3.55	2.92	2.18	2.18	1.42	1.92	5	2.9
557	2	5	11	0	2.5	3.09	3	3.55	4.36	2.92	2.33	3.63	4.5	3.47368	1.41667	2		1	1.83333
558	2	5	10	0	1.5	3	1.92	1.18	3	1.5	1.25	2.75	3.1	3.63158	1	1.6		1	1.5
559	2	5	10	0	3.58	4.18	3.17	4	4.18	4.08	4.67	5	3	3.26316	1	2	3	1	2.5
560	2	5	11	0	1.67	3	4.17	2.73	2.45	2.92	2.75	3.13	3.7	3.15789	1.41667	1.6		1.16667	2
561	2	5	11	0	2.75	2.73	2.08	2.09	4.55	2.25	2	3.63	3.9	3.57895	1	1.4		1	1.16667
562	2	5	10	0	3	2.82	3.5	2.55	3.27	1.92	2.67	4.5	3.1	2.94737	1.16667	1.9		1.5	1.83333
563	2	5	10	0	2.83	2.82	2.92	3.09	3	2.58	3.08	4.25	4.1	3.57895	1.16667	2.1		1.16667	2
564	2	5	10	0	3.67	3.82	2.58	2.27	4.27	3.25	3.5	4.5	4.5	2.10526	1.16667	1.5	1.2	1.16667	1
565	2	5	10	0	1.92	2.73	2.5	2.73	2.91	2.5	2.08	2.5	3.2	2.84211		1.6		1	2.16667
566	1	5	10	0	4.25	2.91	2.58	3.73	3.27	3.25	2.92	3.25	3	2.42105		2.2		1.66667	2.33333
567	1	5	10	0	3.25	2.55	4	3.36	2.45	3.33	3.17	3	3.1	3.10526	1.16667	1.8		1.5	2.5
568	1	5	11	0	1.33	1.82	1.75	1.27	1.91	1.75	1.58	3.38	1.6	3.15789	1.25	1.9		1.66667	2.83333
569	1	5	11	0	1.58	1.82	2.67	1.91	2.45	2.42	2.42	4.25	4.2	2.73684	1.58333	2.2	1.6	2	2.83333
570	1	5	11	0	4.17	2.64	3.67	3.27	4	3.33	3.33	4.25	3.6	2.73684	1.08333	2.1		1.16667	2.16667
571	1	5	11	0	3.5	3	2.67	2.18	2.27	2.5	2.25	3.5	4.3	2.63158	1.5	2.3	2.4	1.66667	2.33333
572	1	5	10	0	1.92	2.91	3.33	2.27	2.55	3.17	3.25	4.88	5	2.78947			2.8	2	2
573	1	5	12	0	1.42	2.09	2.25	2.09	2.09	2.33	1.42	4.38	2.7	3.42105	1.08333	2.3		2	2.16667
574	1	5	11	0	2.08	2.09	2.42	2.73	2.27	2.5	1.42	3.38	2.8	2.89474	1.33333	1.7	1	1.5	1.66667
575	1	5	10	0	2.5	3	5	2.45	2.73	3.58	3.92	4.63	3.7	3.42105	1.08333	2.2		1.33333	2.83333
576	1	5	10	0	3.17	2.73	2.92	2.73	4.18	2.58	2.92	3.88	3.8		1.25	2.3		1.83333	2.16667
577	1	5	11	0	2.83	3.18	3.17	3.73	3.36	3.17	3	3.75	3	2.78947		1.9			2.16667
578	1	5	10	0	3	2.64	3	3.55	3.45	3.08	3.67	2.63	3.2
579	1	5	11	0	2.5	2.91	3.33	3.18	1.73	2.58	3.58	4	4.1	2.52632	1.08333	1.6		1.66667	1.5
580	1	5	10	0	2.5	2.64	3.17	2.64	2.55	2.42	2.75	3.25	3.6	1.68421	2.41667	2.4		3	2.66667
581	1	5	10	0	3.33	3.55	3.42	3.27	4.45	3.08	4.5	4.25	2.7	3.26316	1.08333	2		1.5	1.83333
582	1	5	11	0	3.75	3.18	3.58	3.55	4.27	3.25	3.75	3.5	4.2	3.05263	1.58333	1.8		1.83333	2.5
583	1	5	10	0	2.58	2.64	2.92	2.18	2.09	2.92	2.08	4	3.8	2.78947	1.41667	1.8		1	1.83333
584	1	5	11	0	3.33	3.27	3.17	3.18	4.45	3	3	3.25	3.7	3.78947	1.08333	2.2		1	2
585	1	5	11	0	2.42	2.73	3.5	2.55	2.36	2.75	2.58	4.38	3.5	3.36842	1.25	1.8	2.8	1.5	2.5
586	1	5	11	0	3.58	3.18	2.58	2.64	4.64	2.92	2.58	3.75	4.1	3.26316	1.33333	2.3		1.33333	3
587	1	5	11	0	2.5	2.91	2.25	1.82	2.91	1.92	1.92	3.5	3.9		1.66667	1.9		1	2.5
588	1	5	11	0	2.67	3.09	2.92	3	2.55	3.08	3.17	3.88	3.3		1.25	2		2	1.5
589	1	5	10	0	2	2.73	3.17	2.18	1.45	1.83	2.58	4.88	3.9	2.73684	1.58333	1.2		1	1.5
590	1	5	11	0											1.08333	2		1	2
591	1	5	10	0	2	2.64	3.75	1.91	2.82	1.33	1.42	4.38	4.4	3.36842	1.75	2.3		2.5	2.66667
592	2	5	11	0	3.5	3	3.33	2.91	4	3	3.25	2.63	4	3.36842	1.33333		1.8	1	1.5
593	2	5	11	0	2.83	3.45	3.5	3.36	3.64	3.08	3.92	3.5	2.8	2.89474	1.33333	2.4	2.8	1.66667	2.33333
594	2	5	10	0	3.67	3.27	3.83	3.73	4.36	2.92	2.42	4.63	4.5	2.36842	2.16667	2.4	1.8	2	2.33333
595	2	5	11	0	2.83	2.91	4.17	2.45	3.18	2.33	3	3.88	3.6	2.73684	1.41667	2.3	2	1.66667	2.66667
596	2	5	10	0	1.5	2.18	3.5	2	1.82	2.58	2	3.13	3	2.10526	1.16667	1.3		1.33333	1.83333
597	2	5	10	0	3.17	3.27	3.42	3.09	2.82	2.83	3.08	4.5	2.5	2.84211	1	1.8	2.6	1.33333	2.83333
598	2	5	11	0	1.67	2.36	1.17	1.55	1.36	2	1.5	4.63	4.7	2.63158	1.25	1.8	1	1.33333	2
599	2	5	10	0	3.25	2.45	2.92	1.45	3.82	1.75	2.58	4.38	4.4	3.73684	1.08333	1.8		1.16667	1.66667
600	2	5	10	0	3.5	4	2.5	2.09	3.45	3.33	2.92	5.38	3.7	2.94737	1.5	2.5		2.5	2.33333
601	2	5	10	0	2.08	2.91	3.42	2.55	2.55	2.5	2.42	3.88	4.2		1.25	1.7		1.16667	1.66667
602	2	5	10	0	1.92	3.09	3.33	2.45	2.55	3.08	1.92	3.13	3.6	3.21053	1.25	1.8		1.33333	2.16667
603	2	5	11	0	3.67	3.36	3.33	2.91	3.27	3.08	4.08	4.63	3.7	3.15789	1.41667	1.9	3.2	1.33333	2
604	2	5	11	0	2.33	3.36	3	2.55	2.64	3.33	2.08	3.5	2.9	3	1.33333	2	1	1.83333	2.66667
605	2	5	11	0	2.83	3	3.25	2.55	2.09	1.92	2.83	3.88	4	3.78947	1.16667	2.6		1.16667	2
606	2	5	11	0	3.42	3.27	3.92	3.09	4.18	3.17	3.25	4.38	3.7	3.05263	1.08333	1.7	1	1.16667	1.66667
607	2	5	10	0	2.17	2.27	3	2	3.36	2.42	3.08	3.75	4.1	3.31579	1.25	1.8	2.6	1	2.5
608	2	5	10	0	2.92	2.73	3.33	2.55	3.91	3.33	3	4.13	3.8	3.21053	1.08333	2	1.2	1	1.66667
609	2	5	10	0	2.83	2.82	3	2	2.82	3.08	2	3.88	3.8	2.84211	1.33333	2.1	1.8	1.66667	2.5
610	2	5	11	0	2	2.45	3.42	2.18	3.18	2.08	1.42	3.88	3.9	3.05263	1.25	1.8	1	1.33333	1.83333
611	2	5	10	0	2.92	2.64	2.75	2.64	3.82	2.33	1.92	3.75	3.9	2.47368	1.25	1.8	1.4	1.5	1.83333
612	2	5	11	0	3.42	3.36	3.33	2.82	3	2.75	2.67	4.13	4	3.36842	1.33333	1.9		1.16667	1.83333
613	2	5	11	0	3.5	3.36	3.42	3.45	3.91	3.42	3.08	3.75	4	2.84211	1	2.3	2.8	1.16667	2.83333
614	2	5	11	0	1.33	1.91	2.5	2.55	2.36	2	2.25	5	4	2.73684	2.66667	1.9		1.33333	2.5
615	2	5	10	0	1.83	2.82	2.42	2.82	2.55	2.75	1.83	3	3.5		1.08333	1.3		1	1.16667
616	2	5	11	0	3.58	3	3.42	2.82	4.82	2.75	2.67	4.63	4.5	3.31579	1.33333	2.1	2	1.16667	2.16667
617	2	5	10	0	2	2.45	4	2	2.73	2.33	2.58	2.88	2.5	2.26316	1.41667	1.6		1.5	1.16667
618	2	5	10	0	1.92	3.73	3.25	2.64	2.73	2.17	2.25	4.75	3.1	2.36842	1.5	2		2.33333	2
619	2	5	11	0	1.83	2.64	3	2.45	2.09	2.25	1.25	2.88	2.7	3.36842	1.16667	1.8	2.8	1	2
620	2	5	11	0	3.5	3.64	2.67	3.18	4.45	3.58	3.75	3.88	2.7	3.47368		2.7		1.16667	1.83333
621	2	5	10	0	2.17	2.55	2.92	1.91	3.18	2.58	1.83	2.75	2.6	2.21053	1.41667	1.9		2.33333	2.5
622	2	5	11	0	3.25	3.36	3	1.82	2.82	3.25	2.58	3.88	3.7	1.63158	1.83333	1.8	2.4		2.16667
623	2	5	11	0	3.83	2.82	3.5	3.82	2.91	2.83	1.75	4.25	4.2		2.25	2.4	1.2	2.16667	2.16667
624	1	4	10	0	3.08	2.91	3.36	3.64	2.7	2.6	2.25	4.38	2.6	2.84211	1.08333	2.7	1.8	1	2.33333
625	1	4	10	0	2.92	3.18	3.25	3.09	2.55	2.73	3	4.25	2.4			1.7	2.2	1.33333	2
626	1	4	10	0	3.08	2.64	3.17	2.9	2.55	2.25	2.67	4.5	2.5	2.89474	1.5	2.2		1.33333
627	1	4	10	0	2.67	3.36	4.42	2.36	3.27	3.58	2.33	4.25	3.1	2.15789	1.16667	1.5	1.6	1.5	2
628	1	4	10	0	2	2.45	2.75	2.18	2.36	2.42	2.08	3.38	3.4	2.73684	1.33333	1.8	2	1.33333	2
629	1	4	9	0	1.58	2.64	5.17	2.36	2.18	1.67	2	4.88	3.6	3.26316		2.6	2.6	1.5
630	1	4	9	0	4	3.91	4.67	4.36	3.45	3.5	3.83	4.63	3.4	2.47368	1.83333		3	1.33333	2.33333
631	1	4	10	0	3.25	3.27	3.67	3	3.36	3	2.42	3.88	4.2	2.21053	1.91667	2.2		2.16667	1.33333
632	1	4	9	0	2.67	2.73	3.33	2.45	4.09	2.92	3.58	3.75	3	3.21053		3	2.6	1.5	3
633	1	4	9	0	4.17	4.09	4.17	3.36	3.45	3.5	3.33	2.25	3.5		1.58333	2.5	2	2	3
634	1	4	10	0	3.33	2.73	2.42	1.91	3.18	2.42	1.25	5	4.8	3.21053	2.16667		2.4	1.83333	2.5
635	1	4	9	0	3.5	3.18	3.58	3.45	3.45	3.25	3.67	3.13	3.3		1.33333	1.6	1.8	2	2.16667
636	1	4	10	0	2.83	3.64	3	4	3.64	3.25	3.67	3.5	3.5	2.36842	1.41667			1.66667
637	1	4	9	0	3.42	2.91	3.58	2.91	3	3.08	3.25	4.13	3.2	2.26316	2.25	1.8	3	1.66667	2.33333
638	1	4	11	0															2.66667
639	1	4	8	0										1.78947	1.75	1.7	1.4	1.83333	2.66667
640	2	4	10	0	3.33	3.27	3.42	3.36	4.09	3.5	3.42	4.25	4.4	3	1.58333	1.9		1.5	2
641	2	4	10	0	2.92	2.73	2.92	3.09	2.09	2.17	2	3.5	2.6	2.21053	1.16667	1.9	2.6	1.33333	1.83333
642	2	4	10	0	1.92	3.18	3.25	4	2.55	2.33	2.42	3.25	2.3	3.10526	1.5	2	3.6	1.33333	2.5
643	2	4	10	0	2.08	3.27	4.33	2.64	4.27	3.5	3.33	5.13	5	2.52632	1.41667	1.4	2	1.5	2
644	2	4	9	0	3.17	2.45	4.42	3.09	3.09	3.08	2.33	3.5	3.5	3	1.16667	2	2.6	1.16667	2
645	2	4	9	0	3.25	2.82	2.92	2.64	2.45	2.75	2.08	3.38	3.9	2.84211	1.08333	1.7	3.2	1	1.5
646	2	4	9	0	2.33	3.18	4.25	2.91	2.45	2.5	2.08	4.38	4.3	3.36842	1.5	2.2		1.66667	2.5
647	2	4	9	0	2.5	2.73	4.42	3.36	3.18	2.5	2.5	3.63	4.3	2.73684	1.33333	2	2.6	1.66667	1.83333
648	2	4	10	0	2.58	3.36	3.42	2.55	3.18	2.25	1.5	2.63	3.2	2.94737	1.33333	1.5	2	2
649	2	4	9	0	2.42	2.45	2.17	1.18	2.09	2.08	1.08	3.38	3.3		1	2.2	2.8	1.16667
650	2	4	10	0	3.42	3.64	4.42	2.73	3.18	3.67	4	3.38	3	2.15789	1.91667	2	2	1.5	1.83333
651	2	4	11	0	3	3.09	3.67	2.45	2.18	3.42	1.92	3.63	3.4		1.58333	2.2	2.6	2.16667	2.66667
652	2	4	9	0	2.83	3.55	2.92	3.36	3.82	2.58	3	3.75	3.5	2.10526	1.16667	1.4	1.6	1.33333	1.5
653	2	4	10	0	2.83	3.64	3.08	3.91	2.09	4.5	3.92	5.13	2.8	3	2.33333		1.8	1.66667	2.5
654	2	4	10	0	4.5	4	1.67	3.18	3.73	3.17	4.08	4	3	2.52632	1.75		2.6	1.83333	2.33333
655	2	4	9	0										3.10526	1.33333	2.1	2.8	1.5	2.33333
656	2	4	9	0	2.5	3.27	3.33	3.45	3.18	3	3	4.88	3.7	3.10526	1.75	1.7	3.4	1.5	2.5
657	2	4	10	0										2.73684	1.25		1		1.16667
658	1	4	11	0	2.5	2.91	3.08	1.45	4	1.92	1.58	4.5	2.3		1	1.7	1.4	1.16667	1.5
659	1	4	9	0	2.25	3.27	4	3.73	2.55	3.92	3.08	3.25	3.6	2.68421	1.33333	2.4		2.16667
660	1	4	10	0	4.25	3.45	2.83	2.91	2.55	2.75	3.42	4.75	2.9		1.58333	2.6	2.8		2.5
661	1	4	10	0	2.42	3.45	4.33	3.36	3	3.42	3	3.5	3.3		1.58333	2.2		2	1.83333
662	1	4	11	0	3.25	3.64	3.92	3.36	3.64	3.42	3.83	4.13	4		2.33333			1.83333	2.16667
663	1	4	10	0	2	2.09	3.67	2.45	2.09	2.17	1.92	4.88	3.8	2.42105	1.75	1.8	2	1.33333	2
664	1	4	10	0	2.67	3.64	4.08	3.45	3.55	3.67	4.17	3.88	3.7	2.05263	1.58333	1.7	1.6	1.5	2.16667
665	1	4	10	0	3	2.73	4	2.73	2.55	3.33	2.42	3.5	3.5	2.68421	1.08333	1.3	2.6	1.16667	1.33333
666	1	4	10	0	3.58	3.18	3.25	2.27	2.64	2.67	3.17	4.5	3.9	3.10526	1.33333	2.8	2.2	1.83333	2.5
667	1	4	9	0	2.42	3.64	3.83	2.36	3.55	3.33	2.58	4.75	3.7	2.84211	1.33333	2.1	3	1.33333	1.66667
668	1	4	9	0	2.67	2.27	3.25	1.09	1.82	1.33	1.5	4.63	3.1	2.94737	1	1.6	2.2	1	1.66667
669	1	4	11	0	2.5	2.73	3.92	2.73	2.45	2.58	2.08	3.63	2.5		1.66667	2.1	2	2	2.33333
670	1	4	9	0	3.75	3.36	3.67	2.82	1.91	2.42	3.83	4	2.2	2.57895	2.41667	2.3	2	2.33333	3.16667
671	1	4	11	0	2.83	3.36	2.75	3	3	3.58	2.75	3.75	3.7	1.78947	2.33333	2.4	2	1.66667	3
672	1	4	9	0	2.58	2.64	2.75	2.82	2.82	2.33	2	4.25	4.2		2.33333	2.3	2.4	2.16667	2.66667
673	1	4	9	0	1.75	1.91	1.58	1.45	1.27	1.83	1.17	2.88	3	3.57895	1	2	2.4	1	3.5
674	1	4	10	0	3.83	2.36	4.67	1.09	2.18	3.58	2.25	3.63	3.6		1.66667	1.8	2	2.66667	2
675	1	4	11	0											1	1.7	2.4	1	1.5
676	1	4	9	0										2.52632	1.16667	1.4	2	1.33333	2.33333
677	1	4	10	0											1.16667	2	1.6	1.33333	2.83333
678	1	4	9	0										3.26316	1.75	1.7	3.2	1.5	3
679	1	4	9	0											1.41667	1.9	2	1.66667	1.83333
680	2	4	9	0	1.75	3	3.5	3.36	4.18	2.92	2.17	4.75	2.3	2.47368	1.66667	1.7	2.6	1.66667	2.83333
681	2	4	9	0	2.92	2.64	2.75	3	3.73	2.5	2.92	4.75	3.8	2.94737	1.33333	1.8	1.8	1.5	2.5
682	2	4	9	0	3.5	3.27	3.25	3	4	2.67	2.58	4	4.6			1.7		1.33333	2.16667
683	2	4	9	0	1.75	2	2.58	1.82	2	2	1.5	5	3.3	2.68421	1.41667	2	2	1.33333	2.5
684	2	4	9	0	2	1.73	3.33	1.73	2.55	2	1.58	4.25	3.4		1.33333	2	2.2	1	2
685	2	4	9	0	2.5	1.36	2.25	1.64	3.82	2.17	1.5	4.75	4.1	2.94737		2.4	3.2	1	2.16667
686	2	4	10	0	1.75	3.27	3.75	3.09	2.73	2.75	1.67	3	3.1	2.84211	1.33333	2	2.2	1.16667	2.33333
687	2	4	10	0	3.08	2.36	4.17	2.27	2.64	2.67	1.92	4.13	3.7	2.57895	1.83333	2.3	1.2	1.33333	2.66667
688	2	4	10	0	2.67	3.09	3.75	2.82	3.55	2.67	2.17	4.5	4.6	3.15789		2	2.8	1.5	2.66667
689	2	4	9	0	1.5	2.55	3	1.73	2.55	2.5	1.33	3	2.8	3.05263	1	1.6	3.4	1	2.5
690	2	4	9	0	2	2.27	3.42	1.73	2.36	1.92	1.75	4.75	5.1		1.33333	1.7	1.4	1	2.33333
691	2	4	11	0											1				1.33333
692	2	4	9	0	3.17	3.64	3.08	3.45	2.91	3.42	2.67	3.38	3.3			1.8		1.16667	2
693	1	5	11	0	2.42	3.36	4	1.73	3.55	3	3	2.25	4.4	2.73684		2		2	2.16667
694	1	5	11	0	2.5	2.27	2.83	2.82	3.64	1.83	2.92	4.13	3.5	2.89474	1.08333	2.2	2.6	1.5	2.33333
695	1	5	10	0	4.25	2.91	3.33	2.64	2.82	2.67	2.42	3.88	4.4	2	1.16667	1.4		1.33333	1.33333
696	1	5	11	0	2.92	3.45	3.08	3.18	2.91	2.92	3	3.25	2.9	2	1.75	2.6		3	2.66667
697	1	5	11	0	4.08	4	2.5	3.45	4.45	3.5	3.17	4.63	3.1	2.31579	2.25	2		2.16667
698	1	5	11	0	3.33	4.27	4.33	3.36	2.36	2.42	2.33	3.25	3.9	2.57895	1.83333	2.3		1.83333	2.66667
699	1	5	11	0	2.25	2.18	4.17	1.73	2.09	1.75	2.33	4.25	5.1	2.78947	1.83333	2.1	2	1.5	2.66667
700	1	5	12	0	4.17	3.91	3.5	3.18	4.09	3.33	4.33	4	3.8	2.78947	1.5	2.6	3	1.5	2.5
701	1	5	10	0	2.42	2.73	3.83	2.91	3.36	3.25	2.83	3.38	3.1	2.78947	2.33333	2.2	2.4	2	3
702	1	5	11	0	2.75	2.73	3.92	2.64	2.64	2.75	2.17	4.63	4.5	3.15789	2.08333		3	2.16667	3.5
703	1	5	10	0	2.83	3.36	3.33	2.91	3.09	3.08	3	3.88	2.6		2	2.1	2.2	2.33333	2.33333
704	1	5	11	0	3.08	2.64	3	2.91	3.55	2.67	2.67	3.75	3.5	2.84211	1.25	1.5	1.8	1	2
705	1	5	10	0	3.08	3.27	3.83	3.27	2.64	3.08	3.25	3.38	3	2.31579	1.25	2	2	1.66667	2.16667
706	1	5	11	0	3.33	2.55	3.75	3.36	2.82	3.75	3.75	2.88	2.7	2.47368	1.25	1.6	2.4	1.33333	1.83333
707	1	5	12	0	3.17	3.73	2.75	2.64	3.18	2.75	1.92	4.88	4.4	3.10526	1.33333	2.1	3.8	1.5	2.5
708	1	5	11	0	3	3.73	5	3.18	4	4.17	4.08	3.75	3.7		1.5			1.33333	2
709	1	5	11	0	2	2.45	3.33	3.18	2.36	2.5	2.5	3.13	3	2.63158	1.66667		2	1.16667	2.5
710	1	5	11	0	2.08	2.55	3.17	3.09	2	2.25	2.17	3.5	2.8	3.31579	1	1.6		1	1.5
711	1	5	11	0	3.83	3.27	3.08	3.27	3.27	3.67	3.75	4.25	3.3	3.21053	1.41667	1.9	2.6	1.33333	1.33333
712	1	5	11	0	2.08	3	4.17	2.27	3	2.25	1.67	4.63	4.2		2.08333	2.4	2.4	1.66667	2.33333
713	1	5	11	0	2.5	2.45	3.42	2.09	2.27	2.58	2.67	4.75	3.5	2.63158	1.41667	1.7	1.8	1.16667	1.83333
714	2	5	10	0	3.33	2.27	3.5	3	2.64	2.92	3.42	4.13	4.3	2.21053	1.83333	2.3	1.8	1.5	1.83333
715	2	5	11	0	4.33	2.91	2	3.73	5.45	3.58	4.17	2.5	4.5	1.94737	1.33333	1.5	1.8	1.16667	1.16667
716	2	5	10	0	3	2.82	2.92	3.73	3.36	3.25	2.33	4.5	2.4	2.31579	1.25	2	1.8	1.16667	1.5
717	2	5	10	0	2.75	3.09	3.08	2.55	3.36	2.67	3.17	3.38	2.6	2.21053	1	1.6	2.2	1.33333	1.66667
718	2	5	10	0	2.92	2.36	2.92	1.91	2.18	1.92	2.33	3.5	3.2		1.75	1.4	1.8	1.66667	2
719	2	5	10	0	2.92	2.55	3.92	2.64	3.09	2.75	3.42	5.25	3.5	2.52632	1.16667		2.4	1.16667
720	2	5	12	0	3.25	2.91	2.75	3.82	2.73	2.83	3.08	4.25	3.8			2.3		1.16667
721	2	5	11	0	3.33	3.18	3.75	2.82	3.73	3.08	2.75	4.13	3.9	2.63158	1.58333	2	2.4	1.16667	2.33333
722	2	5	10	0	4.33	3.18	3.17	4	3.73	3.17	3.58	3.88	3.4	2.63158	1.41667	2.4	2.2	2	3
723	2	5	11	0	2.5	2.82	3.83	3.27	2.09	3	2.67	3.5	3.2	2.42105		1.6	1.6	1.33333	1.83333
724	2	5	11	0	3.5	2.45	2.83	2.45	3.09	2.67	2.25	3.38	3.1	3.21053	1.41667	1.8	2	1.5	2.5
725	2	5	11	0	3	3.18	2.75	3.09	3.45	3.25	3.17	3.25	4	3.26316	1.5		2.8	1.16667
726	2	5	10	0	2.75	2.64	3.25	2.73	3.27	2.67	2.92	3.88	3.3	3	1.33333	1.8	2	1.66667	2.5
727	2	5	11	0	3.67	2.73	3.25	3.82	3.45	3.75	3.67	4.38	3.1	2.31579	1.41667	1.7		1.83333	1.83333
728	2	5	10	0	3.67	3.45	3.75	3	2.09	2.58	2.75	3	3.1	2.52632	1.66667	2.3	1.8	2.33333	2.83333
729	2	5	10	0	3.58	2.36	3.08	3.18	1.91	3.42	2.67	4	4.1			2	3.2	1.83333	2.66667
730	2	5	11	0	2.5	2.45	2.75	2	3.45	2.42	2.25	5	3.5	3.42105	1.5	2.2	2.2	1.5	2.16667
731	2	5	11	0	2.17	3	3.08	3.45	3.18	3	3.33	3.25	2.6		1.41667	2.5	2.8	1.83333	2.33333
732	2	5	10	0	2.08	2.82	3.92	2.64	3.36	3	2.42	4.38	4.3	2.78947	1.25	1.7	2.6	1.16667	2
733	2	5	11	0	3.17	2.73	2.5	2.09	2.55	3.25	2.58	3.88	2		1.41667	1.5	1.2	1.33333	1.83333
734	2	5	10	0	3.67	3.45	3.5	4.45	3.73	3.75	3.67	3.25	3.4	2.47368	2.25		1.8	2.66667	2.83333
735	2	5	11	0	2.83	3.45	3.17	3.91	3.91	3.75	3.25	3.25	3.8	2.31579		2.2		2	2
736	2	5	11	0	2.67	2.64	3.17	3.45	2.55	3.58	3	3.5	2.1	2	1.25	1.3	2.2	1.16667	1.66667
737	2	5	10	0	3.17	3.18	3.67	3.55	3.18	3.17	3.33	3.75	3	2.05263	1.5	1.9	3	1.66667	2.16667
738	2	5	11	0	2.75	3.09	2.92	2.73	3.73	2.67	2.67	4.38	3.7	3.10526	1.16667	1.5	2.6	1.16667	2.16667
739	2	5	10	0	2.75	3.09	3.08	3.27	2.64	2.67	2.42	4.63	4.6	2.47368		1.6	1.8	1	1.83333
740	2	5	10	0	3.75	2.36	3.17	3.55	2.55	2.83	2.75	3.88	2.4	2.47368	2	1.8	2.4	1.83333
741	2	5	10	0	2.92	3.45	4	4.36	3.18	3.5	3.17	3.38	4.2	2.05263	1.25	1.7	1.8	1.33333	1.5
742	1	4	9	0	3	4	3.67	3.73	2.91	3.67	3.92	4.75	2.7	2.52632	2.08333	2		1.66667	2.33333
743	1	4	9	0	2.67	3.09	3.42	1.82	2.55	1.75	2.25	3.88	3.8	2.68421	1.66667	1.9	2.6	1.33333	2.33333
744	1	4	10	0	2.67	3.09	2.92	2	3.09	2.17	2.08	4.38	4.8	2.63158	1.33333	1.7	1.6	1.16667	1.66667
745	1	4	10	0	3	3.73	3.42	3.64	3.55	3.17	2.92	3.5	3			2.1	1.6	1.83333	2.5
746	1	4	9	0	1.83	2.36	2.92	2.18	3.55	2.17	1.75	3.25	3.8	2	1.41667	2	2.4	2	2.33333
747	1	4	9	0	5.08	3.36	3.83	2.73	4.36	3.33	3.75	4.5	3.7	2.05263	1.83333	1.8		2.16667
748	1	4	9	0										3.05263	1.25	1.7		1	1.83333
749	1	4	9	0	1.58	2.27	3.17	2.09	3.55	1.75	1.75	3.5	3.9	3.63158	1.25	2.5	2	2.16667	3.33333
750	1	4	9	0	4.17	3.09	2.42	2.82	4.09	2.75	3.42	4.38	3.6	2.31579	2.83333	2.3		2.33333	2.16667
751	1	4	9	0	3.08	3.36	4.08	3.18	2.64	3.42	3.17	3.75	4	3.15789	2.25	2.2	2.6	3	2.66667
752	1	4	9	0	2.17	2.36	3	2.73	2.82	1.83	1.83	3.5	3.8	3.42105	1	1.5	2.6	1.16667	2
753	1	4	9	0	2.75	3.82	3.33	2.45	3.09	2.75	2.83	3.63	3.8	3.36842	1.33333	2		1.5	2.66667
754	1	4	9	0	1.17	1.64	2.08	1.82	2.09	2	2	5	2.6	3.10526	2.58333	2.8	2.8	2.33333	3
755	1	4	8	0	3.08	3.36	3.58	3	3.18	3.42	3.25	4.5	4	2.15789	3.16667	2.7	2.2	3.5	2.5
756	1	4	10	0										2	2.25	2.3		1.83333	2
757	1	4	9	0	4.08	3.18	3.58	3.73	3.73	3.83	3.33	4	3.6	2.26316	1.75	1.8	1.8	2.16667	3
758	2	4	9	0	1.58	2.27	3.17	2.09	3.55	1.75	2.17	3.5	3.9	3.31579	1	1.6		1	2.33333
759	2	4	9	0	2.08	2.27	3.92	1.82	2.82	2.5	2.08	3.5	4.1	3.52632		1.7		1	2
760	2	4	9	0	2.75	2.73	3.42	2.73	4.27	2.08	1.83	4.5	4.3	3.26316	1	2		1	2
761	2	4	9	0	3.25	3.64	2.58	4	3	3	3.17	4.5	2.7		1.5	1.6	2.2	1.16667	1.5
762	2	4	9	0	2.67	3.55	3.42	2.82	3.64	2.08	2.75	2.88	3.7		3.08333	2	2	1.33333	1.33333
763	2	4	9	0	2.42	2.27	3	2.27	3.27	2.08	2.08	4.88	4.3	3.15789		2.2		1.5
764	2	4	9	0	1.83	2.64	3.83	2.64	2.82	1.92	2.42	4	3.4	1.63158		1.5	1.8	1.83333	1.66667
765	2	4	9	0	3.42	3.55	3.25	2.64	3.36	2.83	3.08	4.25	4.2	3.57895	1.25	1.4	2.8	1	2.66667
766	2	4	8	0	2.67	3.18	2.58	2.27	3.27	1.5	2.25	2.63	3.6	2.89474	1.5	2	1.6	1.5	2.5
767	2	4	9	0	2.25	3.18	2.92	2.09	2.55	2.08	2.33	3.75	3.8	3.57895	1.16667	1.4		2	2.83333
768	2	4	9	0	1.67	2.73	3.08	2.09	3.18	2.42	2.5	3.88	3.6	3.10526	1.16667	2.3		1.16667	2.33333
769	2	4	9	0	2.08	2.82	4.58	2.73	2.36	1.5	1.75	3.75	3.4	2.47368	1.75	1.9		1.66667	2.5
770	2	4	8	0	2.83	3.27	3.33	3.27	3.36	2.83	3.08	3.88	4	3.47368	1.16667	1.9	3.2	1.16667	2.5
771	2	4	10	0	2.58	3	3.17	2.82	3	3	2.42	3.63	3.5		1.16667	1.9	1.6	1.5	3
772	2	4	9	0										3.15789	1.16667	2.3		1	2
773	2	4	9	0	3.17	3.27	3.17	3.55	3.82	3.17	3.17	3.75	4.5	3.36842	1.25	1.3		1.16667	1.83333
774	2	4	9	0	3	3	2.92	3.45	2.45	2.58	3.08	2.63	1.8	3.26316	1.66667	2.6	1.2	1.83333	2.66667
775	2	4	9	0	2.67	1.64	3.25	2.18	2.09	2.25	2.17	4.13	3.7	2	1.16667		1.4	2.33333	2.66667
776	2	4	10	0	3.83	3.64	2.67	2.64	3.73	3.25	3.08	4.13	3.5	2.26316		1.7	1.6	1.66667	2.16667
777	2	4	9	0	3.25	2.82	2.92	2.36	3.09	2.58	3.08	3.5	3	2.42105	2.41667	1.8		1.66667	2
778	2	4	9	0	1.42	2.27	1.58	1.82	2	1.33	1.58	4.5	3.6	3.21053	1.58333	1.5		1	2.33333
779	2	4	10	0	2.67	2.55	3	2.45	3	2.58	2.33	4.75	3.8	2.15789		2.3	3.4	3.5	2.5
780	2	4	9	0										3.05263	1.41667	2.3	1.8	1.5	2.5
781	1	4	9	0	3.67	3	3.58	2.18	4.09	2.92	4	3.5	4.7	3		3.5	3.4	1.5	3.66667
782	1	4	9	0	3.25	2.73	4.08	3.73	3.73	2.08	2.67	3.88	2.6		1.83333	2.9	2		2.33333
783	1	4	9	0	2.92	3.18	3.83	2.45	2.27	3.08	3.08	3.75	4.4	2.73684	1.41667	1.8	2.8	1.16667
784	1	4	9	0	2.67	3.82	3.92	3.18	3.27	2.83	2.33	3.5	3.8	3.68421	1.16667	3.1		1.66667	1.66667
785	1	4	8	0	2.42	2.55	2	2.18	2.64	2.58	2.08	4.63	3.8	2.78947	1.58333	1.8	2.6		2.66667
786	1	4	8	0										2.05263		2	1.4	1.16667	1.83333
787	1	4	9	0	2.58	3.18	3.42	3.45	3.91	3.33	2.17	3.88	3.6	2.68421		2.3	2.6	1.16667	2.83333
788	1	4	9	0	3.92	3.64	4.67	3.55	4.45	3.42	3.42	4.25	4.8	2.21053	1.25	1.9		1.83333	2
789	1	4	9	0	3.92	4.18	3.67	3.82	3.27	4.33	4	3.75	3.9	2.84211	2.41667	3.1	1.4	2.83333	2.66667
790	1	4	9	0	1.5	3.82	4	3.27	3.18	4.17	2.58	3.38	4.4	2.31579	2.16667	2.5	1.6	2.83333	3.16667
791	1	4	9	0	3.75	3.82	2.83	2.82	3.18	3.33	4.08	3.75	2.7	3.05263	1.25	1.5	1.8	2.66667	2
792	1	4	9	0	3.92	3.36	4.67	2.82	3.36	3.08	2.67	4.63	3.9	2.63158	1.5	1.4		1.83333	1.16667
793	1	4	10	0	3.75	2.73	2.83	2.55	2.91	1.67	2.58	4.75	4.9	2.05263	1.41667	1.9	1.8	1	2
794	1	4	9	0	2.33	3	4.08	2.27	2.73	2.5	2.33	4.13	4.3	2.52632	1.5	1.3	3.2	2	1.66667
795	1	4	10	0										2.05263	1.66667	2.3	1.4	1.83333	1.16667
796	1	4	9	0	3	2.82	3.25	3.36	3	2.67	2.92	3.63	3		1.91667			2.33333	3.66667
797	1	4	9	0	3.75	2.36	2.83	2.27	3.82	2.42	2.58	3.88	4.5	2.68421	1.08333	1.5	1.8	1.33333	2.33333
798	1	4	10	0										2.68421			2.6	2.33333	1.66667
799	1	4	9	0	3.08	3.18	3.92	2.45	3.55	3.33	3.75	4.88	4.2	1.63158	3.58333		2.2	3.5	3.5
800	1	4	9	0	2.58	2.91	3	3.27	2.36	3.83	3.67	3.5	2.9	2.42105	1.75	1.8		2	2.5
801	1	4	11	0	3.83	3.55	4.17	3	4	3.33	2.92	4.25	3.9	2.42105	1.16667	1.8	2.6	2.16667	2.16667
802	1	4	9	0	2.75	2.73	3.42	2.45	3.09	3.08	2	3.38	2.5			1.7			1.83333
803	2	4	9	0	3.25	3.64	2.42	3.18	3.45	3.17	3.75	3.88	3.2	2.21053	1.5	2.1	3.2	1.16667	2.5
804	2	4	9	0	3.75	3.18	2.92	2.36	2.82	2.83	3	4.5	3.6	3.36842		2.4		1	2
805	2	4	9	0	3.25	2.82	3.5	2.55	3.45	2.5	2.83	4.25	4	3.31579	1.16667	1.9		1.16667	1.5
806	2	4	9	0	3.08	3.64	3.75	2.64	3.18	2.83	3.25	3.88	4.4	3.05263	1.66667	2.6		1.33333	2.5
807	2	4	9	0	2.92	3.36	3.92	2.27	2.45	2.75	2.08	3.38	3.1	3.10526	1.16667	1.7		1	1.33333
808	2	4	9	0	2.83	3.27	3.83	2.36	3.18	3	2.92	4.13	4	2.78947	1.08333	2	2.6	1.16667	2.5
809	2	4	9	0											1.08333	1.9	1.2	1.33333	2.16667
810	2	4	9	0	1.83	1.64	2.75	1.91	2.45	1.92	2.17	2.25	2.9		1	1.4	1.2	1.33333	1.83333
811	2	4	9	0	2.25	3.64	2.92	3	3.64	3.25	3.25	4.25	3.5
812	2	4	8	0	1.67	2.55	3.25	1.73	2.45	2.92	1.25	3.63	3.8	2.68421	1.25	2.5	1.6	2	2.16667
813	2	4	8	0	4.67	3.73	4.08	3	4.91	3.17	3.92	4.88	4.1	3.26316	1.08333	1.4		1.16667	2.16667
814	2	4	9	0	4.25	2.82	3.17	2.73	3.45	2.75	3.25	4.88	3.5	1.84211	1.58333	1.4		1	1.16667
815	2	4	9	0	2.67	3	4.25	3	3.45	2.5	2.67	4.13	3.7	2.57895	1.16667	1.8		1	1.33333
816	2	4	8	0	2	3	2.25	3.91	4.09	1.75	2.17	3.38	5.2	3	1.33333	1.6		1	1.83333
817	2	4	9	0	3.83	3.09	3.17	3.18	3.27	3.33	1.83	4.63	4.5		3	1.9	1.6	1.66667	2
818	2	4	9	0										3.78947	1.33333	2.5		1.16667	2
819	2	4	9	0	2.08	3.91	2.58	2.73	3	2.17	2.67	4.13	3.2	2.36842		2		1.16667	1.66667
820	2	4	9	0	1.75	3.55	5	3.73	2.64	2.92	3.5	3.38	5	2.10526	1.5	1.9	1.4	2	2.16667
821	1	4	9	0										1.63158	1.75	1.5		2	2.33333
822	1	4	8	0	3.08	3.55	3.42	3.45	3.55	3.17	3.42	3.63	3.6	3.63158	1.75	3.2	3.8	1.5	3.33333
823	1	4	9	0	2.75	3.45	2.92	3.45	1.91	2.58	3.17	2.5	1	2.89474	2.16667	2.3	1.8	2.66667	2.83333
824	1	4	10	0										3.05263	2	2.5	3	2	2.66667
825	1	4	9	0										2.94737	1	1.6	1.6	1	2.5
826	1	4	9	0										3.21053	1.58333	1.7		1.33333	2.83333
827	1	4	10	0	2.33	2.36	2.08	2.73	3.18	2.92	2.33	4.38	3.4
828	1	4	9	0	3.58	3.18	2.5	2.82	3.55	2.42	2.67	4.63	4.8	2.52632	1.5	2.3	2.2	1.66667	2.16667
829	1	4	9	0	3	3.36	3.25	3.09	4.09	3	3.58	4.13	2.9	2	2.25	1.6		2.16667	1.83333
830	1	4	9	0	3.92	2.91	3.25	3.18	2.82	2.83	3.17	4	2.7	2.05263		1.6	1.4	1.33333	2
831	1	4	9	0	2.92	3	3.42	2.64	1.73	2.58	3.42	4.63	3.3		2.08333			2.33333	2.66667
832	1	4	9	0	3	3.18	3.42	3.45	3.09	3.33	3.42	3.13	3.3	2.63158	2.25
833	1	4	9	0										2.15789	1.83333	2	1.6	2.33333
834	1	4	9	0										3	1.16667	2.1	3.6	1.16667	2.66667
835	1	4	9	0	2.75	3.82	4.25	2.82	4.18	3.08	2.5	4.5	5	2.26316	1.16667	1.3	3.2	1	2.16667
836	1	4	9	0											1.16667	1.7		1	1.33333
837	1	4	8	0	3.17	3.27	3.08	3.91	3	2.83	2.67	4.38	2.5	2.63158	2.08333	2.4	3.6	1.66667	2.16667
838	1	4	9	0	2.92	3.36	3.83	3.55	2.64	2.42	2.92	2.5	3.6	2.63158	1.91667	2.3		1.66667	2.66667
839	1	4	9	0											1.16667	1.5	2.6	2.16667	2.5
840	1	4	9	0											1.66667	1.7		1.5	2.5
841	1	4	9	0										2.78947	1.75	1.5	2	1	2.33333
842	2	4	9	0	3.42	2.73	3.58	2.82	3.36	2.67	2.58	3.25	4.1	2.15789	1.5			1.66667	2.16667
843	2	4	9	0	2.42	2.09	3.75	1.82	2.27	2.67	2.17	4.38	4.2	1.78947	3.66667	2.2	1.8	2.66667	3.16667
844	2	4	9	0	1.67	2.73	2.58	1.55	2.64	1.67	1.83	5	4.4	2.84211	1.58333	1.7	3	1.33333	2.16667
845	2	4	9	0	2.67	2.64	3.25	2.55	2.73	2.67	1.67	4	3.9	3.10526	1.41667	2.2		1.5	2
846	2	4	9	0	3.58	4.36	2.42	2.91	3.82	3.92	3.42	4.75	4.5	3.15789	1.58333	1.9		1.16667	2.16667
847	2	4	10	0	2.17	2.45	2.75	2.36	4	2.17	2.08	3.13	4.9
848	2	4	8	0	3.58	3.27	4.17	2.55	2.45	3	2.58	3.13	3.7	2	1.33333	1.7	1.6	1.33333	2
849	2	4	9	0	1.42	2.18	1.83	1.82	2.36	2.42	1.83	4.63	3.9	1.63158	1	1.3	1	1	1.16667
850	2	4	8	0										2.84211	1.58333	1.4	3.2	2
851	2	4	9	0	3.08	2.36	1.83	3.27	4.64	3	1.25	4.13	4	2.57895	1.5	1.6	3	1.66667	2.83333
852	2	4	9	0	2.58	2.55	2.5	2.64	3.27	2.58	2.25	3.63	4.4	2.57895	1.58333	1.6		1.66667	2.16667
853	2	4	9	0	3	3.64	2.83	2.73	4	3.58	3.58	4.5	4.5	1.21053	1.08333	1.1	1.4	2.16667	1.33333
854	2	4	8	0	2.5	2.09	2.25	2.09	5	2.92	2.58	5.75	3.6	2.15789		1.7	2.4	1.33333	2.16667
855	2	4	9	0	3.42	2.91	1.83	3.36	3.82	2.92	2.5	3.25	3	2.57895	1.16667	1.6		1.83333	1.83333
856	2	4	9	0	2.5	2.91	3.25	2.73	3.82	2.58	2.17	4	4	1.26316	1	1.3		1	1
857	2	4	9	0	2.33	2.64	3.75	2	3	2.33	2.33	4.5	4	2.26316	2.5	1.8	3	2.66667	3
858	2	4	10	0	3.83	3.18	3.42	3.18	3.64	3.92	3.42	4.13	3.8	2.42105	1.58333	1.7	1.8
859	2	4	8	0	3	3.73	2.92	2.73	3.09	3.25	2.25	4.5	3.9		1.25	1.8	1.8	1.66667
860	2	4	9	0	2.83	3.45	3.25	2.73	4.27	2.42	3.58	4.5	3.9	1.78947	1.91667	1.8	1.8	2.83333	2.66667
861	2	4	9	0											2.75	2.9		2.16667	3
862	2	4	8	0	2.33	2.91	3.92	2.45	3.36	2.42	2.25	4.5	4.3	1.84211	1.25	1.7		1.33333	2.16667
863	2	4	8	0	4.92	3.91	1.5	3.64	3.82	4.08	4.67	5.63	3.1	2.78947	1.16667	1.3		1.33333	1.66667
864	2	4	9	0	2.58	2.27	3.25	3.27	2.45	3.33	2.75	4.75	4.3	3.42105	2	2.5		1.16667	3
865	2	4	9	0	3.42	2.91	3.17	2.73	4.09	2.75	2.58	3.63	4.5	2	1	1.7	2.2	1.33333	1.83333
866	2	4	9	0	2.42	2.09	2.42	2.09	4.36	2.42	2.83	5.38	3.8		2.83333	2.6	2.4	1.66667	2.83333
867	2	4	8	0	3.5	3.73	3.17	3.36	3.18	4.33	3.5	3.88	3.3	3.42105	1	1.6	2.6	1	2.33333
868	2	4	9	0										1.94737	2.08333	1.7	2.2	1.83333	1.66667
869	2	4	9	0										2.63158	1.75	2	2.4	1.66667	2
870	1	5	10	0	1.58	2.64	1.92	2.09	3	2.5	2.08	3.13	3.8	3.21053	1.16667	1.6		1	2.16667
871	1	5	10	0	3.83	3.36	3.92	3.18	4.27	3.5	3.33	4.75	4.5	3.31579	1.25	1.8	3.2	1	2.5
872	1	5	10	0	3	4.09	3.75	3.36	2.36	3.25	4	4.13	1.8	3.10526	1	1.6		1.33333	1.66667
873	1	5	10	0	2.5	2.27	3.42	2.55	3.09	2.25	2	3.75	4.7	2.68421	1.08333	1.3		1.5	2.16667
874	1	5	10	0	3.58	3.82	3.67	4.36	3.09	2.75	4.08	3	3.2	3.10526	1.75	1.9	2.6	1	2
875	1	5	10	0	2.58	3.18	3.42	3	3.82	2.58	2.33	3.75	4.2	2.31579	2.83333	1.9		2.66667	3.33333
876	1	5	10	0	3.83	3.36	2	2.36	3.55	2.17	2.83	4.63	4.5
877	1	5	10	0	2.42	3.55	2.75	1.73	2.91	2.58	1.92	3.5	4.2	3.42105	1.66667			1.83333	2.33333
878	1	5	10	0	3	3.36	2.5	2.73	3.73	2.75	2.67	5.75	3.6			2.7		2.16667
879	1	5	10	0	2.42	2.73	2.92	3.55	3.27	3.67	2.58	4.75	4.4	2.42105	1	1.3		1.66667	1.66667
880	1	5	10	0	3.08	3.36	3.58	3.18	4.09	3.42	3.33	4.88	4.4	2.73684	1.58333	1.9			2.33333
881	1	5	10	0	4.17	3.55	1.75	2.64	4.18	1.67	3.5	4.75	4.2	2.05263	2.66667	2		2.66667	3
882	1	5	10	0	2.75	3.09	3.42	3.91	2.55	3.58	3.75	3.25	2.1		1.08333	1.6		1.16667	2.66667
883	1	5	10	0	2.92	4.18	3.58	3.09	4.73	3.25	3.75	3.75	5.1	2.89474	1.33333	1.9		1.83333	1.33333
884	1	5	10	0	2.67	2.64	2.83	2.82	3.09	2.5	2.83	3.75	3.8	3		2.2		1	2.16667
885	1	5	10	0	3.75	3.45	3.5	2.82	3.91	2.42	2.83	3.38	3.8	3.36842	1.08333			1.5	3
886	1	5	10	0	3.42	2.73	3.58	3.27	3.18	3	3.08	3.63	3.1	2.78947	1.33333	1.8	2.8	1.5	2.83333
887	1	5	10	0	3.33	3.45	3.08	3.27	4	2.92	2.92	4.13	3.5	2.89474	1	1.8			2
888	1	5	11	0	3.25	2.82	4.33	3.09	3	3.42	3.5	3.25	2.9	2.63158	1.33333	3.1	3.2	1.5	3
889	1	5	10	0										2.89474	1.66667	2.2	2.2	2.33333	3
890	1	5	11	0	2.67	3.09	3.83	4	2.91	3.67	2.83	4.25	3.3	3.52632		2.5	2	1.16667	1.83333
891	1	5	10	0	3.08	2.91	4	2.55	4	2.33	2.42	4.25	3.3	2.63158	1.16667	1.7		1.5	1.5
892	1	5	10	0	2.83	3.09	2.17	3	3.27	3.83	3	4	3	2.47368	1.25	1.7	1.8	1.5	1.83333
893	1	5	10	0	3.42	3.82	2.58	2.73	3.09	2.92	2.67	4.38	4.9	3.15789	1.41667	2.6		1.66667	2.5
894	1	5	10	0	2.75	3.27	4.42	2.64	2.18	2.25	1.5	3.25	3	3	1.5	2.3		1.16667	2.33333
895	1	5	10	0	2.5	3.45	3.92	3.45	2.64	2.92	3.33	2.5	2.7	3.05263	2.16667	2.4		1.66667	2.16667
896	1	5	9	0	2.75	2.73	3	2.45	2.36	2.67	3	3.5	2.9	3.47368	1.58333	3.3		1.33333	3.16667
897	2	5	9	0										2.89474	1.83333	2.3		2.16667	2.83333
898	2	5	10	0	2.42	3.45	2.25	2.82	3.45	2.33	2.92	4.25	4
899	2	5	9	0	3.08	2.36	4.58	3.36	3.18	2.83	2.08	4	4.4	1.84211	1	1.2	1.8	1	1.83333
900	2	5	10	0	2.42	2.64	2.92	2.45	2.27	2.5	2.33	4	2.8	1.78947	1.16667	1.5	1.4	1.33333	2
901	2	5	10	0	3.58	3.18	3.42	2	2.45	2.75	3.08	3	3.2	3.68421	1.41667	1.5		1.5	1.83333
902	2	5	10	0	3.25	3.27	3.25	2.36	2.82	2.42	2.58	3.75	4	3.68421	1	1.5	1	1	1.33333
903	2	5	10	0	2.92	2.64	3	3.55	2.45	2.08	3.17	4.13	2.1	2.21053	1.5	1.5	2.6	1.5	2.16667
904	2	5	10	0	3	3.91	3.67	3	3.18	3.08	3.25	4	3.5			1.6		1	1.5
905	2	5	10	0	2.42	3	3.33	2.55	3.18	2.83	2.5	4.38	3.3	2.94737		1.9	1.6	1.5	2.33333
906	2	5	9	0	1.75	2.64	4.33	2.91	3.36	2.75	2.58	4.38	4.4	2	1.58333		2.8	1.83333	2.5
907	2	5	9	0	1.75	2	2.58	1.73	1.91	2.33	2.58	3.13	4.2	3.31579	1	2		1	1.66667
908	2	5	10	0	2.25	3	4	2.09	3.82	2.67	3.58	4	3.6	2.73684	1	1.8		1	1.83333
909	2	5	10	0	3.17	3.36	4.17	3	2.45	3.5	2.75	4.63	3.3	2.05263	1.41667	1.7	1	1.33333
910	2	5	10	0	2.92	2.36	3.25	2.36	2.09	2.33	2.83	5.13	3.4	3	1.16667	1.6		1	1.33333
911	2	5	10	0	2.17	2.09	2.75	1.82	2.91	2.17	2.17	3.88	3.4	3.36842	1	2		1.33333	2.16667
912	2	5	10	0	2.17	2.45	3	2.64	2.27	2.58	2.25	4.25	4				1.8	1	2
913	2	5	10	0	2.75	3.27	2.5	2.36	2.73	1.92	2.67	3.5	2.9	2	1.33333	2		1.33333	2.16667
914	2	5	10	0	2.5	2.55	3.17	1.73	1.82	2.17	1.75	3.13	3	2.63158	1.16667	1.9	2	1.33333	1.5
915	2	5	11	0	1.92	2.45	2.42	1.18	1.27	1.5	1.08	4.75	3	1.78947	1.66667	2.1	1.6	2	2.33333
916	2	5	10	0	3.17	2.73	3.67	2.82	3.27	2.5	2.83	3	3.4		1	1.6	3	1	2.83333
917	2	5	10	0	1.92	2.27	3.08	2.64	1.73	2.75	2	3.38	3.8	3.36842	1	2	4	1	1.66667
918	2	5	10	0										2.31579		1.5	2	1.33333	2.33333
919	2	5	10	0	2.08	2.64	2.33	1.91	2.73	2.08	1.92	4.38	3.4	3.52632	1	2.8	1	1	2.5
920	2	5	10	0	3.5	3.82	5	2.55	2.91	3.17	3.58	4	4.5	3.42105	1.16667	1.9		1	1.66667
921	1	5	9	0	3.17	3.64	3.33	2.45	4.18	3.33	2.5	3.86	3.2	1.63158	2	1.7	1.4	1.5	2.5
922	1	5	10	0	3.33	3.18	3.67	3.18	3.64	3.08	3.25	4	4		1.66667	1.5	2.8	1	1.83333
923	1	5	9	0											1.5	2.5		1.66667	2.5
924	1	5	9	0	1.67	2.55	3.67	3.09	2.27	2.33	2.25	4	2.6	2.26316	2	2.5		2
925	1	5	11	0	1.75	2.82	3.5	3	2	2.33	2.75	4	2.2	1.47368	1.25	1.4		1.5	1
926	1	5	10	0	3.58	3.45	4.08	2.82	4.09	3.42	3.58	3.75	4.8		1.75	1.5	2	1.16667	1.83333
927	1	5	10	0	2.92	3.36	4.33	3	4	3.25	3.25	3.75	4	3.21053		1.9		1	2.5
928	1	5	10	0	2.75	3.27	2.83	2.09	3.45	3.25	2.83	4.75	3.7	2.42105	3.83333	2.8		3.16667	3.16667
929	1	5	10	0	1.83	2.73	3.08	2.45	2.91	2.25	2.25	4.5	3.8	3.21053	1.25	2	2.6	1.33333	1.66667
930	1	5	10	0	2.33	2.36	3.25	1.36	3.27	2.58	1.75	3.13	3.8	2.94737	1.25	2.1	1.2	1.66667	2.66667
931	1	5	10	0	3.58	3.73	3.25	3.55	3.73	4.17	3.58	3.88	2.3	1.78947	1.58333	1.7	2.2	1.83333	1.83333
932	1	5	10	0	3	2.91	3.42	3.36	3	2.67	2.92	3	2.9	1.68421		2		1.33333	1.33333
933	1	5	10	0	3	3.09	2.92	3.27	2.82	2.92	2.42	3.38	2.4	2.68421	2	2.2	1.2	2	2.66667
934	1	5	10	0	3.17	3.45	3.33	2	2.09	2.92	2.67	3.38	3		1.08333	1.6		1.16667	1.83333
935	1	5	11	0	2.17	4.18	2.67	2.27	2.64	2.92	2.33	3.38	3.4	2.63158	1.41667	1.9	1	1.5	2.33333
936	1	5	9	0	4.08	3.09	3.25	3.73	3.73	2.58	3	4.5	3	2.15789	2.25	2.7	2.4	3	3.16667
937	1	5	11	0	3.17	3.18	2.92	3	3.45	2.67	2.83	3.88	2.3		1.5	2.3		1.16667	1.66667
938	1	5	10	0	3.67	3.64	3.33	3.36	4	4	3.33	2.88	3.7		2.08333	2	1	2
939	1	5	10	0	3.75	3.45	2.33	2.64	3.36	3.58	2.83	3.63	3.6	2.63158	2.16667	1.9		2.16667	2.16667
940	1	5	10	0	3.75	3	3.5	2.73	4	3.83	2.83	4.13	3.5		2.25	2.1	1.6		1.66667
941	1	5	10	0	2.92	3	3.25	2.55	3.45	2.92	3	4.25	3.7	1.94737	2.16667	1.9		1.83333	3
942	1	5	10	0	3	2.82	5.25	3.18	3.91	3.5	3.5	4.75	4.2	2.84211	1.58333	2.2		1.5	2.83333
943	1	5	11	0	1.67	1.91	2.25	1.27	2.18	1.67	1.5	3.88	3.3	2.52632	1.08333	1.5	2.4	1.16667	2
944	1	5	10	0	4.25	3.45	2	2.64	4.09	3.17	3.58	4.5	3.9		1.33333	2		1.33333	2.66667
945	1	5	10	0	3.42	3.36	3.25	2.64	3.09	3.08	2.83	4.75	4.1	2.42105		1.5		1.33333	1.5
946	1	5	10	0											1.16667	1.7		1.83333	1.16667
947	1	5	9	0	3.33	3.27	4.33	2.82	3.91	3.42	2.75	4.75	4.7	2.73684	1	1.4		1.16667	2.16667
948	2	5	10	0	3.5	3.55	3.42	2.91	4.27	3.25	3.92	4.38	4.8	2.78947	1.41667	1.7		1.16667	1.66667
949	2	5	9	0	3.58	3.36	3.83	2.09	3.73	2.25	3.42	4.75	4.9	2.94737	1.25	2.4		1.83333
950	2	5	11	0	2	2.36	3.33	3.18	2	2.25	1.83	3.5	3.5	3.05263	1.16667		2.2	1.33333	2
951	2	5	10	0	1.75	1.82	2.25	1.82	1.91	1.75	1	4.25	3.7	3.36842	1.08333	2.1		1.5	2.5
952	2	5	10	0	3.58	2.36	2.58	2.36	3.82	2.5	2.5	4.5	4.3	2.78947	1.16667	1.4	1.4	1	1.33333
953	2	5	10	0	2.5	3.09	4.08	3.27	2.64	3	3.25	3.75	3	3	1.25	1.6	1.6	1.5	2
954	2	5	9	0	3.25	2.73	3.5	2.73	4.45	2.67	3	3.75	4.3		1.33333	1.8		2	1.66667
955	2	5	10	0	3.08	3.55	3.5	3.27	2.45	3.58	2.75	3	3.5	1.63158	1.5	1.5	1.2	1	1.66667
956	2	5	10	0	2.83	3.91	3.75	2.73	3.64	2.08	2.08	4.63	4	3.47368	1.16667	1.8		1.33333	2
957	2	5	10	0	2.25	3	2.58	3.09	3.91	2.17	1.92	4.25	4.3	1.42105	2.75	1.5	1	3	2.33333
958	2	5	10	0												1.3	1.8	1.16667
959	2	5	10	0										2.31579	1	1.4	2	1.33333	2
960	2	5	10	0	2.33	2.45	3.25	3.18	2.91	2.75	2.25	4.38	3.3		1.25	1.9		2.5	2.16667
961	2	5	10	0	2.08	2.82	3.42	2.09	1.73	3.17	1.58	3.63	2.8	2.84211	1	2.1	2	1	1.66667
962	2	5	10	0	2.17	3.27	2	2.64	3.45	3.33	2.08	3.88	5	2.89474	1.33333	1.8		1.33333	1.83333
963	2	5	9	0	4.17	3.73	2.67	2.55	3.64	2.75	3.08	4.38	4.5	2.73684	1.08333	1.7		1.33333	1.83333
964	2	5	11	0	3.33	2.82	4.08	2.09	2.91	2.58	2.42	3.75	4.3	3.21053	1.08333	1.6	2.8	1.16667	1.5
965	2	5	10	0	3.25	3.36	3.25	2	2.45	2.75	2.42	4.5	3.7		1.08333		2.6	1.16667	1.33333
966	2	5	10	0	3.67	3.82	2.75	3.36	4.73	1.58	3.33	3	4.3		1.16667	1.8	1.8	1.83333	2.16667
967	2	5	10	0	2.25	2.45	3.42	2.36	2.27	2.25	1.58	3.75	3.6	2.84211	1.08333	1.3		1	1.66667
968	2	5	11	0	3.17	3.55	3.25	2.73	3.18	2.75	2.5	4.25	3.7	2.21053	1.91667		1		2.33333
969	2	5	10	0	2.08	2.27	2.58	2.36	3.64	2.42	2.08	3.25	3.8	2.84211	1.25	1.7		1.33333	1.66667
970	2	5	10	0	2.5	2.27	2.83	2.09	3.27	2.25	1.83	4	5	3.05263	1.08333	1.6	1.2	1	1.16667
971	2	5	10	0	2	2.82	4.17	3.45	3	3.75	2.17	4.88	5.1	2.73684	2.75	2.5		3.33333	3
972	2	5	10	0	3.08	2.82	3.92	3.55	4.36	3.25	2.75	4.13	4.4		2	1.6	1.4	1.83333	2
973	2	5	9	0	4.17	3.45	4	3	3.27	3.42	3.42	3.25	4.4	2.21053	2.75	2.1		2.66667	2.16667
974	1	5	9	0	4	4.09	3.42	3.18	4.09	3.42	3.75	3.25	3.7	2.05263	1.75	1.6		1.66667	1.5
975	1	5	10	0										2.36842	1.33333	1.8	1.8	1.5	1.83333
976	1	5	10	0	3.08	3.18	4	2.91	2.45	3.25	3	3.38	3.6	1.73684	1.5	1.2	2	1.33333	1.33333
977	1	5	10	0	2.83	3.73	4.42	3.55	4.27	3.42	4.08	5	4.7	2.10526	2.25	1.7	2	2	2.5
978	1	5	10	0	2.25	2.91	3.08	2.36	3.27	2.67	2.58	3.75	3.8	1.94737	1.41667			1.33333	1.16667
979	1	5	10	0	3.75	3.45	3.33	3.27	2.36	3	3.33	4.25	4.8
980	1	5	10	0	3.58	2.82	4.83	2.91	3.55	3.08	2.75	4.25	4.7	2.10526	1.16667	1.6	1.6	1.5	1.5
981	1	5	10	0	3.17	3.18	3.33	3.73	2.82	3.67	3.25	3.5	2.4		1.33333	1.2	1.8	1.33333	1.83333
982	1	5	12	0	2.92	2.27	2	2.27	3.09	1.92	2.08	4.25	2.9	2.78947	1.83333	2.2	2.8	1.16667	2.83333
983	1	5	10	0	3.08	3.18	3.33	2.64	2.45	2.67	2.83	3	2.9		1.25	2.4	2.4	1	2
984	1	5	10	0	1.83	1.55	2.58	3.45	1.82	2.08	1.67	4.25	2.2	3.31579	1.16667	2.1		1	2.16667
985	1	5	10	0	2.67	2.55	3.17	3.36	3	3.83	2.5	4.63	3.6	1.94737	4	2.5	1	3.5	2.5
986	1	5	10	0	2.33	2.55	2.92	2.55	2.27	2.08	2.33	3.13	3.4	1.73684		1.6	1.4	1	1.33333
987	1	5	11	0										1.52632	3.83333	2.7	1	2.83333	3
988	1	5	11	0	3.33	3	3.25	2.91	3.36	3.17	3.08	4	3	3.26316	1.58333	2.3	1.8	1.5	2.33333
989	1	5	10	0	2.67	3.09	4	1.82	3.82	1.58	1.08	4.25	4.7			1.2	2.2	1.5	1.16667
990	1	5	10	0	3.5	3.64	2.67	2.27	2.64	2.58	2.5	4.13	2.5			2.8		1.33333	1.83333
991	1	5	10	0	2.08	2.91	3.42	3	3.55	2.42	3	4.25	4.4	2.63158		2.5		2.16667	2.33333
992	1	5	10	0	2.83	4	3.5	3.55	1.91	3.5	3.92	3.63	3.1	2.36842		2.6	1	1.83333	2.83333
993	1	5	9	0	2.25	2.64	2.25	2.27	1.64	2.17	1.67	3.25	2.7	1.89474			1.6	1.83333	1.83333
994	1	5	10	0	1.58	2.73	4.92	2.09	2.36	2.17	1.83	3.63	3.9	2.84211	1.25	1.5	2	1.33333	2.16667
995	1	5	10	0	3.17	3.55	3.25	4	2.27	4	3	2.5	2.3	2.73684	1.41667	2		1.33333	1.5
996	1	5	10	0	2	2.36	3.17	1.45	3.27	1.5	1.5	4.13	4.7	2.63158	1.41667	1.2	1.2	1	1.66667
997	1	5	10	0	3.08	2.91	3.92	2.45	3.27	3.58	2.25	3.63	3	3.42105	1.25	2.3	3.4	1.5	2.33333
998	1	5	9	0	1.58	1.55	1.5	2.64	1.27	1.58	1	3.88	2.4	3	2	1.9	3.4	1.66667	2.5
999	1	5	10	0	4.25	3.45	4.17	4	3.27	3.08	4	4.5	3.3	2.78947	1.08333	1.6		1.16667	1.5
1000	1	5	9	0	3.58	3.64	3.42	2.73	3.82	2.83	3.08	5	3.3		1.58333	1.7	1.2	1.16667	1.83333
1001	1	5	10	0	3.08	3	3.92	1.45	1.73	3	2.92	4.13	4.4	2.84211	1.16667	1.8	2.6	1.16667	2.16667
1002	1	5	10	0										2.31579	1.83333	1.9	1.6		2.16667
1003	1	5	10	0	3.25	3	3.42	2.36	3.09	2.83	3	4.25	3.6	2.26316	1.33333	2		1.16667	2
1004	1	5	10	0	2.75	2.82	3.58	3.45	1.82	2.67	3	3.63	2.1	2.31579	1.5	1.8	2	1.33333	1.5
1005	2	5	10	0	3	3.55	4.25	3.09	3.36	2.92	3.67	4.38	3.7	2	1.66667	2.4		2.16667	2.5
1006	2	5	10	0	2	2.45	3	2.82	2.82	3	2.08	3.5	4	1	1	1		1	1
1007	2	5	10	0	3.58	3.27	2.5	2.82	3.27	3	3.17	4.13	4.4	3.57895		1.8		1.66667	2.83333
1008	2	5	11	0	1.42	1.82	3.17	1.18	1.55	1.83	1.33	5.13	3.6	3.10526	1	1.5	2.2	1	1.66667
1009	2	5	10	0	2.25	2.64	2.25	2.27	1.64	2.17	1.67	3.25	2.7	2.89474		2	2.4	1.16667	2.66667
1010	2	5	10	0	3.17	3.45	3.08	2.82	4.73	2.83	1.67	4.25	4.5	2.94737	1.25	1.6	3.2	1.16667	2.16667
1011	2	5	10	0	2	2.27	3.75	3	2.18	3	2.25	3.13	2.5		1.16667	1.5		1.5	2
1012	2	5	10	0	3.25	3.64	3.75	3	3.45	3.83	3.5	2.88	3.3	2.36842	1	1.5	1.8	1.33333	2
1013	2	5	10	0	3	3.18	3.5	3.73	1.91	3.25	2.83	3.75	4.7		1.5	2.3	2.6	1.66667	2.33333
1014	2	5	10	0	2.5	2.64	3.08	2.73	2.18	2.33	2.08	3.75	3	2.21053	1.25	1.7		1.66667	2
1015	2	5	11	0	3.67	2.82	3.42	3.36	3.18	3.17	2.92	3.88	3.5	2.26316	2.08333		2.2	1.66667	2.33333
1016	2	5	9	0	2.25	2.36	2.58	3.09	3.18	2.33	2.33	2.63	3.9		1.25	1.5	1.6	1.5	1.66667
1017	2	5	9	0										2.10526		1.5	2	1.33333	2
1018	2	5	10	0	3.17	3.45	4.25	2.82	3.82	3.25	2.83	4.38	4.4	2.52632	1	1.5	1.8	1.16667	1.33333
1019	2	5	10	0	2.08	2.91	3.83	2.55	3.27	2.42	2.08	4.63	4.1	2	1.41667	1.9	1.8	1.5	1.66667
1020	2	5	10	0	3.08	2.55	3.67	2.55	3.18	3.33	4.17	3.5	3.9	2.84211			1	1	1.83333
1021	2	5	10	0	2.75	2.73	4.08	2.82	3.18	2.58	2.33	4.38	4	2.89474	1.25	1.5	1.4	1	1.5
1022	2	5	10	0	1.58	3.36	2.75	1.64	1.64	1.83	1.58	5.25	3.9	2.63158	1.41667	1.9	2	1.33333	1.83333
1023	2	5	10	0	2.25	2.45	3.25	2.09	1.82	2.83	1.67	3.88	3.1	1.94737	1.16667	1.7		1.33333	2
1024	2	5	10	0	2.25	2.36	2.25	2.45	2.73	2.67	1.58	4	4.2	1.94737	1.58333		2.8	1.5	1.5
1025	2	5	10	0	3	2.82	3.33	3.18	2.36	3.08	3.17	4	3.3		1.25	2		1.16667	1.66667
1026	2	5	10	0	2.08	1.91	2.83	1.45	1.36	2.08	1.5	3.38	3.3	2.36842	1.91667	2.1		1.66667	2.16667
1027	1	4	11	0	3.83	4.27	3.25	3.55	3.64	3.92	3.08	4.13	2.8	3.10526	1.58333	2.1		1.33333	1.66667
1028	1	4	8	0	3.5	3.73	3.83	3.55	3.45	3.17	3.92	4.25	3.8	3	1.25	1.8	2.6	1.33333	2.33333
1029	1	4	9	0	2.5	3	5.58	2.73	2.64	3.58	3.42	4.13	3.6	1.89474	2.08333	1.9	2.2	2.66667	2.83333
1030	1	4	9	0	3	2.91	4.33	2.82	3.55	2.75	2.67	4.38	3.6	1.52632	1.08333	1.5	1.4	1	1
1031	1	4	8	0	1.5	2.18	3.5	1.91	2.27	3.17	1.75	3.75	3.2	2.31579	1.58333		2.4	1.5	1.66667
1032	1	4	10	0	3.58	3.27	3.42	3.91	4.27	3.33	4.67	5.25	3.3	2.36842	1.33333	1.9	2	1.33333	1.5
1033	1	4	10	0	2	3	3.5	3.18	2.36	3	2.42	4.5	3.6	3	2.25	2.5	2.8	1	2.5
1034	1	4	9	0	2.25	2.45	4.08	2.45	1.91	3.5	1.83	2.63	1.4	2.15789	1.58333	1.3	2.4	1.16667	1.5
1035	1	4	10	0	2.83	3.36	3.5	2.91	3.82	2.42	2.75	4.75	4.6	2.36842	2.75		2	1.83333	2.5
1036	1	4	9	0	3.33	3.82	3.42	3.09	3.09	3	3.58	3.13	2.5		1.25	1.8	1.6	1.5	1.66667
1037	1	4	9	0	3	3.36	3.08	3	3.55	3.58	3.75	3.75	2.1	2.68421	1.83333	1.9	2.2	1.66667	2.16667
1038	1	4	10	0	3.08	3.09	3.42	2.45	2.36	2.58	2.42	4.13	3.1	2.57895	1.5	2.8	2.8	1.5
1039	1	4	9	0	3.25	3.45	3.25	3.27	4.45	3.25	3.25	3.63	4.2	2.42105	1.33333	1.7	2.8	1.66667	2.33333
1040	1	4	9	0	3.83	3.64	4.08	3.73	3.45	3.08	3.83	3.5	3.9	1.26316			1.8	1.83333	1.5
1041	1	4	11	0	3.08	3.36	2.83	3.27	2.64	2.92	3.08	4	2.7	2.26316	2.66667	2	2.2	2.5	2.5
1042	1	4	9	0	3.67	3.82	5.25	3.82	5	4	4.33	3.25	4	1.89474	1.66667	1.8	1.2	1.66667	2.5
1043	1	4	9	0	1.75	3.36	3.67	3.27	2	1.92	2.5	3.25	2.6	2.57895	1	1.7		1.66667	2.16667
1044	1	4	9	0	3.25	3.55	3.25	3.91	3.09	3.33	3.08	3	3	1.68421	1.83333	2	2	1.33333	2.33333
1045	2	4	9	0	2.17	2.91	4.17	2.18	3.64	2.42	2.08	4.13	5	2	1.33333	1.5	1.6	1.66667	1.33333
1046	2	4	9	0	2.75	2.27	3	2.91	3.36	2.42	2	2.75	4.2	2.89474	1.33333	2.6	1.8	1.5	2.83333
1047	2	4	10	0	3.67	3.27	3.33	4.18	2.45	3.33	3	3	2.3	2.26316		1.5	2.2	1.5	2.5
1048	2	4	9	0	3.5	3	4	3.18	3.27	3.25	2.25	4.25	4.8	2.36842	1.33333	1.6	2.6	1	1.5
1049	2	4	8	0	2.67	3.45	3.5	3.09	4.18	2.5	2.92	3.5	3.7	3.26316	1.08333	2.3	1.6	1.83333	3.16667
1050	2	4	10	0	2.42	2.55	3.92	3.27	3.55	3.17	3.83	4.25	2.3		1.33333	1.3		1	2.5
1051	2	4	8	0	3.17	3.73	3.25	3.36	3.82	3.75	3	3.63	4.2	2.31579	1.25	1.9	1.8	1.16667	1.66667
1052	2	4	9	0	3.25	2.91	2.25	2.45	4	3	2.92	4.88	5		1.33333	1.3	2.2	1.16667	2.16667
1053	2	4	9	0	2.83	2.73	3.25	2.73	3.64	2.92	2.67	4.13	4.6	3.31579	1.08333	1.4	2.6		1.83333
1054	2	4	8	0	2.75	2.91	2.58	3.36	2.64	2.42	2.25	4.63	2.3	2.10526	1.5	1.7	2	1.66667	1.66667
1055	2	4	9	0	2.58	3.45	3.75	3.27	2.27	3.33	2.58	3	2.4		1.33333		1.6		2.66667
1056	2	4	8	0	2.75	4	3.92	2.91	3.18	3.08	3.92	4	3.8	2.78947	2.66667	2.7	3.2	2.5	2.66667
1057	2	4	10	0	3	2.18	4.58	2.64	3.36	2.25	2.33	4.63	3.6	3.05263	1.16667	1.3	1.6	1.16667	2.5
1058	2	4	9	0	3.17	2.73	3.67	2.73	3.09	2.75	2.17	4.75	3.4	1.94737		1.4		1.66667	1.5
1059	2	4	8	0	3.42	3.18	3.75	3.09	3.73	2.83	2.75	4.75	3.3	2.89474		1.6		1.83333	2.33333
1060	2	4	9	0	2.75	3.55	3.92	2.64	2.45	3.17	3.58	3	3.1	3.47368	1.08333	1.6		1	2
1061	2	4	10	0	2.83	3.45	3.08	3.27	2.55	3.33	4.33	3.25	3.3	2.42105	2.83333	2.8	2.2	1.66667	2.83333
1062	2	4	9	0	2.58	3.36	4.33	3.18	2.18	3	2.25	5	2.5	2.21053	1	1.6	2.6	1.33333	2.5
1063	2	4	9	0	2.08	3.55	3.5	4.36	2.73	3.08	2.75	2.5	2.2	2.21053	1.08333	1.3		1.16667	2.16667
1064	2	4	9	0	1.42	2.64	4.33	1.73	2.18	2	2.08	4.38	3.8	2.57895	2.91667	2.3	2.8	2.16667	2.5
1065	2	4	8	0	3.33	2.82	3.67	2.18	3.64	2.67	3.08	4.75	3.1	2.21053	2.66667	2.2	2.6	2	1.83333
1066	2	4	9	0	2.67	2.18	3.5	2.36	3.09	2.92	1.92	3.5	3.7	2.26316	1	2.3	1.8	1	2.16667
1067	2	4	9	0	2.83	3.45	2.67	3.45	2.91	2.33	3.25	3	2	2.05263	1.08333	1.5	2.2	1	1.5
1068	2	4	9	0	2.17	3.09	3.08	3.18	2.91	2.83	2.58	3.63	2.5	1.78947	1.75	1.7	1.6	1.83333	1.83333
1069	2	4	9	0	2.83	3.09	4	3.36	3.55	2.67	3.25	4.25	4	2.47368	2.5	2.8	2.4	2.33333	1.83333
1070	1	4	9	0	3.33	3.91	3.58	4.36	2.64	3.25	3.75	2.5	2.1	2.63158	2.41667	2.5	2.4	3.66667	3.5
1071	1	4	10	0	3.83	3.45	3.25	3.55	3.27	3.33	3.92	4	4.3	2.73684	1.16667	2.7	2.6	1.5	2.33333
1072	1	4	9	0	3.08	3.18	3.92	3.64	3	3.33	3.33	4.38	3.4	2.68421	1.5	2.2	2	1.33333
1073	1	4	10	0	3.5	3.36	3.5	3.18	3.82	3.5	3.5	3.13	3		2	2.4	2.4	2.16667	2.33333
1074	1	4	9	0	3.5	3.45	3.83	3.09	4.09	3.83	4.25	5	4.3	2.89474	1.75	2.2	2.6	1.5	3
1075	1	4	10	0	2.5	2.64	3.25	2.91	2.18	2.92	2.33	3	3.1	2.78947	1.33333	2.2	1.6	2	2.16667
1076	1	4	10	0	3.08	3.45	3.42	3.91	3.36	3.92	3.83	3	3.1	2.36842	1.58333	2	2.2	1.83333	2.16667
1077	1	4	10	0	2.17	2.91	2.67	2.18	2.27	2.42	3.33	4	3.7		1.5	1.7		1.83333	2.66667
1078	1	4	9	0	3.25	2.64	3.5	3.45	3	3.08	3.67	3.75	2.4	2.47368	2	1.7	2.6	1.5	1.66667
1079	1	4	9	0	2.75	3.82	3.25	3.09	2	2.5	2.5	3	2.8	3.10526	2	2.4	2.8	1.5	2
1080	1	4	9	0	2.92	3.09	3.83	3.27	3	3.92	3.17	3.63	3.1	2.57895	2.5	2.8	1.6	4	3.5
1081	1	4	9	0	4.42	3.45	3.5	3.64	2.27	4.08	3.92	4.13	2
1082	1	4	9	0	2.58	3.82	3	3.45	2.55	2.67	2.42	4	3.1		1	1.5	2.2	1	1.83333
1083	1	4	10	0	4.17	2.73	3.33	3.09	3.45	3.33	3.33	3.5	4	2.26316	1.91667	1.4		1.5	2
1084	1	4	10	0	3.33	2.91	2.67	2.91	3.73	2.83	2.5	3.38	3	2.84211	1.16667	1.9	1.6	1.16667	2.33333
1085	1	4	9	0	3.92	2.91	3.25	3.36	2.82	4	3.25	3.88	2.5	2.31579	2	2.5	2.8	1.66667	2.5
1086	1	4	9	0	2.58	3.09	3.25	2.73	2.91	2.67	3.25	3.38	3.2	1.73684	1.58333	1.7	1.4	1	2
1087	2	4	9	0	2.92	2.82	3.33	3.18	3.18	2.58	2	4.75	3.5	2.63158	1.41667	2.1	1.2	1	2.16667
1088	2	4	9	0	3.08	2.36	2.92	2.82	3.45	2.58	3	3.13	4.5	1.57895	1.33333	1.8		1	1.83333
1089	2	4	8	0	3.58	3.73	3.58	2.64	3.18	3	3.42	3.63	3.9	1.89474	1.16667	1.6	1.4	1	1.83333
1090	2	4	9	0	1.67	2.91	3.75	2.73	2.55	2.92	2	3.63	2.5	2.47368	1.83333	1.6	2	1.66667	1.66667
1091	2	4	10	0
1092	2	4	8	0	2.5	3.27	3.5	3.36	3.73	2.75	2.92	4.5	3.3	2		1.3	2	1	1.66667
1093	2	4	9	0	3.5	3.64	3.67	2.91	4	2.83	3.17	3.88	3.4	3.05263	1.25	1.7	3	1.66667	1.5
1094	2	4	10	0										2.10526	2.08333	1.8	2.4	2	2.5
1095	2	4	10	0	1.92	3.64	4.42	3.45	2.82	2.83	2.92	4.38	4	2.73684	1.16667	2.6		1.5	2.33333
1096	2	4	9	0	3.42	3.36	3.83	3.45	3.64	3.58	3.25	4.25	2.9	2.63158	2.41667	2	3.2	2.5	3
1097	2	4	9	0	2.5	3.18	4.67	3.45	3	3.83	2.33	4.5	3.7	1.94737	1.08333	1.6	1.6	1.16667	1.66667
1098	2	4	8	0	3.08	2.55	3.92	1.82	1.64	1.67	2.17	4.38	4.2	3.36842	1.08333	2.3	1.6	1.16667	2.66667
1099	2	4	10	0	2.58	2.73	2.08	1.91	1.36	1.83	2.08	3.63	2.1
1100	2	4	9	0	2.92	3.91	3.58	2.64	3.18	3	3.58	3.75	3.6	2.63158	1.91667	1.7	3	1.66667	3
1101	2	4	9	0	2.75	3.55	3.92	3	3.09	3.42	3.08	3.38	4.6			1.7	1.8	1.5	2.16667
1102	2	4	10	0	3.08	2.82	4.25	2.91	3.91	3.33	2.67	4.5	4.2	3	1.66667		2.6	1.83333	1.66667
1103	2	4	11	0	3.17	3	3.25	3.55	3.73	3.58	3.33	3.63	4			1.5	1.4	2	1.5
1104	2	4	9	0	2.42	2.73	3.25	2.27	1.91	2.08	1.42	4.38	4.5	2.63158	1.16667	2	1.8	1	2.16667
1105	2	4	9	0	1.75	2.64	4.42	3.73	1.82	3	3.17	4.38	1.9	2.84211	1.08333	1.6	2.2	1	2
1106	2	4	9	0	2.83	2.18	3.92	1.64	2	2.67	1.92	4.13	2.9	2.84211	1.25	2.2	1.6	1.16667	2
1107	2	4	9	0	3.58	3.64	3.25	3.36	3.36	3.92	3.17	3.63	3	2.31579	1.91667	2.2	2	2.16667	2
1108	2	4	9	0	2.75	2.82	3.58	3.64	2.82	3.58	3.58	2.5	3.1	2.73684		1.9	2.4	1	2.16667
1109	1	5	12	0	4.17	2.82	3.42	2.45	3.55	2	2.5	5.25	3.4	2.21053	1.41667	2.3	1.4	1.83333	2.16667
1110	1	5	10	0	3	3.27	3.42	2.73	3	3	3.83	4.38	2.6	2.26316	1.41667	1.3	1.6	1.33333	1.83333
1111	1	5	9	0	3	3	3.5	2.36	3.36	1.92	1.75	4.38	4		1.16667	1.8	2	1.5	3
1112	1	5	11	0	3.08	3.27	4.5	4	4.55	3.92	3.58	3.38	4.1	2.68421	1.91667	2.1	2.4	1.83333	3.5
1113	1	5	11	0	4.58	3.91	3.5	2.82	3.27	2.83	3.83	4.88	3.2	2.52632	2.25	2.8		2.66667	3.83333
1114	1	5	11	0	2.25	2.55	3.5	2.82	3.27	3.08	2.17	4.5	4	2	1.58333	1.6	1	1.83333	2.16667
1115	1	5	11	0	3.17	2.55	4.83	2.55	2.55	3.33	2.5	4.38	3.1	2.57895	1.91667	2.2	2	1.66667	2.66667
1116	1	5	10	0	3.42	3.27	3.42	4.18	2.91	3	3.08	4	3.4	2.78947	1.25	1.7	2.2	1	1.83333
1117	1	5	11	0	2.67	3.18	3.75	2.55	3.55	3.58	2.75	3.38	3.9	2.21053	2.41667	2.1		2	2.83333
1118	1	5	11	0	3.33	3.55	2.83	4.09	2.73	3.17	3.75	2.88	2.7	2.78947	1.66667	1.9	2.4	1.16667	1.5
1119	1	5	10	0	2.75	2.91	2.58	3.36	2.64	2.42	2.25	4.63	2.3	3.47368	1.33333	2.6	3	1.16667	2.16667
1120	1	5	10	0	1.83	1.91	2.92	1.73	2.18	2.08	1.75	3.75	2.2	2.89474	1	1.7		1	1.33333
1121	1	5	10	0	2.83	3.45	3.42	3	2.45	3.58	2.67	2.75	3.3	2.73684	3.08333	2.3	2	2.66667	3.16667
1122	1	5	11	0	4.25	3.64	4.5	3.36	3.91	3.25	2.25	5	4.7	2.47368	1.08333	2	1.6	1.16667	2
1123	1	5	10	0	2.83	2.73	3.67	2.55	3.64	4	2.67	4.63	4.1	2.10526	1.5	2	1.2	1.33333	2
1124	1	5	10	0	2.42	3.36	2.92	2.18	2.36	2.42	3.25	3.75	2.9	2.36842	1.83333	1.9	2	2.16667	2.66667
1125	1	5	10	0	2.5	3.27	3.33	4	3.36	2.5	2.67	4.5	3.8	2.63158	1.41667	2.1		1.66667	2.33333
1126	1	5	10	0	3.25	3.64	3.5	4.27	2.73	4.25	3.83	2.63	1.8	1.42105	1.91667	1.5	1.2	1.5	2.16667
1127	1	5	10	0	2.58	3.18	3.67	2.82	3	3.5	2.75	4.13	3.7	1.73684	1.83333	2	1.8	1.83333	1.83333
1128	1	5	10	0	3.42	3	3.75	3.36	2.55	2.75	2.83	3	2.6	2.52632	1.25	2.1	2.2	1.5	2.66667
1129	1	5	11	0	2.75	3.36	3.58	3.09	3.36	4.42	3.42	3.5	2.7	2.36842	2.16667	2.3	2.4	2.16667	2.5
1130	1	5	10	0	2.92	3.36	3.67	3.73	2.64	3.5	3.25	3.38	2.7	1.89474	2		1.6	1.33333	2
1131	1	5	12	0	3.17	3.73	3.5	3.82	2.82	3.83	3.58	3.5	3	3.52632	2	2.4		2	3.16667
1132	1	5	11	0	3.83	3.55	4.33	3.55	3.55	3.5	3.5	4.63	2.9	2.36842	1.91667	2.2	2.4	1.66667	2.66667
1133	2	5	12	0	3.17	3.55	4.08	3.91	3	3.33	3.08	3.88	3.6	2.42105	2.58333		2.6	2.5
1134	2	5	10	0	2.92	3.18	3.67	3.45	5	2.5	3.92	4.13	3.5	2.42105	1.25	2.4	1	2.5	2
1135	2	5	11	0	2.5	3.45	3.75	3.36	3.45	3.25	1.92	4	4.2	2.15789	2.41667	2	3	1.83333	2.5
1136	2	5	10	0	1.58	2	2	1.55	1.73	1.42	1	3.63	3.9			3.1	2.6	1.5	3
1137	2	5	11	0	1.67	3	4.08	3.27	2	3.08	2.58	4.63	3.3	2.89474	2.08333		3.2	2	2.5
1138	2	5	11	0	3.5	3.64	4	3.18	2.64	3	4	3.38	2.9	2.57895	1.41667	1.5	2	1.33333	1.5
1139	2	5	9	0	2.5	2.82	4.17	3.27	4	3.33	2.83	4.38	3.6	1.47368	2	1.6	1	1.33333	2.16667
1140	2	5	10	0	2.42	3	3.5	4.27	2.09	3.5	3.25	4	2	2.42105	1.41667	1.9	2.2	1.66667	2.16667
1141	2	5	11	0	3	3	3.67	2.73	2.27	3.83	3	4.5	3.4	2.84211	1.33333	1.6	2	1.16667	2.16667
1142	2	5	10	0	1.83	3.09	3.08	1.18	2.18	1.42	1.75	3.25	4.4	2	1	2.1	2.6		1.33333
1143	2	5	10	0	2.5	2	3.25	1.91	1.91	2.17	1.58	3.88	2.3	3.05263	1.25	1.7	1	1	1.33333
1144	2	5	11	0	3.5	3.45	2.67	3	3.36	3.33	3.08	4.25	4	2.94737	2.66667	2.4	2.6	2.83333	3
1145	2	5	11	0	2.92	3	3.67	2.91	4.18	3.83	2.58	3.5	3.4	2.89474			2.4	2.66667	2.5
1146	2	5	10	0	3.67	4.09	3.75	3.73	2.18	2.92	3.58	2.75	3.2	2.21053	1.41667	1.7	2.2	1.66667	1.83333
1147	2	5	10	0	3.17	3.45	2.42	3.27	3.55	3.75	3.5	3.38	4.2	1.73684	1.5	1.3	1.4	1.33333	1.5
1148	2	5	11	0	4.08	3.64	3.83	4.09	4.36	3.5	4	4.88	4.1	2.47368	2.41667	2.4	2.6	2.33333	2
1149	2	5	10	0	2.92	2.82	2.33	2.64	3	2.58	2.17	4.25	2.6	1.89474	1.25	1.6	1.2	1.16667	1.83333
1150	2	5	10	0	2.92	2.18	3.67	2.36	3	2.67	1.58	4.63	3	2.42105	1.41667	1.8	2.6	1.5	2
1151	2	5	10	0	2.83	2.18	4.08	3.55	2.82	2.92	3.08	4.13	3.6	1.68421	1.25	1.4	1.4	1	2.16667
1152	1	5	12	0										2.26316	2.33333	2.3	1.6	2.33333	2.66667
1153	1	5	12	0	4.08	3.36	3.17	3.55	3.55	4	4.25	3.38	3.7		2.25	2
1154	1	5	12	0	3.83	3.18	4.33	3.55	3.55	3.83	3.5	4.38	3.1	1.57895	1.41667	1.6	2.4	1.66667	1.83333
1155	1	5	12	0	2.83	3.91	3.67	4.73	2.64	3.67	3	3.25	3.2	2.63158	2.41667	1.9	2.4	2.5	2.33333
1156	1	5	11	0	2.75	3.27	3.25	3.91	2	3.33	3.42	3.13	1.6	1.31579	1.58333	1.3	1.4	1.33333	1.33333
1157	1	5	11	0	3.25	3.55	3.92	3.18	3.64	3.25	3.33	3.5	3.5	2.31579	1.08333		1.8	1.33333	1.5
1158	1	5	10	0	3	4.09	3.67	3.91	3.09	3.83	3.42	2.63	3.1	3.57895	2.41667	3	3	3	3.83333
1159	1	5	10	0	2.92	3.73	4.25	3.45	3	3.17	2.83	4.75	3.6	2.78947	1.41667	1.7	2.2	1.33333	2.83333
1160	1	5	11	0	1.5	3.18	4.17	2.55	1.55	3.42	3.5	5.75	2.8	2.47368	1.33333	2.2		1.83333	3.16667
1161	1	5	11	0	3.58	2.91	3.67	3.45	3.73	3.67	3.17	4.25	3.3	1.21053	1.83333	1.5	1.4	1.16667	1.5
1162	1	5	10	0	3.42	3.09	2.67	3.27	3.91	3.58	2.92	4.25	4.2	1.89474	2	1.9	2	1.83333	1.83333
1163	1	5	11	0	3.67	3.18	3.33	3.09	3.45	2.75	2.83	4.5	4	3.42105	1.33333	2.6		1.83333	2.16667
1164	1	5	11	0	3.17	3.09	4	3.64	3.09	2.83	3.83	4.63	3.5	2.05263	1.5		1.4	2.33333
1165	1	5	11	0	2.33	2.91	3.67	3.45	2.73	3.17	2.08	4	3.7	2.89474		1.7	2.2	1.33333	2.5
1166	1	5	10	0	3.67	3.82	3.08	2.55	3.36	4.5	3.42	3	3.5	2.94737	1	1.4	3.6	1	2.83333
1167	1	5	10	0										2.21053	2.75	1.6		2.16667	2.66667
1168	1	5	11	0	2.92	2.91	2.67	2.73	2.73	3	3.33	4	3	2.84211	1.25	1.7	2.2	1	2.16667
1169	1	5	9	0	3.25	3.09	4.42	3.36	3.55	3.17	2.5	4.75	3.6	2.26316	2.58333	2.4	1.6	2.16667	3.5
1170	2	5	11	0	2.67	3.18	3.5	4.36	2.45	3.67	3.58	2.5	2	2.42105	1.16667	1.5	2.4	1	1.33333
1171	2	5	10	0	3.17	3.18	3.42	3.09	3.36	3.5	3.25	3.75	3.4	2.31579	1.58333	1.9	2.2	2.33333	2.16667
1172	2	5	10	0	2	3.45	3.5	4.18	2.27	4.75	3.58	3.5	2			1.6	1.8	1.16667	2.83333
1173	2	5	9	0	2.42	2.27	3	2.27	2.55	2	1.42	4.13	2.4	2.47368	2.25	2.1	1.8	2	2.33333
1174	2	5	11	0	3	3.45	3	3.27	4.09	3.17	3	4	3.4	2.73684	2.25	2.2	2.4	2.33333
1175	2	5	9	0	2.75	2.64	3.67	3	3.27	3	2.25	4.63	4.4	2.42105	1.33333	1.4	1.6	1.33333	1.83333
1176	2	5	12	0	3.83	2.18	4.5	2.64	2.55	3.33	2.42	4.38	2.9	2.78947	1.08333	1.5	1.6	1.33333	2.33333
1177	2	5	11	0												1.3	1.6		1.33333
1178	2	5	9	0	3.08	3.18	3.58	3	3.64	3.33	3.58	2.75	3.3	2.73684	1.5	1.4	3	1.33333	2.16667
1179	2	5	10	0	3.17	3.27	3.5	3.09	4.91	3	3.08	3.63	4.5	2.78947	1.58333	1.4	3.4	1.33333	1.83333
1180	2	5	10	0	3.33	3.55	3.5	4.09	3	3.67	3.67	2.75	2.6	1.68421	1.16667	1.7	1.4		2
1181	2	5	11	0	3.58	3.64	3.5	3.45	3.55	2.58	3.25	4.5	3.9	2.52632	2.08333	2.1	2.8	1.83333	3
1182	2	5	9	0	2.42	3.27	3.5	4.36	2.82	3.17	2.92	3.63	3.8	1.63158	1.66667	1.6	1.8	1.5	1.33333
1183	2	5	12	0										1.94737	1.91667	2.1	1.6	1.66667	1.83333
1184	2	5	9	0	3	2.91	4.42	2.82	3.55	2.75	2.67	4.38	3.6	2.47368	1.16667	1.5	1.6	1.16667	2.5
1185	2	5	12	0										2.36842	1.66667	1.7	2	2	2.33333
1186	2	5	10	0	2.5	3.09	3.67	3	2.82	3.17	2.92	4.63	2.4	2.52632	1	1.5	1.6	1.16667	2.16667
1187	2	5	11	0	2.83	4.36	3.5	4.09	4.27	2.83	4.5	4.25	4.4		1.08333		2	1.5	1.16667
1188	2	5	12	0	4.08	3.64	3.83	4.09	4.36	3.5	4	4.88	4.1	2.31579	1.83333	2	1.8	2	2.16667
1189	2	5	11	0	2.17	2.09	4.67	2.73	2.82	2.92	2	1.63	3.2	2.36842	1.08333	2.2	1.8	1.16667	2.16667
1190	2	5	11	0										2.21053	2.25	2.4	2.2	2.16667	2.66667
1191	1	4	9	0	2.67	1.82	3	1.55	2.73	2.17	2.83	4.25	3.6	2.21053	2.16667	1.7	2	2.16667	2.66667
1192	1	4	9	0	3	2.64	3.92	2.91	4.36	2.92	2	4.88	3.9		1.66667	2.2		1.66667	1.83333
1193	1	4	9	0	3.42	3.27	3.25	3.91	3.09	2.83	2.25	3.25	2.5		1.25	2.7	2	1.33333	2.33333
1194	1	4	11	0										2.57895	1.33333	1.8		1.66667	2.16667
1195	1	4	9	0	2.92	2.73	3.75	3.27	4.55	3.17	2.75	4.75	4.5	2.89474	1.16667	1.4		1.33333	2
1196	1	4	9	0	3.08	3.18	4.25	3.27	3.18	4.17	3.58	3.75	2.5		1.91667	2.2	1.6	1.33333	1.83333
1197	1	4	10	0	3.5	3.55	3.25	2.82	3.27	3.25	3.08	4.5	3.3		1.16667	1.3		1.33333	2
1198	1	4	9	0	3	3.91	3.08	3.64	3	3.25	3.42	3.38	3.6	2.68421		2.2	2.2	1.66667	2.33333
1199	1	4	9	0	2.25	2.82	3.58	2.18	2.82	2.67	2.08	4	4.3	2.47368	1.83333	1.9		1.83333	2.66667
1200	1	4	9	0	3.17	2.91	3.75	3.18	2.18	2.33	3.42	5.5	4.3		1.08333	1.7	2.8	1	1.33333
1201	1	4	9	0	2.5	4	3.83	2.73	3	2.83	2.25	3.88	4.2	2.84211				1	2
1202	1	4	9	0	3.25	2.82	3.58	3.55	1.73	3.92	3.83	4.75	2.6	1.73684	1.16667	1.3	1.8	1.5	1.83333
1203	1	4	9	0	1.92	1.55	3.58	1.27	1.45	2.08	1.67	5.38	3.3	2.42105	1.58333	2.5	1.2	1.16667	2.83333
1204	1	4	9	0	3.92	3.45	3.17	2.55	3.45	2.25	2.92	4.88	3.7	2.10526	1.08333	1.4	1.4	1	2.16667
1205	1	4	9	0	4.25	3.55	3.25	2.45	3.45	2.58	2.92	4.63	3.2	2.73684	2	2.5	2.6	2	2.5
1206	1	4	10	0										2.26316	2.33333	1.7		1.66667	2.16667
1207	1	4	9	0	2.17	3.64	4.25	2.91	4	2.58	2.25	3.88	4	3.42105	1.41667	2.3		1.16667	2
1208	1	4	11	0	2.42	2.82	3.42	3.73	2.91	3.25	2.25	3.25	3	2.57895		2.9		1.33333	2.16667
1209	1	4	9	0	3.42	4.18	3	3.36	3.82	3.75	2.92	5.13	4.1	3.63158	1	1.3	1.6	1	2.5
1210	1	4	9	0	3.17	2.91	3	1.73	3.36	2.25	1.83	4.5	3.8	3.31579	1.66667	1.5	2	2	2.66667
1211	1	4	9	0	2.92	2	2	1.36	2.27	1.83	1.5	4.5	4	3.05263	1	1.3		1	1.16667
1212	1	4	9	0	2.83	3.09	2.67	2.91	2.09	3.08	2.83	4.38	2.5		1.16667	1.6	1.6	1.5	2.16667
1213	1	4	9	0	2.83	3.36	3.42	3.27	2.36	2.58	2.92	3.38	2.8	3.21053	1.16667	2.3	2.2	1.16667	2.5
1214	1	4	9	0	2.5	2.64	4	3.73	2.18	3.42	3.25	3.5	2.7	2.68421	1.91667	2.7	1.8	1.5	2.5
1215	1	4	9	0	3.92	1.27	3.5	1.73	3.36	1.58	2.17	5.75	4.6	3.21053	1.41667	1.7	1.8	1.33333	2.83333
1216	1	4	9	0	3.08	2.64	3.58	3.18	3.36	3.17	3.42	3.75	3.2	3.42105	1.91667	2.2	2.6	1.5	2.66667
1217	1	4	9	0	2.42	1.91	3.42	2.55	2.18	2.5	3.67	5.13	3.4	3.42105	1.91667	2.3	2.2	3	3.66667
1218	1	4	8	0	2.33	3.36	3.08	2.91	3.64	2.42	1.83	4.75	3	2.78947		2.3	2.8	1	2.5
1219	1	4	9	0	2.5	3.91	4.25	3.36	2.64	3.92	2.33	3.63	3.1			2.3	2.6	1.5	2
1220	1	4	9	0										2.47368	1.16667	1.9		1.66667	1.83333
1221	1	4	9	0	4	3.64	3.92	3.64	3.36	2.5	3.58	3.63	3.9	2.63158	1.41667	2	2.2	1.33333	1.83333
1222	1	4	9	0	3.33	2.55	3.75	2.27	2.64	1.83	2.67	3.63	3.2	2.36842	1.58333	2.6	3	1	2.5
1223	1	4	9	0	3.67	3.27	3.33	2.64	3.36	2.67	2.83	4.25	3.7		1.5	2.1		1.66667	2.16667
1224	1	4	10	0	2.92	3.55	4	2.82	4.27	3	2.83	3.75	4.7	2.84211	1.33333	1.6	1.4	1.66667	2.33333
1225	1	4	9	0	3.42	3.27	3.25	2.82	3.18	2.25	3.08	3.63	4.4	2.63158	2.41667	2.2	2.2	2.5	2.33333
1226	1	4	9	0	4.08	4.27	2.67	2.91	4.27	3.58	2.58	3	3	3.26316	1.58333	2.1		2.5	2.5
1227	2	4	10	0	4.67	4.45	2.5	3.27	5.18	4	3.5	4.75	2.5	2.47368	2.66667	2.6	2.4	2.33333	3
1228	2	4	9	0	2.5	2.18	3.25	2.73	3.55	2.83	1.67	3.75	4.4	3.52632	1	1.5		1	1.83333
1229	2	4	9	0	2.42	2.82	4.33	2.27	2.18	3.17	2	2.75	3.3	2.36842	1.66667	2	1.6	1.33333	2.66667
1230	2	4	10	0	2.92	3.55	3.75	3.09	2.91	3.58	3.92	4.38	4	3.05263	2.58333		3.2	3.16667	2.5
1231	2	4	9	0	1.58	2.09	2	1.45	1.45	1.92	1.17	3.5	3.8	3.21053	1.08333	1.9		1	2.66667
1232	2	4	10	0	4.58	3.73	1.92	3.27	4.36	3.08	3	5.88	5	2.36842	1.66667	2.1	2	1.33333	2.33333
1233	2	4	10	0	3.67	3.09	2.92	3.18	3.45	3.25	4	2.5	2.8	1.52632	3	3.3	1.6	2.66667	3.5
1234	2	4	9	0	2.83	2.64	2.92	2.82	3.09	2.5	2.83	3.13	3.4	3.21053		1.7	1.6	1.16667	2.83333
1235	2	4	9	0	3	2.64	3	2.64	3.55	2.17	2.33	3.63	3.7	3.84211	1	2.7	3	1.33333	1.16667
1236	2	4	9	0	3	3.55	3.5	4.27	1.91	3.5	3.17	2.25	1.4	2.78947	1.5	1.5	3.2	1.66667	1.66667
1237	2	4	9	0	2.42	2.18	3.92	3.45	1.73	3.42	2.75	3.38	2.7	3.15789		1.4		1.33333	1.66667
1238	2	4	9	0	3.33	2.91	3.5	3.09	4.64	2.5	2.42	4.13	3.9	2	2.08333	2.5	2	3	2.33333
1239	2	4	9	0	3.67	2.64	4.33	3.09	4.55	3.17	4.25	4	2.5	2.52632	1.41667	2.1	2.2	1.16667	2.33333
1240	2	4	9	0	3.33	3.55	2.92	3.45	3.27	3.17	3.42	3.5	2.8	2.36842	1.33333	1.7	3.2	1.5	2.83333
1241	2	4	9	0	2	3	4.75	2.18	2.18	2.75	1.75	5.25	4.4	2.68421	2.16667	2.6		1.5	1.66667
1242	2	4	9	0	3.25	3.45	3.17	3.45	4.64	2.67	2.5	4.13	4.1	3.52632	1.33333	2.7	2.4	1	2.5
1243	2	4	8	0	2.42	2.36	4.17	2.18	2	1.67	1.33	3.38	2.3	3	1.25	1.5		1	1.66667
1244	2	4	9	0	3.08	3.91	3.83	3.18	3.18	3.67	3.75	3.38	3.1	2.15789	1.33333	1.7	2	1.16667	1.66667
1245	2	4	9	0	3.25	3.82	5.17	2.55	2.55	2.83	3.08	4.88	2.5	2.63158	2.25		3.2	2.33333	2.5
1246	2	4	9	0	3.42	3.18	3.58	3.36	3.36	3.33	3.08	3.38	3.2	2.15789	1.5	1.9	1.4	1.5	3.33333
1247	1	4	9	0	1.75	2.55	3.75	2	2.55	2.75	2	4	3.8	2.42105		1.7			2.83333
1248	1	4	10	0										3.52632	1.75	2.9	1.8	2	2.5
1249	1	4	9	0	3.17	3.64	3.33	3.09	3.55	3.75	3.42	3.63	3.9	3.26316	1.41667	2.4		2.16667	2
1250	1	4	9	0	3.33	2.91	3	2	2.27	2.83	2.83	4.5	3.7	2	1.08333	1.9	1.4	1.33333	1.5
1251	1	4	9	0	1.42	2.45	2.42	2.64	1.55	2.17	1.92	4.5	3.5	1.68421	1.41667	1.1	1.4	1.33333	1.66667
1252	1	4	9	0	2.17	3	2.33	2.36	3	2.83	2.33	3.5	3.6	3.15789	1.91667	2.9	3.4	2	3.33333
1253	1	4	9	0	3.17	2.55	2	2.45	3	2.67	2.83	3.63	3.1	2.84211	1.08333	1.7	1.6	1.16667	1.66667
1254	1	4	10	0										1.52632		1.9		2.5	2.5
1255	1	4	9	0	2	3.09	3.25	2.64	1.73	2.08	2.25	2.38	3.1	2.47368	1.58333	1.8	1.6	1.66667	2
1256	1	4	9	0	3.17	2.91	3.33	3.36	2.09	3	3.17	2.5	2.7	2.68421	1.5	2.4	2.2	1.16667	1.83333
1257	1	4	9	0	3	2.45	3.83	2.82	1.82	3	2.08	5.13	3.1	2.94737	1.58333	1.9		1.5	2.33333
1258	1	4	9	0	3	3.73	3.67	4.18	2.73	3.42	3.17	3.38	2.4	1.68421	1.5	1.3		1.33333	1.66667
1259	1	4	11	0	2.67	3.36	4.42	3.09	3.91	2.92	2.17	3	4.1	2.52632	2.08333		2.6	2	2.66667
1260	1	4	9	0	3.25	3.09	3.08	2.91	4.27	2.75	3.17	4.13	3.5		2.91667	2.7			2.33333
1261	1	4	8	0	3.83	3.18	3.25	3.36	3.55	4.08	3.67	4.25	3.5	2.36842	1.66667	2	1.6	1.66667	2.5
1262	1	4	10	0	2.75	2.91	2.67	1.91	3	2.42	2.42	4.75	3.7		1.75	2.1	2.2	1.5	2.33333
1263	1	4	9	0	2.83	2.91	2.67	2	3	2.5	2.5	4.63	3.7	2.68421	1.75	1.8	1.4	1.5	2
1264	1	4	9	0	3.08	3	2.75	3	3.45	3.17	2	4.75	3.9		1.75	2.1		1.33333	2.16667
1265	1	4	9	0	2.42	2.82	4.67	2	2.73	3	2.92	4.38	2.7	1.84211	1.41667	1.6	1.6	1.16667	2.33333
1266	1	4	9	0										2.26316	1.83333	2.5	2	2.33333	2.66667
1267	1	4	10	0	2	2.82	3.83	1.73	2.45	2.42	2	4	3.1	2.73684	1.5	1.8		1.66667	2.16667
1268	1	4	9	0	4.25	2.64	3.08	2.82	3.82	3	1.67	5.13	4.6	2.57895	1.41667	2.2	2	1	2
1269	1	4	10	0	1.83	2.73	3	2	1.45	2.67	1.83	3.13	2.8				1.4		1.66667
1270	1	4	9	0	1.92	2.55	2.83	2.64	2.09	2.25	1.5	3.75	1.8	2.05263	1.75	1.7	2.6	1.16667
1271	1	4	9	0	3.17	3	4.17	3.45	3.73	3.75	3.25	4.88	4.9	3.21053	1.41667	2.3	2	1.16667	2.33333
1272	1	4	9	0	1.42	2.45	2.42	2.64	1.55	2.17	1.92	4.5	3.5	2.47368	1.91667	2.5	2	2	2.33333
1273	1	4	9	0	3.25	2.91	3.17	3.09	3.55	2.92	2.67	4	4.1	1.84211	2	2.1		2.16667	2.16667
1274	1	4	10	0	3.33	3.64	3.17	3	4.09	3.25	2.92	4.25	5.5	2.57895	1.83333	1.7	1.6	1.66667	2.33333
1275	1	4	9	0	2.25	3.27	2.67	3.91	2.18	2.83	2.83	1.75	1.5		1.5	1.8	1.8	1.33333	2
1276	1	4	9	0	3.42	3.45	3.67	3	3.55	2.83	3.08	3.75	3.6	2.73684	1.16667	1.5	1.4	1.16667	2
1277	1	4	9	0	2.58	3.18	3.83	2.27	2.18	3.67	2.08	4.63	3.3	3.05263	1.33333	2.2	3	1.33333	2.5
1278	1	4	10	0	2.75	3	3.67	3.73	3.73	3.17	3.33	4.38	4.4
1279	1	4	9	0	2.92	2.36	3.5	4.09	2.09	2.5	3.17	4	2.8	3.52632	2	3	3.4	2.5	4
1280	1	4	9	0	3.17	2.09	3.08	2.18	2.27	1.92	1.67	4.38	3.8	2.21053	1.08333	2.1		1.16667	1.83333
1281	1	4	10	0	3.17	3.45	2.08	3	4	2.92	3.5	4.75	3.1		1.5	1.8	1.2	1.16667	1.5
1282	2	4	8	0	2.67	2.91	3.5	3	2.73	2.33	2.08	3.38	3.9	1.68421	1.16667	1.2	1.8	1	1.66667
1283	2	4	9	0	2.58	2.73	2.58	2.45	4.09	2.5	2	4.75	4.3	3.31579	1.08333	1.9	2	1.33333	2.16667
1284	2	4	9	0	3.25	2.36	2.83	3.82	2.91	3.67	2.75	3.75	4.8	2.73684	1.91667	2.6	2.2	2	2.83333
1285	2	4	9	0	2.67	3.18	2.58	3.09	3.27	2.75	2.83	4.25	3.8	2.15789	1.16667	1.5	1.8	1.16667
1286	2	4	9	0	2	2.73	3.17	3.55	2.18	2.17	2.17	3.13	2.6		2	2.9	3.2	2.16667	3.33333
1287	2	4	9	0	2.83	2.64	3.58	3.73	1.91	3	3.17	2.88	1.6	1.89474	1.33333	1.9	1.8	1.33333	2
1288	2	4	9	0	2.33	3.55	3.17	2.82	3.64	2.17	2.58	4.25	3.8	1.47368	1.66667	1.5	2	1.33333	1.33333
1289	2	4	9	0	3	3	3.33	3.64	3.18	2.83	3.08	3.38	2.6	2.21053	1.66667	1.6	1.6		1.83333
1290	2	4	9	0	3.58	3.55	4	2.45	2.73	3.25	2.5	4.13	4	2.57895	1	1.7	2	1.16667	1.16667
1291	2	4	8	0	3.25	3.82	3.42	3.91	2.18	3.33	2.5	2.75	1.8		2.75	2.2	2.2	1.16667	2.83333
1292	2	4	8	0	3.33	3.64	2.83	2	3.82	2.33	2.08	4.75	2.2	2.05263				1.5	2
1293	2	4	9	0	2.75	3.91	3.58	3.18	3.09	3.33	2.92	3.13	3.2	2.31579	1.41667		2.4		1.66667
1294	2	4	10	0	3.17	3.09	2.58	2	3.36	2.08	2.83	3.5	3.1	2	2.58333	1.3	1.8	1.83333	2
1295	2	4	9	0	2.92	3	3.83	3	3.36	3.08	3.08	4.13	3.7	1.57895	1	1.5		1.16667	1.33333
1296	2	4	9	0	3.5	3.27	2.83	2.91	3.82	2.75	3.33	3.88	3.6	2.63158	1.08333	1.7	1.8	1	1.5
1297	2	4	8	0	2.67	2.36	3.25	2.91	2.09	3	2.42	3.63	3	2.21053	1.5	2	1.8	1.66667	2.16667
1298	2	4	9	0	2.08	3.64	3.17	2.82	1.91	2.25	2.67	3	2.3	3.21053	1.41667	1.7	2.8	1.83333	1.83333
1299	2	4	8	0	3.42	3.09	3.92	3.45	4	2.67	2.58	4.38	3.5	3.10526	1.33333	1.5	2.8	1.16667	2.33333
1300	2	4	9	0	2.58	2.27	3.42	3.09	2.64	3.33	2.83	3	3.9	3.15789	1.41667	2.3		1.33333	2.33333
1301	2	4	9	0	1.58	2.45	2.75	1.91	3.73	1.75	1.58	3.13	2.7	3.05263	1.08333	1.7		1.16667	1.83333
1302	2	4	9	0	2.42	2.64	4.5	2	2.82	3.08	2.92	4.13	2.6	3.42105	1.33333		2.8	2	3.16667
1303	2	4	8	0	2.17	2.64	3.5	2.36	2.64	3.42	2.92	3.88	3.2	2.47368	1.08333	1.5	1.6	1.16667	1.83333
1304	2	4	9	0	1.42	2.45	2.42	2.64	1.55	2.17	1.92	4.5	3.5	3.36842	1.25	2.3	1.8	1.66667	2.16667
1305	1	4	8	0												1.5
1306	1	4	9	0	3.5	3.45	3.5	3.64	3.55	3	3.67	3.13	3.6			2.3	2	1.33333
1307	1	4	9	0	4	3.45	4.33	2.91	4.09	3	2.75	4.13	4.9	2.68421	1.58333	2.1	2	1.66667	2.5
1308	1	4	9	0	2.92	2.45	4.33	2.18	3.27	2	1.42	2.75	2.8		1			1.66667	1.5
1309	1	4	8	0	3	2.36	4.25	2.73	3.09	2.17	2.42	3.5	2.7	2.52632	1.75	2	1.8	1.83333	2.33333
1310	1	4	9	0	2.33	2.91	3.5	2.73	2.09	2.33	2.67	4.13	4	1.57895	1.08333	1.1		1	1.66667
1311	1	4	8	0	4.92	4.45	4	2.82	3.82	3	4.17	4.13	4	3.21053	1.5		1.6	1	2
1312	1	4	10	0	2.25	2.82	3.67	3.09	2	3.33	2.67	4	2.1	1.63158	2.41667	2	1.2	2	2.33333
1313	1	4	10	0	2.75	2.55	3.67	3.27	2.09	2.42	1.83	3.63	3.4		1.16667	1.3	1.6	1.33333	2.16667
1314	1	4	9	0	2.67	1.82	3	1.55	2.73	2.17	2.83	4.25	3.6	2.73684	1.16667	1.9		1	2.33333
1315	1	4	9	0	3.67	2.82	3.5	2.82	3.73	3.17	2.5	5.38	4.2	2.94737	1.41667	1.4		1.5	2.16667
1316	1	4	9	0	4.17	3.55	3.17	3.09	3.73	3.67	4.25	5.63	2.9	2.36842		2.6	2.6	2.16667	2
1317	1	4	10	0	2.5	2.27	2.75	1.64	3	2.17	1.33	3.75	2.7	2.42105	2.16667		2.4	2.5	2.66667
1318	1	4	9	0	2.67	2.55	3.42	2.91	3.09	2.5	2.5	4	4.6	2.15789	1.5	2.1	1.2	1.5	3
1319	1	4	8	0	4.17	3.36	2.17	3.27	3.64	3.58	3.58	3.25	3.3	2.68421	1	1.9	2.8	1.16667	1.5
1320	1	4	9	0	3.75	4.27	3.33	3.73	4.27	3.58	2.92	3.13	2.6	2.78947	2.41667	2.4	2.2		2.5
1321	1	4	9	0										2.84211	2.08333	2	1.2	1.66667	3
1322	1	4	9	0	2.25	2.18	3.08	2.91	1.91	2.17	1.75	3.75	2.7	2.57895	1.16667			2	2
1323	1	4	9	0	2.08	2.36	2.67	1.73	2.27	1.75	1.75	5.5	3.6	3.31579	1.58333	2.1	1.4	2	3.33333
1324	1	4	10	0	2.67	2.18	3.75	2.09	2.36	1.67	1.67	4.88	5	3.10526	1	1.5	2	1	1.66667
1325	1	4	10	0	1.67	2.55	3.33	1.91	2.45	2.08	1.83	4	4.2		2.16667	2		1.66667	2.33333
1326	1	4	9	0	4.83	2.82	3.25	3.27	3.55	3.5	3.67	3.13	3.4	2.21053	1.58333	1.9		1.5	2.33333
1327	1	4	10	0	2.67	2.64	4.42	4.55	3.91	3.67	3.25	3.75	2.5	2.05263	3.08333	2.1	1.8	2.83333	2.83333
1328	1	4	9	0	3.17	3.27	3.08	3	4.09	2	1.75	4.38	2.7	2.68421	1.41667	1.7	1.6	1.66667	2
1329	1	4	11	0										3.47368	1.33333	3.1	2.4	1.16667	2.66667
1330	1	4	9	0	2.5	3.27	3.42	2.64	3.73	2.67	2.92	4	4	2.57895	1.5	2.2		2.16667	2.5
1331	1	4	9	0	1.83	2.64	3.58	2.55	1.91	2.92	1.33	3.38	2.7		2	2	3	1.66667	2.83333
1332	1	4	9	0	3.58	3.09	3	2.18	4.82	2.25	2	3.75	4.3	3.15789	1.33333	2.8	1.8	2.33333	3
1333	1	4	9	0	2.83	2.55	2.83	2.18	4.45	3.75	2.33	4.63	5.2	2.52632	2.16667	1.6	2.4	2	2
1334	1	4	9	0	4.33	4.27	4	3.55	3.91	3.92	3.75	4.13	2.1	2.42105		1.8	1.8	1.66667	2.5
1335	2	4	8	0										3	1.83333	2.1		1.5	2.16667
1336	2	4	10	0	3.17	3.27	3.67	3.09	4.18	3.08	2.92	3.75	3.9	1.73684		1.4	1.4	1.5
1337	2	4	9	0	2.33	2.36	3.17	2.36	2.27	2.75	1.83	3.38	3.7	3.10526		1.9	2.6	1.66667	1.66667
1338	2	4	8	0	4.42	4.27	2.83	3.55	4.27	3.42	4.25	5.38	4.4	3.10526	1.33333		1.8	1	3
1339	2	4	9	0	2.42	2.73	4	2.91	2.09	2.58	2.67	3.88	3.2		1.5	1.7	2.2	1.5	3.16667
1340	2	4	9	0	2.75	3.09	4.17	3.36	4.36	2.08	2.17	3.25	4.4	3.26316	1.25	1.8	1.4	1.5	2.66667
1341	2	4	9	0	2.58	2.64	3.67	2.91	2.45	2.67	2.67	4.13	2.9	2.78947	3.16667	3.4	2	2.5	3.16667
1342	2	4	9	0										2.47368	1.33333	1.8	2	1.5	2
1343	2	4	10	0	2.75	2.91	3.5	3.64	3.27	3.17	3.33	4.25	3.6	2.26316		2.1		2.16667
1344	2	4	9	0	1.58	2.36	2.83	2.36	2.64	2.08	1.67	3.13	3.1		1	1.9	1	1	1.66667
1345	2	4	9	0	2.42	2.91	2.58	2.18	2.36	2.58	2.25	4.63	3.1	2.73684	1.08333	1.8	2.6	1.33333	2.33333
1346	2	4	9	0	2.58	2.91	3.33	2.91	3.18	3.08	2.33	3.75	3.1		1.08333
1347	2	4	10	0	4.5	4.27	3.42	3	4	2.67	4.92	3.38	1.7			2.3	1.8	1.66667	2.33333
1348	2	4	9	0										3.36842	1	2.8	1	1.16667	2.5
1349	2	4	9	0	1.42	2.91	3.25	3	1.91	2.67	2.5	3.13	3.5	2.94737	1	1.6		1.16667	2.16667
1350	2	4	8	0	2.75	3.09	3.92	3.09	3.45	3.5	3.08	4	4	2.68421		1.5	1.6	1	1.5
1351	2	4	9	0											1.75		2.2	1.33333	2.5
1352	2	4	9	0	2.92	3	3.5	4.09	1.91	3.42	3.33	2.75	1	1.36842	1.33333		1.2	1.16667	1.66667
1353	2	4	9	0	3.08	2.82	2.5	2.36	2.55	2.67	1.67	4.38	3.9	2.05263		1.6	2	1.83333	2
1354	2	4	8	0	1.92	2.64	3.25	3.36	2.09	2.58	2.33	3.88	2.7	2.10526	2.16667	2		1.83333	2.66667
1355	2	4	9	0	1.75	2.55	3.75	2	2.55	2.5	2	3.88	3.8	2.84211		1.6	1.4	1.5	2.5
1356	2	4	8	0	2.25	2.82	3.83	3.09	2	3.17	2.67	4.13	2.1	3.31579	1.58333	2.4		1.33333	2.16667
1357	2	4	9	0	2.33	3.27	4.33	3.36	1.91	2.67	2.5	3	3.4	2.57895	1.16667	2	1.4	1.5	3
1358	2	4	9	0	1.75	2.45	4.92	2.55	2.55	1.75	2.25	4.13	2.8	2.84211	1.08333	1.6	2	1	1.5
1359	2	4	9	0	3.25	2.64	3.83	2.55	3	2.83	2.83	4.63	4	2.47368	1.08333	1.7	2.6	1.33333	1.66667
1360	2	4	9	0	3.67	3.18	3.33	3.09	4.36	3.17	3.75	3.88	4.4	2.94737	1.08333	1.5	2	1.16667	2.16667
1361	1	4	9	0	3.58	3.82	3.42	3.55	3.18	3.25	3.33	3.5	3	2.42105	2.16667	2.2	2	2.16667	2.16667
1362	1	4	10	0	4.67	3.82	3.17	3.64	3.82	3.25	3.67	4.88	3.8	2.31579	2.08333			2.16667	1.83333
1363	1	4	9	0	2.17	2.55	4	3	1.73	3.17	2.25	2.63	3.4	2.68421	1.25	2.1	2	1.5	2
1364	1	4	8	0	1.75	2	2.42	1.73	1.82	2	1.67	3.63	3.9	2.73684	1.41667	1.5	2	1	1.5
1365	1	4	9	0	1.83	2.55	3.08	3	2.36	2.25	1.5	3.88	2.9	2.68421	2.58333	2.4	2	1.33333	3
1366	1	4	9	0	2.5	2.55	2.92	3.73	2.18	3.25	1.92	2.38	1.5	1.73684	1.25	1.8	2	1.33333	2.16667
1367	1	4	9	0	2.5	3.45	3.75	3	1.82	2.33	1.67	3.75	3.2	2.84211	1	1.5		1
1368	1	4	10	0	2.42	3.73	3.08	3	3.45	3.58	3.42	3	3.3	1.73684	1.91667	1.7	1.8	1.66667	1.5
1369	1	4	9	0	2.58	2.73	3.5	3	3.09	2.75	2.5	3.5	3.2	2.26316	2.25	2	1.8	2.16667	2
1370	1	4	10	0	3.17	3.45	3.5	2.73	3.27	2.58	2.92	2.63	3.3			1.9	2.4	1.66667	2.16667
1371	1	4	10	0	2.67	3.36	3.17	3.73	2.55	3.33	2.92	2.38	2.6	2.15789	1.75		1.6	1.83333	2.83333
1372	1	4	9	0	2.92	3.27	4.33	2.73	2.91	3.25	3.25	4.13	4.8	2.73684	1.25			1	1.5
1373	1	4	9	0	2.58	4.09	3.83	3.55	2.36	2.42	3.08	3.75	3.5		2	2.6	3	2.33333
1374	1	4	9	0	2.42	2.18	2.92	2.27	1.91	3.5	1.58	3.5	2.8	2.21053	1.5	1.4	2.2	1.5	2.16667
1375	1	4	9	0	2.58	2.82	3.42	2.18	2	2.83	2.33	3.13	4		1.25			1.33333	1.83333
1376	1	4	9	0	3.17	3.73	4.08	2.91	4	3.25	3.17	4.63	4.2	2.47368	1.5	1.8	1.4	1.66667	2
1377	1	4	10	0	3.17	2.64	3.5	2.27	2.82	2.08	2.83	4	3.7	2.63158	2.08333	2.2	2.2	2	2
1378	1	4	9	0	2.42	2.82	3.17	4	1.91	3.08	3.5	2.88	1	2.36842		1.6	1.2		1.83333
1379	1	4	9	0	3.58	3.73	1.92	2.55	3.64	3.58	3.58	4.75	3.6	2.57895	1.66667	2	1.8	1.66667	1.66667
1380	1	4	9	0	3.17	3.18	3.58	2.73	3.45	2.08	2.17	4.38	5.1	2.94737	2.41667		1.2	1.83333
1381	1	4	9	0	3.75	3.82	3.33	3.18	4.36	3.08	3.92	4.38	4.5	2.78947	1.08333	1.5		1.5	2.5
1382	1	4	9	0	3.25	3.18	3.92	3.64	3.09	3.83	3.33	4	2.7		1.58333	2.8	2.2	1	1.66667
1383	1	4	9	0	3	1.73	3.67	3	3.73	3	2.33	3.63	3.4	2.78947		2			1.83333
1384	1	4	8	0	2.83	3.18	3.83	2.64	2.73	2.83	2.67	3.63	3.8	2.26316	1.33333	2.2	1.8	2.5	2.16667
1385	1	4	9	0	2.58	3.91	4.5	2.55	2.64	2.58	3.58	4.63	2.8
1386	1	4	9	0	1.25	2.91	3.08	1.64	1.82	2.42	1.25	4.88	2.4	2.73684	1.08333	1.7	2.2	1	1.83333
1387	1	4	9	0	2.5	2.27	3.17	2.09	2	2	2	5	3.9	2.05263	1.25		3	1.33333
1388	1	4	10	0	3.25	3.36	2.75	2.91	3.18	3	3.25	3.38	3.9	2.21053	2.33333	2.1	3	1.33333	2.16667
1389	1	4	9	0	1.42	2.09	3	1.09	1.82	1.83	1.17	4.25	3.5	3.52632	1.5	1.6	2.6	1.83333	2.16667
1390	1	4	9	0	1.42	2.18	3.75	2.18	2.36	1.75	1.25	3.38	3.9	2.31579	1.25	1.3	1.6	1	1.33333
1391	1	4	9	0										2.57895	1.91667	2	2.6	2.16667	2.5
1392	1	4	9	0	2.67	2.18	4.58	2	1.18	3.33	2.92	4.13	2.7		1.41667	1.8	2.2	1.83333	2.5
1393	2	4	8	0	2.17	2	3.83	3.27	3.09	3.5	2.25	2.75	4.6	2.68421	1.16667	1.9	1.8	1.66667	3
1394	2	4	9	0	2.33	1.27	3.08	3.45	2.09	2	1.83	4.25	2.2			1.4	2	1.33333	2
1395	2	4	9	0	2.33	3.45	4.58	2.91	3	3	2.92	4.25	3.9	2.63158	1.33333	1.9	2.4	1.5	2.16667
1396	2	4	11	0	3.17	3.18	3.5	2.64	2.64	2.92	2.67	3.75	2.7	2.63158	1.58333		2.4	1.83333	2.66667
1397	2	4	9	0	3.5	3.45	3	2.91	4.36	3.33	3.33	5.13	3.6	2.94737	1.08333	1.8	2.8	1.66667	2.5
1398	2	4	9	0	2.33	3	3.83	2.18	2.73	2	1.5	3.5	3.3	2.94737	1.41667	2.1	2.6	1.33333	2.33333
1399	2	4	9	0	3.17	2	3.08	2.64	3.27	2.42	2	4.13	3.4	3.15789	1.58333	2.1		1.5	2.33333
1400	2	4	9	0										3.31579	1.25	1.9	3.4	1.5	2.5
1401	2	4	9	0	2.25	3.18	2.42	3.18	3.45	2.08	1.75	3.5	4	2.89474	1.16667	1.9	1.8	1.66667	2.66667
1402	2	4	9	0	2.25	2.45	2.75	2.91	2.45	2.42	1.33	2.63	3			1.8	1.4	1.16667	2.66667
1403	2	4	9	0	1.92	2.18	3.33	2.55	3.36	2.33	2.33	4.13	3.5	2.89474	1	1.6	2.8	1.33333	1.66667
1404	2	4	9	0	3.25	3.36	3.83	3.73	2.36	3.33	3.58	2.5	2.4		1.16667	1.5		1.33333	1.66667
1405	2	4	8	0
1406	2	4	9	0	3.17	3.64	4.42	3.45	4.55	3.33	3.58	4.38	3.5	2	1.91667	1.8		1.16667	1.66667
1407	2	4	9	0	2.67	2.82	3.33	2.55	2.73	2.25	1.83	4	3.7	3.47368	1	2.3		1	2.33333
1408	2	4	9	0	2.75	4.27	4.33	2.73	3.45	2.58	2.5	3.75	4.1	2.42105	1	1.6	1.8	1.33333	2.33333
1409	2	4	9	0	2.33	3	3.92	1.91	3	2.08	1.67	3.5	3.2	2.84211	1.25	1.6	1.8	1.5	3
1410	2	4	9	0	3.25	3.45	4	3.45	4.18	2.75	2.83	4.5	3.5			2.8	2.6		3.16667
1411	2	4	9	0	3.58	2.73	3	2.73	5.09	2.58	3.08	4.63	4.1	2.31579	1.25	2	1.8	1.33333	2.5
1412	2	4	9	0	3.33	3	3.58	3.36	3.18	2.83	2.83	3.75	3.1	2.05263	2.16667	1.8	2	2.33333
1413	2	4	9	0	2	2.64	3.33	4.36	2.18	2.67	2.33	3.13	2.8	2.78947	1.33333	1.5	2.2	2.16667	2.66667
1414	2	4	8	0	1.83	2.82	2.5	1.18	1.18	1.25	1	3.5	3.5	3.52632	1	1.8	3.2	1	3
1415	2	4	8	0	3.42	3.36	3.58	3.18	3.55	3.67	2.83	3.63	2.3	2.57895	1.91667	2.5	2.2	2	2.5
1416	1	5	10	0										2.42105	1.66667	2.3	3.2	1.83333	2.66667
1417	1	5	10	0	2.92	2.55	3.33	3	2.55	2.67	2.75	2.63	2.2	2.78947	1.58333		2	1.33333	2.16667
1418	1	5	11	0	3.5	3.73	3.25	3.09	3.91	3	3.83	3.88	3.2	2.31579	1.66667	1.3		1.33333	2.33333
1419	1	5	10	0	5.42	3.73	2.25	4.27	4.64	3.5	5.25	4.88	3	2.73684	1.41667	2.2		1.5	2.66667
1420	1	5	10	0	4.17	3.45	4.58	3.55	3.91	3.67	3.08	4.5	3.7	1.52632	2.08333	1.9	1	2	2.33333
1421	1	5	10	0										2.42105	2.08333	2	2	2.33333	2.33333
1422	1	5	10	0	1.67	3.27	3.33	2.18	2.73	2.17	2.5	4.88	3.9	2.73684	1.58333	2.2		1.5	2
1423	1	5	10	0	2.33	2.91	2.58	2.36	3.27	1.92	2.17	3.88	4	2.31579	2.33333	2.1	2	2.83333	2.33333
1424	1	5	9	0	3.42	3.45	3.58	3.27	2.36	3.25	3.75	4.63	3.7	3.21053	1.08333	2.2		1.16667	2.16667
1425	1	5	9	0	3.17	2.73	4.33	3.73	4.18	2.92	2.92	4	4.3	3.47368	1	1.8	1.6	1.5	1.83333
1426	1	5	10	0	3.17	2.91	2.58	2.73	3	3.25	2.5	4.5	5	2.68421	1.75	1.6	1.8	2.16667	2.16667
1427	1	5	11	0	3.42	2.45	3.08	3.64	3.36	3.17	3.33	3.5	3.1		1.33333	1.6	1		1.66667
1428	1	5	10	0	2.25	2.91	3.5	2.36	2.82	2.67	2.08	4.88	3.4	2.68421	1.08333	1.9	2.6	1.16667
1429	1	5	9	0	2	2.45	3.5	1.73	2.18	2	1.5	2.75	3.5	3.21053	1	1.7		1.16667	1.5
1430	1	5	10	0	2	2.45	3.17	1.64	1.82	2.25	1.25	2.88	3.6	2.57895		2.1	1	1.5	2.83333
1431	1	5	10	0	4.33	3.09	2.75	2.73	3.45	3.5	2.42	3.88	2.8	2.57895	1.16667	1.3	2.8	1	1.33333
1432	1	5	10	0	2.92	2.91	3.42	3	3.09	2.92	2.42	4	4.1	3.05263	1.08333	2.3	2	1.33333	2.33333
1433	1	5	10	0	3.08	4.45	3.08	3.73	2.91	2.67	3	3.5	3.3	2.15789	1	1.5	1	1	1.66667
1434	1	5	11	0	3.17	3.45	2.25	2.73	3.18	2.67	2.33	4.5	3.4	2.05263	1.83333	1.7	1	1.66667	2.33333
1435	1	5	10	0	2.33	4.09	3.33	2.91	2.91	4	3.58	3.25	4.6	3.31579	1.83333	2.6		2	2.33333
1436	1	5	10	0	2.83	3.45	3.42	3.64	3.82	3.67	3	3.75	3.9	2.52632	1.33333	1.8	3	1.33333	3.16667
1437	1	5	10	0	2.67	2	3.42	2.09	2.64	1.75	1.83	4.25	3.2	2.94737	1.66667	1.5	1	1.16667	1.83333
1438	1	5	10	0										2.31579	1.08333	1.5	2.4	1	2.33333
1439	1	5	10	0	1.92	2.09	3.17	2.36	2.45	2.33	1.83	3.13	5.2		1.16667	1.9	2.4	1	1.83333
1440	1	5	10	0	2.92	3.36	2.67	2.64	2.82	1.92	1.92	4.75	4	2.89474	1.66667	2	1	1.66667	1.66667
1441	1	5	11	0	3.67	3.09	3.58	3.27	2.55	2.67	3.33	4.63	3.7	2.73684	1.08333	2.2		1.16667	2
1442	1	5	10	0	3.67	3.27	3.58	3.18	3.27	3.83	2.33	3.88	2.9	2.73684	1.41667	2.4	1.4	1.66667	2.16667
1443	1	5	10	0										3.47368	1.41667	2.4	1.8	1.33333	2.33333
1444	1	5	11	0	3.33	3.18	3	2.45	3.27	2.92	2.67	4	3.6	2.89474	1.08333	1.7		1.16667	1.16667
1445	1	5	11	0	3.75	3.55	4	3.18	4.27	3	4.25	5	4.9	1.52632	2.83333	2.8	1	2.66667	3.16667
1446	1	5	10	0	3.58	3.91	3.92	3.55	2.82	3.08	2.83	4.38	4.1	3.47368	1.83333	3.2		2	2.5
1447	1	5	10	0	2.83	3.45	4.17	2.64	2.55	3.08	2.58	4	3.9	2.63158	1.5	2.5	2.8	1	3
1448	1	5	10	0	4.25	3.64	3.83	3.18	2.91	2.83	3.5	5.25	3.9	2.52632	1.91667	2.6	2.6	2.16667	2.83333
1449	1	5	11	0	4.25	3	4.75	2	2.27	3.08	2.25	4.13	3.7	2.42105	2.16667	2.3	1.8	1.66667	2.66667
1450	2	5	11	0	2.83	2.55	2.67	1.55	2.73	2.25	1.58	3.13	2.7	2.94737	1.08333	1.4	1.8	1
1451	2	5	11	0	3.5	3.18	3.5	3	3.09	3	2.75	4.38	4.4	3.10526	1.16667	1.5	2.8	1	1.66667
1452	2	5	10	0	1.42	1.91	2.5	1.45	2.27	1.25	1.42	4.5	3.7	2.73684	1.25	1.8	1.8	1.5	2.83333
1453	2	5	10	0	2.67	2.82	2.58	3.36	3.36	3	2.83	5.13	4	3.21053	1.25	2	1	1.33333	2
1454	2	5	9	0										2.94737	1.5	2.1		1.5	2.83333
1455	2	5	10	0	3.58	3.36	3.17	2.64	4	2.75	2.75	4.63	4	3.52632	1	2.2	2.2	1	2.66667
1456	2	5	11	0	2.33	2.82	2.67	2.36	3.27	2.17	2.17	3.88	4	2.68421	1.58333	2.3	1.2	1.66667	3
1457	2	5	10	0	2.25	3.55	3.92	2.82	2.82	2.08	2.25	4.38	3.4	3.26316	1.16667	2	1.2	1.5	2
1458	2	5	11	0	2.92	2.45	3.58	2.82	2.91	3	2.08	4.75	4.6	3.05263	1	1.9	2.4	1.16667	2.66667
1459	2	5	10	0	4.17	3.45	2.08	2.82	4.27	3.58	3.42	5	4.4	2.68421	1.25	1.2	1.4	2	2.66667
1460	2	5	10	0	2.92	3.36	2.67	2.36	3.36	3.17	3.25	4.63	3.9		1.25	1.3	1.4	1.5	2
1461	2	5	10	0	2.75	2.73	3.67	3.55	3.09	2.58	3	3	3.2	2.15789	1.66667	1.9	2.4	1.5	2.5
1462	2	5	10	0	3.67	4.18	4	3.36	4.45	3.42	3.92	3.88	4.4	3.57895	1	2.3	2.8	1.16667	1.83333
1463	2	5	10	0	2.67	3.36	3.58	2.82	2.91	3.75	3.67	4.38	4.3	2.21053	1.25	1.2	1.8	1	2.33333
1464	2	5	10	0	2.17	2.73	4	2.45	1.73	2.25	1.92	4.38	3.7	3.42105	1.25	2.5	1	1.5	2.66667
1465	2	5	10	0	2.5	2.55	3.67	2.09	2.36	2.92	1.67	4.88	4.1	3.47368	1.33333	2.3	2.4	1.16667	2
1466	2	5	10	0	1.83	3.27	3.75	2.09	2.64	2.08	2.25	4.88	4.3	2.94737	1.25	1.5	1.8	1.66667	2
1467	2	5	11	0	2.67	3.09	3.83	2.82	2.64	3.92	2.58	4	3.5	3.15789	1.33333	2.4	3.4	1.16667	2.16667
1468	2	5	10	0	2.33	3.45	3.17	3.09	2.45	3	2.92	3.38	3.3	1.42105	1.25	1.4	1	1.16667	1.33333
1469	2	5	10	0	2.08	2.64	3.5	3.73	1.73	3.25	1.92	4	3.7	2.89474	1.25	2.3	1.8	2	2.66667
1470	2	5	10	0	3.67	3.55	3.42	3.45	3.91	3.5	3.58	3.63	4.1	2.73684	1.16667	1.6	1.6	1.33333	2.16667
1471	2	5	10	0	4.25	3.73	4.17	4	3.64	3.5	4.08	4.5	2.5	3.57895	1	1.9	2.8	1	2.5
1472	1	5	10	0	4.08	4.64	2.5	2.55	3.73	3.17	2.42	5.63	2.7	2.36842	2.33333		1.4	2.16667	2.33333
1473	1	5	10	0	3.58	3.18	2.58	2.64	3.27	2.75	3	4.75	4.3	3.57895	1.16667	2.8	1.4	2.33333	3
1474	1	5	10	0	3.25	3.36	2.58	2.45	2.91	2.67	2.92	4	3.6	2.89474	2.25	1.9	3.2	1.5	3
1475	1	5	10	0	2.42	2.64	3	2.36	1.73	2.08	1.58	3.13	2.3	2.84211	1	2.2	1.2	1.33333	2.83333
1476	1	5	10	0	3.58	3	4.58	3.55	3.09	3.75	3.83	4	2.7		3.66667			3	3.83333
1477	1	5	10	0	3.25	3.55	2.83	2.82	3.09	3.5	2.92	4.75	3		3	3.1	3.6	2.83333	3.33333
1478	1	5	10	0	2.33	2.55	2.92	2.73	2.18	2	1.75	3.75	3.9	2.21053		2.1	2	2.33333	1.66667
1479	1	5	10	0	2.67	2.18	4.58	2	1.18	3.33	2.92	4.13	2.7	2.36842	1.16667	1.9	2.2	1.5	2.83333
1480	1	5	11	0	1.67	2.82	3.67	3	1.27	2.42	2.25	3	1.7	1.57895	1.16667	1.3	1.8	1.16667	1.16667
1481	1	5	10	0	3.42	3.36	3.17	3.09	2.27	3.17	3.58	3.5	2.1		1.66667	1.7		1.66667	2.33333
1482	1	5	9	0	3.67	3.36	4.42	3.27	3.27	3.33	2.92	3.88	3.3	2.52632	1.25		1.6	1
1483	1	5	10	0	1.5	2.18	3.42	1.82	3	2.67	1.75	5	4.7	3.05263	1.83333	1.7	1.8	1.5	2.16667
1484	1	5	9	0	2.5	3	4.08	4.27	1.91	3.17	2.42	2.63	1	2.15789	1.83333	1.6	1.2	2	2.16667
1485	1	5	10	0	2.58	2.82	3.75	3	2.73	3.17	2	3.5	3.4	2.78947	1.41667	1.4	2.4	1.33333	2.33333
1486	1	5	10	0	3	3.64	4.25	3.73	3.18	4.17	3.08	3.13	3.4	2.94737	2.25	3		2.5	2.16667
1487	1	5	10	0	4.5	3.91	2.92	2.73	4.36	2.08	3.08	4.5	3.4	2.57895	2	2.3	2	2	2
1488	1	5	10	0	2.42	2	2.5	1.55	2.27	1.58	2.08	4.5	3	2	1.75	1.8	2	1.5	2.16667
1489	1	5	11	0
1490	1	5	9	0	2.17	2.18	2.92	1.73	2.82	1.92	1.5	4.38	4.5	2.78947	1	1.5	3.2	1	1.66667
1491	1	5	11	0	3.08	2.64	3.92	3.55	3.27	3.58	2.42	4.25	2.7		1.91667		2	2	2
1492	1	5	11	0	3.08	2.82	3.75	3.64	3.36	3.42	2.75	4.25	2.6	3.31579	1.25	2.5	2.4	1.83333	2
1493	1	5	10	0	3.42	3.18	2.75	2.55	3.27	2.92	3.17	4.38	4.6		1.58333	1.8	1	1.33333	2.66667
1494	1	5	10	0	3	3.45	4.25	3.64	3.18	4.17	2.83	3.5	3.5		1.33333	1.6		1.83333
1495	1	5	10	0	3.42	2.91	2.92	3.91	2.64	3.83	3.67	4	2.8	2.21053	1.33333	2	1.2	1	1.66667
1496	1	5	10	0											2	2	2	1.83333	2.66667
1497	1	5	10	0	3.58	3.45	3.33	3.18	2.91	3.08	3.33	3.63	3.9	2.94737	2.58333	2.8	3	3	3.16667
1498	1	5	10	0	3.58	3.55	3.58	3.91	3.36	3.5	3.42	3.75	2.9
1499	1	5	10	0	3	3.27	3.42	3.09	3.27	2.42	2.42	3.88	3.6	1.52632	2.16667	1.8	1.8	1.66667	1.16667
1500	1	5	10	0	3.17	3.18	4.5	3.09	3.45	4.17	2.75	3.75	3.1	3.21053	1.41667	1.8	1.6	1.16667	1.33333
1501	2	5	10	0										3.15789	1.5	2.5	2.2	1.16667	3.16667
1502	2	5	10	0	2.67	2.91	2.92	2.45	1.73	3.25	2.25	1.63	2.5	2.63158		1.3	1.6	1	1.83333
1503	2	5	10	0	3.75	2.36	3.33	4.18	3.64	3.17	3.58	3.25	3.7	2.57895	1.75	1.4	1	2	2
1504	2	5	9	0	2.58	3	3.25	2.09	3.27	3.17	2.83	3.88	3.9	1.94737	1.75	1.8	1.2	1.5	2.33333
1505	2	5	10	0	4	3.55	3.83	2.91	4.27	3.25	4.25	3.75	4.6	2.15789	1.66667	2	2.2	1.83333	2
1506	2	5	10	0	1.75	2.55	2.58	2.36	2	3.08	1.75	4.38	2.3	2.73684	1.33333	1.9	1.6	2.5	3.5
1507	2	5	10	0	2.5	3.27	3.08	2.27	2	2.75	1.83	4	3.8	2.31579	1.83333	1.7	2.8	1.16667	1.66667
1508	2	5	10	0	1.58	2.09	2.42	1.45	2.09	2	1.08	3.88	3.8	3.10526	1.25	1.9	2	1.66667	2.16667
1509	2	5	10	0	2.17	1.91	3.42	1.91	1.82	2.67	2	3.75	3.3		1.58333		1	1.33333	1.33333
1510	2	5	10	0	3.75	3.45	3.5	2.82	4	3.5	3.42	3.25	3.8	2.63158	1.41667	1.8			1.83333
1511	2	5	10	0	2.25	2.09	3.83	1.73	2.45	2.75	2.17	3.38	2.8		1.33333	1.9	2.6	1.16667	2.33333
1512	2	5	11	0	1.75	2.45	3.33	2.91	3.64	2.42	1.42	3.38	3.6	2.63158	1.33333	1.8	1.4	1.16667	2
1513	2	5	10	0	3.58	3.45	3	3.73	3.45	2.83	2.92	3.25	3.6		2.66667	2.2	2.6	2	3.33333
1514	2	5	11	0	3.5	3.18	2.83	2.18	3.64	2.67	3	4	4.4	1.78947	1.33333	1.2	2.6	1	1.5
1515	2	5	10	0	3.5	3.18	3.5	3.09	3.82	2.75	3.17	3.75	3.9	3	1.33333	2.4	1.6	1.5	1.83333
1516	2	5	10	0	2.5	2.73	2.67	2.64	3.45	2.5	2.67	5.38	2.7		1.08333	2.2	1.6
1517	2	5	10	0	2.08	3.27	2.92	3.55	3.36	3.08	3.5	3.5	3.6	2		1.7	1.6	2.33333	2.66667
1518	2	5	10	0	3.58	3.45	3.67	3.64	3.36	3.58	3.75	4	3.7	2.21053	1.33333	2.3	2.4	1.16667	2.16667
1519	2	5	10	0	2.17	2.82	4.17	1.27	3.91	1.67	2	3.38	3.2	2.89474		2	2.4	1	2.33333
1520	2	5	10	0	2.58	2.55	3.17	2.18	4.45	3.42	2.33	4.63	5.2	2.78947	1.16667	1.5	1.6	1.83333	3.33333
1521	2	5	10	0	1.42	2.45	3.58	1.45	1.45	2.75	1.5	3.63	2.4	3.15789	1.25	1.8	2.2	1	2.5
1522	2	5	10	0	2.75	3.73	3.58	3.91	3.18	4.08	3.58	2.25	3.7
1523	2	5	10	0	3.42	3.45	4.17	3.45	3	2.42	4	3.88	3.7	2.21053	1	1.3	1	1	1
1524	2	5	10	0	2.67	3.82	2.83	3.36	3.73	3	3.25	3.75	5	3.57895	2	2.1	3.4	2	2.83333
1525	2	5	10	0	2.58	2.82	3.25	3.55	2.73	3.25	2.75	3.75	2.8	2.21053	1.58333	1.4	1.4	1.5	1.83333
1526	2	5	10	0	2.42	3	3.75	3.55	1.73	2.92	1.83	4.13	2.2	2.31579	2.08333	2.1	1.2	1.5	2.66667
1527	1	5	10	0	3.25	3.18	3.75	2.91	3.73	3.75	3.25	5.13	3.8		1.66667	1.9	2.4	2	3
1528	1	5	10	0	3.92	3.18	3.83	3.64	4.36	3.42	3.08	4.75	4.8	3.31579	1	2.2	2.2	1.5	2.33333
1529	1	5	10	0	2.83	2.64	2.83	2.36	2.45	2.17	1.92	3.75	3.4	3.52632	1.08333	2	2.4	1.5	2.16667
1530	1	5	10	0	3.5	3.55	3.42	3.64	3.82	3.17	3.58	3.13	3.1	2.31579	2.41667	1.4	2.4	1.83333	2.5
1531	1	5	10	0										2.47368	2.33333	2	2	2.16667	2.66667
1532	1	5	10	0	3.42	2.27	3.17	2.64	3	2.17	2.92	4.38	4.8	3.52632	1.16667	2.4		1.16667	2.16667
1533	1	5	11	0	2.58	2.55	2.42	2.73	1.64	3.33	2.5	3.5	2.8	2.78947	1.25	2.1	1.8	1	2.16667
1534	1	5	9	0	3.75	3.09	3	3.18	3.45	2.67	2.67	3.75	3.7	1.89474	3.66667	2.3	1.4	2	2.5
1535	1	5	10	0	4	3.64	2.42	3	4.64	3.08	4.08	4.25	4	2.63158	2.16667	1.8		1.83333	2.5
1536	1	5	10	0	2.25	2.64	3.5	2.64	1.73	3	2.33	3.5	2.2	1.68421	1.25	1.4		1.16667	1.66667
1537	1	5	10	0	2.67	2.64	3.83	2.73	2.91	2.92	2.83	4	3.7	3.05263		2.2	3.6	2.5	3.16667
1538	1	5	12	0	2.75	2.64	3.33	3	2.64	3.08	2.58	3.63	2.4	3.15789	1.16667	2	2.8	1	2
1539	1	5	10	0	2.67	2.82	3.5	2.82	3.55	3	2.25	4.13	4.5	2.78947	1	1.5	2.2	1.33333	2.83333
1540	1	5	12	0	3.17	3.09	3.33	3.73	3	3.67	3.42	3.13	2.9	2	2	2.2	2.2	2	2.5
1541	1	5	10	0	3.25	3.73	3.67	3	2.45	3.17	3.25	3.75	2.5	2.94737	1.41667	2.7		1.5	2.16667
1542	1	5	10	0	3	2.73	3.33	3	1.82	2.33	2.25	4.25	2.9	2.15789	1.58333	1.8	2.2	1.83333	2.33333
1543	1	5	10	0	2	2.36	3.5	2.36	2	3	1.92	3	2.9	2.89474	1.33333	2	2.8	1.5	2.16667
1544	1	5	10	0	1.75	2.45	2.83	1.82	2.27	2.25	2	4.57	2.7	2.36842	1.66667	2.5	2.2	2	3.5
1545	1	5	10	0	4.17	3.55	3	3.73	3.82	3.42	4.17	3.38	3	2.42105	2.5	2.8	3.2	1.66667	3.33333
1546	1	5	10	0	3	2.64	3.08	3.18	2.91	2.58	2.17	4.5	4.1	1.94737	1.66667	1.6	1.8	1.5	2.33333
1547	1	5	10	0	3.33	3.27	2.92	3	3.55	2.83	3.75	4.63	2.9	2.47368	1.5		2.2	1.66667	2.66667
1548	1	5	10	0	1.58	2.36	3.67	2	1.64	2.83	2.25	3.63	3.7	2.63158	1.41667	1.6		1.33333	1.33333
1549	1	5	10	0	2.75	3.36	2.75	3.36	2.27	3.83	3.08	3.88	3.5	2.21053	1.33333	1.7	2.4	1.33333	1.83333
1550	1	5	10	0	3.92	3.09	3.5	3	4.64	3.08	2.67	4.5	4.9	2.94737	1	1.7		1
1551	1	5	10	0	4.25	4.45	3.67	3.55	4.73	4	3.75	3	3.2	2.63158	3.33333	2.7		2.66667	3.16667
1552	1	5	10	0	3.58	3.27	2.42	2.45	3.45	2.58	2.83	4	3.7	2.31579	2.25	2	2.2	2.66667	2.33333
1553	1	5	10	0	3.92	3.36	3.25	3.45	3.82	3.67	3.42	4.13	3.1	2.63158	1.33333	2.4		1.16667	2.33333
1554	1	5	10	0	1.83	1.91	2.83	1.91	2.45	1.92	1.17	4.88	4.1	2.63158	1.25	2.4	2.6	1.5	2.83333
1555	1	5	10	0	2.08	1.91	3.17	2.45	3.55	1.83	2.42	4.13	3.7	3.47368	2.25	2.8	2.8	2	3.5
1556	2	5	10	0	3.33	3.55	4	3.36	3.55	3.25	3.33	3.75	3.8	1.73684	1.5	1.7	2	1	1.83333
1557	2	5	10	0	2.92	3.27	2.75	2.73	3	3.33	3.42	3.38	3.5	2.26316	2.91667	3.2	2	2.16667	3.33333
1558	2	5	9	0	3.58	3	3.67	3.45	3.45	3.67	3.5	3.75	2.1	2.05263	2	1.7	2.4	1.83333	2.16667
1559	2	5	10	0	2.83	2.91	3.58	2.64	2.73	3.25	2.92	2.75	3	3.21053	1.25	2.7	3	1	2.83333
1560	2	5	10	0	2.58	3.27	3.83	3.09	2.55	3.17	3.42	3	3	3.47368	1.25	1.6	2.6	1.5	2.5
1561	2	5	10	0	4.42	3.36	3.17	3.82	3.55	2.92	4.17	4.38	3.8	3.42105	1.16667	1.8	1.4	1	1.5
1562	2	5	10	0	2.33	2.09	2.83	3.09	2.45	2.92	2.83	4.38	3.7	2.21053	2.25	1.8		2	3
1563	2	5	10	0	2.33	3.27	3.42	2.82	3.27	3	2.67	3.5	3.9	2.47368	1.25	1.7		1.16667	1.66667
1564	2	5	10	0	2.92	2.91	2.75	2.27	3.36	2.92	2.42	3.88	3.9		2.66667	2.5	2.6	1.83333	3
1565	2	5	11	0	2.75	3.27	3.75	3	3.73	2.83	2.17	5	3.9	2.36842	2.5	2.1	2	2.16667	2
1566	2	5	10	0	1.92	1.82	4	2.27	2	2.42	1.58	4.25	2.7	3.47368	1.16667	2.6	2.4	1.5	2.66667
1567	2	5	11	0	2.25	3	3.75	3.55	1.73	2.92	1.83	4.13	2.2	2.21053	1.41667	2.2	2.6	1.16667	1.83333
1568	2	5	11	0	3.67	4	3.58	3.27	3.64	4.08	2.75	3.13	4	2.31579	1.41667	1.5	2.4	1.83333	2.83333
1569	2	5	10	0	2.92	3.55	4.25	2.45	1.73	2.5	3.17	3	2.6	2.94737	2.08333	2.7		2.83333	3.5
1570	2	5	10	0	1.92	3.18	3.08	3.18	2.45	3	3.08	3.13	2.8	2.26316	1.25	1.7	1.2	1.33333	2.66667
1571	2	5	10	0	3.42	3.45	3	2.36	3.18	3.08	2.42	4.5	3.3	2.36842	2.5	2.2	1.4	1.66667	1.66667
1572	2	5	10	0	3.75	4.55	2.83	3.36	3.73	3.5	4.25	4	2.6	2.84211	1.16667	2.2	1	1.16667	2.16667
1573	2	5	11	0	2.58	2.45	3.58	2	1.55	3.92	2.58	4.5	3.5	1.52632	2.08333	1.8	1.6	1.66667	1.66667
1574	2	5	10	0	1.67	3.09	3.67	2.18	2.82	2.5	1.92	3.88	5.4	2.78947	1.08333	2.6	2.6	1.33333	2.83333
1575	2	5	10	0	3.33	3.36	3.25	4	3.09	3.08	2.17	3.75	3.5	2.21053	1.33333	1.7		1.33333	2.16667
1576	2	5	10	0	3.92	3.36	3.92	3.45	3.55	3.42	4	3.25	3.7	2.10526	1.08333	1.8	1.4	1	2.33333
1577	2	5	9	0	2.75	4.18	3.75	2.82	2.55	2.33	1.67	4.38	2.8	2	1.5	1.4		1.33333	2.33333
1578	2	5	10	0	3.33	3.36	3.83	3.36	3.55	3.33	3.42	3.75	3.8	2.73684	2.5	2.3	3.2	2.5	3.16667
1579	1	5	10	0	2.83	2.82	2.67	2.64	2.82	2.17	2.42	3.5	3.2		1	1.6		1
1580	1	5	10	0	4	3.27	3.25	2.73	3	3.67	3.5	3	2.1	3.31579	1.41667			1.66667	2.33333
1581	1	5	10	0	2	2.91	3.67	2.73	3	1.67	1.92	4.25	3.9		1.66667	1.7	2	1.83333	2.5
1582	1	5	10	0	3.08	3.82	3.17	2.73	3.45	3.58	3.17	3.75	4.4	2.15789	3.08333	2.1	2.8	1.66667	3
1583	1	5	11	0	4.17	4	4.08	3.55	3.91	4.25	3.92	4.25	3.7	2.36842	1.91667	1.7	2.2	2.66667	2.5
1584	1	5	10	0										2.94737	2.66667	2.6	3.6	3	3
1585	1	5	11	0	3.33	3.18	3.25	3.36	3.27	3.33	3	3.38	2.7	2.73684	2.5	2.7		2.83333	3
1586	1	5	10	0	2.42	2.73	3.58	2.64	2.09	3	2.75	4.38	2.8	3.31579	1.16667	2	1.2	1.16667	1.83333
1587	1	5	10	0	1.33	2.64	2.17	1.73	1.64	2	1.42	3.88	3	3.10526	1.16667	1.8		1.16667	1.5
1588	1	5	11	0	1.92	2.45	3.25	2.36	2.36	2.58	2	3.38	2.4	1.94737	1	1.4	1.8	1	1.33333
1589	1	5	11	0	2.67	2.55	3.42	2.91	3.09	2.5	2.5	4	4.6	2.36842	2.25	2.1	2	1.83333	2.66667
1590	1	5	10	0	3.17	2.27	3.67	2.91	3.73	2.92	2.83	3.5	3.2	1.15789	1	1	1	1	1.33333
1591	1	5	10	0	3.5	2.82	3.67	3.09	4.27	3.08	2	3.63	4.5
1592	1	5	11	0	3.17	3.45	2.25	2.73	3.18	2.67	2.33	4.5	3.4	3.05263	2	1.9	1.4	2.33333	2.83333
1593	1	5	11	0	3.17	4.27	2.58	3.91	3.91	3.5	3.83	3.88	3.6	3.10526	3.08333	3	2.6	2.83333	3
1594	1	5	11	0	3.33	3.09	3.75	3.45	3.27	3.58	3.08	3	3.1	2.89474	1.16667	2.6	2.6	1.83333	2.66667
1595	1	5	10	0	3.25	3.36	3.5	3.91	2.55	3.5	3.5	2.75	2
1596	1	5	11	0	3	2.36	2.92	2.91	2.73	2.25	2.67	4.13	3.2	2.68421	1.16667			1.33333	1.5
1597	1	5	10	0										3.57895	3	3			3
1598	1	5	10	0	3.58	3.45	3.67	4	4.64	3.25	2.25	4.75	4.5	2.68421	1.58333	2.2	1.8	1.66667	2.5
1599	1	5	11	0	3.17	2.27	3.75	2.91	3.73	2.92	2.83	3.5	3.2	2.52632	1.25	1.6	1.8	1.66667	2.16667
1600	1	5	10	0	3.5	2.82	3.5	2.91	4.73	2.83	1.67	4.13	3.2	2.42105	1.08333	1.8	2.8	1.33333	2.16667
1601	1	5	10	0	2.83	2.55	4.25	1.91	3.91	1.75	2.58	3.88	4.1	2.26316	1.58333	2.2	1.6	2.83333	3.5
1602	1	5	10	0										2.36842	1.08333	1.7	2.2	1.66667	1.66667
1603	1	5	11	0
1604	1	5	10	0										2.52632	2.25	2.2	1.8	2.16667	2.83333
1605	1	5	10	0	2.58	2.36	2.92	2.09	2.64	1.33	2.58	4.5	3.4	2.94737	1.25	1.9	2.2	1.66667	1.66667
1606	2	5	10	0	2.5	3.27	3.58	3.82	3.36	3.08	2.5	3.88	3.9	2.31579		1.7		1.66667	2.16667
1607	2	5	10	0	1.33	2.45	3.25	2.82	2.55	2.25	1.75	1.63	2.9	3.21053	1.25	1.2	1.4	1.5	2.66667
1608	2	5	10	0	2.75	2.73	3.83	3.09	2.18	2.42	3	3.25	3.3	2.57895	1.16667	1.7	2.2	1.16667	2.33333
1609	2	5	10	0	2.25	3	3.33	3	2.18	2.25	2.92	2.38	2.4	2.42105	1.33333	1.9	2.2	1.16667	2.33333
1610	2	5	11	0	1.75	1.73	2.67	1.36	1.82	1.17	1.17	4.25	3.6	2.47368	2.5	2.1	1.2	2.16667	1.83333
1611	2	5	9	0	3.33	3.09	3.5	3.18	3.55	3.58	3.17	3.75	3.8		1	1.8	1.4	1.33333	1.83333
1612	2	5	11	0	2.58	3	3.08	3.09	2.64	3.08	2.58	3.13	3.7	1.78947		2.1	1.2	1.33333	2.5
1613	2	5	10	0	2.67	3.09	3.17	4.09	2	3.08	3.42	2.5	1.8	2.57895	1.33333	1.3	1.2	1	1.33333
1614	2	5	10	0	1.58	2.91	2.92	2.82	2.09	2.92	2	3	2.8	3.10526	1.33333	2.2	2.2	2	2.66667
1615	2	5	9	0	3.08	2.82	3.67	2.82	3.55	3.08	3.25	5.25	4.3	2.47368	1.25	1.9	1.2	1.66667	2.5
1616	2	5	10	0	2.5	2.91	3.58	3.36	3.27	3.42	3.58	5.25	3.7	3	1	1.7	1.6	1	1.5
1617	2	5	10	0	2.42	3.55	2.42	2.64	2.64	2.83	3.17	3.5	3.5	2.36842	1.83333	2.1	2.2	1.33333	2.5
1618	2	5	11	0	3	3.18	3.58	4.18	1.91	3.42	3.17	2.38	1.4	2.52632	2.41667	2.2	1.4	2.83333	1.83333
1619	2	5	10	0	2.42	2.09	3	3.36	2	2.42	1.25	3	2.8	3.10526	1.08333	2.2	1.2	1.16667	1.83333
1620	2	5	10	0	2.33	2.18	4	2.73	1.73	2.33	1.92	4.25	3.4	2.89474	1.83333	2.9	1	2	2.66667
1621	2	5	10	0	2.92	2.36	2.08	1.82	3	2.25	2.75	4.25	3.7	2.57895	1.25	1.2	1.4	1.16667	2
1622	2	5	11	0	3.25	3.36	3.42	3.55	3.09	3.42	3.58	3.13	2.9	2.15789	1.5	2.1	2.4	2.33333	3
1623	2	5	9	0	3.08	2.82	4.5	2.27	3.18	3.67	3.42	4.25	4.1	2.42105	1.25	2.3		1.66667	1.83333
1624	2	5	10	0	2.25	2.55	2.42	2.09	2.64	1.58	2.5	4.13	2.5	2.78947	1.16667	2.4	2	1.5	1.66667
1625	2	5	11	0	2.42	2.73	4.75	3.09	2.82	3.5	2.92	3.88	4.3	2.78947	1.33333	1.9	1.4	1.33333	2.33333
1626	2	5	10	0	3.08	2.73	3.33	3.18	3.55	2.33	2.42	3.75	3.9	3.52632	1.5	1.8	1.8	1.5	2
1627	2	5	10	0	1.5	1.27	3.67	2.45	2.18	2.25	2.08	2.38	2.1	2.73684	1.08333	1.7	1.2	1	1
1628	2	5	9	0	2.83	2.73	3.67	2.27	2.82	3.17	2.92	5.25	4.1	1.84211	2.75	1.8	1.2	1.5	1.83333
1629	2	5	10	0	2.08	2.18	2.92	2.82	2.82	1.67	1.42	4	3.9	1.47368	1.91667	1.9		2.16667	2
1630	2	5	10	0	2.67	3	2.75	2.45	3.18	2.42	2.92	4.5	3.5	2.42105	1.33333	1.8	1.8	1.33333	2
1631	2	5	10	0	1.83	2	3.33	2.45	1.73	2.17	1.92	3.63	3.2	2.78947	1.08333	1.9	1.6	1.16667	1.83333
1632	2	5	9	0	1.67	1.73	2.58	1.36	1.82	1.25	1.17	4.25	4	2.73684	1.08333	1.4	1.2	1	2
1633	2	5	11	0	3.92	3.64	3.08	3.64	4.82	3.83	3.75	4.75	4	2.10526	1.33333	1.3	1.6	2.5	1.5
1634	1	4	9	0	4.33	3.91	3.17	3.09	3.73	3.5	3.67	4.13	4.2	2.47368	1.25	1.8	2	1.16667	2.33333
1635	1	4	9	0	3.33	3.18	2.92	2.91	4.09	3.67	2.92	5.13	4.1		1.66667	1.8		2.33333	2.5
1636	1	4	9	0	2.83	2.64	3.33	2.27	2.45	2.25	2.17	2.75	2	2.05263	1.33333	1.6	2.2	1.66667
1637	1	4	9	0	1.75	2.73	3.42	1.09	2.45	2.5	1.92	3.5	3.3	2.26316	1.16667	2.2	1.6	1.33333	2.33333
1638	1	4	9	0	2.17	2.82	3.67	2.18	2.91	3.25	1.83	4	4	3.10526	1.16667	1.9		1.33333	2.5
1639	1	4	9	0	1.92	1.64	4	1.27	3	2.08	1.67	3.25	2.5	3.05263	1.41667	1.8		1.33333	2.16667
1640	1	4	9	0	3	2.64	3.08	2.73	3.45	2.17	2.75	4.25	3.4	2.63158	1.08333	1.8		1.16667	2.66667
1641	1	4	9	0	3	2.91	3.42	3.91	2.55	2.75	2.5	3.75	3.6	2.89474	1.75	2		1.33333	2.33333
1642	1	4	9	0	4.33	3.55	3.33	3.09	3.91	3.25	3.5	4.63	3.9	2.73684	2.75	2.8	2	2.16667	2.66667
1643	1	4	9	0	4.67	4.27	3.83	3.45	3.55	3.42	4.5	4.5	3.1	2.26316	2.33333	2.7	2.8	2.5	2.33333
1644	1	4	9	0	3.67	3.18	3.25	2.27	2.91	2.75	2.75	4.88	5.2	3.78947	1.33333	2.6		1.83333	2.16667
1645	1	4	9	0	3.75	4	2.92	3.09	4	2.75	3.25	4.88	4.5	3.47368		2.7	1.6	1.16667
1646	1	4	9	0	3.75	3.36	3	3.91	4.45	3.25	3.42	4.38	3.6	1.78947	1.83333	1.7	1.6	1.33333	2.33333
1647	1	4	9	0	2.92	3.36	4.58	2.64	3.91	2	2	5.25	4.8	2.68421	1.66667	1.9	2.4	2	2.16667
1648	1	4	9	0	4.25	3.45	3.67	3.55	3.36	3.08	4	4.38	2.8			1.8		1.16667	2.83333
1649	1	4	9	0	3.83	3.91	4.5	3	2.55	2.92	3.17	4.5	3.7	3	1.58333	2.6		1.5	2.5
1650	1	4	9	0	3.08	2.91	3.25	2.18	1.64	3.08	3.42	4.13	3.5	3.36842	1.83333	3.1	2	2	2.33333
1651	1	4	10	0	2.83	2.73	2.75	2.27	2.82	2.25	2.08	4.13	2.4	3.42105	1.08333	2.7	1.6	1	2.5
1652	1	4	9	0	2.83	3.18	3.58	2.82	3.55	2.92	3.92	4.25	3.8	2.21053	1.33333	2.3	2	1.66667	1.66667
1653	1	4	9	0	3.08	2.27	1.92	2	3.55	1.83	1.17	4	3.8	1.78947	3.25	3.1		2.66667	3.16667
1654	1	4	9	0	3.25	3.27	3.83	4.09	3	4.08	3.17	2.5	3.5	1.89474	2.33333	2.2	2.2	1	2.5
1655	1	4	9	0	3.92	3.45	3.17	2.91	3.82	3.08	3.5	3.88	3.9	2.47368	1.16667	2.1		1	1.33333
1656	1	4	9	0	4	3	2.17	2.36	3.36	2.17	2.58	4.88	3.3	3.57895	1	1.3		1	1.83333
1657	1	4	9	0	4.08	3.45	4	2.91	4.27	3.33	3.58	4	4.1	1.47368	1.41667	1.3	1.6	1.66667	2
1658	1	4	10	0											1.75	2.1		2.16667	2.33333
1659	1	4	8	0	2.08	3	3.5	2.91	2.36	2.08	2.92	4.13	4.5	1.94737	1	1.4		1	1.16667
1660	1	4	9	0	3.08	3.82	3.58	2.64	3.18	3.33	3.17	5	3	3.15789	2	3.2	2.2	1.83333	2.16667
1661	1	4	9	0	3.25	3	4.33	2.18	3.36	1.83	2.25	4.88	3.7	3	1.25	2.9	3.2	1.16667	2.33333
1662	1	4	9	0	3.08	2.82	3.67	3.09	2.82	2.67	2.83	4.13	3.6	3.68421	1.25	2.3		1.66667	2.66667
1663	1	4	9	0	3	3	3.83	3.18	3.45	3.58	2.58	4.5	3.7	2.68421	1.5	2.2		1.33333	2.83333
1664	1	4	9	0	3.17	2.91	4.08	3.45	2.27	3.08	3.92	3.25	4.1	3	1.16667	1.9	3.4	1.16667	3.5
1665	1	4	9	0	3.83	2.64	2.75	2.82	3.09	2	1.92	4.88	2.5	3.21053	1.41667	2.1		1.66667	2.16667
1666	2	4	9	0	3.33	3	3.5	2.64	4	3.17	2.83	4.63	3.8	3.10526	1.66667	2.2		1.5	2.16667
1667	2	4	9	0	1.58	1.64	4	1.55	2.27	1.83	1.25	4.63	3.6	2.84211	1.66667	2.4		1.16667	2.83333
1668	2	4	8	0	1.75	2.64	2.67	3.45	1.73	1.75	1.75	4.38	2.8	3.31579	2.16667	2.1	2.8	2.5	3
1669	2	4	9	0	2.58	3.18	3.25	2.09	3.36	2.33	2	3.88	3.2	2.42105	2.16667	2		1.83333	2.16667
1670	2	4	8	0	2.25	2.36	3.25	2.09	2.64	2.25	2.67	3.75	4.9	3	1	1.9		1.16667	2.33333
1671	2	4	9	0	4.25	3.18	4.33	3.55	3.55	3	3.58	4.13	3.7	3.21053	1.58333	2.3		1.16667	3
1672	2	4	9	0										3	1.5	1.7		1.83333	2.66667
1673	2	4	9	0	2.92	2.73	3.75	3.18	3.36	3.08	2.67	3.75	2.9	2.36842	1.33333	2.5	3	1.5	2.5
1674	2	4	9	0	3.92	2.45	3.67	2.82	2.09	2.17	2	2.5	2.6	3.15789	1.16667	1.8		1.66667	2
1675	2	4	9	0	2.17	2.82	2.92	3.64	3.18	3.5	2.67	4.5	3.7	2.21053	1.91667	2	2.4	2	2.5
1676	2	4	9	0	3.17	2.82	3.42	3	3.18	3.92	3.42	4.13	3.5	2.57895	1.75	1.8	2.4	1.5	1.66667
1677	2	4	9	0	3.42	3.45	3.58	3.09	4.45	3.25	3.17	5.38	4.3	2.15789	2.08333	2	2.4	1.5	2.33333
1678	2	4	9	0	4	3.55	2.92	3.09	4.18	3.17	3.17	4.38	3.4	2.68421	1.16667	2		1.16667	2.33333
1679	2	4	8	0	3.58	4.18	3.42	2.64	3.09	1.92	1.67	5	4.3	3	1.25	1.7	3.6	2	2.5
1680	2	4	9	0	3.08	3.36	3.5	2.73	3.64	3	3.17	4.5	3.7	2.68421	1	2	1.8	1	2.33333
1681	2	4	9	0	3.17	3.27	2.42	2.55	3.91	2.58	2.33	5	4.7	1.68421	3.33333	2.6	1.6	3.66667	2
1682	2	4	9	0	2.5	2.73	3.25	2.55	3	2.75	2.33	3.38	3.6	2.89474	1.16667			1	2.5
1683	2	4	9	0	2.42	2.45	3.92	3.18	2.64	2.92	1.67	3.13	1.8	3.31579	1.5	2.2	2.4	1.16667	2.33333
1684	2	4	9	0										1.73684	1.25	1.3		1.5	1.33333
1685	2	4	9	0	4.42	3.18	4.17	4.18	3.27	4.08	5.08	2.75	2.5	3.15789	1.16667	1.9	2.6	1.16667
1686	2	4	8	0	3.33	4	3.5	4.18	2.64	4.25	3.83	3.5	2.2	2.89474	1.16667		2.4	1.16667	2
1687	2	4	9	0	3.08	2.91	2.92	2.73	1.64	2.42	1.92	5.38	4.4	3.57895	1	1.5	2.2	1	2.83333
1688	2	4	9	0	3.75	2.73	3.33	2.82	2.91	3	3.42	4.88	3.3	2.31579	1.16667	2.1		1.33333	2
1689	2	4	10	0	3	3.09	3.17	3.09	3.73	2	2.5	5.13	3.8	3.52632	3.33333	3	3.8	2.33333	3.16667
1690	2	4	9	0	2	3.36	3.67	2.36	2.73	2.25	2.42	4.25	4.1	2.94737	2.41667	2.7	2.8	2.5	3.66667
1691	2	4	8	0	1.92	2.82	3.92	3.27	4.18	3.67	4.17	4.5	4.5	3.31579	1.16667	2.3	1.6	1	1.33333
1692	2	4	9	0	2.58	1.82	3.67	2.09	2.45	2.67	1.25	4.25	3.9	3.63158	1.33333	2.4		1.16667	3
1693	1	4	9	0	3.5	2.55	2	2.82	3.73	2.67	2.08	4.13	3.3	2.57895	1.41667	1.9		1.5	3.16667
1694	1	4	9	0	3.58	3.91	3.83	3.82	2.91	3.42	4.08	3.5	3.6	2.73684	1.08333	2.3		1.33333	3
1695	1	4	8	0	3.25	3.64	3	2.64	1.64	2.92	4.08	4.38	4.1	3.31579	2.41667	3.1		2.16667	2.66667
1696	1	4	9	0	3.25	2.55	2	2.09	2.73	2.42	2.5	5.13	4	2.52632	1.41667	1.7	1.8	1.5	2.16667
1697	1	4	9	0	3.58	2.27	2.58	2.09	3	2.17	2.42	3.5	5.2	3.15789	1.25	1.3		1	1.5
1698	1	4	9	0										3.21053	1.33333	1.7		1.33333	2.5
1699	1	4	9	0	4.25	3.18	3.08	2.45	2.82	2.92	2.83	3.88	4.1	3	1.16667	1.6		1	1.5
1700	1	4	9	0	2.67	2.73	3.25	2.55	3.55	2.42	3.08	3.63	3.2	2.73684	1	1.9	1.4	1	2.5
1701	1	4	9	0	2.5	2.45	3.92	2.73	3.36	3.17	1.83	4.75	4.5	3.26316	1.16667	1.8	2.4	1.16667	2
1702	1	4	9	0										2.78947	2.25	2.3		2	2.33333
1703	1	4	11	0	3.33	2.91	3.67	2.91	3.09	3.33	4	3.5	3.2		1	1.3		1	2
1704	1	4	9	0	2.08	3.55	3.17	2.82	2.18	3	2.67	3.25	1.6	2.31579	1.58333			1.33333	2.16667
1705	1	4	10	0	1.83	3	4.08	3.18	1.55	2.83	2	3.13	3.8	2.52632	1.66667	2.5	2.2	1.66667	2.66667
1706	1	4	10	0	1.67	2.36	5.5	4	2.45	3.58	2.67	4.25	4.5	3.42105	1	1.7	2		2.33333
1707	1	4	9	0	2.42	3.09	3.67	3.18	3.36	2.25	1.58	4	3.9	3.31579	1.83333	2.4		1.66667	2.66667
1708	1	4	10	0	1.33	2.36	2.92	1.64	2.09	2.5	1.83	3.25	3.5		1.16667	1.5		1	2.5
1709	1	4	9	0	3.25	3	3.75	3	2.91	2.67	3.25	3.75	3.2	2.57895	3.33333	2.4	1.6		2.16667
1710	1	4	9	0	2.92	2.91	3.58	3.18	2.91	3.42	3.42	4.38	3.6	3.10526	1.08333	2.1		1.33333	1.83333
1711	1	4	9	0										2.47368	2.91667	2.8		2.66667	2.16667
1712	1	4	9	0	3.08	3.27	3.42	3.91	3.73	3.17	3.25	4.5	3.5	2.57895	1.33333	2.1	2.2	1.5	2.16667
1713	1	4	10	0	3	3	3.75	3.18	3.55	2.42	3	3.75	3.5	2.94737	1.33333	1.8		1.16667	2.66667
1714	1	4	9	0	1.83	2.73	3.08	2.82	2.27	1.58	2.58	3.25	2.6	2.89474	1.08333	1.4		1	1.66667
1715	1	4	9	0	3.75	3.64	3.92	3.18	3.55	3.33	4	3.13	2.9	2.42105	3.5	2.3	3	2.5	3.5
1716	1	4	9	0	2.67	2.45	2.83	2.55	4	2.33	2.25	4.88	4.1	3.05263		2.6	2.2	2	2.83333
1717	1	4	9	0	3.58	2.91	3.17	1.82	1.91	1.33	3	4.13	3	3	1.5	1.8	2.8	1.5	2
1718	1	4	10	0	2.25	2.73	3.25	2.82	2.91	2.83	2.58	3.5	3.4	2.73684	1.5	2	1	1.5	2
1719	1	4	9	0	2	3.09	4.67	2	3	2.42	1.92	4.38	4	3.05263	1.75	2.2		2.16667	2.83333
1720	1	4	9	0	5.08	3.55	3.67	3.27	5.09	3.58	4.25	5.25	4.9	2.84211	1.58333	2		1.16667	1.33333
1721	1	4	10	0										2	1.41667	1.6	1.8	1.5	2
1722	1	4	9	0	3.75	3.73	3.42	3.27	3.36	3.58	4.17	3.5	3.4	3.31579	1.16667	2	3.4	1.16667	2
1723	2	4	9	0	2	2.73	2.75	3.64	2.91	2.33	1.33	3.88	2.5	2.68421	1.33333	2	2.8	1	2.16667
1724	2	4	9	0	2.92	2.55	3.25	3.27	2.82	2.83	2.33	3.63	3.4	2.31579	1.08333	1.8		1.16667	2
1725	2	4	9	0	1.92	2.91	3.5	3.36	3.09	3	2.5	3	4.3	1.78947	1.08333	1.4		1	1.16667
1726	2	4	9	0										2.26316	1.33333	1.4		1.33333	2
1727	2	4	8	0	3.58	2.09	2.08	1.55	4.36	1.75	1	4.75	4.3	2.84211	1.33333	1.9		1.5	2.16667
1728	2	4	8	0	2.58	2.09	3.75	2	2.36	2.75	1.67	4	2.9		1	1.7	2.4	1	2.16667
1729	2	4	9	0	3.25	3	2.83	2.73	4.27	2.83	2.5	3.25	3.7	3.10526	1.83333	2.6		1.83333	2.16667
1730	2	4	9	0	3.25	3.27	3.25	3.09	3.09	2.67	2.5	3.5	3.7	2.21053	1.25	1.3		1	1.66667
1731	2	4	10	0	2.33	3.36	3.25	2.64	2.91	3.42	2.25	3.88	3.5	2.42105	1.91667	1.9	1.8	1.5	2
1732	2	4	10	0	3.17	2.27	2.5	1.64	3.64	1.92	1.83	4.25	4	3.26316	1.16667	1.7		1.16667	1.66667
1733	2	4	9	0	2.92	3.27	3.58	2.64	2.09	2.92	2.75	2.88	2.9	2.78947	1.33333	1.9		1.33333	2
1734	2	4	9	0	1.5	2.27	4.08	1.27	2.36	2.42	1.42	4.38	4.4	2.84211	1	1.5		1.66667	2.16667
1735	2	4	9	0	3.58	2.91	3.08	2.36	3.91	3.42	2.75	4.5	4	3.26316	1.08333	2		1.5	1.83333
1736	2	4	10	0	2.58	2.64	3.5	3.55	3	3.25	2.58	4.5	4	2.63158	1.25	1.7	1.8	1.33333	2.16667
1737	2	4	8	0	3.17	4.36	3.25	3	3	3.25	2.5	4.75	3.3	2.47368	1.25	1.6	2.8	1.16667	1.66667
1738	2	4	9	0	2.17	2.45	3.92	2.64	2.82	2.25	1.33	3.88	5.2	3.26316	1.58333	1.7	3	1.66667	2.83333
1739	2	4	9	0	2.58	2.82	1.83	1.82	2.27	2.25	2.33	5.25	3.9	2.21053	1.25	1.7		1.33333	2.16667
1740	2	4	9	0	2.33	2.36	3.42	2.36	2.09	2.42	2	4.75	2.5	3	1.75	2.1	2.4	1.5	2
1741	2	4	8	0	3.5	3.27	2.67	2.18	3.27	2.58	2.33	4.13	3.5	3.10526	1	1.6	2.8	1.33333	2.33333
1742	2	4	8	0	2.33	3.55	2.58	1.64	2.18	2.17	2.17	4.88	3.7	2.78947	1.33333	2.2	2.2	1	2.83333
1743	2	4	9	0	1.42	2.91	3	2.55	2	1.92	2.42	4.13	3	2.21053	1.33333	2.1	1.6	1.33333	2
1744	2	4	9	0	2.83	3.82	3.33	2.73	2.82	3.25	2	4.38	4.6	2.73684	1	1.4	3.6	1.33333	1.83333
1745	2	4	9	0	2.25	2.73	4.33	2.18	2.82	3	2.33	4.5	3.7	2.52632	1.16667	1.7	3	1.5	2.33333
1746	2	4	9	0	2.92	3.91	3.33	3.64	3.36	3.58	3.25	3.75	3.1	2.21053	1.41667	1.2	2	1	1.83333
1747	2	4	10	0	1	2.64	2.75	2.55	1.09	2.42	1.75	5.13	3	2.63158	1.16667	1.6	1.4	1.33333	2.33333
1748	2	4	8	0	1.58	3.27	2.83	2.82	2.82	3.08	1.83	2.63	5	3	1.33333	2		1.16667	2.5
1749	2	4	9	0	2.5	3.09	3.42	3.27	2.91	3.17	2.83	4.5	2.4	2	1.16667	1.4	1.6	1.16667	1.33333
1750	1	4	10	0	1.92	2.91	3.42	2.09	1.91	2.75	2	3.63	2.8	2.10526	1.41667	1.3	1.6	1.83333	1.33333
1751	1	4	9	0	1.67	2.64	3.83	4.27	2.91	1.83	1.5	3.38	2.9	2.78947	1	1.5	2.2	1	2
1752	1	4	9	0	2.58	3.36	3.92	2.36	2.82	2.33	2.33	3.5	3.4	2.10526		2.1	2.2	1.83333	2
1753	1	4	9	0										2.26316	1.58333	1.8	2	1.66667	1.83333
1754	1	4	9	0	2.92	3.09	3.42	3.82	2.55	2.25	3.33	3.38	2.3	3.10526	1	1.9		1	1.66667
1755	1	4	9	0	3.42	3.91	3.25	2.73	3.09	2.08	2.92	4.38	3.1	2.78947	1.33333	1.7		1.66667	2.33333
1756	1	4	9	0	1.17	1.91	2.17	1.73	2.27	2	1.42	4.88	3.2	3	1.25	2		1.33333	2.66667
1757	1	4	10	0										2.89474	1.41667			1.66667	2.5
1758	1	4	10	0	4	3.27	3.75	4	3.36	3.08	3.58	3.38	3.8	3.52632	1	1.6		1	1.5
1759	1	4	9	0	3.33	4	4.08	2.45	2.55	2.92	3	4.88	3	2.47368	1	1.3	1.2	1	1.66667
1760	1	4	9	0	3.08	3.64	3	4.27	3.18	3.42	3.17	3.25	3.4	2.89474				1.66667	3.16667
1761	1	4	9	0	3.5	3.55	2.92	3	5	3.08	3.42	4.5	4	2.84211	2.91667	2		1.33333	2.83333
1762	1	4	9	0	2.25	2.18	2.67	2	3.09	2.42	1.92	3.75	3.9	2.47368	1.41667	1.5		1.33333	2
1763	1	4	9	0	2.25	2.91	3.25	3.36	2.09	2.58	1.58	4.75	4.1	3	1.58333	2.7		1.16667	2.5
1764	1	4	9	0	1.92	2.64	2	2.73	2.18	1.83	1.58	4.13	3.9	2.63158	1.25	2	2.6	1.33333	2
1765	1	4	10	0	3.08	3	4.33	1.45	2.27	2.67	2.33	3.25	3.2	3.05263	2.08333	1.9		1.66667	2.16667
1766	1	4	10	0	3.58	4.09	3.5	3.27	3.36	3.25	4.5	3	3.3	2.68421	2.75	1.6	2	1.66667	1.83333
1767	1	4	9	0	3	3.82	2.42	3.09	3.45	3.33	2.83	4.88	4.8	2		2.8		2.5	2.33333
1768	1	4	9	0	2.25	2.45	4.08	2.45	2.36	2.67	2.25	4	2.8	3	1	1.7		1.16667	2.33333
1769	1	4	9	0	2.33	3.18	3.5	3.36	2.55	3.33	2.42	4	2.3	2.68421	2.41667	2		1.16667	3
1770	1	4	9	0	4.25	3.36	3.67	4.27	3.82	3.42	3.25	4.25	3.7	3.21053	1.83333	2.7		1.66667	2
1771	1	4	9	0											1.83333	2.5	3.8	1	3.5
1772	1	4	10	0	2.42	1.91	3.25	3.27	2.18	2.58	2.5	3.88	2.7	2.68421	1.83333		1.8	1.66667	2.83333
1773	1	4	9	0	3.42	3.73	3.58	4.18	3.73	4.08	3.42	3.38	3.1	2.26316	1.83333	2.2	2	2	1.5
1774	1	4	9	0	3.83	3.91	3.67	3.91	3.73	3.75	3.33	2.88	2.9		1	1.5	2.2	1.66667	1.5
1775	1	4	9	0	1.92	2.64	2	2.73	2.18	1.83	1.58	4.13	3.9		1.83333	1.7	1.8	2.66667	2.5
1776	1	4	10	0	4.25	3.18	2.67	3.18	3.91	3.42	3.25	5	3	3.68421		3		2.5	2.16667
1777	1	4	9	0	3.33	3	2.75	2.91	3	2.83	3.75	3.63	3.7	3.36842	1.83333	2.2	1.4	1.83333	2
1778	1	4	10	0	2.08	4.45	3.75	4	2.55	3.5	4.08	3.25	1.9
1779	1	4	9	0	2.42	3.55	3.25	3.09	2.45	2.17	2.33	3.13	3.7	2.52632	1.33333	1.9	2	1.83333	2.16667
1780	2	4	9	0	2.58	3.36	3.08	3.36	2.36	2	2.5	4.25	3.2	2.84211		2	2	1.66667	2.5
1781	2	4	9	0	3.42	2.73	3.33	3.27	3.82	2.67	2.08	5.25	5.4	2.84211	1.41667	2.1		1.16667	3
1782	2	4	9	0	2.75	2.73	3.75	2.09	3.45	2.75	1.58	4	4.2	2.78947		1.6	1.6	1.16667	3.33333
1783	2	4	9	0	2.92	4.09	3.67	3.64	3.82	3.33	3.42	3.38	3.5	2.10526	1.75	1.5	2.2	1.66667	1.5
1784	2	4	9	0	3.17	3.18	3.25	2.64	3.55	3	2.75	3.38	2.3	2.73684	1.08333	1.6		1.16667
1785	2	4	10	0	3.58	4.27	1.83	3.27	3.91	2.67	3.92	5.13	3.8	2.52632	2.66667	2.3	2.4	1.33333	2.66667
1786	2	4	9	0	1.67	2.09	2.67	4	3.27	2	1.83	4.25	2.1	1.94737	1.08333	1.5	1.6	1	1.83333
1787	2	4	9	0	1.75	2.45	3.67	2.27	3	3.58	2.83	4.13	1.8	2.47368	1.25	1.2	1	1.16667	1.83333
1788	2	4	9	0	3.25	3.36	3.42	3.64	3.55	3.17	3.58	4	3.7	3	1.41667	1.7		1.66667	2
1789	2	4	9	0	1.25	1.55	4.42	1.73	1.36	2.58	1.75	3.63	3.5	2.57895	1	1.9		1	2.33333
1790	2	4	9	0	1.92	2.64	3.42	2.27	2.55	2.67	1.75	4.75	4	2.84211	1.08333	1.9	1	1.16667	1.83333
1791	2	4	9	0	2.25	2.91	2.83	3.27	2.64	2.08	2.58	4.13	3.1	1.89474	1.58333	1.5	2.2	1.66667	2.16667
1792	2	4	9	0	1.92	2.45	3.5	2.73	2.09	3	2.25	3.63	2.9	2.89474	1	1.7		1	1.5
1793	2	4	9	0	3.58	3.64	3.67	3.55	4.18	3.83	3.42	3.75	3.8	3	1.08333	1.8		1.16667	2.16667
1794	2	4	9	0										2.36842	2.75	1.7	3	1.66667	2.83333
1795	2	4	9	0	3	2.91	4.08	3.18	4.18	2.58	2.5	4.38	4	2.42105	1.41667	1.8	2.6	1.5	2.16667
1796	2	4	9	0	3.08	2.91	4	2.82	3.45	2.75	2	4.88	3.8		1.33333		2.2	1.83333	1.66667
1797	2	4	9	0	2.25	2.73	2.17	3.09	2.36	2.33	2.5	2.88	3.2	3.15789	1.33333	1.5		2	1.83333
1798	2	4	9	0	3.42	2.82	3.5	2.64	4.55	3.08	3.92	5.25	3.2	3.47368	1.33333	2.1	1.6	1.16667	2.5
1799	2	4	9	0	3	3.09	3.67	2.73	3.82	2.58	2.67	3.88	4.3	2.94737	1.16667	2		1	2.5
1800	2	4	9	0	2.33	2.91	3.42	1.45	3.64	2.33	1	4.38	4.2	2.26316	1.25	1.6	1.4	1	2.16667
1801	2	4	9	0	3.92	3.36	3.83	3.91	4	2.67	2.58	3.38	4	3.36842	1.33333	1.4	2.4	1	1.83333
1802	2	4	9	0	3	3.09	3.67	3.82	2.91	4.42	3.25	3.38	2.7		1.83333	2.1	3	1.16667	2
1803	2	4	9	0	2	2.45	3.58	2.27	3.45	2.25	2	4.5	4.7
1804	2	4	9	0	2.83	3	3.67	2.55	2.82	2.33	2.42	4.38	4.1	2.21053	1.16667	1.8	1.4	1.33333	2
1805	1	5	11	0	3.17	3.55	3.25	3.09	3.64	3.83	3.67	3.63	3.8	2.89474	1.08333	2.3		1	3.33333
1806	1	5	10	0	3.5	3.45	4	3.36	3.18	3.58	3.67	4.13	3.4	2.26316	1.91667	2.7		2.16667	2.16667
1807	1	5	10	0	3	2.73	1.83	2.09	1.91	2	1.75	3	2.4	3.31579	1.16667	1.8		1.5	1.83333
1808	1	5	10	0	2.83	2.91	3.58	2.73	3.36	2.67	1.92	4	3.9	3.42105	1.16667	2.1	2.8	1.33333	2.66667
1809	1	5	10	0										1.52632	2.33333	2	1	1.83333	2.5
1810	1	5	10	0	2.75	3.27	3.5	2.73	2.55	2.83	2.5	3.5	3.7	3.21053	1.16667	1.7	1.2	1.16667	1.83333
1811	1	5	10	0	3.25	3.64	2.58	1.82	2.36	2.25	2.17	4.5	4.1		1.25	1.7		1.66667	2.5
1812	1	5	9	0	2.75	3.64	3.25	2.45	3.09	2.75	2.58	3.5	4	3.31579	1.25	2.8		1.16667	2.66667
1813	1	5	10	0										3.05263	1.75	2.6	1.4	1.5	2.66667
1814	1	5	10	0	3.25	2.09	2.5	2.18	2.27	3.67	2.17	4.5	2.8	3.15789	1.41667	1.9	1.6	1.33333	3
1815	1	5	10	0	2.25	3.27	2.83	1.91	3	2.25	2.92	4.5	2.5	2.73684	2.16667	2.2			2.83333
1816	1	5	10	0	2.17	2.82	3.5	2.82	3.27	2.92	2.25	4.63	3.4	2.42105			1.2		2.5
1817	1	5	11	0	1.75	2.64	3	1.45	2.09	1.83	1.58	2.38	3.3		1	1.5		1.33333	1.83333
1818	1	5	10	0	2.25	2.91	2.83	3.27	2.64	2.08	2.58	4.13	3.1	1.78947	2.16667	1.9	1.4	1.83333	2.33333
1819	1	5	10	0	2.67	2.82	2.17	2.73	2.73	3.33	2.58	4.5	3.9	3.05263	3.08333	2.6		2.33333	3.16667
1820	1	5	11	0	2	2.45	2.58	1.55	2.91	1.83	2	4.63	5.1	3.31579	1.33333	2.4	1.6	1.33333	2.66667
1821	1	5	11	0	1.25	2.55	2.17	1.27	2.73	1.67	1.17	3.88	4.7	2.63158	1.08333	1.6		1	2.33333
1822	1	5	9	0	2.17	2.09	2.83	2.64	2.09	2.42	1.5	5.13	3.9	2.26316	2.58333	2.2		3	2.83333
1823	1	5	11	0										2.42105	1.08333	1.7	1.6	1.5	1.5
1824	1	5	10	0	2.83	2.73	2.92	2.55	2.82	1.83	1.92	4.63	5.2	3.15789	1.25	2.5		1.83333	2.16667
1825	1	5	11	0										2.47368	1.66667	2.4		1.66667	2.83333
1826	1	5	11	0	2.42	2.45	3.67	3.64	3.45	2.42	3.42	4.38	2.9	2.47368		2.2		2.5	2.5
1827	1	5	10	0	2.17	3.18	3.58	3	2.82	2.17	2.5	3.13	3.2	2.47368	1.5	1.8	2	2	2.66667
1828	1	5	10	0	3.42	3.36	3.58	3.36	3.73	3.25	3.33	4.63	4.8	2.31579	1.83333	2	1.6	1.83333	2.16667
1829	1	5	11	0	2.25	1.73	4.17	1.27	1.18	2	2.67	3.63	3.6	2	1.16667	1.9		1.16667	2.5
1830	1	5	10	0	2.92	2.64	2.42	1.91	2.45	2.08	2	3.88	3.3	3.31579	1	1.9	1.4	1	2.33333
1831	1	5	10	0	3.33	2.36	3.42	3.09	3	2.92	3.42	4.13	3.8	2.47368	1.08333	1.4	1.8	1.33333	1.83333
1832	1	5	10	0	3.5	4	3.92	3	1.73	2.92	3.58	3.88	2.9	2.89474	1.41667	2.4	2	1.33333	2.66667
1833	1	5	10	0	2.75	3.64	3.25	2.45	3	3.17	2.67	3.5	3.9	2.73684	1.91667	2.4	2.4	1.33333	2.83333
1834	2	5	10	0	2.92	2.73	2.67	3.73	2.27	2.67	2.25	3.75	3	2.26316	1.08333	1.5	1	1.33333	1.5
1835	2	5	10	0	1.83	1.73	3.08	1.91	3.55	3.25	2.42	5.38	4.8		1.08333	1.4		1.16667	1.66667
1836	2	5	10	0	2.42	3.18	3.67	3.09	2.73	2.92	2.67	2.88	3.1	2.10526	1.25	1.9	1.6	1.5	1.83333
1837	2	5	10	0	3.17	2.36	3.42	1.73	2.18	1.75	1.58	4.25	3.6	2.26316	1.25	1.7		1	1.66667
1838	2	5	10	0	2.08	2.73	3.08	2.45	3.36	2.83	2	3.13	4	3.05263	1.75	2.2		1.5	2.66667
1839	2	5	11	0										2.31579	1.25	1.7	2.4	1.16667	1.33333
1840	2	5	9	0										3.63158	1.33333	2.5	2.2	1	3.16667
1841	2	5	10	0	1.42	2.55	4.58	2.18	2.09	2.83	2.08	2.88	3.2	3.84211	1	1.8		1.16667	2.33333
1842	2	5	10	0	2.58	3.36	3.67	3	3.73	3	2.25	4	3	3	1	1.7	3	1.33333	3
1843	2	5	10	0	1.42	2.64	2.67	1.64	1.91	1.67	1.42	2.38	2.1	3.21053	1	1.2		1	1.5
1844	2	5	10	0	3.42	2.27	2.92	3.91	3.55	2.83	2.58	3.38	3.7	3.05263	1.58333	2.2		1.66667	2.5
1845	2	5	10	0	1.5	2.45	2.83	1.64	2.27	2	1.17	3.5	4.8	3.57895	1.5	2.7		1.5	3
1846	2	5	10	0	2.5	3.27	3.17	2.73	2.91	2.67	2.5	4	3.7	2.68421	1.16667	1.7	1.6	1.16667	1.33333
1847	2	5	10	0	1.5	2.09	2.92	1.64	1.18	2.17	1.92	3.25	3	2.73684	1.08333	2.1	2.8	1.16667	1.83333
1848	2	5	10	0	3.33	3.82	3.33	3.64	3.45	3.58	3.25	2.63	2.7	2.42105	1.5	1.8	1.8	1.83333	2
1849	2	5	10	0	1.92	2.45	3.42	1.64	1.55	2.25	2	4.5	3.5	2.73684	1	1.8	2.8	1	1.66667
1850	2	5	10	0	3.08	2.82	2.42	2.36	3.27	3	2.33	4.5	4.2	2.10526	1.08333		2	1.33333	1.83333
1851	2	5	10	0	2.08	3.18	3.25	3.55	1.91	3.08	2.25	2.88	2.6	2.84211	1.16667	1.9	1.2	1.16667	1.83333
1852	2	5	10	0										3.47368	1.08333	1.6	3.8	1.16667	2.16667
1853	2	5	10	0	3	2.73	2.42	2.55	3.36	3.42	2.5	4.63	4	2.68421	1.33333	1.7		1.5	2.33333
1854	2	5	10	0	2.33	2.82	3.33	2.45	4.09	2.17	2.33	4.5	4.9	2.47368	1.58333	1.7	1.4	1.83333	2.33333
1855	2	5	10	0	2.42	2.73	2.58	2.36	4	3.17	2.58	4.5	4.5	3.52632	1.33333	1.5		1.5	1.5
1856	2	5	11	0	3.5	2.91	3.17	3.55	3.82	2.58	3.5	4.25	4.2	1.84211		1.8		1.83333	1.5
1857	1	5	9	0	2.92	3.36	2.75	2.36	3.36	2.83	2.25	4.5	3.6	2.78947		2.2		2.33333	3.5
1858	1	5	11	0	3.75	3.36	3.17	3.36	3	3	2.75	4.38	3.5	2.89474	1.83333	2.5		2.16667	2.5
1859	1	5	10	0	2.25	3.18	3.17	3.64	3.27	3.25	3.83	3.75	2.8	2.21053	1.75	3.2	1.8	2.33333	2.5
1860	1	5	10	0	2.92	3.09	3.58	3.27	2.91	2.83	2.58	3.75	4.1	2.21053	2.33333	3		3.16667	3
1861	1	5	10	0	2.17	2.55	3.83	2.64	2.45	2.75	1.92	4.13	5.6	2.73684	1.66667	2.3		1.83333	2.5
1862	1	5	10	0	3.17	2.36	3.5	2.73	2.45	3.58	3.67	4.88	4.3	2.21053	1.41667	1.9		1.5	1.66667
1863	1	5	10	0	3.67	3.27	3.5	3.64	3.18	3.5	2.92	4.63	4.5	2.21053	2.33333	1.7	1.6	1.5	1.83333
1864	1	5	10	0	3.5	3.55	3.67	3.18	4.27	3.5	3.58	3.63	3.8	3.57895	1.16667	1.9		1.33333	1.33333
1865	1	5	11	0	1.92	2.36	2.67	3.36	3.45	2.92	2.25	5.38	2.4	2.84211	2.5	2.9		2.83333	3.33333
1866	1	5	10	0	3.75	3.91	3.25	3.09	3.27	3.67	3.83	3.13	3	2.10526	1.5	1.6	2	1.16667	1.5
1867	1	5	10	0	3.83	3.36	3.83	3.82	3.09	3.25	3.25	3.38	3.2	3.31579	2.41667	2.9	1.6	2.33333	3.16667
1868	1	5	10	0	2.33	2.91	2	2.73	3.45	1.83	1.5	5.25	3.6	3.05263	1	1.4		1.5	1.5
1869	1	5	10	0	3	3.18	3.92	3.55	3.64	3.33	3.5	4.25	4.2	2.47368	1.5	1.5	2.8	1.5	2.33333
1870	1	5	10	0	2.92	3	3.08	2.55	3.64	2.42	2.67	4	4.3	2.36842	2.91667	2.2	1.8	3.16667	3.33333
1871	1	5	10	0	2.5	2.73	3.08	2.27	2.45	1.42	1.67	4.38	3.6	2.68421	1.41667	1.7		1.33333	1.83333
1872	1	5	10	0	3.5	3.91	3.17	3.64	3.64	3.17	3.42	3.38	3.9	3.15789	1	1.5	1	1	2
1873	1	5	10	0	3.17	3.36	3.25	3.18	2.82	3.83	3.17	3.88	3	2.36842	1	1.8	1.4	1.5	1.66667
1874	1	5	10	0	3.75	4.36	3.25	3.55	3.55	3	3.25	4.25	2.9	2.47368	1.66667	2	3	1.83333	3
1875	1	5	10	0	1.25	1.91	2	1.82	1.91	1.5	1	4	2.4	2.68421	1.16667	2.2	1	1.16667	1.66667
1876	1	5	10	0	1.75	2.73	3.25	3	2.18	2.25	2.42	4.13	2.6	2.57895	1.33333	2.5		1.5	2.83333
1877	1	5	10	0	2.42	2.45	4.33	3	3.27	2.92	2.08	4.75	3.8	2.84211	1.41667	1.8	3	1.66667	2.5
1878	1	5	10	0	1.5	1.55	2.5	1.91	1.55	2.08	1.08	5.25	3.3	3.10526	1.41667	2.6	2	1	3
1879	1	5	11	0	1.58	3.18	3.42	2.09	1.82	2.75	2.33	3.88	2.3	2.36842	1.41667	1.8	2.4	1.16667	2.5
1880	1	5	10	0	3.25	2.27	1.83	3.91	2.91	1.5	1.67	4.5	3.8	3.15789	1.5	2		1.16667
1881	1	5	10	0	2.75	2.64	2.75	4.18	2.82	3.25	2.17	3.63	4	2.89474	2.25	2.9		3	3.16667
1882	1	5	10	0	2.67	3.73	3.25	2.82	3	3.25	4.42	4.63	4.3	3.31579	1.33333	2		1.33333	2.33333
1883	2	5	10	0	2.58	3	3.33	2.27	3	2.5	2	4	2.5	2.94737	1	1.6	2.4	1	1.5
1884	2	5	10	0	2.75	2.36	2.67	2.18	2.09	1.83	2.42	4.63	3.3	2.57895	1.25		2	1.16667	2
1885	2	5	10	0	2.67	3.18	3.17	2.82	3.45	3.25	2.08	4.75	3.1	3.63158	1.08333	2.1	3.4	1	2.16667
1886	2	5	10	0	3.42	3.36	3	3.09	3.73	2.92	2.75	4.38	3.9	1.94737	1.5	1.6	1.2	1.16667	1.83333
1887	2	5	10	0	3.42	3.36	3.92	3.91	3.91	2.92	4.08	3.13	3.3	3	1.66667	1.4		1.5	1.5
1888	2	5	10	0	2.33	3.09	2.75	2.73	2.82	2.83	2.92	4.63	4.2	2.73684	1	2.2	2	1	1.83333
1889	2	5	10	0	2.33	2.18	3.25	2.82	3.36	2.83	1.75	4.25	4.9	3.10526	1.25	1.5	1.2	1.16667	1.33333
1890	2	5	10	0	1.83	2.91	2.83	1.82	1.91	2.83	2.25	5	4.1	3.57895	1.33333	2.7		1.16667	2.16667
1891	2	5	10	0	3	2.64	3.08	3.36	2.18	3.25	2.58	4.13	3	2.21053	1.25	1.8		1.5	2.16667
1892	2	5	10	0	2.67	3.09	2.92	2.82	2.45	2.58	2.42	4.13	3.7	2.36842	1.91667	2.3		2.66667	2.5
1893	2	5	10	0	2.5	4	3.42	3	2.55	2.25	2.92	4.13	3.1			2.4	1.4	1.66667	3.33333
1894	2	5	10	0	2.25	2.45	4.08	3.18	2.45	3	2.75	3.75	4.1	2.42105	1.5	1.7	2.2	2.16667	1.83333
1895	2	5	10	0	2.17	3.36	3.42	3.55	1.73	2.92	2.5	3.63	1.8	2.10526	1.41667	1.6	1.4	1.33333	2.16667
1896	2	5	11	0	2.67	3.18	3.17	3	3.36	3.58	2.92	3.13	3.6	3.05263	1.16667	1.7	1	1.5	2.16667
1897	2	5	10	0	3.33	3	2.67	2.64	3.91	2.42	2.92	4.25	4	3.52632	1.16667	2.3		1.5	1.66667
1898	2	5	10	0	1.75	3.27	3.92	2.64	1.27	3.75	2.42	2.5	2.5	2.05263	1.41667	1.5		2	2.33333
1899	2	5	11	0	2.08	2.18	2.83	2.64	1.91	2.17	1.58	4	3.4	3.21053	2.25	2.5	1.6	1.33333	2.5
1900	2	5	10	0	2.08	3	2.83	3	3.18	1.75	2.58	5	3.9	2.94737	1.08333	2.3	2	1.16667	1.66667
1901	2	5	10	0	2.67	3.36	3	3.91	1.91	3.33	1.83	3.13	1.6	2.31579	2.58333	1.2	1.4	1.33333	1.16667
1902	2	5	10	0	3.83	2.82	4.25	3.18	4.27	2.25	2.5	4.63	5.2	1.78947	2.16667	1.5	1.2	1.5	2
1903	2	5	11	0	2.92	3.55	3.5	3.27	3.18	3.08	3.25	3.88	3.5	2.47368	3.41667	2		1.83333	2.83333
1904	2	5	10	0	2.5	3	3.5	2.36	2.82	2.17	2.42	3.75	3.2	3	1	1.8	1.4	1	1.16667
1905	2	5	10	0	2.75	2.82	3.83	2.45	3.18	2.67	2.58	3.75	3.7	2.73684	1.5	1.8		1.66667	2.16667
1906	2	5	10	0	2.33	2.45	3.75	2.73	3.18	1.92	1.75	3.13	3.7	2.89474	1.16667	1.6		1	2.33333
1907	2	5	9	0	4.08	2.91	1.33	2.73	4	2.58	1.67	4.13	4.2	3.26316		1.9		1	2
1908	2	5	10	0	3.75	3.18	2.42	2.82	3.36	2	3.33	4.38	3.8	2.42105	1.16667	1.9	1	1.83333	1.66667
1909	1	4	9	0	2.75	2.55	4	3	1.55	2.42	1.83	3.38	1.9		2.08333	2.9	2.4	2.16667	2.33333
1910	1	4	11	0	3.17	2.55	3.75	2.55	2.73	3.08	2	3.13	2.6	2.68421		2.1	2.4	1.16667	2.33333
1911	1	4	9	0	4.33	4.09	1.92	3.36	3.73	2.58	3.5	5.38	3.8		1.66667	2.3	2.2		2.33333
1912	1	4	9	0	3.33	3.64	3.5	3.27	3.36	3.08	3.42	3.25	4				2.2	1.16667	2.16667
1913	1	4	10	0	3.58	3.36	2.92	2.55	3.73	2.75	2.5	3.88	2.8				1.8		2.83333
1914	1	4	9	0	3.42	3.09	3.42	2.91	4.09	2.92	3.33	4.75	3.7	2.26316		2.1		2	2.5
1915	1	4	9	0	3.75	3.18	2.33	3.09	3.73	2.92	2.67	4.75	4	2.94737	2.41667	1.7		2	2.83333
1916	1	4	9	0	2.5	2.27	4.08	2	2.45	2.42	1.92	3.75	3.6		1.08333	1.3		1.16667	2.16667
1917	1	4	9	0	3.75	3.91	4	3.27	3.82	3.17	2	3.63	3.9					2	3.33333
1918	1	4	10	0	3.17	3.09	3.33	4.09	2.91	3.33	3.17	2.88	1.6			1.8	2.6		1.33333
1919	1	4	10	0	3.58	4	3.25	3.45	3.64	3.75	2.92	4.38	3.7	1.94737	3.5	2.6		4	2.5
1920	1	4	9	0	4	3.45	2.58	3.36	3.73	3	3.83	3.75	3.2	2.10526	1.75	2		2	2.16667
1921	1	4	9	0	2.58	3.18	4.33	3.36	2.27	3.58	3.33	3.25	2.6		2.58333		2.4	3	2.83333
1922	1	4	9	0	3.17	3.36	3.08	3.18	3.91	3.17	3.17	3.63	3.3	3.68421	1.16667	2.2	1.6	1	2.33333
1923	1	4	9	0	2.75	3.18	3.67	2.09	3	2.33	1.75	3.88	3.4		1	1.7	3.4	1	2.16667
1924	1	4	10	0	3.58	4.09	3.92	3.82	3.55	3.67	3.58	2.75	3.4		1.83333	2.1	2.4	1.5	2
1925	1	4	10	0	2.92	3	2.33	2.45	1.82	2.92	2.5	4.25	3
1926	1	4	9	0	3.42	4.18	3.75	3.09	2.82	3.25	3.67	4.5	3.6	3.26316	1.25	2.1	1.8	1.5	2.33333
1927	1	4	9	0	3.5	2.36	3.33	2.09	3.82	2.33	2.83	5	4.1	2.47368	1.25	1.9	2.2	1.83333	2.83333
1928	1	4	9	0	3.75	3.45	3.33	3.18	3.73	3.08	3.25	4.13	3.8	3.26316	1.08333	2.1	1.4	1.5	3
1929	1	4	9	0	2.92	3.09	3.17	3.18	3	3.25	2.58	4.25	3.8	2.47368	1.41667	2.3		1.83333	2.5
1930	1	4	9	0	3.42	3.45	3.42	3.82	3	3.42	3.33	3.38	2.5	2.15789	2.75			2.83333	2.5
1931	1	4	9	0	4.25	3.36	2.5	2.82	4.55	2.42	3.17	4	4.6		2.08333	2.4		2.66667
1932	1	4	10	0															2.16667
1933	1	4	10	0	3.08	3.18	2.33	2.09	4.73	2.25	2.42	3.75	4	3	1.25	2.2	1.8	1.33333	1.83333
1934	1	4	9	0	4	2.82	3.08	4	3.09	3.58	3.75	3.63	4.5	2.52632	2.66667	2.3		2.5	3.33333
1935	1	4	9	0	3.42	3.09	2.42	3.82	2.64	1.92	2.83	4.13	3.6	3.63158			3.2	1.5	3.33333
1936	1	4	9	0	3.42	3.91	3.33	3.36	3.91	3	3.17	3.75	3.2	3.31579	2				2.83333
1937	1	4	9	0	1.75	3.45	3.58	2.55	3.18	2.92	2.58	2.25	3.1			2.2	2.4	1.16667	2.33333
1938	2	4	9	0	2.33	3.27	3.42	2.55	2.64	1.83	2.17	3.5	2.6	2.73684	1.33333	1.7	1.8	1.16667	1.83333
1939	2	4	9	0	3.17	3.82	3.67	3	2.91	3.75	3.92	3	2.7			2.3		1.5	2.66667
1940	2	4	9	0	3	2.55	3.75	2.18	2.27	2.83	1.67	5.38	3.9	2.68421	1.25	2.4	2.8	2.66667	3.5
1941	2	4	8	0	3.5	3.36	2.33	2.64	4.09	2.58	2.17	4.5	4.2	3.31579					2
1942	2	4	9	0	1.83	3.45	3.08	1.82	3.18	2.08	1.83	4.75	4.3	3	1.25	2.1	1.2	1	3
1943	2	4	9	0	2.33	2.36	3.17	2.18	1.91	1.75	1.58	4.13	4		1.08333	1.6		1	2.5
1944	2	4	9	0	2.17	3.91	2.58	2.36	2.55	2.58	1.92	3.75	3.3		2.75	1.5		1.83333	3.5
1945	2	4	9	0	2	2	2.58	2.09	2	2.25	1.58	4.88	2.8	3.26316	1.16667	2.9	2.6	1.66667	3.16667
1946	2	4	9	0	1.75	3.45	3.58	2.73	3.18	2.92	2.92	2.25	2.9	2.84211	1.08333		1.2	1.16667	1.5
1947	2	4	9	0	2.67	3.73	2.33	1.91	2.91	3.92	2.25	4.5	3.8	2.94737	1.5	2.2	2.6	1.5	2.33333
1948	2	4	9	0	2.42	3.27	3.08	2	3	2.17	1.67	3.88	3.6	2.73684	2.58333	2.1		1.33333	2.16667
1949	2	4	8	0	3.67	3.73	4.42	4.18	2.55	3.33	3.17	3.75	2.2
1950	2	4	9	0	3.42	3.18	3.33	4.09	3	3.75	3.17	3.25	2.8		1.08333		2.4	1	2.5
1951	2	4	9	0	2.83	3	2.92	3	2.82	3.08	2.67	2.88	1.9	2.10526	2.33333	1.9		1.66667	2.5
1952	2	4	9	0	2.5	2.09	3.5	2.18	3.27	2.67	1.83	4.25	3.4	2.68421		2	2.2	1.5	2.66667
1953	2	4	9	0	2.33	2.45	3.42	3.45	2.91	2.58	3.25	4	3.6					1.83333	1.83333
1954	2	4	9	0	3.42	2.55	2.42	2.45	3.18	2.42	1.92	4	3.1	2.42105	2	2.1	1	1.83333
1955	2	4	9	0	4.17	3.55	4.92	3.82	4.45	4.25	5.42	4	3.2		2.58333	2.2		1.83333	2.5
1956	2	4	10	0	3.33	3	3.17	3.55	3.18	4	3.75	3.25	3.3	2.94737		2	3	1.16667	1.66667
1957	2	4	9	0	2.5	2.64	3.58	2.27	2.09	2.33	2.5	4.75	3.3	3.15789	1.25	1.8		1.33333	2.83333
1958	2	4	9	0	2	2	2.58	2.09	2	2.08	1.58	4.88	2.8	2.94737	1.83333	2.6	3	1.16667	2
1959	2	4	10	0										2.68421	1.83333	2.2		1.33333	2.5
1960	2	4	9	0	2.5	3.82	4.67	3.27	2.27	3.17	2.92	4.13	3.4	1.94737	2.41667	2.6	1.8	3	2.5
1961	2	4	9	0	1.92	2	2.17	1.82	3.64	3.25	1.75	2.25	4.4		1.25	1.9	1.2	1	1.16667
1962	2	4	8	0	3.5	3.55	3.75	3.09	4.36	3.5	3.33	3.75	3.7	2.52632	2.16667	1.8	2.2	1.83333	2.66667
1963	2	4	9	0	4	2.91	2.75	2.64	3.64	3.08	3	4.25	3.2	2.73684			3.4	1.33333	2.66667
1964	2	4	9	0	3.58	2.73	3.25	2.45	3.64	1.75	2.75	4.13	4.1	2.78947	1	1.7	2.4	1.33333	1.5
1965	1	4	9	0	4.25	3.64	3.5	3.09	2.36	2.92	3.17	5	2.4	3.21053	2.75	2.8		2.83333	3.5
1966	1	4	9	0	2.42	2.18	3.17	2.36	3.27	2.33	2.25	3.63	3.6	2.68421	1.08333	1.9		1.16667	1.16667
1967	1	4	9	0	3.17	3.73	2.92	2.64	4.36	3.08	2.58	3.63	3.7					1	2.33333
1968	1	4	9	0	4.92	3.64	3.92	3.64	4.64	2.75	1.83	4.63	3.6	2.89474	1.08333	1.6	2		1.66667
1969	1	4	9	0	3.75	3.64	2.75	3.09	3.73	3.33	3.42	4.25	3.8	2.78947	1.33333	1.6	2.2	1.83333	1.83333
1970	1	4	9	0	3.08	3.18	3.17	4.09	2.45	3.08	3.17	2.63	2.2	3.15789	1.08333	1.9		1	2.5
1971	1	4	9	0	3.58	3	2.83	3.55	3.18	2.83	3.42	4.5	3.2		2.16667	2	2	1.16667	2.66667
1972	1	4	9	0	3.5	3.36	4.58	3.18	4.45	3.83	3.67	4.63	3.7	2.94737	1.25	2.4	2.2	2	2.5
1973	1	4	8	0	2.75	3.55	2.58	3.18	3.55	2.67	2.17	3.88	3.5	3.21053		3	3	1	2.5
1974	1	4	9	0	4.17	4.27	4.5	2.82	3.09	3.08	3.67	4.63	3.8	3.21053	1	2.8		1	2.5
1975	1	4	9	0	2.5	2.73	2.5	2	2.82	3	2	3.38	2.9	3.21053		2	2.2	1.16667	1.66667
1976	1	4	9	0	2.92	2.45	3.42	2.27	3	2.75	2	4.88	3.3		1.25	2.6		1.5	1.5
1977	1	4	9	0	2.67	3.36	3.08	2.36	2.73	2.67	2.33	4	3.2				1.6
1978	1	4	9	0	4.17	2.73	3.75	2.55	2.55	2.92	2.17	4.5	3.4	2.73684	1.33333	2.2		1.16667	1.5
1979	1	4	9	0	2.67	2.82	3.67	3.18	2.82	3.17	3.5	4.63	3					2.5
1980	1	4	9	0	4.58	3.64	2.75	2.91	3.64	3.17	3.5	4.13	1.8	3.36842	1			1.16667	1.83333
1981	1	4	9	0	3.92	4.09	3.58	3.64	3.45	3.5	4.25	4.63	3.6	2.15789	2.16667	2.1	2	2	2.5
1982	1	4	9	0	1.75	2.27	3.83	1.45	3.18	1.58	1.17	3.88	3.2	2.36842	1.33333	1.3	1.6	1.33333	1.5
1983	1	4	9	0	3.33	3.27	3	2.45	3.18	3.17	2.33	3.75	3.3	3	1.83333	1.8	3.4	2.16667	3
1984	1	4	10	0	3.42	2.64	4.67	3.18	4.09	3.42	2.33	5	4.5	2.26316	1.5	2.1			2.16667
1985	1	4	9	0	3.83	3.55	3	3.09	3.73	2.83	3.25	4.38	3.9	3		2.4	2.8		3.16667
1986	1	4	9	0	3.92	4.18	3.92	3.45	4	3.42	3.75	4.63	4.3	2.31579		2.1	2.6	1.33333	2.33333
1987	1	4	9	0	2.5	3.55	3	3	1.45	3.5	2.08	5.13	3.7	2.36842	2.25	2.6	1.4	1.83333	1.83333
1988	1	4	9	0	3	3.55	3.08	2.73	1.91	2.83	2.75	3.75	2.8	1.73684	2.08333	1.9	2.2	2.5	2
1989	1	4	9	0	2.5	2.55	2.25	1.64	2.09	1.75	3.17	4	3.2	2.73684	1.75	1.8		2.16667	2
1990	2	4	9	0	4.83	4	2.67	3.64	5.09	2.92	3.67	4.88	4.1		1.83333	2.2	1	1.16667	1.66667
1991	2	4	9	0	2.33	3	3.67	2.45	2.09	2.33	1.83	4.38	3.9	2.42105	1.08333		2.2	1
1992	2	4	9	0	1.75	2.45	4	3.64	1.45	3.58	1.58	3.63	2.7	2.15789	1.41667	1.6	1.2	1.5	2
1993	2	4	9	0	1.67	2.55	3.58	2.36	1.82	2.42	2.25	2.38	1.7	2.10526	1	1.3		1.33333	1.16667
1994	2	4	8	0	3.25	3.45	3.5	3.64	3.09	3.92	3.25	3.63	3	1.84211	1.41667	1.7	2.4	1.5	2.33333
1995	2	4	9	0	2.83	2.18	5.25	3.45	2.91	2.83	1.92	3.38	2.9	2.68421	1.08333			1	2.5
1996	2	4	10	0	2.17	2.91	2.67	2.18	3.82	2.58	2.5	5.75	5	2.47368	1.25	1.5	2.2	1.5	2.33333
1997	2	4	9	0	1.92	2	2.08	1.09	2.82	1.08	1	4.63	4	3.52632	1.16667	1.9		1.16667	2
1998	2	4	9	0	2.08	3.36	2.75	2.73	3.45	2.5	2.5	4.63	4.3	3.15789	1.25	1.7	2.2	1.33333	2.5
1999	2	4	9	0	3.08	3.36	3.42	3.73	2.45	2.5	3.58	4.25	3.9	3.10526	1.66667	1.8	1.6	1.16667
[truncated: 851 more rows]

## Sheet: Value
NO.	Gender	Grade	Age	Recurrent UIs	Activity	Predictability	Approach	Adaptability	Intensity	Mood	Persistence	Distractibility	Threshold	Emotional warmth	Punishing	Over-interference	Favoritism	Rejection	Overprotection
1	Male	Grade 4	10	Yes	3.75	3.45	2.42	2.73	4	3	3.33	4.25	3.7	3.15789		2.6	2.6	2.83333
2	Male	Grade 4	9	Yes	3.08	3	4.92	3.36	3.18	3.25	3.42	3	3.7			2.3	1.6	1.66667	3
3	Male	Grade 4	10	Yes	2.58	3.36	2.33	3	3.55	2.83	3.33	4.13	3.4	2.21053		2.6		2.83333	2.33333
4	Male	Grade 4	9	Yes	3.92	2.91	2.5	2.36	3.18	3.17	2.42	3.5	3	1.78947	2.5	2.7	2	2.5	3
5	Female	Grade 4	10	Yes	2.58	2.91	3.33	2.09	3	2.25	1.92	3.38	4.1	3	1.66667	2.4	2.4	1.33333	2
6	Male	Grade 4	10	Yes	3.25	4.09	4	3.09	3.73	3.25	3.25	4	3.6			2.3	2
7	Male	Grade 4	9	Yes	3.25	3.18	2.08	2.82	2.91	2.75	3.08	4.13	3.1		1.66667	1.7		1.5	1.66667
8	Male	Grade 4	11	Yes											1.83333		1.4	2.5	1.83333
9	Female	Grade 4	9	Yes	2.33	1.82	2.5	1.91	2.64	1.75	1.58	4.25	3.8	3.26316	1.08333	2.2		1.33333	1.33333
10	Female	Grade 4	10	Yes	3.25	2.45	2	2.82	3.91	2.5	3.08	3.88	4	3.10526	1.25	1.3	3.2	1	1.33333
11	Female	Grade 4	9	Yes	2.08	3.09	3.33	3.91	2.64	2.83	2.5	3.75	3.1	3.26316	1.08333	2	2.2	1.66667	2.83333
12	Male	Grade 4	9	Yes	3.25	3.55	2.83	3	2.36	2.25	2.58	4.13	3.9	3	1.33333	2.5	2.6	1.66667	2.5
13	Male	Grade 4	10	Yes	2.67	3.27	3.92	2.82	4.18	3	2.92	3.88	4.7	2.42105	1.41667	1.4	1.4	1.5	2.5
14	Male	Grade 4	9	Yes	1.92	2.36	3.42	2.18	2.27	1.92	1.58	4	4.4	2.68421	2	2.6		1.5	2.5
15	Male	Grade 5	11	Yes	2.67	3	2.58	2.45	1.64	2.17	1.83	3.88	2.5	3.15789	3	2.9		3.33333
16	Male	Grade 5	10	Yes	2	2.82	3.92	2.91	1.91	2.25	2.08	4.38	3.3	2.57895	1.58333	2.1		1.5
17	Male	Grade 5	10	Yes	2.5	3.09	2.83	1.64	2.73	2.08	1.33	4.38	4.5	3.21053	1.16667	1.9		1	1.83333
18	Female	Grade 4	10	Yes	1.5	2.45	3.33	2.91	2.27	2.83	1.58	3.63	3	3.10526	1.58333		1.8	1	3.5
19	Male	Grade 4	10	Yes	2.92	2.55	2.17	2.36	2.91	2.17	2.58	3.63	3.5	3.57895	1.33333	2.9	1.6	1.5	3.5
20	Male	Grade 4	9	Yes										3.21053	1.58333	1.9		1	1.83333
21	Female	Grade 4	10	Yes											1	1.4	1.2	1	2.33333
22	Male	Grade 5	11	Yes														1.5
23	Male	Grade 5	10	Yes	4.25	3.36	3.08	2.27	3.55	2.83	3.5	4.88	4.4	2	3.16667	1.7	2	1.83333	1.33333
24	Female	Grade 5	11	Yes	1.75	3.45	3.92	2.36	1.55	2.92	2.67	3.75	2.9	1.21053	1.16667	1.3	1	1.83333	1
25	Male	Grade 4	9	Yes	3.17	3.36	2.17	2.55	3.82	3.08	2.33	4	3.7	3.47368	1.33333	2	1.8	2	2.5
26	Male	Grade 4	9	Yes											3.16667	2.4	2.2	3	2.83333
27	Male	Grade 4	9	Yes	2.5	2.73	2.42	2.09	2.64	2.33	2	4.75	4.9	3.26316	1	1.5		1.16667	2.66667
28	Male	Grade 4	8	Yes	4.75	3.73	3.5	3	3	3.17	3.25	4.5	3.4	1.94737	3.58333	3.1		2.5	4
29	Male	Grade 4	9	Yes	2.5	2.27	3.33	1.64	3.55	2.08	2.5	4.63	3.9	3.26316	1.16667	1.8		1.16667	1.5
30	Male	Grade 4	10	Yes	3.92	3.36	3	2.73	3.55	3.42	3.25	4.38	3.6	3.36842	1.08333	1.3	2.6	1.5	2
31	Male	Grade 4	9	Yes	2.67	2.82	3.33	1.82	2.45	1.75	2.08	3.75	3.9	3.36842	2	3.1	1.6	2.5	3.5
32	Male	Grade 4	9	Yes	2.17	3.18	3.25	2.09	2.55	2.83	2.25	3.63	3.4	2.68421	2.08333		2.4	1.66667	2
33	Male	Grade 4	8	Yes	2.83	3.27	4.33	2.64	3.45	3.33	4.42	3	2.3	1.42105	1.91667	1.5	1.2	1.83333	2
34	Male	Grade 4	9	Yes	4.17	4	3.08	3.55	4.09	3.33	3.33	4.13	3.6	2.57895	1.75			2.16667	2
35	Female	Grade 4	9	Yes	1.83	2.73	3.92	3	2.18	2.58	2.25	4.5	4.7	3.73684	1.5	2.9	2	1.33333	2.33333
36	Male	Grade 4	9	Yes	3.58	3.27	3.75	2.64	4.27	3.5	3.5	4	2.7	2.15789	3.08333	2.6	2.6	1.83333	2.5
37	Male	Grade 4	9	Yes	3.25	3.73	3.67	3.55	3.18	2.83	2.75	3.63	3.4		1.5	2.3	2		2.5
38	Male	Grade 4	9	Yes	3.5	3.45	3.17	3.73	3.36	3.42	3.92	3.25	2.9		2.08333	2.7		2	3.16667
39	Male	Grade 4	9	Yes	3.42	2.82	1.83	2.55	2	3.08	2.92	4.13	2.3	2.63158		2.2	2	2.33333	2.33333
40	Female	Grade 4	9	Yes	4.25	3.18	3.17	3.27	3.64	3.33	4.17	4.13	3.6	2.52632	1.58333	2.7	2.2		1.66667
41	Female	Grade 4	9	Yes	2	3.09	2.92	1.82	4.64	1.92	2.17	3.75	3.9		2.5	3.2		1.83333	2.33333
42	Female	Grade 4	9	Yes	2.67	3.18	3.25	2.55	4	2.25	2.92	3.63	3.1	2.68421	2.41667	2.4	2.2	2.16667	3
43	Female	Grade 4	9	Yes	2.83	2.82	4.17	3	4.27	3.67	2.42	3.75	4.5	3.15789	1.16667	2.4		1.83333	2.16667
44	Male	Grade 4	9	Yes	3.5	4.45	2.5	3.82	3.36	3.83	4.42	4.5	4.3	2.15789	2.5	2.4		2.16667	1.66667
45	Male	Grade 4	9	Yes	3.5	3.27	3.17	3.55	3.64	3.67	3.25	4.38	3.5		3	2.5	1.4	2.83333
46	Male	Grade 4	10	Yes	2.08	3	3.33	3.09	2.45	3.17	2.58	4.5	3.8	3.31579	1.33333	2.7	2.8	1.33333	2.33333
47	Male	Grade 5	9	Yes	3.83	4	3.08	3.18	4.36	3.08	3.25	4	3.7	2.47368	1.91667	2	2.6	1.83333	2.83333
48	Male	Grade 5	10	Yes	3.67	2.73	3.5	4.09	2.91	4.33	4.17	3.88	3	2.36842	2.41667	2.6	2.4	2.66667	3
49	Male	Grade 4	9	Yes	2.83	2.91	3.5	3.64	2.45	3.17	3.5	3	2.4	2.52632	1.66667	1.8	1.8	1.83333	2.33333
50	Male	Grade 4	9	Yes	3.5	4	3.17	2.73	3	2.92	3.42	3.63	2.7	3.63158	1.33333	2.3	2.6	1.33333	2.33333
51	Male	Grade 4	8	Yes	4.75	3.82	3.17	4.18	4.09	3.92	4.58	4.75	3.3	2.47368	2.5		2	2.33333	2.33333
52	Male	Grade 4	9	Yes	3.5	3.82	3.92	3.73	2.91	4	3.75	3.38	3.7	3.05263			2.2	1.5	3
53	Male	Grade 4	9	Yes	3.08	2.82	3.08	2.91	4	2.67	2.33	4.13	4.3	2.73684	1.58333	1.9		2.33333	2
54	Female	Grade 4	9	Yes	2.92	3.55	4	4.18	2.82	3.25	3.17	3.63	2.8	3	1.91667	2.1	1	1.66667	2.66667
55	Male	Grade 4	9	Yes										3.10526	1.83333	2.3		1.5	3.16667
56	Female	Grade 4	9	Yes	3.25	2.91	2	2.18	4.73	1.5	1.67	4.38	3.8	2.36842			2	1.83333	2.5
57	Female	Grade 4	9	Yes	4.25	3.55	1.75	2.36	4	2.92	3.25	3.13	4.1	2.26316	1.83333			1.5	1.83333
58	Male	Grade 5	10	Yes	3.25	3.09	3.58	3.82	3.82	3.67	3.33	3.38	3.3	2.73684	1.25	1.7	1.8	1.5	2.16667
59	Male	Grade 5	9	Yes										2.10526	1.33333	1.9	1.6	1.16667	2.16667
60	Male	Grade 5	10	Yes	2.08	2.73	2.42	2	2.55	2	2.58	4.38	3	2.47368	3	2.3		3.16667	3
61	Male	Grade 5	10	Yes	4.5	3.09	3.25	3.09	3	3.42	3.5	3.25	1.6	2.26316	3	2.6	3.2	3.5	2.66667
62	Male	Grade 5	10	Yes	3.75	3.45	4.58	3.45	4.55	3.08	4.33	3.5	4.5	2.47368	2.83333	2.1	2.6	3	4
63	Male	Grade 5	11	Yes	3.17	2.36	2.92	2.82	2.82	2.42	3.67	4.63	3.5	1.84211	2.5	2.1	1.8	2	2.16667
64	Male	Grade 5	10	Yes	3.17	3.18	2.25	2.27	2.64	4.08	2.75	3.75	4	1.63158	2.25	2.1		2.83333	3
65	Male	Grade 5	11	Yes	2.08	2.18	3.17	2.09	1.36	2.08	1.67	4.88	3.5	3.31579	1.33333	2.1	2	1.16667	1.66667
66	Male	Grade 5	10	Yes	3.25	3.27	3.83	2.36	3.09	2.67	3.42	3.5	3.8	2	2.33333	1.6	1.8	2.5	2
67	Male	Grade 5	12	Yes	2.75	3.64	3.33	4.36	1.91	4	3	3	1.7	3.15789			2.4	1.16667	2.66667
68	Female	Grade 5	11	Yes	3.17	3.27	3.33	3	2.64	3.5	3.42	3.63	3.1
69	Female	Grade 4	10	Yes	2.83	2.91	2.75	2.82	2.91	2.33	2.33	3.75	3.4	2.94737	2.33333	3	3.4	2	3.16667
70	Female	Grade 4	9	Yes	3.08	3.36	3.67	3.91	4	2.83	2.5	4.88	2.6	2.57895	1.58333	2.3	2.4	1.33333	2.5
71	Male	Grade 5	10	Yes	2.33	3.45	3.83	3.55	3.27	3	2.58	3.5	3	3	1.75	2.4		2	2.66667
72	Male	Grade 4	9	Yes	2.92	3.36	3.58	3.09	3.36	3.08	3.58	4.25	2.8	3.10526	1.41667			1.16667	2.5
73	Male	Grade 4	9	Yes	4.42	3.91	3.33	3.73	3.91	3	3.67	4.5	4.5	3.63158	1.16667	2.6		1.33333	2.33333
74	Male	Grade 4	9	Yes	4.42	3.45	3	3.55	3	3.67	3.5	3.63	3.8				1.8	2	1.66667
75	Male	Grade 4	9	Yes	3.33	3.18	3.42	3.64	4	3.42	3.08	4	4.4					2	3
76	Male	Grade 4	10	Yes	3.5	3.18	3.67	3.45	2.73	3.75	3.58	3	2.5	2.52632		2.5	1.6	2.66667	2.16667
77	Female	Grade 4	9	Yes	2.58	2.55	4	2.55	2.64	2.67	2.75	2.88	3.5	2.10526				1.83333	2.33333
78	Female	Grade 4	9	Yes	2.33	3.09	3.17	2.64	3.73	2.83	3.25	4.38	3.9	3	1.91667	2.6	2.8	1.33333	2
79	Male	Grade 5	10	Yes	2	3.18	4.58	3.18	1.36	3	1.25	3.75	4.1	2.84211	1.25	2	1.4	1.16667	2
80	Male	Grade 5	10	Yes	4	3.09	2.25	2.45	4.82	3.42	2.25	5.38	3.9	2.68421	2.75	2.6
81	Male	Grade 5	9	Yes											3.08333	3.6		2.33333	3.66667
82	Male	Grade 5	11	Yes	3.58	3.82	2.83	3.45	3.09	3.75	3.25	2.75	3.5	1.89474	1.91667	1.7	2.2	1.83333	2.16667
83	Male	Grade 5	10	Yes	3.42	3.36	3.25	3.73	3	3.33	3.83	3	2.6	1.78947	2.41667			2.16667	3.16667
84	Male	Grade 5	11	Yes	3.08	3.45	3.5	3	3.27	3.42	3.25	3.75	3.8					1.83333	1.66667
85	Male	Grade 5	10	Yes	2.25	2.73	2.25	1.82	3	3	1.42	3.5	3.8
86	Male	Grade 5	10	Yes	3.75	3	3.17	2.82	3.55	3.17	3	3.75	3.1	2.63158	1.75	2	2.2	2.66667	2.33333
87	Female	Grade 5	10	Yes	2.42	2.64	4.67	2.82	2.73	3.17	2.58	4.13	4.4				1.6	1.5	2.33333
88	Male	Grade 4	8	Yes	4.5	4.27	2.08	3.45	4.55	3.08	2.67	4.75	4.3	2.68421	2	2.3	4	1.33333	2.83333
89	Male	Grade 4	9	Yes	3.33	3.55	3.67	3	2.91	3.17	4.17	3.5	2.1	2.10526	2.41667	2.5	2.8	1.33333	2.16667
90	Male	Grade 4	9	Yes	3.25	3.55	3.75	3.18	3.73	2.92	3.83	3.63	3.9	1.84211	2.5	2.1	1.6	1.5	1.83333
91	Female	Grade 4	8	Yes	3.33	3.45	3.83	2.91	3.91	3.42	3.67	4.5	3	3.31579			3.4	2
92	Male	Grade 5	11	Yes	2.83	3.55	3.92	3.64	2.82	3.42	3	3.13	3.6	1.78947	2.16667	2.6		2	1.5
93	Male	Grade 4	9	Yes	2.08	2.27	2.67	2.09	1.73	2.08	2.42	3.88	2.9	2.84211		2.6		2.16667	3
94	Female	Grade 4	9	Yes	2.83	3.73	3.42	3.91	2.91	3.83	4.42	4.63	3.5	4	2.83333	3.7	4	3	3.5
95	Female	Grade 4	9	Yes	3.92	3.27	2.42	2.45	2.64	2.25	3	4.13	4.7	3.36842	2.41667	3		3.33333	2.5
96	Male	Grade 5	10	Yes	3.17	3	3.83	3.45	3.18	3.67	3.25	4.25	3.2	1.31579	1.41667	1.4	1	1.16667	2.16667
97	Female	Grade 4	9	Yes	3.08	3.27	2.75	2.82	2.73	2.67	2.67	3.75	3.7	3.47368	1			1.16667	1.66667
98	Female	Grade 4	9	Yes	3.58	3.45	3.75	3.18	4.18	4	3.58	4.63	4.2	2.05263	1.66667	1.4	2.4	1.33333	1.66667
99	Male	Grade 4	11	Yes	3.92	4.27	2.5	3.09	4.09	3.08	3.67	5.13	4.4	2.21053	2.08333	2.1	1	2.83333	2.66667
100	Female	Grade 4	10	Yes	2.92	3.73	3.25	3.55	3.36	2.67	3.83	3.38	2.9	2.36842	2.5	3	2.6	1.83333	3
101	Male	Grade 4	9	Yes	4.08	3.55	3.5	3.18	4.09	3.33	3.5	4.38	3.2	2.15789	1.41667	1.6		1.66667	1.66667
102	Male	Grade 4	10	Yes	4.33	3.36	3.5	2.27	3.64	2.33	3.08	4.63	4.2	2.94737	1.58333	1.8	1.6	1.66667	2.33333
103	Male	Grade 4	9	Yes	3.33	3.18	2.5	2.64	4.36	3	2.67	4.88	4.2	3.21053		2.5		1.33333	1.5
104	Male	Grade 4	10	Yes	3.17	3	3.08	2.91	4	2.92	2.83	4.38	4.2	2.05263	1.91667	2.5		1.83333	1.83333
105	Female	Grade 4	9	Yes	3.42	3.27	4.08	4	3.36	3.17	3.08	2.5	2.4	3.10526	1.83333	2.4	3.4	2.33333	2.16667
106	Male	Grade 4	9	Yes	3.42	3.45	3.17	2.27	3.64	2.42	3.75	4.25	3.8	3.10526	1.08333	2		1.16667	1.66667
107	Male	Grade 4	9	Yes	2.92	3.27	2.67	2.73	3.36	2.83	3.17	4.5	3.8	2.63158	1.58333		2	1	2.16667
108	Male	Grade 5	10	Yes	3.83	2.91	3.33	3.18	4.27	3.17	3.25	4.63	3.7	2.47368	1.08333	1.4		1.5
109	Male	Grade 5	10	Yes	2.58	2.64	2.83	1.18	2	2.17	1.58	3.38	2.7	3.36842	1.33333	2.5		1.5	3
110	Male	Grade 4	9	No	2.5	3.73	3.83	3.64	3.45	2.83	2.33	4.13	4.9	3.05263	1.58333	2.5		1.66667	3.33333
111	Male	Grade 4	10	No	2.42	2.64	3.42	3.18	2.45	2.75	1.67	4.63	3.7	2	1.33333	1.8		1.33333	1.5
112	Male	Grade 4	9	No	3.33	3.36	4.25	2.91	4.91	3.17	3.33	3.75	3.3	3.10526	1	2.2	3	1.16667	3.16667
113	Male	Grade 4	9	No	3.08	3.27	4.08	3.45	3.18	3.33	3.17	3.63	4.7	3.36842	1	2.9		1.5	3.16667
114	Male	Grade 4	9	No	4.42	3	3.08	3.09	3.73	3.08	3.67	5.13	3.5				2.6	2	2.33333
115	Male	Grade 4	9	No	1.55	2.36	2.5	1.36	3	1.83	1.83	3.63	3.9	3.10526		2		1.5	2.16667
116	Male	Grade 4	10	No	4	3.36	2.92	3	4.64	3.25	3.67	5.38	3.6
117	Male	Grade 4	9	No	3.33	3.73	4.25	3	2.18	3.33	3.58	5.25	2.4		1.16667	1.5		1.33333	1.5
118	Male	Grade 4	9	No	3.83	3.73	3.33	3.18	3.73	3.25	3.33	3.38	2.6		2.5	2.5	1.2	2.5	3
119	Male	Grade 4	10	No	4.33	3.27	2.58	2.82	4.36	2.67	3.25	3.38	4		1.41667	2.7	1.6	1.83333	3.16667
120	Male	Grade 4	10	No	2.58	2.27	3.58	3.09	2.55	3.67	2.75	2.25	2.9	2.68421		2.1	3.8	1.66667	3.5
121	Male	Grade 4	10	No	3.67	3.73	3.58	3.55	4.18	3.17	2.58	4.38	4.9	1.78947	2.5	1.9		2.16667	2.5
122	Male	Grade 4	8	No	2.67	3.36	4	4.45	4	3.08	3.5	3	3.5	3.63158	1.08333			1	2.33333
123	Male	Grade 4	11	No	2.33	3	3.83	2.91	2.27	3.08	2.75	3	2.9
124	Male	Grade 4	11	No	3.5	3.27	3.5	3.36	3.27	2.75	2.5	4	4.7	2.31579	2.33333	1.9	3.8	2.16667	2.33333
125	Male	Grade 4	9	No										2.94737	1.41667	1.7	2		1.83333
126	Male	Grade 4	9	No	3.25	3.64	3.42	2.55	3.64	3	3.58	3.75	4.2	3.52632	1.08333	1.8		1.5	2.16667
127	Male	Grade 4	10	No	3.75	3.91	3.58	3	3	3.25	4.25	2.88	2.9	2.63158	2.75	2.5	1	2.66667	2.66667
128	Male	Grade 4	9	No	2.83	3.45	4	3	2.82	4.17	2.75	2.75	3.9	2.94737		2.4	1.8	2.33333	2.66667
129	Male	Grade 4	9	No										3		1.3		1.16667	1.5
130	Female	Grade 4	10	No	2.58	2.27	2.42	1.82	2.91	1.83	2.25	4.5	3.8	3.63158	1.08333	2.4		1.16667	1.16667
131	Female	Grade 4	9	No	3.75	3.18	3.42	3.91	3.18	3.75	3.58	3.63	3.4		1.33333	1.6	1	1.16667	2
132	Female	Grade 4	10	No	1.92	2.45	3.25	2.73	2	2.25	1.83	3.5	3.1	2.31579	1.08333	1.3	1.6	1	2
133	Female	Grade 4	9	No	2.83	4.27	2	2.73	2.64	2.42	3.92	3.5	2.7	3.52632	1.41667	1.4	2.4	1.16667	1.5
134	Female	Grade 4	9	No	3	1.82	3.25	1.91	4.18	1.83	1.83	3.75	4.5
135	Female	Grade 4	10	No	2.67	2.73	4.17	2.64	2.82	2.67	3.25	4.25	4.4	2.42105	1.33333	2	1.8	1.66667	2.16667
136	Female	Grade 4	9	No	2.5	3.73	4.17	3.18	1.82	4.17	2.17	4.38	2.6	2.68421	1	1.7	3.4	1.5	2.5
137	Female	Grade 4	10	No	3.33	3.09	2.92	3.09	1.82	2.67	2.33	5	2.3	2.63158					2.33333
138	Female	Grade 4	9	No	2.67	2.36	3	3.09	3.82	2.25	2.08	3.25	2.4	2.94737	1.25	1.7	2	1.33333	2.33333
139	Female	Grade 4	9	No	3.33	3.09	4.25	4.18	3.82	3.33	2.75	2.88	3.8	2.05263	2.5	2.8	1.8	2.66667	3.5
140	Female	Grade 4	9	No	1.83	2.91	4.08	2.64	2.64	2.5	3.08	3.25	3.9	2.94737	1.08333	1.3		1	1.5
141	Female	Grade 4	10	No	2	2.18	2.75	1.91	2.09	2.25	1.83	3	3.3	2.68421	1.16667	1.7	2	1	1.83333
142	Female	Grade 4	9	No	3.58	3.27	2.58	3.27	1.91	2.25	1	2.38	3.5	3.36842	1.41667	1.9	1	1.5	3.33333
143	Female	Grade 4	9	No	3.5	3.36	2.5	2.73	3.36	2.92	2.75	5.13	5.1		1.91667	1.7	2	1.33333	1.66667
144	Female	Grade 4	9	No	2.17	2.82	2.83	2.82	3.73	3.5	2.58	3.63	4.6	3.21053	1.16667	2	1.8	1.33333	1.83333
145	Male	Grade 4	9	No	3	3.64	3	3.09	2.64	2.75	2.42	3.5	4.1	2	1.66667	2.1		1.33333	1.83333
146	Male	Grade 4	9	No	3	3.27	3.08	2.91	3.64	3	3.5	3.5	3.6		1.08333			1.5
147	Male	Grade 4	9	No	3.83	3.18	3.17	3.18	3.45	3.5	2.83	4.38	4.3	3.47368	1.41667	2.6	1	1.16667	3
148	Male	Grade 4	10	No	2.42	2.55	3.5	1.91	3.18	2.25	1.75	4.88	3.4	3.21053	1.75	2.6		2.5	3.16667
149	Male	Grade 4	9	No	3.5	3.18	3	3.18	3.55	2.5	2.58	4.5	4.1	2.89474	2.16667	2.4	1.4	2.16667	3
150	Male	Grade 4	9	No	2.92	2.73	2.92	2.64	4.36	2.75	2.67	4.38	4.6	2.05263	1.83333	1.6		1.33333	1.5
151	Male	Grade 4	10	No	3.42	3.45	4.33	2.91	3.36	3.83	2.58	4	4	2.89474	1.08333	1.7		1	2.5
152	Male	Grade 4	9	No	3.17	3.64	3.5	2.73	3.64	2.75	3.08	4.5	3.8	3.36842	1.16667	1.8	2.4	2	2.66667
153	Male	Grade 4	10	No	2.75	3.27	3.08	3.27	3.45	3.17	3.42	4.38	3.7		1.25		1.8	1	1.83333
154	Male	Grade 4	10	No	3.08	2.55	3.58	3.18	3.45	3.08	2.58	4.25	3.5	3.42105	1.16667	2.7		1.5	3.33333
155	Male	Grade 4	10	No	3.75	3.73	2.33	3.09	4.64	3	4.17	4.88	3.4	2.42105	1.41667	2.2	1.4	1.66667	2.83333
156	Male	Grade 4	9	No	2.67	3.27	3.83	3.18	2.36	2.5	2.5	4	3.3	2.52632	2.25		3.2	2.83333	2.5
157	Male	Grade 4	10	No	2.58	2.36	2.75	2.36	3.36	2.25	1.92	4.38	3.9	3.68421	1.16667	2		1	1.66667
158	Male	Grade 4	9	No	3	2.82	2.08	2.27	3	2.17	2.17	2.75	3.3	2.94737	1.75			2.16667	1.83333
159	Male	Grade 4	9	No	2.58	3.36	2.83	2.64	2.45	2.58	1.58	4.75	3.2
160	Male	Grade 4	10	No	2.33	3.45	3.33	2.36	2.64	1.92	2.33	3.88	4.9	3.47368	1.16667	2.4		1.16667	1.83333
161	Male	Grade 4	10	No	3.58	2.73	4.92	3.45	4.82	2.92	2.5	4.5	4.7	2	1.5	1.7	1.6	1.33333	1.5
162	Male	Grade 4	10	No	2	2.55	3.83	3.36	1.91	3.5	3.25	3.25	2.5	3.52632	1.08333	2.6	3.2	1.16667	3.33333
163	Male	Grade 4	10	No										3	1.66667	2	2.4	1.5	2.16667
164	Female	Grade 4	9	No	1.83	3.45	2.92	3.18	3.45	3.33	3	4.75	3.6	2.57895	1.33333	1.7		1.33333	2
165	Female	Grade 4	9	No	2.75	2.64	2	1.73	3.36	2.83	3.33	4.25	4.9	2.94737	1.25	1.4		1.66667	2
166	Female	Grade 4	9	No	3.75	3.18	3.42	3.55	5	2.75	2.17	2.75	4.7	3.42105	1.08333	1.7		1	1.83333
167	Female	Grade 4	9	No	1.83	3.09	2.5	3.27	2.09	2.5	2.5	2.75	3.1	3.42105	1.83333	2		1.33333	3.16667
168	Female	Grade 4	9	No	3.5	2.27	3	2.09	3.45	2.33	1.67	3.13	2.8	2.63158	1.5	1.8	1	1.66667	1.66667
169	Female	Grade 4	10	No	2.83	2.82	3.58	2.91	3.27	2.83	2.58	4.75	3.8	3.21053	1.33333	2.7		1.5	2.5
170	Female	Grade 4	9	No	1.83	2.82	4.5	3.55	3.64	3.58	2.92	2.88	3.4	3.26316	1.5	2.5	2.6	2	2.66667
171	Female	Grade 4	10	No	2.42	2.73	3.08	2.18	2.91	2.33	2.5	4	2.9	3.47368	1.33333	2.4		1.33333	2.33333
172	Female	Grade 4	9	No	2	3.27	3.5	3.73	2.09	3	2.75	2.63	2.2	2.26316	1.5	1.9	1.4	1.83333	2
173	Female	Grade 4	10	No	2.17	2	2.58	1.91	3.36	2.33	1.67	2.88	3.6	3.10526	2.25	2.2		1.33333	1.66667
174	Female	Grade 4	10	No	2.25	3.18	3.42	3.36	2.82	2.83	2.17	4.25	3.2	2.94737	1.5	2.2	3	1.5	2.66667
175	Female	Grade 4	9	No	3.5	2.55	4.17	3.09	3.36	2.75	4.08	4.63	3.5	2.52632	1.25	1.4		1.33333	2.66667
176	Female	Grade 4	10	No	3.5	4	3.67	3.18	4	3.58	4.17	3.63	4.1	2.31579	1.25	1.7			2
177	Female	Grade 4	9	No	2.75	3	4.42	3.18	4.45	3.25	2.92	4.75	4.6	2.52632	2.33333	2.2	2.6	2.5	2.33333
178	Female	Grade 4	9	No	3.58	3.64	3.58	3.45	3.36	3.08	3.25	3.63	3.1	2.21053	1.25	1.7		1	1.83333
179	Female	Grade 4	9	No	2.42	3.82	4.83	4.09	1.73	4.17	3.33	3	2.5	2.89474	1.16667			1.5
180	Female	Grade 4	10	No	2.17	2.91	5.08	2	1.91	2.58	1.67	4.38	5.4	2.42105	1.58333	2.1	2	1.16667	2.16667
181	Female	Grade 4	9	No	2.5	2.73	3.17	2.45	2.82	3.5	2.5	3.88	3.7	2.42105	1.16667	1.5		1	1.83333
182	Female	Grade 4	10	No	1.5	2.45	3.75	2.45	2.64	2.33	1.42	2.5	3.1	3.36842	1.08333	2		2	1.83333
183	Female	Grade 4	9	No	2.67	2.82	4.75	3.73	4.18	4.17	3.83	4.63	3.1	3.21053	2.33333	2.9		2.33333	2.16667
184	Female	Grade 4	9	No	3.33	3.64	3.5	3.36	3.73	3.17	2.58	4.25	3.6	2.15789	2.08333	2	2.6	2.83333
185	Female	Grade 4	9	No	2.92	3.18	3.5	3	3.64	2.58	3.17	3.75	3.7	2.15789		1.2	2.4	1.33333	1.5
186	Female	Grade 4	10	No	1.67	2.64	3.5	3.45	1.36	2.25	1.92	3.38	2.7	2.73684	2.5	2.7		2.33333	2.66667
187	Female	Grade 4	10	No	1.92	2.36	2.83	2.91	3	3	2.58	4.88	3.7	2.05263	3.08333			2	3
188	Female	Grade 4	9	No	3.58	3.55	3.25	3.18	4.09	3.17	3.08	4.63	3.8			1.7		2	2.16667
189	Female	Grade 4	10	No	5.58	3.55	3.5	3.27	4.64	2.5	2.67	6	5	3.42105	1.16667	2.4		1.66667	2.66667
190	Female	Grade 4	10	No	2.75	3	4.33	3.09	3.73	3.08	2.75	4.25	3.5		1.25			1.33333	2.33333
191	Male	Grade 4	10	No	4.17	3.82	4.83	4.27	5	4	4	5.63	3.7	2.63158	2.41667	2.2		2.5
192	Male	Grade 4	9	No	1.75	2.45	2.75	2.36	2.36	2.08	2	1.75	4.3	3.21053	1.08333	1.8		1	1.83333
193	Male	Grade 4	9	No	3.75	3.09	2.92	3.55	3.73	3.33	3.5	3.63	3.5		1.5	3		2.5	3
194	Male	Grade 4	9	No	4.58	3.73	4.33	4.09	3.82	3.42	3.92	3.5	3.6	1.78947	1.83333		1.8	1.66667
195	Male	Grade 4	10	No	3.08	3.64	2.67	3	2.82	2.67	3.17	4.13	3.9					1.83333	2.5
196	Male	Grade 4	10	No	2.58	2.36	3.17	3	2.55	1.92	2.5	3.75	3.5		1	1.3		1	1.33333
197	Male	Grade 4	9	No	3.75	2.55	4.33	2.91	3.36	2.5	1.42	4.75	2.9	2.73684	2.16667	2.5	2.4	1.33333	2.66667
198	Male	Grade 4	10	No	4.67	4.18	2.67	3.18	4.36	3.83	4.17	4.75	3.8
199	Male	Grade 4	10	No	2.42	3	3.08	3.91	2.64	3.17	2.67	4.13	2.1		1.41667	2		2	2.33333
200	Male	Grade 4	10	No	3.42	3.09	4.67	2.36	2.64	3.58	3.42	3.88	4.4	2.42105	1.91667	2.1	2	2.16667	2.5
201	Male	Grade 4	9	No	2.42	3.36	3.33	2.91	2.09	2.92	3	3.5	2	2.47368	1.16667	1.5	2	1	1.83333
202	Male	Grade 4	10	No	3.08	3.82	3.08	4.18	3.18	3.75	3.5	3.38	3.7				2.6	2.16667	3.16667
203	Male	Grade 4	10	No	3.92	3.27	3.92	4.36	2.82	3.33	3.08	5.13	2.6		1.25	2.1		1.16667	2.5
204	Male	Grade 4	9	No	2.33	2.73	3.17	2.36	1.91	2.42	1.92	3.75	3.9	3.57895	1			2	1.83333
205	Male	Grade 4	10	No	4	3.82	1.42	3.55	2.91	3.83	3.17	5	1.8	3	1.25	1.9	3	1	2.16667
206	Male	Grade 4	10	No	3.75	3	3.08	2.55	4.55	2.67	3	4.13	4.2		1.08333	1.5		1.16667	1.5
207	Male	Grade 4	10	No	3.75	4.09	3.17	3.36	3.45	3.17	3.42	3.25	3.5		3.16667	1.7	1.4	3.16667
208	Male	Grade 4	9	No											1.33333	3		1	3.33333
209	Male	Grade 4	11	No										3.26316	1.58333	2.8		1.33333	1.66667
210	Male	Grade 4	9	No										2.31579	1.58333	2		1.83333	2.66667
211	Female	Grade 4	10	No	2.75	3.18	3.42	2.91	2.45	2.75	2.92	4	2.7	3	1.08333	1.7	1.2	1	1.5
212	Female	Grade 4	9	No	3.17	3.09	3.67	3.27	3.64	3.17	2.83	4.13	3.8		1.08333	1.7	2.2	1
213	Female	Grade 4	10	No	2.83	2.36	2.58	2.36	2.82	1.83	2.83	4.38	4.7	3.05263	1.25	1.5	2.6	1.33333	2
214	Female	Grade 4	9	No	2.92	3.18	3.25	3.18	4	2.92	3	4.5	3.9	1.78947	1.25	1.6		1.5	1.66667
215	Female	Grade 4	9	No	2.5	2.91	4.83	2.73	3.27	2.33	3	3.25	4.1		1.08333	2.4		1.5	2
216	Female	Grade 4	9	No	2.75	2.27	3	2.55	1.64	2.58	2.33	3.38	3	2.52632	1.5	1.9	2	1.83333	2.33333
217	Female	Grade 4	10	No	3.58	3.09	3.17	2.45	3.64	3.5	2.5	3.75	3.6	2.73684	1.08333	1.6		1.5	1.5
218	Female	Grade 4	9	No	2.67	3.91	2.25	3	4.09	3.83	3.58	3.75	1.7	1.36842	1			1.16667
219	Female	Grade 4	10	No										3.36842	1	1.7		1	1.5
220	Female	Grade 4	10	No	3.42	3.36	3.92	3.55	2.64	3.33	3.25	3	3.4	2.36842		1	2	1.66667	1.5
221	Female	Grade 4	9	No	3.58	3.18	3.75	4.45	3.45	4.67	3.17	2.63	3	2.31579		1.7	2.4	1.66667	2.5
222	Female	Grade 4	9	No	3.5	2.82	3.58	3.82	4.55	3.5	3.42	2.88	3.3		1.25	2.1		1.16667	2.33333
223	Female	Grade 4	10	No	2.33	2.91	2.92	2.18	2.64	1.75	2.58	4.13	3.7		1.08333	1.8		1	1.83333
224	Female	Grade 4	9	No	3.08	3.36	4.33	3.45	2.64	3.08	2.67	4.13	3.5	3.05263	1.16667	1.5	2.4	1.16667	1.83333
225	Female	Grade 4	10	No	2.42	3.27	2.75	2.36	2.09	2.42	2.75	3.38	2.7	3.21053	1.16667	2		1.33333	3
226	Female	Grade 4	10	No	2.25	3.27	3.92	3.55	3.27	3.42	3.17	4.88	3.8			1.8	2.6	1	3.33333
227	Female	Grade 4	10	No	3.92	3.64	4	3	2.36	3.83	3.17	4.25	3.4	2.21053	1	1.4	1	1.16667	1.16667
228	Female	Grade 4	10	No	2	2.82	2.92	2.64	3	2.83	2.08	3.38	2.7	2.21053	2	2.6		1.33333	2
229	Female	Grade 4	9	No											1.33333				2
230	Female	Grade 4	9	No										2.68421	1.16667	1.3		1.16667	1.5
231	Female	Grade 4	9	No
232	Male	Grade 4	10	No	4.42	4.27	3.75	3.73	3.82	3.75	4.67	3.75	3.2		1.41667	1.3	2.6	1.16667	2.33333
233	Male	Grade 4	11	No	3	3.91	3.17	3.09	3.45	3.42	3.67	3.75	3.6
234	Male	Grade 4	9	No	2.33	3.18	3	3.18	1.73	3.33	2.25	4.13	2.1	2.57895	1.08333	1.4	1.6	1	2
235	Male	Grade 4	10	No	1.92	2.36	3.58	3.91	3.45	2.75	3.42	4	2.5	3.63158	1.08333	2.7	2.8	1.83333	3
236	Male	Grade 4	9	No										2.63158	1.83333	3.4	2.2	2	2.5
237	Male	Grade 4	9	No	3.08	2.36	4	2.73	1.73	3.5	2.83	3.13	1.7	2.94737	1.5	2.2	1.6	1.16667	2
238	Male	Grade 4	10	No	2.25	2.45	3.5	3.73	1.45	3.42	2.5	4.13	1	1.94737	1.75	1.6	1.4	1.33333	1.5
239	Male	Grade 4	10	No	2	2.64	3.5	2.27	2.73	2.42	1.92	3.88	4.6	3.26316	1.58333	2.3	2	1.83333	2.33333
240	Male	Grade 4	9	No	2.75	2.45	3.08	2.27	2.36	2.67	2.83	3.63	3.5	3.05263	1.16667	2.3	2.2	1.16667	2.5
241	Male	Grade 4	9	No	2.42	2.45	3.75	2.55	3.18	2.58	2.08	4.75	3.3	2.68421	2	2.2	1.2	1.33333	2.66667
242	Male	Grade 4	9	No	3.83	3.91	3.33	2.64	3.91	2.83	3.08	3.75	3.9	3.63158	1.41667	1.7	1.8	1.5	1.83333
243	Male	Grade 4	10	No	3.33	3.73	3.42	3.27	3	3.58	3.17	3.25	3.1	3.84211	3.33333		3.2	4	3.16667
244	Male	Grade 4	9	No	2.67	2	4.17	2.82	2.82	2.42	2.33	4	2.9	2.89474	1.16667	2.1	1.8		1.83333
245	Female	Grade 4	9	No	3.25	3.36	3.5	4	2.27	3	3	3.13	1.8	2.26316	1.08333	1.3	2
246	Female	Grade 4	9	No	3.17	3.09	3.17	4.27	2.36	3.67	3.42	1.88	1.2	2.26316	1.08333	1.3	1.8	1	1.5
247	Female	Grade 4	9	No
248	Female	Grade 4	10	No	1.75	2.73	3.75	2.27	2.45	2.08	2.67	4.88	4.5	2.89474	1.75	2.4		1.16667	2.83333
249	Female	Grade 4	10	No	2.33	2.55	3.25	3.55	2.91	2.25	2.67	4.13	3.1
250	Female	Grade 4	10	No	2.08	1.91	4.33	3.18	3	2.25	1.83	4.63	2.8	2.84211	1.08333	1.7	1.2	1.16667	1.66667
251	Female	Grade 4	10	No	3.67	3.64	2.92	3.45	4.09	3.33	3.58	4	4.5		1.5	2.6	2.8		3.16667
252	Female	Grade 4	9	No	3.83	3.64	3.58	3.64	3.82	3.33	3	4.13	4.6	3.36842	1.33333	2.6	2		2.83333
253	Female	Grade 4	9	No	3.08	3.55	3.17	4.18	3.36	2.58	2.92	4	3.3	1.94737			1.8	1.16667
254	Female	Grade 4	10	No	1.83	2.27	2.75	3.73	1.73	3.08	2.5	2.88	1.3	2.05263	1.08333	1.3	1.4	1.33333	1.33333
255	Female	Grade 4	9	No	1.17	3	3.5	1.45	1.18	3.08	1.75	2.88	3.9	2.73684	1.83333	2.4	1.4	2	2.83333
256	Male	Grade 5	10	No	2.83	3	2.5	3	3.82	2.67	3.17	4.13	4.2	3	1.33333	2.1	1	1	2.33333
257	Male	Grade 5	10	No	2.42	2.82	3.33	2.82	3.91	3.17	2.5	4	3.9	2.63158	1.25	1.4	1.8	1.16667	2.66667
258	Male	Grade 5	11	No	2.33	2.55	3.33	2.64	1.64	2.75	2.58	3.25	2.6	2.36842	1	1.6	1.6	1	1.66667
259	Male	Grade 5	10	No	2.83	3.55	3.17	2.73	3.09	3.58	3.92	3.13	3.1	1.47368	1.66667	1.7		1.5	1.33333
260	Male	Grade 5	10	No	2.83	3.45	2.92	2.64	3.18	2.25	2.5	4.13	3.7	3.26316	1.08333	2	3	1	1.5
261	Male	Grade 5	11	No	3.67	3.82	3.25	2.91	3.55	3.75	4.25	4.75	3.9	2.73684	2.58333			1.33333	3.33333
262	Male	Grade 5	10	No	2.83	3.18	2.83	3.55	2.64	2.83	3.42	4	3
263	Male	Grade 5	9	No	3.25	3.55	3.17	3.27	3.64	3.67	3.58	3.75	3	3.57895	1	1.9	2.8	1	2.5
264	Male	Grade 5	11	No	4.33	4.09	3.58	4	3.82	3.75	2.67	4.63	3	2.94737	1.16667	2.2	3	1.66667	2
265	Male	Grade 5	9	No	4.67	4	2.83	4.09	3	3.25	4.08	3.5	3.1
266	Male	Grade 5	11	No	3	3.45	3	3.45	3.55	3.5	3.25	4.63	4		1.58333	2.4		1.66667	2
267	Male	Grade 5	10	No										2.52632	1.5	2.4		1.5	2.33333
268	Male	Grade 5	12	No														2.5	2.83333
269	Male	Grade 5	10	No										2.47368	2.16667	1.9	2	1.5	1.33333
270	Female	Grade 5	10	No	3.67	3.64	3.5	3.18	3.55	2.75	3.08	2.88	3.4	2.68421	1.08333		1	1	1
271	Female	Grade 5	11	No	1.67	1.91	3.33	1.09	1.55	2.08	1.25	4.5	2.9	3.10526	1	1.8	1	1	1.16667
272	Female	Grade 5	10	No	2.58	2.91	3.67	2.91	2.45	2.25	2.25	3.13	2.6	2.89474	1.66667	2.1	1.8	2.16667	2.16667
273	Female	Grade 5	10	No	1.92	2.73	2.5	2.82	2.27	2	1.75	3.38	2.9	2.42105	1.08333	1.5		1	1.16667
274	Female	Grade 5	10	No	3.25	2.64	2.33	2.36	3.73	2.58	2.67	4.5	4.5	3	1.25	1.8		1.83333	2
275	Female	Grade 5	10	No	3.25	3.09	2.75	2.45	3.73	3.17	2.5	4.5	3.5	2.73684	1.08333	1.3	1	1.16667	2.16667
276	Female	Grade 5	9	No	2.42	2.36	3.08	2.82	2.73	2.92	2.92	4	3.5	3.05263	1.25	2.1		1	2
277	Female	Grade 5	10	No	3.08	3.18	3.83	2.55	3.27	3.33	2.25	3.75	4.3	3.36842	1.08333	2.2	1.4	1.66667	2.83333
278	Female	Grade 5	10	No	2.75	4	3.75	3.18	2.82	3.33	2.67	3.5	3.4	2.94737	1.41667	2.2	2.2	1.83333	1.66667
279	Female	Grade 5	10	No	3.75	4.09	3.42	3.09	3.64	3.5	3.08	3.25	2.7	1.68421	1.33333	1.4	1.2	1.16667	1.33333
280	Female	Grade 5	11	No	2.08	2.27	1.92	2.09	2.73	2.5	2	4.75	4	2.78947	1	1.6		1	1.83333
281	Female	Grade 5	12	No	2.33	2.45	2.42	2.82	1.73	2.33	2.25	3.63	3.1	3.47368	1.16667	2.1		1.16667	2.16667
282	Female	Grade 5	10	No	3.92	3.91	3.67	3.55	3.82	3.42	4	4.5	4.2	3.52632	2.66667	2	3.6	3.16667	3.16667
283	Male	Grade 5	10	No	2.42	3.09	3	2.73	3.09	2.5	2.67	3.5	3.7	2.21053	1		2.4	1	1.33333
284	Male	Grade 5	10	No	4.25	4.36	5.25	5.27	4.82	5.33	5.75	4.88	1.7				1.6	1.66667
285	Male	Grade 5	11	No	3.33	3.64	3.83	3.45	4.09	3.75	3.5	4.38	4.4	3.31579	1.16667	1.8	3	1.16667	2
286	Male	Grade 5	11	No	3.25	3.73	3.67	3.73	3.36	3.67	3.67	3	2.5	2.36842		1.8	2.6	1	1.83333
287	Male	Grade 5	10	No	2.33	3	3.67	2.45	3	2.08	2.42	4.75	3.4	2.42105	1.33333	1.5	1.8	1.5	2.5
288	Male	Grade 5	10	No	1.92	2.64	4.08	3.09	4.73	2.67	2.42	4.5	3.9	2.68421	1.33333	1.3	3	1.5	2.16667
289	Male	Grade 5	11	No	3.17	3.27	2.75	3.36	3	2.08	2.83	4.38	3.4	2.78947	1.08333	1.7		1	1.66667
290	Male	Grade 5	10	No	2.67	3.36	2.33	2.45	2.27	2.67	2.42	3.63	3.7	2.78947	1	1.4		1	2.16667
291	Male	Grade 5	9	No	4.08	4.36	2.17	2.73	3.82	2.58	4.33	5.25	2.2	2.63158	1.41667	2.1	1.6	1.33333	1.83333
292	Male	Grade 5	10	No	2.83	3.91	2.67	2.36	1.64	2.5	3.17	3.13	1.9	3.15789	1.58333	2.3		1.16667	3.33333
293	Male	Grade 5	11	No										2.42105	1.16667	1.8	1.4	1.16667	1.83333
294	Male	Grade 5	9	No	3.17	3.36	3.33	3.45	2.18	3	3	4	3.4	2.26316	1.41667	2	1.2	2.16667
295	Male	Grade 5	10	No	2.58	2.91	3.42	2.36	1.73	2.33	1.83	4.5	3.5	1.63158	1.83333	1.3		1.66667	2.83333
296	Male	Grade 5	10	No	1.92	2.82	3.67	2.45	2.36	2.58	1.75	4.25	3.6	3.42105		2.1	1.6		2.66667
297	Male	Grade 5	12	No	2.58	4	3.08	2.18	3.27	3	3.33	4.75	4.6	2.57895	3.83333	2.5	2.2		3
298	Male	Grade 5	11	No	3.25	3.64	2.92	3.18	2.82	3.5	3.17	3.13	2.4	2.52632	1.25	2.1	3.2	1.5	3
299	Male	Grade 5	12	No	3.33	3.18	3.5	3.36	2.82	3.75	3	3.63	2.3	2.10526	1.75	2	1.8	1.5	2
300	Male	Grade 5	10	No	3.42	3.18	4.5	3.27	3.64	3.67	3.08	4.63	4.4		1.08333	1.6	2.2	1	1.66667
301	Male	Grade 5	10	No										2.78947	4	2.9		2.5	2.83333
302	Female	Grade 5	11	No	2.58	4.09	3.75	3	4.64	3.33	3	4	3.6	3.57895	1	2.3	1.8	1.16667	2.16667
303	Female	Grade 5	10	No	2.92	2.91	2.33	3.82	3.36	3.58	2.75	3.38	2.4	1.52632	1.08333	1.5	2	1.16667	1.5
304	Female	Grade 5	10	No	3.42	2.82	3.17	2.36	2.91	3.33	3.33	4.38	3.2	2.42105	1.75	2.1	3	3	2.33333
305	Female	Grade 5	10	No	1.58	2.64	1.75	2.55	2.09	3	1.67	3.63	3.9		1.08333	1.6	2.2	1.33333	2
306	Female	Grade 5	10	No	3	3.27	2.67	3.45	2.64	3	3.17	3.88	3	3.05263		2.7		2.5	3.33333
307	Female	Grade 5	11	No	3.08	3.09	3.58	2.18	4.18	3.58	2.58	3.88	4.1	3.10526	1.33333	2.4		1.66667
308	Female	Grade 5	12	No	1.58	2.18	3.75	2.36	1.73	2.83	1.83	3.88	5	2.31579	1.5		2.2	1.5	2.16667
309	Female	Grade 5	12	No	3.08	2.27	2.75	2.09	3.36	1.42	1.17	4	3.9	2.94737	1	1.4		1	1.33333
310	Female	Grade 5	10	No	3.17	2.09	4.75	2.36	3.64	2.58	2.42	3.75	3.4	3.42105	1.16667	1.6	1.8	1	1.33333
311	Female	Grade 5	11	No	1.67	2.82	4.08	3.27	3.18	3.92	2.17	3.38	2.5	2.26316	1.66667	1.8		1.66667	1.83333
312	Female	Grade 5	10	No	3.33	2.64	3.75	3.09	3.45	2.42	1.58	3.25	3.6	1.94737	1.16667	1.7	2	1.66667	1.83333
313	Female	Grade 5	10	No	2.67	2.82	4	2.82	2.82	2.75	2.17	3.88	2.7	2.15789	1.41667	1.7		1.33333	2
314	Male	Grade 5	10	No	3.17	2.82	4.08	3.09	3.55	3.83	3.33	4	2.8	2.42105	1.08333	1.7		1.5	2
315	Male	Grade 5	12	No	2.75	2.73	3.17	2.82	3.73	2.25	2	4.5	3.6	3.57895	1.5			1.5	3
316	Male	Grade 5	11	No	3.67	3.18	4.92	3.45	3.82	3.83	4.33	3.38	3.2	1.94737	2.5	1.7		1.66667	2
317	Male	Grade 5	11	No	2.75	2.64	3.5	2.82	2.18	2.25	1.83	4	3.9	2.36842	2.66667	2.5		2.33333	1.66667
318	Male	Grade 5	10	No	3	4	3.58	3.45	2.91	2.92	2.58	3.25	3.9	2.94737	1.16667	1.9		1.5	1.83333
319	Male	Grade 5	11	No	2.25	2.73	2.58	3.09	2.36	3.08	2.08	3.88	4.1		2.25			1.5
320	Male	Grade 5	10	No	2.08	3	3.58	2.18	2.18	2.42	2.17	3.75	3.2	2.89474	1.5	1.9		1.33333	2.16667
321	Male	Grade 5	11	No	2.58	3.18	4.92	3	3.82	3.08	2.67	3.13	4	3.10526	1.08333	1.9		1	1.83333
322	Male	Grade 5	11	No	4	3.82	3.75	3	3.36	2.58	3.92	4.13	3.9	2.47368	1.16667	1.6		1.5	2.33333
323	Male	Grade 5	11	No	3.75	4	3.08	3.36	3.45	3.08	3.42	3.38	3.7	2.52632	1.5	1.9	1.8	1.5	2
324	Male	Grade 5	11	No	3.67	3.45	3.92	2.73	3.27	3.33	2.67	4.75	3.1	2.31579	3.41667	1.9	1.2	1.83333	2.33333
325	Male	Grade 5	11	No	2.75	3.27	3.25	3.55	2.64	2.42	2.92	3	2.3		2.41667	2.1	1.8	3	3
326	Male	Grade 5	10	No	3.42	2.82	2.83	2.09	3.18	2.08	2.33	4.25	4		1.58333			1.5	2
327	Male	Grade 5	11	No	2.25	2.91	3.5	2.45	2.18	2.5	3	4	4.1	2.21053	2	1.7	2.6	1.66667	2.16667
328	Male	Grade 5	12	No	2.42	3.73	2.42	3.55	2.55	2.83	2.33	3.75	2.8	2.21053	2	1.9		1.5	3
329	Male	Grade 5	12	No	3.33	3.27	3.42	2.82	3	3.67	3.58	4.5	2.7	2.84211	3	2.8	2.4	2.66667	3.5
330	Male	Grade 5	10	No	3.92	1.82	2.92	2	2.82	2.25	3.25	4	3.1		1.16667	1.6		1	1.5
331	Male	Grade 5	11	No										3.36842	1	2		1	1.66667
332	Male	Grade 5	9	No										1.78947	1.5	1.5		1.66667	1.66667
333	Female	Grade 5	10	No	3.67	2.91	3.17	3.55	2.64	2.83	3	3.5	3.7	2.31579	1.5	2.3			2.16667
334	Female	Grade 5	11	No	2	2.45	2.83	2.64	1.36	2.58	2.25	4	1.7	1.36842	1.66667	1.1	1.2	1.5	1.5
335	Female	Grade 5	10	No	3.67	3.73	3.33	3.45	4.55	3.17	3.42	4.13	4.2	2.89474	2.75	2.8		2.33333	3.16667
336	Female	Grade 5	10	No	3.92	3.64	3.83	3.27	4.45	3.5	3.08	4	4.3	2.63158	2.66667	2.5		2	3.33333
337	Female	Grade 5	11	No	2.33	2.45	2.17	1.09	2.27	1.83	2.08	3.88	3	2.52632	1.08333	1.5		1	1.83333
338	Female	Grade 5	11	No	3.17	2.55	3.92	4	2.82	2.92	2.67	3.38	3.7	2.10526	1.08333		2.8	1	2
339	Female	Grade 5	10	No	2.67	3.09	3.33	2.73	3.45	2.75	3.25	3.5	3.5	1.94737	1.25	1.7	1.2	1.16667	2.16667
340	Female	Grade 5	12	No	2.92	2.82	3.83	2.82	3	3	3.17	3.38	4.3	3.47368		1.6		1.16667	1.66667
341	Female	Grade 5	11	No	1.17	2	2.92	1.09	2.73	1.75	1.25	4.25	3.7	3.15789	1.08333	2		1	1.66667
342	Female	Grade 5	11	No	3.25	3.45	3.58	3.82	2.91	3.67	3.33	3.13	3.4	2.94737	1.08333	2	2	1	2
343	Female	Grade 5	10	No	3.33	3.27	3.5	2.91	3.55	3.67	3.58	4.75	4.2	3.31579	1.25	2.5		1.5	1.83333
344	Female	Grade 5	10	No	2.42	2.36	2.42	2	2.36	1.83	2.08	4.25	4.2		1	1.8		1.5	1.33333
345	Female	Grade 5	11	No	2.08	2.73	1.83	3	2.73	2.83	3.08	4.75	3.8	2.63158	3.33333	2.4	2.6		2.83333
346	Female	Grade 5	11	No	4.17	3.18	3	3.45	4.73	2.92	3	4.75	4.4		1	1.4	2	1	1.5
347	Female	Grade 5	11	No	1.92	3.27	2.67	1.91	2.73	2.17	1.17	2.5	3.6		1.08333	1.7		1.33333	2
348	Female	Grade 5	11	No	2.08	3.09	4.08	2.82	3.09	2.83	2.67	4.63	4.5	2.31579			2.4	1.5	1.83333
349	Female	Grade 5	10	No	4.42	4.36	2.33	2.73	3.09	2.33	3.58	4.88	4.4	2.78947	1.33333	1.8		1.33333	2.33333
350	Female	Grade 5	11	No	2.67	2.82	3.67	3.09	2.82	2.75	2.25	4.88	3.8		1.25	1.7	3	1.16667	2.16667
351	Female	Grade 5	11	No	1.58	2.27	2.25	1.55	2.27	1.58	1.17	4.5	3.6	3.26316	1.16667	1.8	1.2	1	1.5
352	Female	Grade 5	11	No	3.25	3.45	3.08	3.64	2.64	4.17	2.58	3.75	3.6	2.52632	2.08333	2		1.83333	1.33333
353	Female	Grade 5	11	No	3.08	3.18	3.25	3.36	2.82	3.5	2	4.88	3.2	2.47368	2.33333	2.5	2.2	2.83333	3
354	Female	Grade 5	10	No											2.25	2.6		2.66667	2.16667
355	Female	Grade 5	10	No	2.83	2.91	3.5	2.64	3.09	2.67	2.42	3.75	3			2.1	2.6	1.83333	3
356	Female	Grade 5	11	No	2.75	2.36	2	2	3.18	1.83	2.08	4.38	4.7		3.75	2.7		2.33333	2
357	Female	Grade 5	10	No										3	2.25	1.8		1.5	2.83333
358	Female	Grade 5	10	No										2.57895	1.33333	1.7		1.33333	2.16667
359	Male	Grade 5	11	No	3.83	3	3.92	3	3.91	2.92	3.42	3.25	3.3		1.66667	2.1		2	2
360	Male	Grade 5	10	No	2.92	2.73	3.5	3.36	2.91	3.33	3.33	3.88	3	2.21053	2.16667	2.2	1.4	2.33333	2.66667
361	Male	Grade 5	10	No											2	3.2		2.33333	3.16667
362	Male	Grade 5	10	No	3.67	2.82	2.5	2.36	4.27	2.58	2.92	4.5	3.6	3.47368	1.58333	3.2		1.83333	2.66667
363	Male	Grade 5	10	No	2.5	2.64	2.08	2.27	2.18	2.25	2	4.13	2.9	2.89474	1.08333	1.6		1	1.5
364	Male	Grade 5	10	No	4.33	4.45	3.17	3.18	3.91	2.92	3.25	3.75	2.4		1	2.1			1.5
365	Male	Grade 5	10	No	2.08	2.27	2	1	2	1.25	1.5	3.88	1.9	2.47368	1	1.7	1.2	1.16667	2
366	Male	Grade 5	10	No	3.08	3.09	3.67	2	2.64	2.75	4.17	3.63	2.7		1.5	1.7		1.5	1.33333
367	Male	Grade 5	10	No	2.42	2.82	4.67	2.82	2.82	2.67	2.67	4	3.1	2.89474	1.5	1.9		1.5	1.83333
368	Male	Grade 5	11	No	3.17	3.64	2.58	3	2.73	2.75	3.25	4.13	3.9		1.41667	1.9	2		1.66667
369	Male	Grade 5	10	No	2.92	3	3.67	2.64	3.55	3.08	2.42	4.13	4.4	2.31579	1.16667	1.6		1.66667	1.83333
370	Male	Grade 5	10	No	3.83	3.55	1.75	2.82	3.45	3.17	3.08	4.88	3.4	3.36842		2.7		2	3.5
371	Male	Grade 5	11	No	2.25	3.09	3.42	2.82	2.73	3	2.75	3.25	2.3	2.57895	1.41667	2.3		1.5	2
372	Male	Grade 5	11	No	1.67	2.91	3.75	2.64	1.91	2.17	2.08	4.25	3.6	2.63158	1.66667	1.8	2.4	1.83333	2
373	Male	Grade 5	11	No										2.31579	1.58333	1.8	2	1.16667	2.5
374	Male	Grade 5	12	No										1.89474	1.08333	1.6	1.4	1.33333	1.5
375	Male	Grade 5	10	No											1.08333	1.6			1.5
376	Male	Grade 5	11	No										3.10526	1.75	1.7		2.33333	2.33333
377	Male	Grade 5	10	No										3.15789				2
378	Male	Grade 5	10	No										1.15789	3.75	2.1	1.2	2.16667	1
379	Male	Grade 5	11	No										2.57895	1.16667	2.1	2.2	1.5	2.16667
380	Female	Grade 5	11	No	3	3.18	2.83	3.36	3.18	3.83	3.17	3.75	2.2	2.21053	1.83333	1.4		1.66667	1.66667
381	Female	Grade 5	11	No	3	2.64	2.33	2	3.55	2.17	2.17	4.13	4.1	3.10526	1	1.7		1	1
382	Female	Grade 5	11	No	2.33	2.91	3.42	2.36	2.09	1.83	2.08	3.38	2.6	2.68421	1.08333	1.4	1.6	1.16667	1.16667
383	Female	Grade 5	11	No	3.58	3	2.83	2.64	3.27	3.08	3.25	3.75	4.5	1.52632	1.5	1.7	1.2	2.16667	1.83333
384	Female	Grade 5	10	No	3.33	2.18	3	2.45	2.91	2.92	2.58	4.75	3.6	2.57895	1.16667	2.1	1.2	1.16667	2.16667
385	Female	Grade 5	10	No	2.75	3	2.83	2.45	3.73	2.42	2.75	4.88	3.3	3.15789	1.75	3		1.33333	2.83333
386	Female	Grade 5	10	No	3.83	3.82	3.5	3.64	3.45	3.75	2.83	3	3.7	2.42105	1.25	2.1		1.5	2.5
387	Female	Grade 5	10	No	2.42	2.09	2.17	1.82	4.09	2.5	2.17	5.13	4.6	2.63158	1.41667	2	1.2	1.16667	1.5
388	Female	Grade 5	10	No	2.92	2.82	3.5	2.18	3.18	2.67	2.5	4.13	3.8	2.36842	1	1.7		1.16667	1.66667
389	Female	Grade 5	11	No	1.92	3.36	2.58	2.91	2.18	3.17	2.17	3	3.1	2.68421	1.33333	2		1.16667	2
390	Female	Grade 5	11	No	1.5	2.18	1.92	1.45	1.27	2	2.17	4.63	4.1	3.21053	1.41667	2.6	1	1	1.5
391	Female	Grade 5	11	No	3.25	3.09	3.33	3.18	3.09	2.75	2.67	4.13	3.2	3.42105	1.33333	2.1	1.6	1	1.83333
392	Female	Grade 5	10	No	1.67	1.36	2.83	1.91	1.09	1.33	1.08	3.63	2.8	1.63158	3.08333	2.6		3.33333	2.83333
393	Female	Grade 5	10	No	2.17	2.09	3.58	2.45	2.18	1.42	1.42	3.13	2.6	2.52632	1.08333	1.5		1	1.83333
394	Female	Grade 5	11	No	2.08	2.82	3.58	3	3.09	3	3.33	4.5	2.9	2.68421	1.75	2.3	2.4	1.5	2.33333
395	Female	Grade 5	11	No	2.17	2.09	2.42	2.73	2.64	2.83	1.92	4.38	3.2	2.89474	1.66667	2.3	2.2	1.33333	2
396	Female	Grade 5	10	No	1.83	2	4.5	2.73	2.64	3	2.08	4	4.8	3.26316	1.25	1.6		1.33333	1.5
397	Female	Grade 5	10	No										2.42105	1	1.5		1	1.33333
398	Female	Grade 5	10	No											1.16667	2	2.4	1.5	2
399	Female	Grade 5	10	No										3		2.9		3	3.33333
400	Female	Grade 5	10	No										2.68421	1.66667	2.3	1.6	1.66667	2.66667
401	Female	Grade 5	11	No
402	Female	Grade 5	10	No										3.73684	1.08333	1.7	1	1.16667	1.83333
403	Male	Grade 4	9	No	2.92	2.73	2.92	2.73	3.18	3.08	2.67	3.75	4	2.73684	1.33333	2.2	1.8	1.66667	2.83333
404	Male	Grade 4	10	No	2.25	2.36	4.08	2.82	3.36	2.42	2.08	3.88	4.6	3.47368	1.58333	2.3	2.2	1.83333	2.66667
405	Male	Grade 4	10	No	2.33	2.73	3.08	1.82	1.82	1.83	1.33	4.88	3.9	2.15789	1.91667	2.4	2	1.83333	3
406	Male	Grade 4	10	No	2.75	3.09	3.17	3.09	3	3.17	3.5	5.63	4.1	2.57895	1.33333	1.6		1.33333	1.83333
407	Male	Grade 4	9	No	3.92	3.64	3.33	3.27	4.09	3.42	3.33	4	3.7	1.73684	3.75	2.9		3.33333	3.33333
408	Male	Grade 4	9	No	3	3.45	2.67	3.27	2.73	2.83	2.17	3.38	2.7	2	2.5	2.1	2.2	2	2.16667
409	Male	Grade 4	10	No	1.92	2.36	3.08	3.09	2.64	2.08	1.5	3.25	3.6	3.31579	1.25	2.6	2.8	2	2.16667
410	Male	Grade 4	9	No	3.92	3.82	3.25	3	3.91	3.25	3.42	3.38	3.3	2.10526	2.08333	1.7		1.33333	1.66667
411	Male	Grade 4	10	No	1.75	2.55	2.17	2.45	2.27	2.33	2.58	4.25	3.2		1.41667	2.6	2.4	1.33333
412	Male	Grade 4	11	No	3.58	3.09	3.75	4	4.09	3.17	3.08	4.5	3.4	3.21053	1.75		3.4	1.5	2.33333
413	Male	Grade 4	10	No	3.58	2.64	3.42	3.27	3.55	2	2.08	4.13	3.6		1.33333			1.33333	1.33333
414	Male	Grade 4	10	No	2.83	2.36	2.58	2.27	4.18	1.92	1.67	5.13	3.7		2.66667	2.8	3.2	2	2.33333
415	Male	Grade 4	10	No	2.83	2.45	3.17	2.91	3.09	2.42	2.33	3.5	2.5	3.26316	1.25	2		1.16667	2.16667
416	Male	Grade 4	9	No	2.5	3.18	3	1.91	2.09	1.83	1.92	3.63	3.8
417	Male	Grade 4	11	No	3	3.73	4	3.18	3.64	3.58	2.58	4.13	3.2	3	1.25	2		1.5	2.33333
418	Male	Grade 4	10	No	2.92	2.73	3.42	2.36	3.36	3.17	3.17	4.5	4	2.89474	1.75	2.1	2.8	1.5	2.66667
419	Male	Grade 4	10	No	2.83	2.91	3.5	2.73	2.55	2.5	2.42	3.88	3.2	3.05263	1.66667	1.7		1.5	2.16667
420	Male	Grade 4	9	No	1.92	2	3.33	2.18	1.73	2.17	2	4.5	3.5	2.10526	2.91667	1.6		2.5	3
421	Male	Grade 4	10	No	3.08	2.82	2.58	2.36	3.64	2	1.67	4.25	3.4		1.25		2.6	2.33333	2.33333
422	Male	Grade 4	9	No	2.17	2.09	4	2.09	3.55	2.75	2.08	3.63	3.4	2.42105	1.75	2.1	2.4	1.33333	2.66667
423	Male	Grade 4	10	No	2	2.09	2.75	2.82	2.27	1.92	2.08	3.13	2.2	2.89474		2.2		1	2
424	Male	Grade 4	10	No	3.42	3.45	3.17	2.64	3.36	3.17	2.92	3.63	3.7	2.63158	2.33333	2.4	1.8	2.33333	1.83333
425	Male	Grade 4	10	No	1.83	2.09	2.92	1.55	2.27	1.83	1.92	4.25	3.6	3.47368	1	2		1	2
426	Male	Grade 4	9	No	3.5	3.36	3.67	2.82	3.64	2.83	2.67	4.5	3.2
427	Male	Grade 4	12	No	3.33	3.64	3.42	3.45	3.91	3.33	3.58	3.38	3.2	2.78947	1.83333	1.9	2.8	1.83333	3
428	Male	Grade 4	12	No	3.17	2.73	2.58	2.73	3	2.42	2.5	4.5	2.5	3.52632		2.3		1.83333	2.33333
429	Male	Grade 4	10	No	3.67	3.45	3.75	3.27	3	3.33	3.92	3.63	3	2.52632	1.33333	1.4	1.8	1.33333
430	Male	Grade 4	10	No	2.42	2.73	2.58	2.82	2.45	2.25	1.83	4	3.3	2.73684	1.75	1.8	2.6	1.33333	1.83333
431	Male	Grade 4	10	No	3.08	2.91	2.17	2.55	3.91	2.58	2.5	5	3.9	3.73684	2.08333	2.6		2.5	2.16667
432	Female	Grade 4	9	No	1.75	2.82	2.67	2	2.55	2.67	1.67	4.13	4.5	3.31579	1.25	2.2	1	1.16667	1.83333
433	Female	Grade 4	9	No	3.75	4.09	3.58	3.09	4.82	3.33	4.42	4.63	4.1	2.57895	1.16667	1.6		1	1.66667
434	Female	Grade 4	10	No	2.5	2.18	4.25	2	2.36	2.33	1.42	3.13	5.2	3.05263	1.5	2.3		1.83333	2.16667
435	Female	Grade 4	9	No	2.75	2.36	2.25	2.09	3.27	2.25	1.5	4.63	4.2		1			1	1.66667
436	Female	Grade 4	10	No	1.75	2.27	2.42	1.55	2.36	2	1.42	3.25	4.1	2.78947	1.41667	2.1		2	2.33333
437	Female	Grade 4	10	No	3.17	2.45	4.42	3.18	3.36	2.25	2.5	4.38	4.1	3	1.58333	2.1		1.5	1.83333
438	Female	Grade 4	9	No	2.67	2.45	3.08	3.18	2.64	2.75	3.08	3.75	3.1	2.84211	1.08333	1.7	2.2	1	1.66667
439	Female	Grade 4	9	No	2	3.09	4.33	2.27	3.55	3.08	2.17	4.13	4.6		1.08333	1.5	3	1	1.33333
440	Female	Grade 4	9	No	2	3.45	2.5	2.36	3.82	3.25	2.58	4.75	3.6	2.89474	1			1.16667	1.5
441	Female	Grade 4	10	No	2.58	3.27	2.83	2.64	2.82	2.92	3.08	4	4.2	3.52632	1.25	1.7	1.2	1.33333	1.5
442	Female	Grade 4	9	No	2.67	2.18	2.83	1.55	3.09	2.25	1.75	5.13	4.5	3.31579	1	1.6		1.16667	1.33333
443	Female	Grade 4	10	No	2.83	3.18	2.58	3.27	3.09	2.83	2.67	4.25	4.1		1.66667	2.6	1.2	1.66667	2.83333
444	Female	Grade 4	10	No	3.17	2.91	3.25	2.82	3.55	2.83	2.5	4.25	5	2.42105	1.08333	1.4		1	1.33333
445	Female	Grade 4	10	No	2.75	2.82	3.92	2.91	2.55	3.25	2.08	4.63	4.5	3.15789	1.08333	1.8	1.8	1	1.83333
446	Female	Grade 4	9	No	3.83	2.55	3.42	2.45	3	2.75	2.67	4.75	3.6	3.15789	1.16667		2.2	1	1.83333
447	Female	Grade 4	10	No	1.83	1.91	2.83	1.55	2.73	2.08	1.33	4.13	3.3	2.94737	1.16667	2.3		1.5	1.83333
448	Female	Grade 4	9	No	2.92	3.45	3.75	3.18	3.09	3	2.92	4.13	3.8	3.21053	1.25	2		1.5	2
449	Female	Grade 4	10	No	1.17	1.91	3.92	2.18	1.27	2.58	1.42	2.63	3.2	2.42105	1.08333	1.9	2.2	1.16667	1.33333
450	Female	Grade 4	9	No	2.58	3.18	2.58	2.64	3.73	2.25	2.42	3.13	3.5	2.47368	1.16667	1.5		1	1
451	Female	Grade 4	10	No	3.42	4	3.67	3.73	4.36	3.5	4.25	3.75	4		1.41667	1.6	1.8	1	2.5
452	Female	Grade 4	10	No	2.25	2.27	1.75	1.18	1.73	1.25	1.42	4.25	4.2	3.47368	1.33333	2.1		1.16667	1.16667
453	Female	Grade 4	9	No	2.42	2.09	3	3.18	4.45	1.83	1.17	3.38	4.4	2.84211	1.66667	2.3	2.4	1.83333	2.16667
454	Female	Grade 4	9	No	2.75	3.64	4.75	3.36	3.64	3.92	2.67	3.63	3.5	2.63158	1.25	2.2	2.8	1.33333	1.66667
455	Female	Grade 4	10	No	4	3.36	3.58	4	4.64	3.75	4.08	4.5	4.6	3.47368	1	2.5	2.6	1.33333	2.33333
456	Female	Grade 4	10	No	2.67	2.91	3.58	3.09	4.27	4	2.58	3.88	3.6	3.63158	1.58333	2.6	2.8	2	2.5
457	Female	Grade 4	10	No	3.25	3.27	3.42	2.91	2.91	2.92	3.58	4.63	3.4	1.78947	2.5	1.7		2.16667	2.5
458	Female	Grade 4	9	No	3.08	3.09	4.67	3.36	3.27	3.33	2.83	4.75	3.8	3.26316	1.91667	2.1		1.5	2.83333
459	Male	Grade 4	9	No	1.92	2.18	3.92	3.36	3.55	2.17	2.83	3.75	3.7	3.73684	1.16667	2.2	1.2	1	1.83333
460	Male	Grade 4	10	No	2.75	3	3.83	3.09	2.36	2.83	2.33	3.75	3.3	3.15789		2.3		1.5	3
461	Male	Grade 4	9	No	3.5	4.18	2.5	3.45	4.64	3.17	3.58	4.25	4.2	3.57895	1.41667	2.3		1.66667	2.83333
462	Male	Grade 4	9	No	3	2.64	3.42	2.55	3.73	2.5	2.67	4.38	4.5			2.8		2	2.83333
463	Male	Grade 4	10	No	3.67	3.55	3	3.18	3.45	3.75	3.17	3.25	3.7	3.52632	1		1.8	1	1.66667
464	Male	Grade 4	10	No	2.75	2.09	3.42	2.82	2.36	3.33	2.75	4.5	4.8	3.26316	1.41667	3		1.66667	3
465	Male	Grade 4	8	No	2	2.45	3.92	2.36	2.18	3.17	2.67	4.5	4.1	2.68421		1.7
466	Male	Grade 4	10	No	3.17	2.64	3.33	1.82	3.36	1.33	2.08	5.5	4.4	3.36842	1	1.6	1.6	1	1.66667
467	Male	Grade 4	9	No	3.33	4.27	3.5	3.45	3.09	3.33	2.92	3.75	3.6	2.52632	1	1.6	1.4	1.16667	1.66667
468	Male	Grade 4	9	No	2.33	3.45	4	2.73	4.27	3	3.5	5.13	4.5		1.58333
469	Male	Grade 4	10	No	3.67	3.45	2.5	2.73	3	2.83	2.58	5.13	4.2	3.26316	1.08333	1.8		1.16667	2.33333
470	Male	Grade 4	9	No	2.42	3.45	2.75	2.27	3	2.83	2.58	4.38	2.1		2.08333	2.4		1.5	2.66667
471	Male	Grade 4	10	No	2.92	2.82	4.08	3.45	2.82	3.42	3.25	2.88	3.2	3.36842	1.75	3.3	2.8	2
472	Male	Grade 4	10	No	1.75	1.91	3.67	1.82	2.55	2.08	2.33	4.38	4.4	3.05263		1.8		1.83333
473	Male	Grade 4	10	No	2.42	3.64	3.67	2.36	3.09	2.5	2.5	3.88	3.2		1.33333	2	3.2	1	3
474	Male	Grade 4	10	No	2.92	3.18	3.42	3	3	3	2.83	3.25	2.5	2.89474	2.08333	2.3		2.5	2.16667
475	Male	Grade 4	10	No	3.42	2.91	3.33	3.18	4	3.25	3.42	4.63	4.4	2.36842	1.5	1.8		1.66667	1.5
476	Male	Grade 4	10	No	4.58	3.45	2.33	2.45	3.82	3.08	3.33	4.63	3.2	3.73684	1.16667		3.2	1.33333	3.5
477	Male	Grade 4	10	No	3.83	3.27	2.33	2.91	3.64	2.83	3.08	4.13	3.7	1.84211	1.75		1.2	2.16667	1.83333
478	Male	Grade 4	10	No	3	3.55	3.42	2.91	3.45	2.67	3.08	4.38	3.6			3.1	2.2	2.16667	3
479	Male	Grade 4	10	No	3.75	3.91	3.58	3.73	3.82	4.08	3.75	3.88	3.8	1.78947	3.16667	2.7	1.4	4	2.16667
480	Male	Grade 4	10	No	1.92	4	2.92	2.55	3.64	2.25	2.92	4	4.7		1.16667	2		1.33333	1.66667
481	Female	Grade 4	9	No	1.92	2.45	3.08	1.45	2.27	1.33	2	4.75	4.2	2.94737				1	1.83333
482	Female	Grade 4	9	No	3.42	2.91	3.5	3.18	2.64	3.33	2.83	3.38	3			1.4	1.2	1.33333	2.16667
483	Female	Grade 4	10	No	2.83	3.18	3.67	3.27	3.82	3	3	4	4.5	3.57895	1.16667	2	2.2	1.33333	1.33333
484	Female	Grade 4	10	No	2.25	3.09	3.75	2.73	2.18	3.17	2.92	4.13	2.9	2.57895	1.08333	1.6	1.4	1.66667	2.5
485	Female	Grade 4	9	No	2.58	3.18	3.67	3.27	3.55	3.08	3	3.75	4.8	2.52632	1.25	1.6	1.8	1.33333	2
486	Female	Grade 4	9	No	2.42	2.73	3.5	3	3.82	3	2.42	4.38	3.8	2.63158		2	2.8	1	2
487	Female	Grade 4	10	No	2.25	2	3.33	3.18	3.45	2.58	2.83	3	3.2		1.25	1.4	1	1.16667	2.16667
488	Female	Grade 4	10	No	1.75	3	2.75	2.36	1.73	3.33	1.67	4.88	2.7	2.26316		3.1	2.6	1.66667	2.33333
489	Female	Grade 4	9	No	2.25	2.73	2.92	1.73	2.82	1.92	2.08	4.63	3.1	3.57895	1	1.7		1.16667	1.33333
490	Female	Grade 4	10	No	2.5	2.55	2.58	3	2.27	2.17	2.25	4.38	2.8	2.47368	2.16667	2.1	2.4	2.33333	2.16667
491	Female	Grade 4	10	No	3.33	2.27	3	4.18	2.09	3.08	3.17	2.13	1.8	2.68421	1.91667	2.3	3.2	2.66667	3
492	Female	Grade 4	10	No	3.33	3.45	2.92	2.82	3.27	2.58	3.33	3.75	2.9	2.10526	1.75	2	1.4	2.16667	2.5
493	Female	Grade 4	10	No	3.92	3.91	2.58	3.27	3.73	3.17	3	4.38	2.3	3.15789	1.5	2.6		1.33333	3
494	Female	Grade 4	10	No	1.42	2.36	2.92	1.73	2.55	1.92	1.08	4.13	3.9	3.47368	1.33333	1.7	2.8	1.16667	1.5
495	Female	Grade 4	9	No	2.17	2.91	3.75	2.09	2.55	2.08	2.17	3.75	4.4	3.36842	1.33333	2.2		1.33333	1.83333
496	Female	Grade 4	9	No	3.5	3.55	3.42	3.27	4.45	2.67	3.75	4.75	4.6	3.05263	1.16667	1.7	2.8	1.83333	2.83333
497	Female	Grade 4	10	No	3.75	3.55	2.83	3	4.55	2.83	2.67	5.13	4.1	3.31579	1.66667	2.7	3.2	1.5	2.66667
498	Female	Grade 4	10	No	3.58	3.09	3	2.64	4.45	3	2.5	4.38	4.2	2.68421	1.41667	2.1		1.16667	2.33333
499	Female	Grade 4	9	No	3.25	3.18	3.92	3.64	4.27	3.5	3.58	4.25	4.8	1.94737	1.25	1.5	1	2
500	Female	Grade 4	10	No	1.58	2.91	3.75	1.64	2.91	2.5	1.58	5.25	3.6	3.10526	1.5	2.2	3.4	1.33333	2.66667
501	Female	Grade 4	10	No	3.17	3.45	3.67	3.27	2.27	3.25	3.5	2.38	2.2	1.73684	1.33333	1.7	1.8	1.5	1.83333
502	Female	Grade 4	10	No	1.5	3	4.42	2.36	2.36	2.83	1.75	2.75	3.4	2.57895	3.08333	2.3		1.33333	3.5
503	Female	Grade 4	9	No	2	3.09	3.83	2.82	2.73	2.75	2.58	4.13	3.5	2.15789	1.91667	1.9	2.6	1.83333	3
504	Female	Grade 4	10	No	2.42	2.91	3.75	3	2.91	2.33	2.75	3.63	4.1	2.84211	1.75	2.2	2.8	1.66667	3
505	Female	Grade 4	9	No	2.5	3.27	3.08	3.45	2.91	3.17	3.5	4.25	3.5	2.68421	1.16667	1.4	1	1.16667	1.83333
506	Female	Grade 4	10	No	2.92	3.18	4	3.18	2.73	2.83	2.5	4	3.4	3	1.33333		2	1.16667	2.33333
507	Female	Grade 4	10	No	1.58	2.09	3.25	1.91	3	1.58	1.67	4.25	4.2	3.10526	1.5	2	2.2	1.83333	2.5
508	Female	Grade 4	9	No	1.58	2	2.17	1.18	2.27	1	1	4.38	3.1	2.63158		1.6	1.8	1.16667	1.66667
509	Female	Grade 4	10	No	2.33	2.64	5.17	2.91	3.09	2.33	2.42	5.75	4.5	2.68421	1.5	2.1	1.4	1.16667	2.16667
510	Female	Grade 4	10	No	3	2.27	2	1.36	2.91	1.83	2	5.13	2.2	3.05263	1.25		1.6	1.33333	1.66667
511	Female	Grade 4	10	No	3.17	3.27	3.17	3.64	3.36	3.58	3.58	3.13	2.8	2.73684	2.08333	2	2.8	2	2.83333
512	Male	Grade 5	10	No	1.83	2.64	4.75	2.91	2.27	2.5	1.83	2.5	3.7	3.78947	1.16667	1.6		1.16667	2
513	Male	Grade 5	11	No	2.08	2.91	3.67	2.18	3.18	3.25	2.92	2.88	3.1	2.47368	1.75	1.7		1.83333	1.5
514	Male	Grade 5	11	No	3.08	2.73	2.92	2.18	3.09	2.75	2.25	3.63	3.9	3.21053	1.16667	1.9		1.16667	2
515	Male	Grade 5	11	No	1.58	1.82	1.92	1	1.55	1.67	1.08	4.13	3.7	3.63158	1.25	1.9		1.5	2.16667
516	Male	Grade 5	10	No	3.67	3.82	2.75	3.18	4.36	3.08	3.33	4.25	3.6		1.33333	1.8	3	1.33333	2
517	Male	Grade 5	10	No	2.08	2.82	1.83	1.09	2.18	2.58	1.67	4.75	3.4	3.68421	1.33333	2.9		1.83333	2.16667
518	Male	Grade 5	11	No	3.08	2.45	3.33	3.09	2.82	2.33	2.08	4	3.6	2.57895		2.6		2.33333	2.83333
519	Male	Grade 5	11	No	3	2.64	2.42	2.18	3.09	2.17	1.5	4.88	4.7	2.57895	1				2.16667
520	Male	Grade 5	11	No	3.5	2.91	1.5	2.64	3.82	2	1.58	4.63	4.1	1.94737	1.91667	1.7		1.83333	2
521	Male	Grade 5	11	No	2.08	3.09	1.92	2.27	3	2.08	3.58	4.75	3.4	3.31579	1.5	2		1.5	2.5
522	Male	Grade 5	10	No	1.5	2	2.25	1.91	1.91	2.42	1	3.5	3.5	3.10526	1	1.6		1	1.16667
523	Male	Grade 5	10	No	2.5	2.91	3.67	2	3	2.42	1.92	4.38	4.2	3.21053	1.5		1.8	1.66667	3.33333
524	Male	Grade 5	11	No	3.25	4.55	2.5	3.45	3.91	3.5	3.75	3.5	4.5	1.73684	3		1.8	2	2
525	Male	Grade 5	11	No	2.92	3.09	2.83	2.73	1.73	2.58	2.33	4.75	4.5	2.21053	2.5	2.7	2.4	1.83333	3
526	Male	Grade 5	10	No
527	Male	Grade 5	10	No	3.17	2.73	3.58	2.82	2.55	3	2.58	3.25	2.9		2.41667	2.5	1.6		2.5
528	Male	Grade 5	10	No	2.33	3.55	4.08	2	3	2.5	2.5	3.5	3.8	3.78947	1.33333	2.3		1
529	Male	Grade 5	10	No	2.75	3.82	1.92	2.73	3.55	3.42	2.17	4.38	3.9
530	Male	Grade 5	10	No	3	2.2	2.83	2.27	3.82	1.92	1.75	4	4.7	3.26316	1.83333	2.4		1.83333	2.66667
531	Male	Grade 5	11	No	2.5	2.27	2.58	2.45	2.73	2.25	2.5	4.13	3.6		1.08333	1.9			2.33333
532	Male	Grade 5	11	No	3.75	3.36	3.33	3.55	3.55	3.42	3.5	3.5	3.8	3.05263	1.16667	1.3	2.8	1.16667	1.83333
533	Male	Grade 5	12	No	2.08	2.55	2.67	2.27	2.91	1.92	2.08	3.75	3.7	3		1.9		1.83333	1.83333
534	Male	Grade 5	11	No	2.67	2.82	3.83	3.09	4.27	3.17	3.67	4.38	4.5	3.57895	1.33333	2.1		1.16667	1.66667
535	Male	Grade 5	10	No	2.92	2.45	1.83	3.09	3.36	2.42	2.75	3.13	4.5	3.15789	1.83333		2.2	2	3
536	Male	Grade 5	10	No										1.57895	3.08333	1.6	1.4	2	2
537	Female	Grade 5	12	No	3.5	3.45	2.42	3	4.64	2.58	3.42	5.38	3.7
538	Female	Grade 5	11	No	2.67	3.55	3.33	3.27	4.36	3.42	2.33	4.25	4.7	2.26316	1.83333	2.7		2.5	2.83333
539	Female	Grade 5	11	No	2.17	3.18	3.75	3.27	2.64	3.08	2.42	2.75	3	2.15789	1.66667	2.7		2.33333	2.33333
540	Female	Grade 5	10	No	2.42	2.82	2.92	2.91	2.91	2.83	2.83	3.63	3.8	2.89474	1	1.7		1	1
541	Female	Grade 5	10	No	2.83	2.91	2.92	3.27	2.55	3.17	2.83	2.5	2.4		1.25	1.8		1.33333	2.16667
542	Female	Grade 5	10	No	2.17	2.73	2.25	2.36	3.55	2.58	2.08	5	4.6	3.05263	1.25	1.7	1	1	1.16667
543	Female	Grade 5	10	No	3.25	2.36	2.58	2	3.73	2.75	2.67	4.38	4.9	3.05263	1.08333	2.5	1	1.33333	2.16667
544	Female	Grade 5	11	No	3.5	3.82	3.17	3.18	4.45	3.5	2.58	3.63	4.9	2.36842	1.25	1.7		1.33333	1.33333
545	Female	Grade 5	11	No	2.58	2.36	3.08	2	2.36	2.33	2	4	3.7	3.05263		1.9		1.83333	2
546	Female	Grade 5	11	No	2	2.82	3.75	1.91	3.27	1.83	2.17	4.63	4.9	2.94737	1.25	1.8	2.6	1	2
547	Female	Grade 5	11	No	3.08	2.55	4.08	2.82	3.27	2.58	3.17	4.63	4.1	3.26316	1.66667	2.6		3.16667	2.16667
548	Female	Grade 5	11	No	3.42	3.64	3.5	2.36	3.36	3.67	2.83	3.63	3.9	3.15789	1.58333	2.6		1.5
549	Female	Grade 5	11	No	1.92	1.82	3.58	2.91	2.73	2.92	1.08	2.13	3.4	3.73684	1.66667	2.2		1.16667	1.83333
550	Female	Grade 5	10	No	3.25	2.55	2.33	2.36	3.36	2.17	1.67	4.75	2.5	2.68421	1.33333	2.1		1.33333	1.83333
551	Female	Grade 5	11	No	1.67	2.82	2.83	1.64	3.18	2	2.83	3.38	4.5	3.21053	1.58333	2.1		1.5	2
552	Female	Grade 5	11	No	3	2.73	4.25	3	2	3.5	3.42	5	3.3	2.68421	1.5	1.9		1.5	2.16667
553	Female	Grade 5	10	No	2.75	3.18	2.67	2.36	2.73	2.58	2.08	4.88	3.6	3.05263	1.58333	1.9		2.33333	2.83333
554	Female	Grade 5	10	No	1.83	2.09	2.08	1.82	2.45	1.92	1.92	4.38	3	3.42105	1.58333	2.4	2.2	1.5	2.16667
555	Female	Grade 5	10	No	2.17	2.82	3.25	2.91	2.55	1.83	2	4.25	4.2	3.63158	1.5	2.1		1.16667	1.66667
556	Female	Grade 5	10	No	2.17	3.55	2.92	2.18	2.18	1.42	1.92	5	2.9
557	Female	Grade 5	11	No	2.5	3.09	3	3.55	4.36	2.92	2.33	3.63	4.5	3.47368	1.41667	2		1	1.83333
558	Female	Grade 5	10	No	1.5	3	1.92	1.18	3	1.5	1.25	2.75	3.1	3.63158	1	1.6		1	1.5
559	Female	Grade 5	10	No	3.58	4.18	3.17	4	4.18	4.08	4.67	5	3	3.26316	1	2	3	1	2.5
560	Female	Grade 5	11	No	1.67	3	4.17	2.73	2.45	2.92	2.75	3.13	3.7	3.15789	1.41667	1.6		1.16667	2
561	Female	Grade 5	11	No	2.75	2.73	2.08	2.09	4.55	2.25	2	3.63	3.9	3.57895	1	1.4		1	1.16667
562	Female	Grade 5	10	No	3	2.82	3.5	2.55	3.27	1.92	2.67	4.5	3.1	2.94737	1.16667	1.9		1.5	1.83333
563	Female	Grade 5	10	No	2.83	2.82	2.92	3.09	3	2.58	3.08	4.25	4.1	3.57895	1.16667	2.1		1.16667	2
564	Female	Grade 5	10	No	3.67	3.82	2.58	2.27	4.27	3.25	3.5	4.5	4.5	2.10526	1.16667	1.5	1.2	1.16667	1
565	Female	Grade 5	10	No	1.92	2.73	2.5	2.73	2.91	2.5	2.08	2.5	3.2	2.84211		1.6		1	2.16667
566	Male	Grade 5	10	No	4.25	2.91	2.58	3.73	3.27	3.25	2.92	3.25	3	2.42105		2.2		1.66667	2.33333
567	Male	Grade 5	10	No	3.25	2.55	4	3.36	2.45	3.33	3.17	3	3.1	3.10526	1.16667	1.8		1.5	2.5
568	Male	Grade 5	11	No	1.33	1.82	1.75	1.27	1.91	1.75	1.58	3.38	1.6	3.15789	1.25	1.9		1.66667	2.83333
569	Male	Grade 5	11	No	1.58	1.82	2.67	1.91	2.45	2.42	2.42	4.25	4.2	2.73684	1.58333	2.2	1.6	2	2.83333
570	Male	Grade 5	11	No	4.17	2.64	3.67	3.27	4	3.33	3.33	4.25	3.6	2.73684	1.08333	2.1		1.16667	2.16667
571	Male	Grade 5	11	No	3.5	3	2.67	2.18	2.27	2.5	2.25	3.5	4.3	2.63158	1.5	2.3	2.4	1.66667	2.33333
572	Male	Grade 5	10	No	1.92	2.91	3.33	2.27	2.55	3.17	3.25	4.88	5	2.78947			2.8	2	2
573	Male	Grade 5	12	No	1.42	2.09	2.25	2.09	2.09	2.33	1.42	4.38	2.7	3.42105	1.08333	2.3		2	2.16667
574	Male	Grade 5	11	No	2.08	2.09	2.42	2.73	2.27	2.5	1.42	3.38	2.8	2.89474	1.33333	1.7	1	1.5	1.66667
575	Male	Grade 5	10	No	2.5	3	5	2.45	2.73	3.58	3.92	4.63	3.7	3.42105	1.08333	2.2		1.33333	2.83333
576	Male	Grade 5	10	No	3.17	2.73	2.92	2.73	4.18	2.58	2.92	3.88	3.8		1.25	2.3		1.83333	2.16667
577	Male	Grade 5	11	No	2.83	3.18	3.17	3.73	3.36	3.17	3	3.75	3	2.78947		1.9			2.16667
578	Male	Grade 5	10	No	3	2.64	3	3.55	3.45	3.08	3.67	2.63	3.2
579	Male	Grade 5	11	No	2.5	2.91	3.33	3.18	1.73	2.58	3.58	4	4.1	2.52632	1.08333	1.6		1.66667	1.5
580	Male	Grade 5	10	No	2.5	2.64	3.17	2.64	2.55	2.42	2.75	3.25	3.6	1.68421	2.41667	2.4		3	2.66667
581	Male	Grade 5	10	No	3.33	3.55	3.42	3.27	4.45	3.08	4.5	4.25	2.7	3.26316	1.08333	2		1.5	1.83333
582	Male	Grade 5	11	No	3.75	3.18	3.58	3.55	4.27	3.25	3.75	3.5	4.2	3.05263	1.58333	1.8		1.83333	2.5
583	Male	Grade 5	10	No	2.58	2.64	2.92	2.18	2.09	2.92	2.08	4	3.8	2.78947	1.41667	1.8		1	1.83333
584	Male	Grade 5	11	No	3.33	3.27	3.17	3.18	4.45	3	3	3.25	3.7	3.78947	1.08333	2.2		1	2
585	Male	Grade 5	11	No	2.42	2.73	3.5	2.55	2.36	2.75	2.58	4.38	3.5	3.36842	1.25	1.8	2.8	1.5	2.5
586	Male	Grade 5	11	No	3.58	3.18	2.58	2.64	4.64	2.92	2.58	3.75	4.1	3.26316	1.33333	2.3		1.33333	3
587	Male	Grade 5	11	No	2.5	2.91	2.25	1.82	2.91	1.92	1.92	3.5	3.9		1.66667	1.9		1	2.5
588	Male	Grade 5	11	No	2.67	3.09	2.92	3	2.55	3.08	3.17	3.88	3.3		1.25	2		2	1.5
589	Male	Grade 5	10	No	2	2.73	3.17	2.18	1.45	1.83	2.58	4.88	3.9	2.73684	1.58333	1.2		1	1.5
590	Male	Grade 5	11	No											1.08333	2		1	2
591	Male	Grade 5	10	No	2	2.64	3.75	1.91	2.82	1.33	1.42	4.38	4.4	3.36842	1.75	2.3		2.5	2.66667
592	Female	Grade 5	11	No	3.5	3	3.33	2.91	4	3	3.25	2.63	4	3.36842	1.33333		1.8	1	1.5
593	Female	Grade 5	11	No	2.83	3.45	3.5	3.36	3.64	3.08	3.92	3.5	2.8	2.89474	1.33333	2.4	2.8	1.66667	2.33333
594	Female	Grade 5	10	No	3.67	3.27	3.83	3.73	4.36	2.92	2.42	4.63	4.5	2.36842	2.16667	2.4	1.8	2	2.33333
595	Female	Grade 5	11	No	2.83	2.91	4.17	2.45	3.18	2.33	3	3.88	3.6	2.73684	1.41667	2.3	2	1.66667	2.66667
596	Female	Grade 5	10	No	1.5	2.18	3.5	2	1.82	2.58	2	3.13	3	2.10526	1.16667	1.3		1.33333	1.83333
597	Female	Grade 5	10	No	3.17	3.27	3.42	3.09	2.82	2.83	3.08	4.5	2.5	2.84211	1	1.8	2.6	1.33333	2.83333
598	Female	Grade 5	11	No	1.67	2.36	1.17	1.55	1.36	2	1.5	4.63	4.7	2.63158	1.25	1.8	1	1.33333	2
599	Female	Grade 5	10	No	3.25	2.45	2.92	1.45	3.82	1.75	2.58	4.38	4.4	3.73684	1.08333	1.8		1.16667	1.66667
600	Female	Grade 5	10	No	3.5	4	2.5	2.09	3.45	3.33	2.92	5.38	3.7	2.94737	1.5	2.5		2.5	2.33333
601	Female	Grade 5	10	No	2.08	2.91	3.42	2.55	2.55	2.5	2.42	3.88	4.2		1.25	1.7		1.16667	1.66667
602	Female	Grade 5	10	No	1.92	3.09	3.33	2.45	2.55	3.08	1.92	3.13	3.6	3.21053	1.25	1.8		1.33333	2.16667
603	Female	Grade 5	11	No	3.67	3.36	3.33	2.91	3.27	3.08	4.08	4.63	3.7	3.15789	1.41667	1.9	3.2	1.33333	2
604	Female	Grade 5	11	No	2.33	3.36	3	2.55	2.64	3.33	2.08	3.5	2.9	3	1.33333	2	1	1.83333	2.66667
605	Female	Grade 5	11	No	2.83	3	3.25	2.55	2.09	1.92	2.83	3.88	4	3.78947	1.16667	2.6		1.16667	2
606	Female	Grade 5	11	No	3.42	3.27	3.92	3.09	4.18	3.17	3.25	4.38	3.7	3.05263	1.08333	1.7	1	1.16667	1.66667
607	Female	Grade 5	10	No	2.17	2.27	3	2	3.36	2.42	3.08	3.75	4.1	3.31579	1.25	1.8	2.6	1	2.5
608	Female	Grade 5	10	No	2.92	2.73	3.33	2.55	3.91	3.33	3	4.13	3.8	3.21053	1.08333	2	1.2	1	1.66667
609	Female	Grade 5	10	No	2.83	2.82	3	2	2.82	3.08	2	3.88	3.8	2.84211	1.33333	2.1	1.8	1.66667	2.5
610	Female	Grade 5	11	No	2	2.45	3.42	2.18	3.18	2.08	1.42	3.88	3.9	3.05263	1.25	1.8	1	1.33333	1.83333
611	Female	Grade 5	10	No	2.92	2.64	2.75	2.64	3.82	2.33	1.92	3.75	3.9	2.47368	1.25	1.8	1.4	1.5	1.83333
612	Female	Grade 5	11	No	3.42	3.36	3.33	2.82	3	2.75	2.67	4.13	4	3.36842	1.33333	1.9		1.16667	1.83333
613	Female	Grade 5	11	No	3.5	3.36	3.42	3.45	3.91	3.42	3.08	3.75	4	2.84211	1	2.3	2.8	1.16667	2.83333
614	Female	Grade 5	11	No	1.33	1.91	2.5	2.55	2.36	2	2.25	5	4	2.73684	2.66667	1.9		1.33333	2.5
615	Female	Grade 5	10	No	1.83	2.82	2.42	2.82	2.55	2.75	1.83	3	3.5		1.08333	1.3		1	1.16667
616	Female	Grade 5	11	No	3.58	3	3.42	2.82	4.82	2.75	2.67	4.63	4.5	3.31579	1.33333	2.1	2	1.16667	2.16667
617	Female	Grade 5	10	No	2	2.45	4	2	2.73	2.33	2.58	2.88	2.5	2.26316	1.41667	1.6		1.5	1.16667
618	Female	Grade 5	10	No	1.92	3.73	3.25	2.64	2.73	2.17	2.25	4.75	3.1	2.36842	1.5	2		2.33333	2
619	Female	Grade 5	11	No	1.83	2.64	3	2.45	2.09	2.25	1.25	2.88	2.7	3.36842	1.16667	1.8	2.8	1	2
620	Female	Grade 5	11	No	3.5	3.64	2.67	3.18	4.45	3.58	3.75	3.88	2.7	3.47368		2.7		1.16667	1.83333
621	Female	Grade 5	10	No	2.17	2.55	2.92	1.91	3.18	2.58	1.83	2.75	2.6	2.21053	1.41667	1.9		2.33333	2.5
622	Female	Grade 5	11	No	3.25	3.36	3	1.82	2.82	3.25	2.58	3.88	3.7	1.63158	1.83333	1.8	2.4		2.16667
623	Female	Grade 5	11	No	3.83	2.82	3.5	3.82	2.91	2.83	1.75	4.25	4.2		2.25	2.4	1.2	2.16667	2.16667
624	Male	Grade 4	10	No	3.08	2.91	3.36	3.64	2.7	2.6	2.25	4.38	2.6	2.84211	1.08333	2.7	1.8	1	2.33333
625	Male	Grade 4	10	No	2.92	3.18	3.25	3.09	2.55	2.73	3	4.25	2.4			1.7	2.2	1.33333	2
626	Male	Grade 4	10	No	3.08	2.64	3.17	2.9	2.55	2.25	2.67	4.5	2.5	2.89474	1.5	2.2		1.33333
627	Male	Grade 4	10	No	2.67	3.36	4.42	2.36	3.27	3.58	2.33	4.25	3.1	2.15789	1.16667	1.5	1.6	1.5	2
628	Male	Grade 4	10	No	2	2.45	2.75	2.18	2.36	2.42	2.08	3.38	3.4	2.73684	1.33333	1.8	2	1.33333	2
629	Male	Grade 4	9	No	1.58	2.64	5.17	2.36	2.18	1.67	2	4.88	3.6	3.26316		2.6	2.6	1.5
630	Male	Grade 4	9	No	4	3.91	4.67	4.36	3.45	3.5	3.83	4.63	3.4	2.47368	1.83333		3	1.33333	2.33333
631	Male	Grade 4	10	No	3.25	3.27	3.67	3	3.36	3	2.42	3.88	4.2	2.21053	1.91667	2.2		2.16667	1.33333
632	Male	Grade 4	9	No	2.67	2.73	3.33	2.45	4.09	2.92	3.58	3.75	3	3.21053		3	2.6	1.5	3
633	Male	Grade 4	9	No	4.17	4.09	4.17	3.36	3.45	3.5	3.33	2.25	3.5		1.58333	2.5	2	2	3
634	Male	Grade 4	10	No	3.33	2.73	2.42	1.91	3.18	2.42	1.25	5	4.8	3.21053	2.16667		2.4	1.83333	2.5
635	Male	Grade 4	9	No	3.5	3.18	3.58	3.45	3.45	3.25	3.67	3.13	3.3		1.33333	1.6	1.8	2	2.16667
636	Male	Grade 4	10	No	2.83	3.64	3	4	3.64	3.25	3.67	3.5	3.5	2.36842	1.41667			1.66667
637	Male	Grade 4	9	No	3.42	2.91	3.58	2.91	3	3.08	3.25	4.13	3.2	2.26316	2.25	1.8	3	1.66667	2.33333
638	Male	Grade 4	11	No															2.66667
639	Male	Grade 4	8	No										1.78947	1.75	1.7	1.4	1.83333	2.66667
640	Female	Grade 4	10	No	3.33	3.27	3.42	3.36	4.09	3.5	3.42	4.25	4.4	3	1.58333	1.9		1.5	2
641	Female	Grade 4	10	No	2.92	2.73	2.92	3.09	2.09	2.17	2	3.5	2.6	2.21053	1.16667	1.9	2.6	1.33333	1.83333
642	Female	Grade 4	10	No	1.92	3.18	3.25	4	2.55	2.33	2.42	3.25	2.3	3.10526	1.5	2	3.6	1.33333	2.5
643	Female	Grade 4	10	No	2.08	3.27	4.33	2.64	4.27	3.5	3.33	5.13	5	2.52632	1.41667	1.4	2	1.5	2
644	Female	Grade 4	9	No	3.17	2.45	4.42	3.09	3.09	3.08	2.33	3.5	3.5	3	1.16667	2	2.6	1.16667	2
645	Female	Grade 4	9	No	3.25	2.82	2.92	2.64	2.45	2.75	2.08	3.38	3.9	2.84211	1.08333	1.7	3.2	1	1.5
646	Female	Grade 4	9	No	2.33	3.18	4.25	2.91	2.45	2.5	2.08	4.38	4.3	3.36842	1.5	2.2		1.66667	2.5
647	Female	Grade 4	9	No	2.5	2.73	4.42	3.36	3.18	2.5	2.5	3.63	4.3	2.73684	1.33333	2	2.6	1.66667	1.83333
648	Female	Grade 4	10	No	2.58	3.36	3.42	2.55	3.18	2.25	1.5	2.63	3.2	2.94737	1.33333	1.5	2	2
649	Female	Grade 4	9	No	2.42	2.45	2.17	1.18	2.09	2.08	1.08	3.38	3.3		1	2.2	2.8	1.16667
650	Female	Grade 4	10	No	3.42	3.64	4.42	2.73	3.18	3.67	4	3.38	3	2.15789	1.91667	2	2	1.5	1.83333
651	Female	Grade 4	11	No	3	3.09	3.67	2.45	2.18	3.42	1.92	3.63	3.4		1.58333	2.2	2.6	2.16667	2.66667
652	Female	Grade 4	9	No	2.83	3.55	2.92	3.36	3.82	2.58	3	3.75	3.5	2.10526	1.16667	1.4	1.6	1.33333	1.5
653	Female	Grade 4	10	No	2.83	3.64	3.08	3.91	2.09	4.5	3.92	5.13	2.8	3	2.33333		1.8	1.66667	2.5
654	Female	Grade 4	10	No	4.5	4	1.67	3.18	3.73	3.17	4.08	4	3	2.52632	1.75		2.6	1.83333	2.33333
655	Female	Grade 4	9	No										3.10526	1.33333	2.1	2.8	1.5	2.33333
656	Female	Grade 4	9	No	2.5	3.27	3.33	3.45	3.18	3	3	4.88	3.7	3.10526	1.75	1.7	3.4	1.5	2.5
657	Female	Grade 4	10	No										2.73684	1.25		1		1.16667
658	Male	Grade 4	11	No	2.5	2.91	3.08	1.45	4	1.92	1.58	4.5	2.3		1	1.7	1.4	1.16667	1.5
659	Male	Grade 4	9	No	2.25	3.27	4	3.73	2.55	3.92	3.08	3.25	3.6	2.68421	1.33333	2.4		2.16667
660	Male	Grade 4	10	No	4.25	3.45	2.83	2.91	2.55	2.75	3.42	4.75	2.9		1.58333	2.6	2.8		2.5
661	Male	Grade 4	10	No	2.42	3.45	4.33	3.36	3	3.42	3	3.5	3.3		1.58333	2.2		2	1.83333
662	Male	Grade 4	11	No	3.25	3.64	3.92	3.36	3.64	3.42	3.83	4.13	4		2.33333			1.83333	2.16667
663	Male	Grade 4	10	No	2	2.09	3.67	2.45	2.09	2.17	1.92	4.88	3.8	2.42105	1.75	1.8	2	1.33333	2
664	Male	Grade 4	10	No	2.67	3.64	4.08	3.45	3.55	3.67	4.17	3.88	3.7	2.05263	1.58333	1.7	1.6	1.5	2.16667
665	Male	Grade 4	10	No	3	2.73	4	2.73	2.55	3.33	2.42	3.5	3.5	2.68421	1.08333	1.3	2.6	1.16667	1.33333
666	Male	Grade 4	10	No	3.58	3.18	3.25	2.27	2.64	2.67	3.17	4.5	3.9	3.10526	1.33333	2.8	2.2	1.83333	2.5
667	Male	Grade 4	9	No	2.42	3.64	3.83	2.36	3.55	3.33	2.58	4.75	3.7	2.84211	1.33333	2.1	3	1.33333	1.66667
668	Male	Grade 4	9	No	2.67	2.27	3.25	1.09	1.82	1.33	1.5	4.63	3.1	2.94737	1	1.6	2.2	1	1.66667
669	Male	Grade 4	11	No	2.5	2.73	3.92	2.73	2.45	2.58	2.08	3.63	2.5		1.66667	2.1	2	2	2.33333
670	Male	Grade 4	9	No	3.75	3.36	3.67	2.82	1.91	2.42	3.83	4	2.2	2.57895	2.41667	2.3	2	2.33333	3.16667
671	Male	Grade 4	11	No	2.83	3.36	2.75	3	3	3.58	2.75	3.75	3.7	1.78947	2.33333	2.4	2	1.66667	3
672	Male	Grade 4	9	No	2.58	2.64	2.75	2.82	2.82	2.33	2	4.25	4.2		2.33333	2.3	2.4	2.16667	2.66667
673	Male	Grade 4	9	No	1.75	1.91	1.58	1.45	1.27	1.83	1.17	2.88	3	3.57895	1	2	2.4	1	3.5
674	Male	Grade 4	10	No	3.83	2.36	4.67	1.09	2.18	3.58	2.25	3.63	3.6		1.66667	1.8	2	2.66667	2
675	Male	Grade 4	11	No											1	1.7	2.4	1	1.5
676	Male	Grade 4	9	No										2.52632	1.16667	1.4	2	1.33333	2.33333
677	Male	Grade 4	10	No											1.16667	2	1.6	1.33333	2.83333
678	Male	Grade 4	9	No										3.26316	1.75	1.7	3.2	1.5	3
679	Male	Grade 4	9	No											1.41667	1.9	2	1.66667	1.83333
680	Female	Grade 4	9	No	1.75	3	3.5	3.36	4.18	2.92	2.17	4.75	2.3	2.47368	1.66667	1.7	2.6	1.66667	2.83333
681	Female	Grade 4	9	No	2.92	2.64	2.75	3	3.73	2.5	2.92	4.75	3.8	2.94737	1.33333	1.8	1.8	1.5	2.5
682	Female	Grade 4	9	No	3.5	3.27	3.25	3	4	2.67	2.58	4	4.6			1.7		1.33333	2.16667
683	Female	Grade 4	9	No	1.75	2	2.58	1.82	2	2	1.5	5	3.3	2.68421	1.41667	2	2	1.33333	2.5
684	Female	Grade 4	9	No	2	1.73	3.33	1.73	2.55	2	1.58	4.25	3.4		1.33333	2	2.2	1	2
685	Female	Grade 4	9	No	2.5	1.36	2.25	1.64	3.82	2.17	1.5	4.75	4.1	2.94737		2.4	3.2	1	2.16667
686	Female	Grade 4	10	No	1.75	3.27	3.75	3.09	2.73	2.75	1.67	3	3.1	2.84211	1.33333	2	2.2	1.16667	2.33333
687	Female	Grade 4	10	No	3.08	2.36	4.17	2.27	2.64	2.67	1.92	4.13	3.7	2.57895	1.83333	2.3	1.2	1.33333	2.66667
688	Female	Grade 4	10	No	2.67	3.09	3.75	2.82	3.55	2.67	2.17	4.5	4.6	3.15789		2	2.8	1.5	2.66667
689	Female	Grade 4	9	No	1.5	2.55	3	1.73	2.55	2.5	1.33	3	2.8	3.05263	1	1.6	3.4	1	2.5
690	Female	Grade 4	9	No	2	2.27	3.42	1.73	2.36	1.92	1.75	4.75	5.1		1.33333	1.7	1.4	1	2.33333
691	Female	Grade 4	11	No											1				1.33333
692	Female	Grade 4	9	No	3.17	3.64	3.08	3.45	2.91	3.42	2.67	3.38	3.3			1.8		1.16667	2
693	Male	Grade 5	11	No	2.42	3.36	4	1.73	3.55	3	3	2.25	4.4	2.73684		2		2	2.16667
694	Male	Grade 5	11	No	2.5	2.27	2.83	2.82	3.64	1.83	2.92	4.13	3.5	2.89474	1.08333	2.2	2.6	1.5	2.33333
695	Male	Grade 5	10	No	4.25	2.91	3.33	2.64	2.82	2.67	2.42	3.88	4.4	2	1.16667	1.4		1.33333	1.33333
696	Male	Grade 5	11	No	2.92	3.45	3.08	3.18	2.91	2.92	3	3.25	2.9	2	1.75	2.6		3	2.66667
697	Male	Grade 5	11	No	4.08	4	2.5	3.45	4.45	3.5	3.17	4.63	3.1	2.31579	2.25	2		2.16667
698	Male	Grade 5	11	No	3.33	4.27	4.33	3.36	2.36	2.42	2.33	3.25	3.9	2.57895	1.83333	2.3		1.83333	2.66667
699	Male	Grade 5	11	No	2.25	2.18	4.17	1.73	2.09	1.75	2.33	4.25	5.1	2.78947	1.83333	2.1	2	1.5	2.66667
700	Male	Grade 5	12	No	4.17	3.91	3.5	3.18	4.09	3.33	4.33	4	3.8	2.78947	1.5	2.6	3	1.5	2.5
701	Male	Grade 5	10	No	2.42	2.73	3.83	2.91	3.36	3.25	2.83	3.38	3.1	2.78947	2.33333	2.2	2.4	2	3
702	Male	Grade 5	11	No	2.75	2.73	3.92	2.64	2.64	2.75	2.17	4.63	4.5	3.15789	2.08333		3	2.16667	3.5
703	Male	Grade 5	10	No	2.83	3.36	3.33	2.91	3.09	3.08	3	3.88	2.6		2	2.1	2.2	2.33333	2.33333
704	Male	Grade 5	11	No	3.08	2.64	3	2.91	3.55	2.67	2.67	3.75	3.5	2.84211	1.25	1.5	1.8	1	2
705	Male	Grade 5	10	No	3.08	3.27	3.83	3.27	2.64	3.08	3.25	3.38	3	2.31579	1.25	2	2	1.66667	2.16667
706	Male	Grade 5	11	No	3.33	2.55	3.75	3.36	2.82	3.75	3.75	2.88	2.7	2.47368	1.25	1.6	2.4	1.33333	1.83333
707	Male	Grade 5	12	No	3.17	3.73	2.75	2.64	3.18	2.75	1.92	4.88	4.4	3.10526	1.33333	2.1	3.8	1.5	2.5
708	Male	Grade 5	11	No	3	3.73	5	3.18	4	4.17	4.08	3.75	3.7		1.5			1.33333	2
709	Male	Grade 5	11	No	2	2.45	3.33	3.18	2.36	2.5	2.5	3.13	3	2.63158	1.66667		2	1.16667	2.5
710	Male	Grade 5	11	No	2.08	2.55	3.17	3.09	2	2.25	2.17	3.5	2.8	3.31579	1	1.6		1	1.5
711	Male	Grade 5	11	No	3.83	3.27	3.08	3.27	3.27	3.67	3.75	4.25	3.3	3.21053	1.41667	1.9	2.6	1.33333	1.33333
712	Male	Grade 5	11	No	2.08	3	4.17	2.27	3	2.25	1.67	4.63	4.2		2.08333	2.4	2.4	1.66667	2.33333
713	Male	Grade 5	11	No	2.5	2.45	3.42	2.09	2.27	2.58	2.67	4.75	3.5	2.63158	1.41667	1.7	1.8	1.16667	1.83333
714	Female	Grade 5	10	No	3.33	2.27	3.5	3	2.64	2.92	3.42	4.13	4.3	2.21053	1.83333	2.3	1.8	1.5	1.83333
715	Female	Grade 5	11	No	4.33	2.91	2	3.73	5.45	3.58	4.17	2.5	4.5	1.94737	1.33333	1.5	1.8	1.16667	1.16667
716	Female	Grade 5	10	No	3	2.82	2.92	3.73	3.36	3.25	2.33	4.5	2.4	2.31579	1.25	2	1.8	1.16667	1.5
717	Female	Grade 5	10	No	2.75	3.09	3.08	2.55	3.36	2.67	3.17	3.38	2.6	2.21053	1	1.6	2.2	1.33333	1.66667
718	Female	Grade 5	10	No	2.92	2.36	2.92	1.91	2.18	1.92	2.33	3.5	3.2		1.75	1.4	1.8	1.66667	2
719	Female	Grade 5	10	No	2.92	2.55	3.92	2.64	3.09	2.75	3.42	5.25	3.5	2.52632	1.16667		2.4	1.16667
720	Female	Grade 5	12	No	3.25	2.91	2.75	3.82	2.73	2.83	3.08	4.25	3.8			2.3		1.16667
721	Female	Grade 5	11	No	3.33	3.18	3.75	2.82	3.73	3.08	2.75	4.13	3.9	2.63158	1.58333	2	2.4	1.16667	2.33333
722	Female	Grade 5	10	No	4.33	3.18	3.17	4	3.73	3.17	3.58	3.88	3.4	2.63158	1.41667	2.4	2.2	2	3
723	Female	Grade 5	11	No	2.5	2.82	3.83	3.27	2.09	3	2.67	3.5	3.2	2.42105		1.6	1.6	1.33333	1.83333
724	Female	Grade 5	11	No	3.5	2.45	2.83	2.45	3.09	2.67	2.25	3.38	3.1	3.21053	1.41667	1.8	2	1.5	2.5
725	Female	Grade 5	11	No	3	3.18	2.75	3.09	3.45	3.25	3.17	3.25	4	3.26316	1.5		2.8	1.16667
726	Female	Grade 5	10	No	2.75	2.64	3.25	2.73	3.27	2.67	2.92	3.88	3.3	3	1.33333	1.8	2	1.66667	2.5
727	Female	Grade 5	11	No	3.67	2.73	3.25	3.82	3.45	3.75	3.67	4.38	3.1	2.31579	1.41667	1.7		1.83333	1.83333
728	Female	Grade 5	10	No	3.67	3.45	3.75	3	2.09	2.58	2.75	3	3.1	2.52632	1.66667	2.3	1.8	2.33333	2.83333
729	Female	Grade 5	10	No	3.58	2.36	3.08	3.18	1.91	3.42	2.67	4	4.1			2	3.2	1.83333	2.66667
730	Female	Grade 5	11	No	2.5	2.45	2.75	2	3.45	2.42	2.25	5	3.5	3.42105	1.5	2.2	2.2	1.5	2.16667
731	Female	Grade 5	11	No	2.17	3	3.08	3.45	3.18	3	3.33	3.25	2.6		1.41667	2.5	2.8	1.83333	2.33333
732	Female	Grade 5	10	No	2.08	2.82	3.92	2.64	3.36	3	2.42	4.38	4.3	2.78947	1.25	1.7	2.6	1.16667	2
733	Female	Grade 5	11	No	3.17	2.73	2.5	2.09	2.55	3.25	2.58	3.88	2		1.41667	1.5	1.2	1.33333	1.83333
734	Female	Grade 5	10	No	3.67	3.45	3.5	4.45	3.73	3.75	3.67	3.25	3.4	2.47368	2.25		1.8	2.66667	2.83333
735	Female	Grade 5	11	No	2.83	3.45	3.17	3.91	3.91	3.75	3.25	3.25	3.8	2.31579		2.2		2	2
736	Female	Grade 5	11	No	2.67	2.64	3.17	3.45	2.55	3.58	3	3.5	2.1	2	1.25	1.3	2.2	1.16667	1.66667
737	Female	Grade 5	10	No	3.17	3.18	3.67	3.55	3.18	3.17	3.33	3.75	3	2.05263	1.5	1.9	3	1.66667	2.16667
738	Female	Grade 5	11	No	2.75	3.09	2.92	2.73	3.73	2.67	2.67	4.38	3.7	3.10526	1.16667	1.5	2.6	1.16667	2.16667
739	Female	Grade 5	10	No	2.75	3.09	3.08	3.27	2.64	2.67	2.42	4.63	4.6	2.47368		1.6	1.8	1	1.83333
740	Female	Grade 5	10	No	3.75	2.36	3.17	3.55	2.55	2.83	2.75	3.88	2.4	2.47368	2	1.8	2.4	1.83333
741	Female	Grade 5	10	No	2.92	3.45	4	4.36	3.18	3.5	3.17	3.38	4.2	2.05263	1.25	1.7	1.8	1.33333	1.5
742	Male	Grade 4	9	No	3	4	3.67	3.73	2.91	3.67	3.92	4.75	2.7	2.52632	2.08333	2		1.66667	2.33333
743	Male	Grade 4	9	No	2.67	3.09	3.42	1.82	2.55	1.75	2.25	3.88	3.8	2.68421	1.66667	1.9	2.6	1.33333	2.33333
744	Male	Grade 4	10	No	2.67	3.09	2.92	2	3.09	2.17	2.08	4.38	4.8	2.63158	1.33333	1.7	1.6	1.16667	1.66667
745	Male	Grade 4	10	No	3	3.73	3.42	3.64	3.55	3.17	2.92	3.5	3			2.1	1.6	1.83333	2.5
746	Male	Grade 4	9	No	1.83	2.36	2.92	2.18	3.55	2.17	1.75	3.25	3.8	2	1.41667	2	2.4	2	2.33333
747	Male	Grade 4	9	No	5.08	3.36	3.83	2.73	4.36	3.33	3.75	4.5	3.7	2.05263	1.83333	1.8		2.16667
748	Male	Grade 4	9	No										3.05263	1.25	1.7		1	1.83333
749	Male	Grade 4	9	No	1.58	2.27	3.17	2.09	3.55	1.75	1.75	3.5	3.9	3.63158	1.25	2.5	2	2.16667	3.33333
750	Male	Grade 4	9	No	4.17	3.09	2.42	2.82	4.09	2.75	3.42	4.38	3.6	2.31579	2.83333	2.3		2.33333	2.16667
751	Male	Grade 4	9	No	3.08	3.36	4.08	3.18	2.64	3.42	3.17	3.75	4	3.15789	2.25	2.2	2.6	3	2.66667
752	Male	Grade 4	9	No	2.17	2.36	3	2.73	2.82	1.83	1.83	3.5	3.8	3.42105	1	1.5	2.6	1.16667	2
753	Male	Grade 4	9	No	2.75	3.82	3.33	2.45	3.09	2.75	2.83	3.63	3.8	3.36842	1.33333	2		1.5	2.66667
754	Male	Grade 4	9	No	1.17	1.64	2.08	1.82	2.09	2	2	5	2.6	3.10526	2.58333	2.8	2.8	2.33333	3
755	Male	Grade 4	8	No	3.08	3.36	3.58	3	3.18	3.42	3.25	4.5	4	2.15789	3.16667	2.7	2.2	3.5	2.5
756	Male	Grade 4	10	No										2	2.25	2.3		1.83333	2
757	Male	Grade 4	9	No	4.08	3.18	3.58	3.73	3.73	3.83	3.33	4	3.6	2.26316	1.75	1.8	1.8	2.16667	3
758	Female	Grade 4	9	No	1.58	2.27	3.17	2.09	3.55	1.75	2.17	3.5	3.9	3.31579	1	1.6		1	2.33333
759	Female	Grade 4	9	No	2.08	2.27	3.92	1.82	2.82	2.5	2.08	3.5	4.1	3.52632		1.7		1	2
760	Female	Grade 4	9	No	2.75	2.73	3.42	2.73	4.27	2.08	1.83	4.5	4.3	3.26316	1	2		1	2
761	Female	Grade 4	9	No	3.25	3.64	2.58	4	3	3	3.17	4.5	2.7		1.5	1.6	2.2	1.16667	1.5
762	Female	Grade 4	9	No	2.67	3.55	3.42	2.82	3.64	2.08	2.75	2.88	3.7		3.08333	2	2	1.33333	1.33333
763	Female	Grade 4	9	No	2.42	2.27	3	2.27	3.27	2.08	2.08	4.88	4.3	3.15789		2.2		1.5
764	Female	Grade 4	9	No	1.83	2.64	3.83	2.64	2.82	1.92	2.42	4	3.4	1.63158		1.5	1.8	1.83333	1.66667
765	Female	Grade 4	9	No	3.42	3.55	3.25	2.64	3.36	2.83	3.08	4.25	4.2	3.57895	1.25	1.4	2.8	1	2.66667
766	Female	Grade 4	8	No	2.67	3.18	2.58	2.27	3.27	1.5	2.25	2.63	3.6	2.89474	1.5	2	1.6	1.5	2.5
767	Female	Grade 4	9	No	2.25	3.18	2.92	2.09	2.55	2.08	2.33	3.75	3.8	3.57895	1.16667	1.4		2	2.83333
768	Female	Grade 4	9	No	1.67	2.73	3.08	2.09	3.18	2.42	2.5	3.88	3.6	3.10526	1.16667	2.3		1.16667	2.33333
769	Female	Grade 4	9	No	2.08	2.82	4.58	2.73	2.36	1.5	1.75	3.75	3.4	2.47368	1.75	1.9		1.66667	2.5
770	Female	Grade 4	8	No	2.83	3.27	3.33	3.27	3.36	2.83	3.08	3.88	4	3.47368	1.16667	1.9	3.2	1.16667	2.5
771	Female	Grade 4	10	No	2.58	3	3.17	2.82	3	3	2.42	3.63	3.5		1.16667	1.9	1.6	1.5	3
772	Female	Grade 4	9	No										3.15789	1.16667	2.3		1	2
773	Female	Grade 4	9	No	3.17	3.27	3.17	3.55	3.82	3.17	3.17	3.75	4.5	3.36842	1.25	1.3		1.16667	1.83333
774	Female	Grade 4	9	No	3	3	2.92	3.45	2.45	2.58	3.08	2.63	1.8	3.26316	1.66667	2.6	1.2	1.83333	2.66667
775	Female	Grade 4	9	No	2.67	1.64	3.25	2.18	2.09	2.25	2.17	4.13	3.7	2	1.16667		1.4	2.33333	2.66667
776	Female	Grade 4	10	No	3.83	3.64	2.67	2.64	3.73	3.25	3.08	4.13	3.5	2.26316		1.7	1.6	1.66667	2.16667
777	Female	Grade 4	9	No	3.25	2.82	2.92	2.36	3.09	2.58	3.08	3.5	3	2.42105	2.41667	1.8		1.66667	2
778	Female	Grade 4	9	No	1.42	2.27	1.58	1.82	2	1.33	1.58	4.5	3.6	3.21053	1.58333	1.5		1	2.33333
779	Female	Grade 4	10	No	2.67	2.55	3	2.45	3	2.58	2.33	4.75	3.8	2.15789		2.3	3.4	3.5	2.5
780	Female	Grade 4	9	No										3.05263	1.41667	2.3	1.8	1.5	2.5
781	Male	Grade 4	9	No	3.67	3	3.58	2.18	4.09	2.92	4	3.5	4.7	3		3.5	3.4	1.5	3.66667
782	Male	Grade 4	9	No	3.25	2.73	4.08	3.73	3.73	2.08	2.67	3.88	2.6		1.83333	2.9	2		2.33333
783	Male	Grade 4	9	No	2.92	3.18	3.83	2.45	2.27	3.08	3.08	3.75	4.4	2.73684	1.41667	1.8	2.8	1.16667
784	Male	Grade 4	9	No	2.67	3.82	3.92	3.18	3.27	2.83	2.33	3.5	3.8	3.68421	1.16667	3.1		1.66667	1.66667
785	Male	Grade 4	8	No	2.42	2.55	2	2.18	2.64	2.58	2.08	4.63	3.8	2.78947	1.58333	1.8	2.6		2.66667
786	Male	Grade 4	8	No										2.05263		2	1.4	1.16667	1.83333
787	Male	Grade 4	9	No	2.58	3.18	3.42	3.45	3.91	3.33	2.17	3.88	3.6	2.68421		2.3	2.6	1.16667	2.83333
788	Male	Grade 4	9	No	3.92	3.64	4.67	3.55	4.45	3.42	3.42	4.25	4.8	2.21053	1.25	1.9		1.83333	2
789	Male	Grade 4	9	No	3.92	4.18	3.67	3.82	3.27	4.33	4	3.75	3.9	2.84211	2.41667	3.1	1.4	2.83333	2.66667
790	Male	Grade 4	9	No	1.5	3.82	4	3.27	3.18	4.17	2.58	3.38	4.4	2.31579	2.16667	2.5	1.6	2.83333	3.16667
791	Male	Grade 4	9	No	3.75	3.82	2.83	2.82	3.18	3.33	4.08	3.75	2.7	3.05263	1.25	1.5	1.8	2.66667	2
792	Male	Grade 4	9	No	3.92	3.36	4.67	2.82	3.36	3.08	2.67	4.63	3.9	2.63158	1.5	1.4		1.83333	1.16667
793	Male	Grade 4	10	No	3.75	2.73	2.83	2.55	2.91	1.67	2.58	4.75	4.9	2.05263	1.41667	1.9	1.8	1	2
794	Male	Grade 4	9	No	2.33	3	4.08	2.27	2.73	2.5	2.33	4.13	4.3	2.52632	1.5	1.3	3.2	2	1.66667
795	Male	Grade 4	10	No										2.05263	1.66667	2.3	1.4	1.83333	1.16667
796	Male	Grade 4	9	No	3	2.82	3.25	3.36	3	2.67	2.92	3.63	3		1.91667			2.33333	3.66667
797	Male	Grade 4	9	No	3.75	2.36	2.83	2.27	3.82	2.42	2.58	3.88	4.5	2.68421	1.08333	1.5	1.8	1.33333	2.33333
798	Male	Grade 4	10	No										2.68421			2.6	2.33333	1.66667
799	Male	Grade 4	9	No	3.08	3.18	3.92	2.45	3.55	3.33	3.75	4.88	4.2	1.63158	3.58333		2.2	3.5	3.5
800	Male	Grade 4	9	No	2.58	2.91	3	3.27	2.36	3.83	3.67	3.5	2.9	2.42105	1.75	1.8		2	2.5
801	Male	Grade 4	11	No	3.83	3.55	4.17	3	4	3.33	2.92	4.25	3.9	2.42105	1.16667	1.8	2.6	2.16667	2.16667
802	Male	Grade 4	9	No	2.75	2.73	3.42	2.45	3.09	3.08	2	3.38	2.5			1.7			1.83333
803	Female	Grade 4	9	No	3.25	3.64	2.42	3.18	3.45	3.17	3.75	3.88	3.2	2.21053	1.5	2.1	3.2	1.16667	2.5
804	Female	Grade 4	9	No	3.75	3.18	2.92	2.36	2.82	2.83	3	4.5	3.6	3.36842		2.4		1	2
805	Female	Grade 4	9	No	3.25	2.82	3.5	2.55	3.45	2.5	2.83	4.25	4	3.31579	1.16667	1.9		1.16667	1.5
806	Female	Grade 4	9	No	3.08	3.64	3.75	2.64	3.18	2.83	3.25	3.88	4.4	3.05263	1.66667	2.6		1.33333	2.5
807	Female	Grade 4	9	No	2.92	3.36	3.92	2.27	2.45	2.75	2.08	3.38	3.1	3.10526	1.16667	1.7		1	1.33333
808	Female	Grade 4	9	No	2.83	3.27	3.83	2.36	3.18	3	2.92	4.13	4	2.78947	1.08333	2	2.6	1.16667	2.5
809	Female	Grade 4	9	No											1.08333	1.9	1.2	1.33333	2.16667
810	Female	Grade 4	9	No	1.83	1.64	2.75	1.91	2.45	1.92	2.17	2.25	2.9		1	1.4	1.2	1.33333	1.83333
811	Female	Grade 4	9	No	2.25	3.64	2.92	3	3.64	3.25	3.25	4.25	3.5
812	Female	Grade 4	8	No	1.67	2.55	3.25	1.73	2.45	2.92	1.25	3.63	3.8	2.68421	1.25	2.5	1.6	2	2.16667
813	Female	Grade 4	8	No	4.67	3.73	4.08	3	4.91	3.17	3.92	4.88	4.1	3.26316	1.08333	1.4		1.16667	2.16667
814	Female	Grade 4	9	No	4.25	2.82	3.17	2.73	3.45	2.75	3.25	4.88	3.5	1.84211	1.58333	1.4		1	1.16667
815	Female	Grade 4	9	No	2.67	3	4.25	3	3.45	2.5	2.67	4.13	3.7	2.57895	1.16667	1.8		1	1.33333
816	Female	Grade 4	8	No	2	3	2.25	3.91	4.09	1.75	2.17	3.38	5.2	3	1.33333	1.6		1	1.83333
817	Female	Grade 4	9	No	3.83	3.09	3.17	3.18	3.27	3.33	1.83	4.63	4.5		3	1.9	1.6	1.66667	2
818	Female	Grade 4	9	No										3.78947	1.33333	2.5		1.16667	2
819	Female	Grade 4	9	No	2.08	3.91	2.58	2.73	3	2.17	2.67	4.13	3.2	2.36842		2		1.16667	1.66667
820	Female	Grade 4	9	No	1.75	3.55	5	3.73	2.64	2.92	3.5	3.38	5	2.10526	1.5	1.9	1.4	2	2.16667
821	Male	Grade 4	9	No										1.63158	1.75	1.5		2	2.33333
822	Male	Grade 4	8	No	3.08	3.55	3.42	3.45	3.55	3.17	3.42	3.63	3.6	3.63158	1.75	3.2	3.8	1.5	3.33333
823	Male	Grade 4	9	No	2.75	3.45	2.92	3.45	1.91	2.58	3.17	2.5	1	2.89474	2.16667	2.3	1.8	2.66667	2.83333
824	Male	Grade 4	10	No										3.05263	2	2.5	3	2	2.66667
825	Male	Grade 4	9	No										2.94737	1	1.6	1.6	1	2.5
826	Male	Grade 4	9	No										3.21053	1.58333	1.7		1.33333	2.83333
827	Male	Grade 4	10	No	2.33	2.36	2.08	2.73	3.18	2.92	2.33	4.38	3.4
828	Male	Grade 4	9	No	3.58	3.18	2.5	2.82	3.55	2.42	2.67	4.63	4.8	2.52632	1.5	2.3	2.2	1.66667	2.16667
829	Male	Grade 4	9	No	3	3.36	3.25	3.09	4.09	3	3.58	4.13	2.9	2	2.25	1.6		2.16667	1.83333
830	Male	Grade 4	9	No	3.92	2.91	3.25	3.18	2.82	2.83	3.17	4	2.7	2.05263		1.6	1.4	1.33333	2
831	Male	Grade 4	9	No	2.92	3	3.42	2.64	1.73	2.58	3.42	4.63	3.3		2.08333			2.33333	2.66667
832	Male	Grade 4	9	No	3	3.18	3.42	3.45	3.09	3.33	3.42	3.13	3.3	2.63158	2.25
833	Male	Grade 4	9	No										2.15789	1.83333	2	1.6	2.33333
834	Male	Grade 4	9	No										3	1.16667	2.1	3.6	1.16667	2.66667
835	Male	Grade 4	9	No	2.75	3.82	4.25	2.82	4.18	3.08	2.5	4.5	5	2.26316	1.16667	1.3	3.2	1	2.16667
836	Male	Grade 4	9	No											1.16667	1.7		1	1.33333
837	Male	Grade 4	8	No	3.17	3.27	3.08	3.91	3	2.83	2.67	4.38	2.5	2.63158	2.08333	2.4	3.6	1.66667	2.16667
838	Male	Grade 4	9	No	2.92	3.36	3.83	3.55	2.64	2.42	2.92	2.5	3.6	2.63158	1.91667	2.3		1.66667	2.66667
839	Male	Grade 4	9	No											1.16667	1.5	2.6	2.16667	2.5
840	Male	Grade 4	9	No											1.66667	1.7		1.5	2.5
841	Male	Grade 4	9	No										2.78947	1.75	1.5	2	1	2.33333
842	Female	Grade 4	9	No	3.42	2.73	3.58	2.82	3.36	2.67	2.58	3.25	4.1	2.15789	1.5			1.66667	2.16667
843	Female	Grade 4	9	No	2.42	2.09	3.75	1.82	2.27	2.67	2.17	4.38	4.2	1.78947	3.66667	2.2	1.8	2.66667	3.16667
844	Female	Grade 4	9	No	1.67	2.73	2.58	1.55	2.64	1.67	1.83	5	4.4	2.84211	1.58333	1.7	3	1.33333	2.16667
845	Female	Grade 4	9	No	2.67	2.64	3.25	2.55	2.73	2.67	1.67	4	3.9	3.10526	1.41667	2.2		1.5	2
846	Female	Grade 4	9	No	3.58	4.36	2.42	2.91	3.82	3.92	3.42	4.75	4.5	3.15789	1.58333	1.9		1.16667	2.16667
847	Female	Grade 4	10	No	2.17	2.45	2.75	2.36	4	2.17	2.08	3.13	4.9
848	Female	Grade 4	8	No	3.58	3.27	4.17	2.55	2.45	3	2.58	3.13	3.7	2	1.33333	1.7	1.6	1.33333	2
849	Female	Grade 4	9	No	1.42	2.18	1.83	1.82	2.36	2.42	1.83	4.63	3.9	1.63158	1	1.3	1	1	1.16667
850	Female	Grade 4	8	No										2.84211	1.58333	1.4	3.2	2
851	Female	Grade 4	9	No	3.08	2.36	1.83	3.27	4.64	3	1.25	4.13	4	2.57895	1.5	1.6	3	1.66667	2.83333
852	Female	Grade 4	9	No	2.58	2.55	2.5	2.64	3.27	2.58	2.25	3.63	4.4	2.57895	1.58333	1.6		1.66667	2.16667
853	Female	Grade 4	9	No	3	3.64	2.83	2.73	4	3.58	3.58	4.5	4.5	1.21053	1.08333	1.1	1.4	2.16667	1.33333
854	Female	Grade 4	8	No	2.5	2.09	2.25	2.09	5	2.92	2.58	5.75	3.6	2.15789		1.7	2.4	1.33333	2.16667
855	Female	Grade 4	9	No	3.42	2.91	1.83	3.36	3.82	2.92	2.5	3.25	3	2.57895	1.16667	1.6		1.83333	1.83333
856	Female	Grade 4	9	No	2.5	2.91	3.25	2.73	3.82	2.58	2.17	4	4	1.26316	1	1.3		1	1
857	Female	Grade 4	9	No	2.33	2.64	3.75	2	3	2.33	2.33	4.5	4	2.26316	2.5	1.8	3	2.66667	3
858	Female	Grade 4	10	No	3.83	3.18	3.42	3.18	3.64	3.92	3.42	4.13	3.8	2.42105	1.58333	1.7	1.8
859	Female	Grade 4	8	No	3	3.73	2.92	2.73	3.09	3.25	2.25	4.5	3.9		1.25	1.8	1.8	1.66667
860	Female	Grade 4	9	No	2.83	3.45	3.25	2.73	4.27	2.42	3.58	4.5	3.9	1.78947	1.91667	1.8	1.8	2.83333	2.66667
861	Female	Grade 4	9	No											2.75	2.9		2.16667	3
862	Female	Grade 4	8	No	2.33	2.91	3.92	2.45	3.36	2.42	2.25	4.5	4.3	1.84211	1.25	1.7		1.33333	2.16667
863	Female	Grade 4	8	No	4.92	3.91	1.5	3.64	3.82	4.08	4.67	5.63	3.1	2.78947	1.16667	1.3		1.33333	1.66667
864	Female	Grade 4	9	No	2.58	2.27	3.25	3.27	2.45	3.33	2.75	4.75	4.3	3.42105	2	2.5		1.16667	3
865	Female	Grade 4	9	No	3.42	2.91	3.17	2.73	4.09	2.75	2.58	3.63	4.5	2	1	1.7	2.2	1.33333	1.83333
866	Female	Grade 4	9	No	2.42	2.09	2.42	2.09	4.36	2.42	2.83	5.38	3.8		2.83333	2.6	2.4	1.66667	2.83333
867	Female	Grade 4	8	No	3.5	3.73	3.17	3.36	3.18	4.33	3.5	3.88	3.3	3.42105	1	1.6	2.6	1	2.33333
868	Female	Grade 4	9	No										1.94737	2.08333	1.7	2.2	1.83333	1.66667
869	Female	Grade 4	9	No										2.63158	1.75	2	2.4	1.66667	2
870	Male	Grade 5	10	No	1.58	2.64	1.92	2.09	3	2.5	2.08	3.13	3.8	3.21053	1.16667	1.6		1	2.16667
871	Male	Grade 5	10	No	3.83	3.36	3.92	3.18	4.27	3.5	3.33	4.75	4.5	3.31579	1.25	1.8	3.2	1	2.5
872	Male	Grade 5	10	No	3	4.09	3.75	3.36	2.36	3.25	4	4.13	1.8	3.10526	1	1.6		1.33333	1.66667
873	Male	Grade 5	10	No	2.5	2.27	3.42	2.55	3.09	2.25	2	3.75	4.7	2.68421	1.08333	1.3		1.5	2.16667
874	Male	Grade 5	10	No	3.58	3.82	3.67	4.36	3.09	2.75	4.08	3	3.2	3.10526	1.75	1.9	2.6	1	2
875	Male	Grade 5	10	No	2.58	3.18	3.42	3	3.82	2.58	2.33	3.75	4.2	2.31579	2.83333	1.9		2.66667	3.33333
876	Male	Grade 5	10	No	3.83	3.36	2	2.36	3.55	2.17	2.83	4.63	4.5
877	Male	Grade 5	10	No	2.42	3.55	2.75	1.73	2.91	2.58	1.92	3.5	4.2	3.42105	1.66667			1.83333	2.33333
878	Male	Grade 5	10	No	3	3.36	2.5	2.73	3.73	2.75	2.67	5.75	3.6			2.7		2.16667
879	Male	Grade 5	10	No	2.42	2.73	2.92	3.55	3.27	3.67	2.58	4.75	4.4	2.42105	1	1.3		1.66667	1.66667
880	Male	Grade 5	10	No	3.08	3.36	3.58	3.18	4.09	3.42	3.33	4.88	4.4	2.73684	1.58333	1.9			2.33333
881	Male	Grade 5	10	No	4.17	3.55	1.75	2.64	4.18	1.67	3.5	4.75	4.2	2.05263	2.66667	2		2.66667	3
882	Male	Grade 5	10	No	2.75	3.09	3.42	3.91	2.55	3.58	3.75	3.25	2.1		1.08333	1.6		1.16667	2.66667
883	Male	Grade 5	10	No	2.92	4.18	3.58	3.09	4.73	3.25	3.75	3.75	5.1	2.89474	1.33333	1.9		1.83333	1.33333
884	Male	Grade 5	10	No	2.67	2.64	2.83	2.82	3.09	2.5	2.83	3.75	3.8	3		2.2		1	2.16667
885	Male	Grade 5	10	No	3.75	3.45	3.5	2.82	3.91	2.42	2.83	3.38	3.8	3.36842	1.08333			1.5	3
886	Male	Grade 5	10	No	3.42	2.73	3.58	3.27	3.18	3	3.08	3.63	3.1	2.78947	1.33333	1.8	2.8	1.5	2.83333
887	Male	Grade 5	10	No	3.33	3.45	3.08	3.27	4	2.92	2.92	4.13	3.5	2.89474	1	1.8			2
888	Male	Grade 5	11	No	3.25	2.82	4.33	3.09	3	3.42	3.5	3.25	2.9	2.63158	1.33333	3.1	3.2	1.5	3
889	Male	Grade 5	10	No										2.89474	1.66667	2.2	2.2	2.33333	3
890	Male	Grade 5	11	No	2.67	3.09	3.83	4	2.91	3.67	2.83	4.25	3.3	3.52632		2.5	2	1.16667	1.83333
891	Male	Grade 5	10	No	3.08	2.91	4	2.55	4	2.33	2.42	4.25	3.3	2.63158	1.16667	1.7		1.5	1.5
892	Male	Grade 5	10	No	2.83	3.09	2.17	3	3.27	3.83	3	4	3	2.47368	1.25	1.7	1.8	1.5	1.83333
893	Male	Grade 5	10	No	3.42	3.82	2.58	2.73	3.09	2.92	2.67	4.38	4.9	3.15789	1.41667	2.6		1.66667	2.5
894	Male	Grade 5	10	No	2.75	3.27	4.42	2.64	2.18	2.25	1.5	3.25	3	3	1.5	2.3		1.16667	2.33333
895	Male	Grade 5	10	No	2.5	3.45	3.92	3.45	2.64	2.92	3.33	2.5	2.7	3.05263	2.16667	2.4		1.66667	2.16667
896	Male	Grade 5	9	No	2.75	2.73	3	2.45	2.36	2.67	3	3.5	2.9	3.47368	1.58333	3.3		1.33333	3.16667
897	Female	Grade 5	9	No										2.89474	1.83333	2.3		2.16667	2.83333
898	Female	Grade 5	10	No	2.42	3.45	2.25	2.82	3.45	2.33	2.92	4.25	4
899	Female	Grade 5	9	No	3.08	2.36	4.58	3.36	3.18	2.83	2.08	4	4.4	1.84211	1	1.2	1.8	1	1.83333
900	Female	Grade 5	10	No	2.42	2.64	2.92	2.45	2.27	2.5	2.33	4	2.8	1.78947	1.16667	1.5	1.4	1.33333	2
901	Female	Grade 5	10	No	3.58	3.18	3.42	2	2.45	2.75	3.08	3	3.2	3.68421	1.41667	1.5		1.5	1.83333
902	Female	Grade 5	10	No	3.25	3.27	3.25	2.36	2.82	2.42	2.58	3.75	4	3.68421	1	1.5	1	1	1.33333
903	Female	Grade 5	10	No	2.92	2.64	3	3.55	2.45	2.08	3.17	4.13	2.1	2.21053	1.5	1.5	2.6	1.5	2.16667
904	Female	Grade 5	10	No	3	3.91	3.67	3	3.18	3.08	3.25	4	3.5			1.6		1	1.5
905	Female	Grade 5	10	No	2.42	3	3.33	2.55	3.18	2.83	2.5	4.38	3.3	2.94737		1.9	1.6	1.5	2.33333
906	Female	Grade 5	9	No	1.75	2.64	4.33	2.91	3.36	2.75	2.58	4.38	4.4	2	1.58333		2.8	1.83333	2.5
907	Female	Grade 5	9	No	1.75	2	2.58	1.73	1.91	2.33	2.58	3.13	4.2	3.31579	1	2		1	1.66667
908	Female	Grade 5	10	No	2.25	3	4	2.09	3.82	2.67	3.58	4	3.6	2.73684	1	1.8		1	1.83333
909	Female	Grade 5	10	No	3.17	3.36	4.17	3	2.45	3.5	2.75	4.63	3.3	2.05263	1.41667	1.7	1	1.33333
910	Female	Grade 5	10	No	2.92	2.36	3.25	2.36	2.09	2.33	2.83	5.13	3.4	3	1.16667	1.6		1	1.33333
911	Female	Grade 5	10	No	2.17	2.09	2.75	1.82	2.91	2.17	2.17	3.88	3.4	3.36842	1	2		1.33333	2.16667
912	Female	Grade 5	10	No	2.17	2.45	3	2.64	2.27	2.58	2.25	4.25	4				1.8	1	2
913	Female	Grade 5	10	No	2.75	3.27	2.5	2.36	2.73	1.92	2.67	3.5	2.9	2	1.33333	2		1.33333	2.16667
914	Female	Grade 5	10	No	2.5	2.55	3.17	1.73	1.82	2.17	1.75	3.13	3	2.63158	1.16667	1.9	2	1.33333	1.5
915	Female	Grade 5	11	No	1.92	2.45	2.42	1.18	1.27	1.5	1.08	4.75	3	1.78947	1.66667	2.1	1.6	2	2.33333
916	Female	Grade 5	10	No	3.17	2.73	3.67	2.82	3.27	2.5	2.83	3	3.4		1	1.6	3	1	2.83333
917	Female	Grade 5	10	No	1.92	2.27	3.08	2.64	1.73	2.75	2	3.38	3.8	3.36842	1	2	4	1	1.66667
918	Female	Grade 5	10	No										2.31579		1.5	2	1.33333	2.33333
919	Female	Grade 5	10	No	2.08	2.64	2.33	1.91	2.73	2.08	1.92	4.38	3.4	3.52632	1	2.8	1	1	2.5
920	Female	Grade 5	10	No	3.5	3.82	5	2.55	2.91	3.17	3.58	4	4.5	3.42105	1.16667	1.9		1	1.66667
921	Male	Grade 5	9	No	3.17	3.64	3.33	2.45	4.18	3.33	2.5	3.86	3.2	1.63158	2	1.7	1.4	1.5	2.5
922	Male	Grade 5	10	No	3.33	3.18	3.67	3.18	3.64	3.08	3.25	4	4		1.66667	1.5	2.8	1	1.83333
923	Male	Grade 5	9	No											1.5	2.5		1.66667	2.5
924	Male	Grade 5	9	No	1.67	2.55	3.67	3.09	2.27	2.33	2.25	4	2.6	2.26316	2	2.5		2
925	Male	Grade 5	11	No	1.75	2.82	3.5	3	2	2.33	2.75	4	2.2	1.47368	1.25	1.4		1.5	1
926	Male	Grade 5	10	No	3.58	3.45	4.08	2.82	4.09	3.42	3.58	3.75	4.8		1.75	1.5	2	1.16667	1.83333
927	Male	Grade 5	10	No	2.92	3.36	4.33	3	4	3.25	3.25	3.75	4	3.21053		1.9		1	2.5
928	Male	Grade 5	10	No	2.75	3.27	2.83	2.09	3.45	3.25	2.83	4.75	3.7	2.42105	3.83333	2.8		3.16667	3.16667
929	Male	Grade 5	10	No	1.83	2.73	3.08	2.45	2.91	2.25	2.25	4.5	3.8	3.21053	1.25	2	2.6	1.33333	1.66667
930	Male	Grade 5	10	No	2.33	2.36	3.25	1.36	3.27	2.58	1.75	3.13	3.8	2.94737	1.25	2.1	1.2	1.66667	2.66667
931	Male	Grade 5	10	No	3.58	3.73	3.25	3.55	3.73	4.17	3.58	3.88	2.3	1.78947	1.58333	1.7	2.2	1.83333	1.83333
932	Male	Grade 5	10	No	3	2.91	3.42	3.36	3	2.67	2.92	3	2.9	1.68421		2		1.33333	1.33333
933	Male	Grade 5	10	No	3	3.09	2.92	3.27	2.82	2.92	2.42	3.38	2.4	2.68421	2	2.2	1.2	2	2.66667
934	Male	Grade 5	10	No	3.17	3.45	3.33	2	2.09	2.92	2.67	3.38	3		1.08333	1.6		1.16667	1.83333
935	Male	Grade 5	11	No	2.17	4.18	2.67	2.27	2.64	2.92	2.33	3.38	3.4	2.63158	1.41667	1.9	1	1.5	2.33333
936	Male	Grade 5	9	No	4.08	3.09	3.25	3.73	3.73	2.58	3	4.5	3	2.15789	2.25	2.7	2.4	3	3.16667
937	Male	Grade 5	11	No	3.17	3.18	2.92	3	3.45	2.67	2.83	3.88	2.3		1.5	2.3		1.16667	1.66667
938	Male	Grade 5	10	No	3.67	3.64	3.33	3.36	4	4	3.33	2.88	3.7		2.08333	2	1	2
939	Male	Grade 5	10	No	3.75	3.45	2.33	2.64	3.36	3.58	2.83	3.63	3.6	2.63158	2.16667	1.9		2.16667	2.16667
940	Male	Grade 5	10	No	3.75	3	3.5	2.73	4	3.83	2.83	4.13	3.5		2.25	2.1	1.6		1.66667
941	Male	Grade 5	10	No	2.92	3	3.25	2.55	3.45	2.92	3	4.25	3.7	1.94737	2.16667	1.9		1.83333	3
942	Male	Grade 5	10	No	3	2.82	5.25	3.18	3.91	3.5	3.5	4.75	4.2	2.84211	1.58333	2.2		1.5	2.83333
943	Male	Grade 5	11	No	1.67	1.91	2.25	1.27	2.18	1.67	1.5	3.88	3.3	2.52632	1.08333	1.5	2.4	1.16667	2
944	Male	Grade 5	10	No	4.25	3.45	2	2.64	4.09	3.17	3.58	4.5	3.9		1.33333	2		1.33333	2.66667
945	Male	Grade 5	10	No	3.42	3.36	3.25	2.64	3.09	3.08	2.83	4.75	4.1	2.42105		1.5		1.33333	1.5
946	Male	Grade 5	10	No											1.16667	1.7		1.83333	1.16667
947	Male	Grade 5	9	No	3.33	3.27	4.33	2.82	3.91	3.42	2.75	4.75	4.7	2.73684	1	1.4		1.16667	2.16667
948	Female	Grade 5	10	No	3.5	3.55	3.42	2.91	4.27	3.25	3.92	4.38	4.8	2.78947	1.41667	1.7		1.16667	1.66667
949	Female	Grade 5	9	No	3.58	3.36	3.83	2.09	3.73	2.25	3.42	4.75	4.9	2.94737	1.25	2.4		1.83333
950	Female	Grade 5	11	No	2	2.36	3.33	3.18	2	2.25	1.83	3.5	3.5	3.05263	1.16667		2.2	1.33333	2
951	Female	Grade 5	10	No	1.75	1.82	2.25	1.82	1.91	1.75	1	4.25	3.7	3.36842	1.08333	2.1		1.5	2.5
952	Female	Grade 5	10	No	3.58	2.36	2.58	2.36	3.82	2.5	2.5	4.5	4.3	2.78947	1.16667	1.4	1.4	1	1.33333
953	Female	Grade 5	10	No	2.5	3.09	4.08	3.27	2.64	3	3.25	3.75	3	3	1.25	1.6	1.6	1.5	2
954	Female	Grade 5	9	No	3.25	2.73	3.5	2.73	4.45	2.67	3	3.75	4.3		1.33333	1.8		2	1.66667
955	Female	Grade 5	10	No	3.08	3.55	3.5	3.27	2.45	3.58	2.75	3	3.5	1.63158	1.5	1.5	1.2	1	1.66667
956	Female	Grade 5	10	No	2.83	3.91	3.75	2.73	3.64	2.08	2.08	4.63	4	3.47368	1.16667	1.8		1.33333	2
957	Female	Grade 5	10	No	2.25	3	2.58	3.09	3.91	2.17	1.92	4.25	4.3	1.42105	2.75	1.5	1	3	2.33333
958	Female	Grade 5	10	No												1.3	1.8	1.16667
959	Female	Grade 5	10	No										2.31579	1	1.4	2	1.33333	2
960	Female	Grade 5	10	No	2.33	2.45	3.25	3.18	2.91	2.75	2.25	4.38	3.3		1.25	1.9		2.5	2.16667
961	Female	Grade 5	10	No	2.08	2.82	3.42	2.09	1.73	3.17	1.58	3.63	2.8	2.84211	1	2.1	2	1	1.66667
962	Female	Grade 5	10	No	2.17	3.27	2	2.64	3.45	3.33	2.08	3.88	5	2.89474	1.33333	1.8		1.33333	1.83333
963	Female	Grade 5	9	No	4.17	3.73	2.67	2.55	3.64	2.75	3.08	4.38	4.5	2.73684	1.08333	1.7		1.33333	1.83333
964	Female	Grade 5	11	No	3.33	2.82	4.08	2.09	2.91	2.58	2.42	3.75	4.3	3.21053	1.08333	1.6	2.8	1.16667	1.5
965	Female	Grade 5	10	No	3.25	3.36	3.25	2	2.45	2.75	2.42	4.5	3.7		1.08333		2.6	1.16667	1.33333
966	Female	Grade 5	10	No	3.67	3.82	2.75	3.36	4.73	1.58	3.33	3	4.3		1.16667	1.8	1.8	1.83333	2.16667
967	Female	Grade 5	10	No	2.25	2.45	3.42	2.36	2.27	2.25	1.58	3.75	3.6	2.84211	1.08333	1.3		1	1.66667
968	Female	Grade 5	11	No	3.17	3.55	3.25	2.73	3.18	2.75	2.5	4.25	3.7	2.21053	1.91667		1		2.33333
969	Female	Grade 5	10	No	2.08	2.27	2.58	2.36	3.64	2.42	2.08	3.25	3.8	2.84211	1.25	1.7		1.33333	1.66667
970	Female	Grade 5	10	No	2.5	2.27	2.83	2.09	3.27	2.25	1.83	4	5	3.05263	1.08333	1.6	1.2	1	1.16667
971	Female	Grade 5	10	No	2	2.82	4.17	3.45	3	3.75	2.17	4.88	5.1	2.73684	2.75	2.5		3.33333	3
972	Female	Grade 5	10	No	3.08	2.82	3.92	3.55	4.36	3.25	2.75	4.13	4.4		2	1.6	1.4	1.83333	2
973	Female	Grade 5	9	No	4.17	3.45	4	3	3.27	3.42	3.42	3.25	4.4	2.21053	2.75	2.1		2.66667	2.16667
974	Male	Grade 5	9	No	4	4.09	3.42	3.18	4.09	3.42	3.75	3.25	3.7	2.05263	1.75	1.6		1.66667	1.5
975	Male	Grade 5	10	No										2.36842	1.33333	1.8	1.8	1.5	1.83333
976	Male	Grade 5	10	No	3.08	3.18	4	2.91	2.45	3.25	3	3.38	3.6	1.73684	1.5	1.2	2	1.33333	1.33333
977	Male	Grade 5	10	No	2.83	3.73	4.42	3.55	4.27	3.42	4.08	5	4.7	2.10526	2.25	1.7	2	2	2.5
978	Male	Grade 5	10	No	2.25	2.91	3.08	2.36	3.27	2.67	2.58	3.75	3.8	1.94737	1.41667			1.33333	1.16667
979	Male	Grade 5	10	No	3.75	3.45	3.33	3.27	2.36	3	3.33	4.25	4.8
980	Male	Grade 5	10	No	3.58	2.82	4.83	2.91	3.55	3.08	2.75	4.25	4.7	2.10526	1.16667	1.6	1.6	1.5	1.5
981	Male	Grade 5	10	No	3.17	3.18	3.33	3.73	2.82	3.67	3.25	3.5	2.4		1.33333	1.2	1.8	1.33333	1.83333
982	Male	Grade 5	12	No	2.92	2.27	2	2.27	3.09	1.92	2.08	4.25	2.9	2.78947	1.83333	2.2	2.8	1.16667	2.83333
983	Male	Grade 5	10	No	3.08	3.18	3.33	2.64	2.45	2.67	2.83	3	2.9		1.25	2.4	2.4	1	2
984	Male	Grade 5	10	No	1.83	1.55	2.58	3.45	1.82	2.08	1.67	4.25	2.2	3.31579	1.16667	2.1		1	2.16667
985	Male	Grade 5	10	No	2.67	2.55	3.17	3.36	3	3.83	2.5	4.63	3.6	1.94737	4	2.5	1	3.5	2.5
986	Male	Grade 5	10	No	2.33	2.55	2.92	2.55	2.27	2.08	2.33	3.13	3.4	1.73684		1.6	1.4	1	1.33333
987	Male	Grade 5	11	No										1.52632	3.83333	2.7	1	2.83333	3
988	Male	Grade 5	11	No	3.33	3	3.25	2.91	3.36	3.17	3.08	4	3	3.26316	1.58333	2.3	1.8	1.5	2.33333
989	Male	Grade 5	10	No	2.67	3.09	4	1.82	3.82	1.58	1.08	4.25	4.7			1.2	2.2	1.5	1.16667
990	Male	Grade 5	10	No	3.5	3.64	2.67	2.27	2.64	2.58	2.5	4.13	2.5			2.8		1.33333	1.83333
991	Male	Grade 5	10	No	2.08	2.91	3.42	3	3.55	2.42	3	4.25	4.4	2.63158		2.5		2.16667	2.33333
992	Male	Grade 5	10	No	2.83	4	3.5	3.55	1.91	3.5	3.92	3.63	3.1	2.36842		2.6	1	1.83333	2.83333
993	Male	Grade 5	9	No	2.25	2.64	2.25	2.27	1.64	2.17	1.67	3.25	2.7	1.89474			1.6	1.83333	1.83333
994	Male	Grade 5	10	No	1.58	2.73	4.92	2.09	2.36	2.17	1.83	3.63	3.9	2.84211	1.25	1.5	2	1.33333	2.16667
995	Male	Grade 5	10	No	3.17	3.55	3.25	4	2.27	4	3	2.5	2.3	2.73684	1.41667	2		1.33333	1.5
996	Male	Grade 5	10	No	2	2.36	3.17	1.45	3.27	1.5	1.5	4.13	4.7	2.63158	1.41667	1.2	1.2	1	1.66667
997	Male	Grade 5	10	No	3.08	2.91	3.92	2.45	3.27	3.58	2.25	3.63	3	3.42105	1.25	2.3	3.4	1.5	2.33333
998	Male	Grade 5	9	No	1.58	1.55	1.5	2.64	1.27	1.58	1	3.88	2.4	3	2	1.9	3.4	1.66667	2.5
999	Male	Grade 5	10	No	4.25	3.45	4.17	4	3.27	3.08	4	4.5	3.3	2.78947	1.08333	1.6		1.16667	1.5
1000	Male	Grade 5	9	No	3.58	3.64	3.42	2.73	3.82	2.83	3.08	5	3.3		1.58333	1.7	1.2	1.16667	1.83333
1001	Male	Grade 5	10	No	3.08	3	3.92	1.45	1.73	3	2.92	4.13	4.4	2.84211	1.16667	1.8	2.6	1.16667	2.16667
1002	Male	Grade 5	10	No										2.31579	1.83333	1.9	1.6		2.16667
1003	Male	Grade 5	10	No	3.25	3	3.42	2.36	3.09	2.83	3	4.25	3.6	2.26316	1.33333	2		1.16667	2
1004	Male	Grade 5	10	No	2.75	2.82	3.58	3.45	1.82	2.67	3	3.63	2.1	2.31579	1.5	1.8	2	1.33333	1.5
1005	Female	Grade 5	10	No	3	3.55	4.25	3.09	3.36	2.92	3.67	4.38	3.7	2	1.66667	2.4		2.16667	2.5
1006	Female	Grade 5	10	No	2	2.45	3	2.82	2.82	3	2.08	3.5	4	1	1	1		1	1
1007	Female	Grade 5	10	No	3.58	3.27	2.5	2.82	3.27	3	3.17	4.13	4.4	3.57895		1.8		1.66667	2.83333
1008	Female	Grade 5	11	No	1.42	1.82	3.17	1.18	1.55	1.83	1.33	5.13	3.6	3.10526	1	1.5	2.2	1	1.66667
1009	Female	Grade 5	10	No	2.25	2.64	2.25	2.27	1.64	2.17	1.67	3.25	2.7	2.89474		2	2.4	1.16667	2.66667
1010	Female	Grade 5	10	No	3.17	3.45	3.08	2.82	4.73	2.83	1.67	4.25	4.5	2.94737	1.25	1.6	3.2	1.16667	2.16667
1011	Female	Grade 5	10	No	2	2.27	3.75	3	2.18	3	2.25	3.13	2.5		1.16667	1.5		1.5	2
1012	Female	Grade 5	10	No	3.25	3.64	3.75	3	3.45	3.83	3.5	2.88	3.3	2.36842	1	1.5	1.8	1.33333	2
1013	Female	Grade 5	10	No	3	3.18	3.5	3.73	1.91	3.25	2.83	3.75	4.7		1.5	2.3	2.6	1.66667	2.33333
1014	Female	Grade 5	10	No	2.5	2.64	3.08	2.73	2.18	2.33	2.08	3.75	3	2.21053	1.25	1.7		1.66667	2
1015	Female	Grade 5	11	No	3.67	2.82	3.42	3.36	3.18	3.17	2.92	3.88	3.5	2.26316	2.08333		2.2	1.66667	2.33333
1016	Female	Grade 5	9	No	2.25	2.36	2.58	3.09	3.18	2.33	2.33	2.63	3.9		1.25	1.5	1.6	1.5	1.66667
1017	Female	Grade 5	9	No										2.10526		1.5	2	1.33333	2
1018	Female	Grade 5	10	No	3.17	3.45	4.25	2.82	3.82	3.25	2.83	4.38	4.4	2.52632	1	1.5	1.8	1.16667	1.33333
1019	Female	Grade 5	10	No	2.08	2.91	3.83	2.55	3.27	2.42	2.08	4.63	4.1	2	1.41667	1.9	1.8	1.5	1.66667
1020	Female	Grade 5	10	No	3.08	2.55	3.67	2.55	3.18	3.33	4.17	3.5	3.9	2.84211			1	1	1.83333
1021	Female	Grade 5	10	No	2.75	2.73	4.08	2.82	3.18	2.58	2.33	4.38	4	2.89474	1.25	1.5	1.4	1	1.5
1022	Female	Grade 5	10	No	1.58	3.36	2.75	1.64	1.64	1.83	1.58	5.25	3.9	2.63158	1.41667	1.9	2	1.33333	1.83333
1023	Female	Grade 5	10	No	2.25	2.45	3.25	2.09	1.82	2.83	1.67	3.88	3.1	1.94737	1.16667	1.7		1.33333	2
1024	Female	Grade 5	10	No	2.25	2.36	2.25	2.45	2.73	2.67	1.58	4	4.2	1.94737	1.58333		2.8	1.5	1.5
1025	Female	Grade 5	10	No	3	2.82	3.33	3.18	2.36	3.08	3.17	4	3.3		1.25	2		1.16667	1.66667
1026	Female	Grade 5	10	No	2.08	1.91	2.83	1.45	1.36	2.08	1.5	3.38	3.3	2.36842	1.91667	2.1		1.66667	2.16667
1027	Male	Grade 4	11	No	3.83	4.27	3.25	3.55	3.64	3.92	3.08	4.13	2.8	3.10526	1.58333	2.1		1.33333	1.66667
1028	Male	Grade 4	8	No	3.5	3.73	3.83	3.55	3.45	3.17	3.92	4.25	3.8	3	1.25	1.8	2.6	1.33333	2.33333
1029	Male	Grade 4	9	No	2.5	3	5.58	2.73	2.64	3.58	3.42	4.13	3.6	1.89474	2.08333	1.9	2.2	2.66667	2.83333
1030	Male	Grade 4	9	No	3	2.91	4.33	2.82	3.55	2.75	2.67	4.38	3.6	1.52632	1.08333	1.5	1.4	1	1
1031	Male	Grade 4	8	No	1.5	2.18	3.5	1.91	2.27	3.17	1.75	3.75	3.2	2.31579	1.58333		2.4	1.5	1.66667
1032	Male	Grade 4	10	No	3.58	3.27	3.42	3.91	4.27	3.33	4.67	5.25	3.3	2.36842	1.33333	1.9	2	1.33333	1.5
1033	Male	Grade 4	10	No	2	3	3.5	3.18	2.36	3	2.42	4.5	3.6	3	2.25	2.5	2.8	1	2.5
1034	Male	Grade 4	9	No	2.25	2.45	4.08	2.45	1.91	3.5	1.83	2.63	1.4	2.15789	1.58333	1.3	2.4	1.16667	1.5
1035	Male	Grade 4	10	No	2.83	3.36	3.5	2.91	3.82	2.42	2.75	4.75	4.6	2.36842	2.75		2	1.83333	2.5
1036	Male	Grade 4	9	No	3.33	3.82	3.42	3.09	3.09	3	3.58	3.13	2.5		1.25	1.8	1.6	1.5	1.66667
1037	Male	Grade 4	9	No	3	3.36	3.08	3	3.55	3.58	3.75	3.75	2.1	2.68421	1.83333	1.9	2.2	1.66667	2.16667
1038	Male	Grade 4	10	No	3.08	3.09	3.42	2.45	2.36	2.58	2.42	4.13	3.1	2.57895	1.5	2.8	2.8	1.5
1039	Male	Grade 4	9	No	3.25	3.45	3.25	3.27	4.45	3.25	3.25	3.63	4.2	2.42105	1.33333	1.7	2.8	1.66667	2.33333
1040	Male	Grade 4	9	No	3.83	3.64	4.08	3.73	3.45	3.08	3.83	3.5	3.9	1.26316			1.8	1.83333	1.5
1041	Male	Grade 4	11	No	3.08	3.36	2.83	3.27	2.64	2.92	3.08	4	2.7	2.26316	2.66667	2	2.2	2.5	2.5
1042	Male	Grade 4	9	No	3.67	3.82	5.25	3.82	5	4	4.33	3.25	4	1.89474	1.66667	1.8	1.2	1.66667	2.5
1043	Male	Grade 4	9	No	1.75	3.36	3.67	3.27	2	1.92	2.5	3.25	2.6	2.57895	1	1.7		1.66667	2.16667
1044	Male	Grade 4	9	No	3.25	3.55	3.25	3.91	3.09	3.33	3.08	3	3	1.68421	1.83333	2	2	1.33333	2.33333
1045	Female	Grade 4	9	No	2.17	2.91	4.17	2.18	3.64	2.42	2.08	4.13	5	2	1.33333	1.5	1.6	1.66667	1.33333
1046	Female	Grade 4	9	No	2.75	2.27	3	2.91	3.36	2.42	2	2.75	4.2	2.89474	1.33333	2.6	1.8	1.5	2.83333
1047	Female	Grade 4	10	No	3.67	3.27	3.33	4.18	2.45	3.33	3	3	2.3	2.26316		1.5	2.2	1.5	2.5
1048	Female	Grade 4	9	No	3.5	3	4	3.18	3.27	3.25	2.25	4.25	4.8	2.36842	1.33333	1.6	2.6	1	1.5
1049	Female	Grade 4	8	No	2.67	3.45	3.5	3.09	4.18	2.5	2.92	3.5	3.7	3.26316	1.08333	2.3	1.6	1.83333	3.16667
1050	Female	Grade 4	10	No	2.42	2.55	3.92	3.27	3.55	3.17	3.83	4.25	2.3		1.33333	1.3		1	2.5
1051	Female	Grade 4	8	No	3.17	3.73	3.25	3.36	3.82	3.75	3	3.63	4.2	2.31579	1.25	1.9	1.8	1.16667	1.66667
1052	Female	Grade 4	9	No	3.25	2.91	2.25	2.45	4	3	2.92	4.88	5		1.33333	1.3	2.2	1.16667	2.16667
1053	Female	Grade 4	9	No	2.83	2.73	3.25	2.73	3.64	2.92	2.67	4.13	4.6	3.31579	1.08333	1.4	2.6		1.83333
1054	Female	Grade 4	8	No	2.75	2.91	2.58	3.36	2.64	2.42	2.25	4.63	2.3	2.10526	1.5	1.7	2	1.66667	1.66667
1055	Female	Grade 4	9	No	2.58	3.45	3.75	3.27	2.27	3.33	2.58	3	2.4		1.33333		1.6		2.66667
1056	Female	Grade 4	8	No	2.75	4	3.92	2.91	3.18	3.08	3.92	4	3.8	2.78947	2.66667	2.7	3.2	2.5	2.66667
1057	Female	Grade 4	10	No	3	2.18	4.58	2.64	3.36	2.25	2.33	4.63	3.6	3.05263	1.16667	1.3	1.6	1.16667	2.5
1058	Female	Grade 4	9	No	3.17	2.73	3.67	2.73	3.09	2.75	2.17	4.75	3.4	1.94737		1.4		1.66667	1.5
1059	Female	Grade 4	8	No	3.42	3.18	3.75	3.09	3.73	2.83	2.75	4.75	3.3	2.89474		1.6		1.83333	2.33333
1060	Female	Grade 4	9	No	2.75	3.55	3.92	2.64	2.45	3.17	3.58	3	3.1	3.47368	1.08333	1.6		1	2
1061	Female	Grade 4	10	No	2.83	3.45	3.08	3.27	2.55	3.33	4.33	3.25	3.3	2.42105	2.83333	2.8	2.2	1.66667	2.83333
1062	Female	Grade 4	9	No	2.58	3.36	4.33	3.18	2.18	3	2.25	5	2.5	2.21053	1	1.6	2.6	1.33333	2.5
1063	Female	Grade 4	9	No	2.08	3.55	3.5	4.36	2.73	3.08	2.75	2.5	2.2	2.21053	1.08333	1.3		1.16667	2.16667
1064	Female	Grade 4	9	No	1.42	2.64	4.33	1.73	2.18	2	2.08	4.38	3.8	2.57895	2.91667	2.3	2.8	2.16667	2.5
1065	Female	Grade 4	8	No	3.33	2.82	3.67	2.18	3.64	2.67	3.08	4.75	3.1	2.21053	2.66667	2.2	2.6	2	1.83333
1066	Female	Grade 4	9	No	2.67	2.18	3.5	2.36	3.09	2.92	1.92	3.5	3.7	2.26316	1	2.3	1.8	1	2.16667
1067	Female	Grade 4	9	No	2.83	3.45	2.67	3.45	2.91	2.33	3.25	3	2	2.05263	1.08333	1.5	2.2	1	1.5
1068	Female	Grade 4	9	No	2.17	3.09	3.08	3.18	2.91	2.83	2.58	3.63	2.5	1.78947	1.75	1.7	1.6	1.83333	1.83333
1069	Female	Grade 4	9	No	2.83	3.09	4	3.36	3.55	2.67	3.25	4.25	4	2.47368	2.5	2.8	2.4	2.33333	1.83333
1070	Male	Grade 4	9	No	3.33	3.91	3.58	4.36	2.64	3.25	3.75	2.5	2.1	2.63158	2.41667	2.5	2.4	3.66667	3.5
1071	Male	Grade 4	10	No	3.83	3.45	3.25	3.55	3.27	3.33	3.92	4	4.3	2.73684	1.16667	2.7	2.6	1.5	2.33333
1072	Male	Grade 4	9	No	3.08	3.18	3.92	3.64	3	3.33	3.33	4.38	3.4	2.68421	1.5	2.2	2	1.33333
1073	Male	Grade 4	10	No	3.5	3.36	3.5	3.18	3.82	3.5	3.5	3.13	3		2	2.4	2.4	2.16667	2.33333
1074	Male	Grade 4	9	No	3.5	3.45	3.83	3.09	4.09	3.83	4.25	5	4.3	2.89474	1.75	2.2	2.6	1.5	3
1075	Male	Grade 4	10	No	2.5	2.64	3.25	2.91	2.18	2.92	2.33	3	3.1	2.78947	1.33333	2.2	1.6	2	2.16667
1076	Male	Grade 4	10	No	3.08	3.45	3.42	3.91	3.36	3.92	3.83	3	3.1	2.36842	1.58333	2	2.2	1.83333	2.16667
1077	Male	Grade 4	10	No	2.17	2.91	2.67	2.18	2.27	2.42	3.33	4	3.7		1.5	1.7		1.83333	2.66667
1078	Male	Grade 4	9	No	3.25	2.64	3.5	3.45	3	3.08	3.67	3.75	2.4	2.47368	2	1.7	2.6	1.5	1.66667
1079	Male	Grade 4	9	No	2.75	3.82	3.25	3.09	2	2.5	2.5	3	2.8	3.10526	2	2.4	2.8	1.5	2
1080	Male	Grade 4	9	No	2.92	3.09	3.83	3.27	3	3.92	3.17	3.63	3.1	2.57895	2.5	2.8	1.6	4	3.5
1081	Male	Grade 4	9	No	4.42	3.45	3.5	3.64	2.27	4.08	3.92	4.13	2
1082	Male	Grade 4	9	No	2.58	3.82	3	3.45	2.55	2.67	2.42	4	3.1		1	1.5	2.2	1	1.83333
1083	Male	Grade 4	10	No	4.17	2.73	3.33	3.09	3.45	3.33	3.33	3.5	4	2.26316	1.91667	1.4		1.5	2
1084	Male	Grade 4	10	No	3.33	2.91	2.67	2.91	3.73	2.83	2.5	3.38	3	2.84211	1.16667	1.9	1.6	1.16667	2.33333
1085	Male	Grade 4	9	No	3.92	2.91	3.25	3.36	2.82	4	3.25	3.88	2.5	2.31579	2	2.5	2.8	1.66667	2.5
1086	Male	Grade 4	9	No	2.58	3.09	3.25	2.73	2.91	2.67	3.25	3.38	3.2	1.73684	1.58333	1.7	1.4	1	2
1087	Female	Grade 4	9	No	2.92	2.82	3.33	3.18	3.18	2.58	2	4.75	3.5	2.63158	1.41667	2.1	1.2	1	2.16667
1088	Female	Grade 4	9	No	3.08	2.36	2.92	2.82	3.45	2.58	3	3.13	4.5	1.57895	1.33333	1.8		1	1.83333
1089	Female	Grade 4	8	No	3.58	3.73	3.58	2.64	3.18	3	3.42	3.63	3.9	1.89474	1.16667	1.6	1.4	1	1.83333
1090	Female	Grade 4	9	No	1.67	2.91	3.75	2.73	2.55	2.92	2	3.63	2.5	2.47368	1.83333	1.6	2	1.66667	1.66667
1091	Female	Grade 4	10	No
1092	Female	Grade 4	8	No	2.5	3.27	3.5	3.36	3.73	2.75	2.92	4.5	3.3	2		1.3	2	1	1.66667
1093	Female	Grade 4	9	No	3.5	3.64	3.67	2.91	4	2.83	3.17	3.88	3.4	3.05263	1.25	1.7	3	1.66667	1.5
1094	Female	Grade 4	10	No										2.10526	2.08333	1.8	2.4	2	2.5
1095	Female	Grade 4	10	No	1.92	3.64	4.42	3.45	2.82	2.83	2.92	4.38	4	2.73684	1.16667	2.6		1.5	2.33333
1096	Female	Grade 4	9	No	3.42	3.36	3.83	3.45	3.64	3.58	3.25	4.25	2.9	2.63158	2.41667	2	3.2	2.5	3
1097	Female	Grade 4	9	No	2.5	3.18	4.67	3.45	3	3.83	2.33	4.5	3.7	1.94737	1.08333	1.6	1.6	1.16667	1.66667
1098	Female	Grade 4	8	No	3.08	2.55	3.92	1.82	1.64	1.67	2.17	4.38	4.2	3.36842	1.08333	2.3	1.6	1.16667	2.66667
1099	Female	Grade 4	10	No	2.58	2.73	2.08	1.91	1.36	1.83	2.08	3.63	2.1
1100	Female	Grade 4	9	No	2.92	3.91	3.58	2.64	3.18	3	3.58	3.75	3.6	2.63158	1.91667	1.7	3	1.66667	3
1101	Female	Grade 4	9	No	2.75	3.55	3.92	3	3.09	3.42	3.08	3.38	4.6			1.7	1.8	1.5	2.16667
1102	Female	Grade 4	10	No	3.08	2.82	4.25	2.91	3.91	3.33	2.67	4.5	4.2	3	1.66667		2.6	1.83333	1.66667
1103	Female	Grade 4	11	No	3.17	3	3.25	3.55	3.73	3.58	3.33	3.63	4			1.5	1.4	2	1.5
1104	Female	Grade 4	9	No	2.42	2.73	3.25	2.27	1.91	2.08	1.42	4.38	4.5	2.63158	1.16667	2	1.8	1	2.16667
1105	Female	Grade 4	9	No	1.75	2.64	4.42	3.73	1.82	3	3.17	4.38	1.9	2.84211	1.08333	1.6	2.2	1	2
1106	Female	Grade 4	9	No	2.83	2.18	3.92	1.64	2	2.67	1.92	4.13	2.9	2.84211	1.25	2.2	1.6	1.16667	2
1107	Female	Grade 4	9	No	3.58	3.64	3.25	3.36	3.36	3.92	3.17	3.63	3	2.31579	1.91667	2.2	2	2.16667	2
1108	Female	Grade 4	9	No	2.75	2.82	3.58	3.64	2.82	3.58	3.58	2.5	3.1	2.73684		1.9	2.4	1	2.16667
1109	Male	Grade 5	12	No	4.17	2.82	3.42	2.45	3.55	2	2.5	5.25	3.4	2.21053	1.41667	2.3	1.4	1.83333	2.16667
1110	Male	Grade 5	10	No	3	3.27	3.42	2.73	3	3	3.83	4.38	2.6	2.26316	1.41667	1.3	1.6	1.33333	1.83333
1111	Male	Grade 5	9	No	3	3	3.5	2.36	3.36	1.92	1.75	4.38	4		1.16667	1.8	2	1.5	3
1112	Male	Grade 5	11	No	3.08	3.27	4.5	4	4.55	3.92	3.58	3.38	4.1	2.68421	1.91667	2.1	2.4	1.83333	3.5
1113	Male	Grade 5	11	No	4.58	3.91	3.5	2.82	3.27	2.83	3.83	4.88	3.2	2.52632	2.25	2.8		2.66667	3.83333
1114	Male	Grade 5	11	No	2.25	2.55	3.5	2.82	3.27	3.08	2.17	4.5	4	2	1.58333	1.6	1	1.83333	2.16667
1115	Male	Grade 5	11	No	3.17	2.55	4.83	2.55	2.55	3.33	2.5	4.38	3.1	2.57895	1.91667	2.2	2	1.66667	2.66667
1116	Male	Grade 5	10	No	3.42	3.27	3.42	4.18	2.91	3	3.08	4	3.4	2.78947	1.25	1.7	2.2	1	1.83333
1117	Male	Grade 5	11	No	2.67	3.18	3.75	2.55	3.55	3.58	2.75	3.38	3.9	2.21053	2.41667	2.1		2	2.83333
1118	Male	Grade 5	11	No	3.33	3.55	2.83	4.09	2.73	3.17	3.75	2.88	2.7	2.78947	1.66667	1.9	2.4	1.16667	1.5
1119	Male	Grade 5	10	No	2.75	2.91	2.58	3.36	2.64	2.42	2.25	4.63	2.3	3.47368	1.33333	2.6	3	1.16667	2.16667
1120	Male	Grade 5	10	No	1.83	1.91	2.92	1.73	2.18	2.08	1.75	3.75	2.2	2.89474	1	1.7		1	1.33333
1121	Male	Grade 5	10	No	2.83	3.45	3.42	3	2.45	3.58	2.67	2.75	3.3	2.73684	3.08333	2.3	2	2.66667	3.16667
1122	Male	Grade 5	11	No	4.25	3.64	4.5	3.36	3.91	3.25	2.25	5	4.7	2.47368	1.08333	2	1.6	1.16667	2
1123	Male	Grade 5	10	No	2.83	2.73	3.67	2.55	3.64	4	2.67	4.63	4.1	2.10526	1.5	2	1.2	1.33333	2
1124	Male	Grade 5	10	No	2.42	3.36	2.92	2.18	2.36	2.42	3.25	3.75	2.9	2.36842	1.83333	1.9	2	2.16667	2.66667
1125	Male	Grade 5	10	No	2.5	3.27	3.33	4	3.36	2.5	2.67	4.5	3.8	2.63158	1.41667	2.1		1.66667	2.33333
1126	Male	Grade 5	10	No	3.25	3.64	3.5	4.27	2.73	4.25	3.83	2.63	1.8	1.42105	1.91667	1.5	1.2	1.5	2.16667
1127	Male	Grade 5	10	No	2.58	3.18	3.67	2.82	3	3.5	2.75	4.13	3.7	1.73684	1.83333	2	1.8	1.83333	1.83333
1128	Male	Grade 5	10	No	3.42	3	3.75	3.36	2.55	2.75	2.83	3	2.6	2.52632	1.25	2.1	2.2	1.5	2.66667
1129	Male	Grade 5	11	No	2.75	3.36	3.58	3.09	3.36	4.42	3.42	3.5	2.7	2.36842	2.16667	2.3	2.4	2.16667	2.5
1130	Male	Grade 5	10	No	2.92	3.36	3.67	3.73	2.64	3.5	3.25	3.38	2.7	1.89474	2		1.6	1.33333	2
1131	Male	Grade 5	12	No	3.17	3.73	3.5	3.82	2.82	3.83	3.58	3.5	3	3.52632	2	2.4		2	3.16667
1132	Male	Grade 5	11	No	3.83	3.55	4.33	3.55	3.55	3.5	3.5	4.63	2.9	2.36842	1.91667	2.2	2.4	1.66667	2.66667
1133	Female	Grade 5	12	No	3.17	3.55	4.08	3.91	3	3.33	3.08	3.88	3.6	2.42105	2.58333		2.6	2.5
1134	Female	Grade 5	10	No	2.92	3.18	3.67	3.45	5	2.5	3.92	4.13	3.5	2.42105	1.25	2.4	1	2.5	2
1135	Female	Grade 5	11	No	2.5	3.45	3.75	3.36	3.45	3.25	1.92	4	4.2	2.15789	2.41667	2	3	1.83333	2.5
1136	Female	Grade 5	10	No	1.58	2	2	1.55	1.73	1.42	1	3.63	3.9			3.1	2.6	1.5	3
1137	Female	Grade 5	11	No	1.67	3	4.08	3.27	2	3.08	2.58	4.63	3.3	2.89474	2.08333		3.2	2	2.5
1138	Female	Grade 5	11	No	3.5	3.64	4	3.18	2.64	3	4	3.38	2.9	2.57895	1.41667	1.5	2	1.33333	1.5
1139	Female	Grade 5	9	No	2.5	2.82	4.17	3.27	4	3.33	2.83	4.38	3.6	1.47368	2	1.6	1	1.33333	2.16667
1140	Female	Grade 5	10	No	2.42	3	3.5	4.27	2.09	3.5	3.25	4	2	2.42105	1.41667	1.9	2.2	1.66667	2.16667
1141	Female	Grade 5	11	No	3	3	3.67	2.73	2.27	3.83	3	4.5	3.4	2.84211	1.33333	1.6	2	1.16667	2.16667
1142	Female	Grade 5	10	No	1.83	3.09	3.08	1.18	2.18	1.42	1.75	3.25	4.4	2	1	2.1	2.6		1.33333
1143	Female	Grade 5	10	No	2.5	2	3.25	1.91	1.91	2.17	1.58	3.88	2.3	3.05263	1.25	1.7	1	1	1.33333
1144	Female	Grade 5	11	No	3.5	3.45	2.67	3	3.36	3.33	3.08	4.25	4	2.94737	2.66667	2.4	2.6	2.83333	3
1145	Female	Grade 5	11	No	2.92	3	3.67	2.91	4.18	3.83	2.58	3.5	3.4	2.89474			2.4	2.66667	2.5
1146	Female	Grade 5	10	No	3.67	4.09	3.75	3.73	2.18	2.92	3.58	2.75	3.2	2.21053	1.41667	1.7	2.2	1.66667	1.83333
1147	Female	Grade 5	10	No	3.17	3.45	2.42	3.27	3.55	3.75	3.5	3.38	4.2	1.73684	1.5	1.3	1.4	1.33333	1.5
1148	Female	Grade 5	11	No	4.08	3.64	3.83	4.09	4.36	3.5	4	4.88	4.1	2.47368	2.41667	2.4	2.6	2.33333	2
1149	Female	Grade 5	10	No	2.92	2.82	2.33	2.64	3	2.58	2.17	4.25	2.6	1.89474	1.25	1.6	1.2	1.16667	1.83333
1150	Female	Grade 5	10	No	2.92	2.18	3.67	2.36	3	2.67	1.58	4.63	3	2.42105	1.41667	1.8	2.6	1.5	2
1151	Female	Grade 5	10	No	2.83	2.18	4.08	3.55	2.82	2.92	3.08	4.13	3.6	1.68421	1.25	1.4	1.4	1	2.16667
1152	Male	Grade 5	12	No										2.26316	2.33333	2.3	1.6	2.33333	2.66667
1153	Male	Grade 5	12	No	4.08	3.36	3.17	3.55	3.55	4	4.25	3.38	3.7		2.25	2
1154	Male	Grade 5	12	No	3.83	3.18	4.33	3.55	3.55	3.83	3.5	4.38	3.1	1.57895	1.41667	1.6	2.4	1.66667	1.83333
1155	Male	Grade 5	12	No	2.83	3.91	3.67	4.73	2.64	3.67	3	3.25	3.2	2.63158	2.41667	1.9	2.4	2.5	2.33333
1156	Male	Grade 5	11	No	2.75	3.27	3.25	3.91	2	3.33	3.42	3.13	1.6	1.31579	1.58333	1.3	1.4	1.33333	1.33333
1157	Male	Grade 5	11	No	3.25	3.55	3.92	3.18	3.64	3.25	3.33	3.5	3.5	2.31579	1.08333		1.8	1.33333	1.5
1158	Male	Grade 5	10	No	3	4.09	3.67	3.91	3.09	3.83	3.42	2.63	3.1	3.57895	2.41667	3	3	3	3.83333
1159	Male	Grade 5	10	No	2.92	3.73	4.25	3.45	3	3.17	2.83	4.75	3.6	2.78947	1.41667	1.7	2.2	1.33333	2.83333
1160	Male	Grade 5	11	No	1.5	3.18	4.17	2.55	1.55	3.42	3.5	5.75	2.8	2.47368	1.33333	2.2		1.83333	3.16667
1161	Male	Grade 5	11	No	3.58	2.91	3.67	3.45	3.73	3.67	3.17	4.25	3.3	1.21053	1.83333	1.5	1.4	1.16667	1.5
1162	Male	Grade 5	10	No	3.42	3.09	2.67	3.27	3.91	3.58	2.92	4.25	4.2	1.89474	2	1.9	2	1.83333	1.83333
1163	Male	Grade 5	11	No	3.67	3.18	3.33	3.09	3.45	2.75	2.83	4.5	4	3.42105	1.33333	2.6		1.83333	2.16667
1164	Male	Grade 5	11	No	3.17	3.09	4	3.64	3.09	2.83	3.83	4.63	3.5	2.05263	1.5		1.4	2.33333
1165	Male	Grade 5	11	No	2.33	2.91	3.67	3.45	2.73	3.17	2.08	4	3.7	2.89474		1.7	2.2	1.33333	2.5
1166	Male	Grade 5	10	No	3.67	3.82	3.08	2.55	3.36	4.5	3.42	3	3.5	2.94737	1	1.4	3.6	1	2.83333
1167	Male	Grade 5	10	No										2.21053	2.75	1.6		2.16667	2.66667
1168	Male	Grade 5	11	No	2.92	2.91	2.67	2.73	2.73	3	3.33	4	3	2.84211	1.25	1.7	2.2	1	2.16667
1169	Male	Grade 5	9	No	3.25	3.09	4.42	3.36	3.55	3.17	2.5	4.75	3.6	2.26316	2.58333	2.4	1.6	2.16667	3.5
1170	Female	Grade 5	11	No	2.67	3.18	3.5	4.36	2.45	3.67	3.58	2.5	2	2.42105	1.16667	1.5	2.4	1	1.33333
1171	Female	Grade 5	10	No	3.17	3.18	3.42	3.09	3.36	3.5	3.25	3.75	3.4	2.31579	1.58333	1.9	2.2	2.33333	2.16667
1172	Female	Grade 5	10	No	2	3.45	3.5	4.18	2.27	4.75	3.58	3.5	2			1.6	1.8	1.16667	2.83333
1173	Female	Grade 5	9	No	2.42	2.27	3	2.27	2.55	2	1.42	4.13	2.4	2.47368	2.25	2.1	1.8	2	2.33333
1174	Female	Grade 5	11	No	3	3.45	3	3.27	4.09	3.17	3	4	3.4	2.73684	2.25	2.2	2.4	2.33333
1175	Female	Grade 5	9	No	2.75	2.64	3.67	3	3.27	3	2.25	4.63	4.4	2.42105	1.33333	1.4	1.6	1.33333	1.83333
1176	Female	Grade 5	12	No	3.83	2.18	4.5	2.64	2.55	3.33	2.42	4.38	2.9	2.78947	1.08333	1.5	1.6	1.33333	2.33333
1177	Female	Grade 5	11	No												1.3	1.6		1.33333
1178	Female	Grade 5	9	No	3.08	3.18	3.58	3	3.64	3.33	3.58	2.75	3.3	2.73684	1.5	1.4	3	1.33333	2.16667
1179	Female	Grade 5	10	No	3.17	3.27	3.5	3.09	4.91	3	3.08	3.63	4.5	2.78947	1.58333	1.4	3.4	1.33333	1.83333
1180	Female	Grade 5	10	No	3.33	3.55	3.5	4.09	3	3.67	3.67	2.75	2.6	1.68421	1.16667	1.7	1.4		2
1181	Female	Grade 5	11	No	3.58	3.64	3.5	3.45	3.55	2.58	3.25	4.5	3.9	2.52632	2.08333	2.1	2.8	1.83333	3
1182	Female	Grade 5	9	No	2.42	3.27	3.5	4.36	2.82	3.17	2.92	3.63	3.8	1.63158	1.66667	1.6	1.8	1.5	1.33333
1183	Female	Grade 5	12	No										1.94737	1.91667	2.1	1.6	1.66667	1.83333
1184	Female	Grade 5	9	No	3	2.91	4.42	2.82	3.55	2.75	2.67	4.38	3.6	2.47368	1.16667	1.5	1.6	1.16667	2.5
1185	Female	Grade 5	12	No										2.36842	1.66667	1.7	2	2	2.33333
1186	Female	Grade 5	10	No	2.5	3.09	3.67	3	2.82	3.17	2.92	4.63	2.4	2.52632	1	1.5	1.6	1.16667	2.16667
1187	Female	Grade 5	11	No	2.83	4.36	3.5	4.09	4.27	2.83	4.5	4.25	4.4		1.08333		2	1.5	1.16667
1188	Female	Grade 5	12	No	4.08	3.64	3.83	4.09	4.36	3.5	4	4.88	4.1	2.31579	1.83333	2	1.8	2	2.16667
1189	Female	Grade 5	11	No	2.17	2.09	4.67	2.73	2.82	2.92	2	1.63	3.2	2.36842	1.08333	2.2	1.8	1.16667	2.16667
1190	Female	Grade 5	11	No										2.21053	2.25	2.4	2.2	2.16667	2.66667
1191	Male	Grade 4	9	No	2.67	1.82	3	1.55	2.73	2.17	2.83	4.25	3.6	2.21053	2.16667	1.7	2	2.16667	2.66667
1192	Male	Grade 4	9	No	3	2.64	3.92	2.91	4.36	2.92	2	4.88	3.9		1.66667	2.2		1.66667	1.83333
1193	Male	Grade 4	9	No	3.42	3.27	3.25	3.91	3.09	2.83	2.25	3.25	2.5		1.25	2.7	2	1.33333	2.33333
1194	Male	Grade 4	11	No										2.57895	1.33333	1.8		1.66667	2.16667
1195	Male	Grade 4	9	No	2.92	2.73	3.75	3.27	4.55	3.17	2.75	4.75	4.5	2.89474	1.16667	1.4		1.33333	2
1196	Male	Grade 4	9	No	3.08	3.18	4.25	3.27	3.18	4.17	3.58	3.75	2.5		1.91667	2.2	1.6	1.33333	1.83333
1197	Male	Grade 4	10	No	3.5	3.55	3.25	2.82	3.27	3.25	3.08	4.5	3.3		1.16667	1.3		1.33333	2
1198	Male	Grade 4	9	No	3	3.91	3.08	3.64	3	3.25	3.42	3.38	3.6	2.68421		2.2	2.2	1.66667	2.33333
1199	Male	Grade 4	9	No	2.25	2.82	3.58	2.18	2.82	2.67	2.08	4	4.3	2.47368	1.83333	1.9		1.83333	2.66667
1200	Male	Grade 4	9	No	3.17	2.91	3.75	3.18	2.18	2.33	3.42	5.5	4.3		1.08333	1.7	2.8	1	1.33333
1201	Male	Grade 4	9	No	2.5	4	3.83	2.73	3	2.83	2.25	3.88	4.2	2.84211				1	2
1202	Male	Grade 4	9	No	3.25	2.82	3.58	3.55	1.73	3.92	3.83	4.75	2.6	1.73684	1.16667	1.3	1.8	1.5	1.83333
1203	Male	Grade 4	9	No	1.92	1.55	3.58	1.27	1.45	2.08	1.67	5.38	3.3	2.42105	1.58333	2.5	1.2	1.16667	2.83333
1204	Male	Grade 4	9	No	3.92	3.45	3.17	2.55	3.45	2.25	2.92	4.88	3.7	2.10526	1.08333	1.4	1.4	1	2.16667
1205	Male	Grade 4	9	No	4.25	3.55	3.25	2.45	3.45	2.58	2.92	4.63	3.2	2.73684	2	2.5	2.6	2	2.5
1206	Male	Grade 4	10	No										2.26316	2.33333	1.7		1.66667	2.16667
1207	Male	Grade 4	9	No	2.17	3.64	4.25	2.91	4	2.58	2.25	3.88	4	3.42105	1.41667	2.3		1.16667	2
1208	Male	Grade 4	11	No	2.42	2.82	3.42	3.73	2.91	3.25	2.25	3.25	3	2.57895		2.9		1.33333	2.16667
1209	Male	Grade 4	9	No	3.42	4.18	3	3.36	3.82	3.75	2.92	5.13	4.1	3.63158	1	1.3	1.6	1	2.5
1210	Male	Grade 4	9	No	3.17	2.91	3	1.73	3.36	2.25	1.83	4.5	3.8	3.31579	1.66667	1.5	2	2	2.66667
1211	Male	Grade 4	9	No	2.92	2	2	1.36	2.27	1.83	1.5	4.5	4	3.05263	1	1.3		1	1.16667
1212	Male	Grade 4	9	No	2.83	3.09	2.67	2.91	2.09	3.08	2.83	4.38	2.5		1.16667	1.6	1.6	1.5	2.16667
1213	Male	Grade 4	9	No	2.83	3.36	3.42	3.27	2.36	2.58	2.92	3.38	2.8	3.21053	1.16667	2.3	2.2	1.16667	2.5
1214	Male	Grade 4	9	No	2.5	2.64	4	3.73	2.18	3.42	3.25	3.5	2.7	2.68421	1.91667	2.7	1.8	1.5	2.5
1215	Male	Grade 4	9	No	3.92	1.27	3.5	1.73	3.36	1.58	2.17	5.75	4.6	3.21053	1.41667	1.7	1.8	1.33333	2.83333
1216	Male	Grade 4	9	No	3.08	2.64	3.58	3.18	3.36	3.17	3.42	3.75	3.2	3.42105	1.91667	2.2	2.6	1.5	2.66667
1217	Male	Grade 4	9	No	2.42	1.91	3.42	2.55	2.18	2.5	3.67	5.13	3.4	3.42105	1.91667	2.3	2.2	3	3.66667
1218	Male	Grade 4	8	No	2.33	3.36	3.08	2.91	3.64	2.42	1.83	4.75	3	2.78947		2.3	2.8	1	2.5
1219	Male	Grade 4	9	No	2.5	3.91	4.25	3.36	2.64	3.92	2.33	3.63	3.1			2.3	2.6	1.5	2
1220	Male	Grade 4	9	No										2.47368	1.16667	1.9		1.66667	1.83333
1221	Male	Grade 4	9	No	4	3.64	3.92	3.64	3.36	2.5	3.58	3.63	3.9	2.63158	1.41667	2	2.2	1.33333	1.83333
1222	Male	Grade 4	9	No	3.33	2.55	3.75	2.27	2.64	1.83	2.67	3.63	3.2	2.36842	1.58333	2.6	3	1	2.5
1223	Male	Grade 4	9	No	3.67	3.27	3.33	2.64	3.36	2.67	2.83	4.25	3.7		1.5	2.1		1.66667	2.16667
1224	Male	Grade 4	10	No	2.92	3.55	4	2.82	4.27	3	2.83	3.75	4.7	2.84211	1.33333	1.6	1.4	1.66667	2.33333
1225	Male	Grade 4	9	No	3.42	3.27	3.25	2.82	3.18	2.25	3.08	3.63	4.4	2.63158	2.41667	2.2	2.2	2.5	2.33333
1226	Male	Grade 4	9	No	4.08	4.27	2.67	2.91	4.27	3.58	2.58	3	3	3.26316	1.58333	2.1		2.5	2.5
1227	Female	Grade 4	10	No	4.67	4.45	2.5	3.27	5.18	4	3.5	4.75	2.5	2.47368	2.66667	2.6	2.4	2.33333	3
1228	Female	Grade 4	9	No	2.5	2.18	3.25	2.73	3.55	2.83	1.67	3.75	4.4	3.52632	1	1.5		1	1.83333
1229	Female	Grade 4	9	No	2.42	2.82	4.33	2.27	2.18	3.17	2	2.75	3.3	2.36842	1.66667	2	1.6	1.33333	2.66667
1230	Female	Grade 4	10	No	2.92	3.55	3.75	3.09	2.91	3.58	3.92	4.38	4	3.05263	2.58333		3.2	3.16667	2.5
1231	Female	Grade 4	9	No	1.58	2.09	2	1.45	1.45	1.92	1.17	3.5	3.8	3.21053	1.08333	1.9		1	2.66667
1232	Female	Grade 4	10	No	4.58	3.73	1.92	3.27	4.36	3.08	3	5.88	5	2.36842	1.66667	2.1	2	1.33333	2.33333
1233	Female	Grade 4	10	No	3.67	3.09	2.92	3.18	3.45	3.25	4	2.5	2.8	1.52632	3	3.3	1.6	2.66667	3.5
1234	Female	Grade 4	9	No	2.83	2.64	2.92	2.82	3.09	2.5	2.83	3.13	3.4	3.21053		1.7	1.6	1.16667	2.83333
1235	Female	Grade 4	9	No	3	2.64	3	2.64	3.55	2.17	2.33	3.63	3.7	3.84211	1	2.7	3	1.33333	1.16667
1236	Female	Grade 4	9	No	3	3.55	3.5	4.27	1.91	3.5	3.17	2.25	1.4	2.78947	1.5	1.5	3.2	1.66667	1.66667
1237	Female	Grade 4	9	No	2.42	2.18	3.92	3.45	1.73	3.42	2.75	3.38	2.7	3.15789		1.4		1.33333	1.66667
1238	Female	Grade 4	9	No	3.33	2.91	3.5	3.09	4.64	2.5	2.42	4.13	3.9	2	2.08333	2.5	2	3	2.33333
1239	Female	Grade 4	9	No	3.67	2.64	4.33	3.09	4.55	3.17	4.25	4	2.5	2.52632	1.41667	2.1	2.2	1.16667	2.33333
1240	Female	Grade 4	9	No	3.33	3.55	2.92	3.45	3.27	3.17	3.42	3.5	2.8	2.36842	1.33333	1.7	3.2	1.5	2.83333
1241	Female	Grade 4	9	No	2	3	4.75	2.18	2.18	2.75	1.75	5.25	4.4	2.68421	2.16667	2.6		1.5	1.66667
1242	Female	Grade 4	9	No	3.25	3.45	3.17	3.45	4.64	2.67	2.5	4.13	4.1	3.52632	1.33333	2.7	2.4	1	2.5
1243	Female	Grade 4	8	No	2.42	2.36	4.17	2.18	2	1.67	1.33	3.38	2.3	3	1.25	1.5		1	1.66667
1244	Female	Grade 4	9	No	3.08	3.91	3.83	3.18	3.18	3.67	3.75	3.38	3.1	2.15789	1.33333	1.7	2	1.16667	1.66667
1245	Female	Grade 4	9	No	3.25	3.82	5.17	2.55	2.55	2.83	3.08	4.88	2.5	2.63158	2.25		3.2	2.33333	2.5
1246	Female	Grade 4	9	No	3.42	3.18	3.58	3.36	3.36	3.33	3.08	3.38	3.2	2.15789	1.5	1.9	1.4	1.5	3.33333
1247	Male	Grade 4	9	No	1.75	2.55	3.75	2	2.55	2.75	2	4	3.8	2.42105		1.7			2.83333
1248	Male	Grade 4	10	No										3.52632	1.75	2.9	1.8	2	2.5
1249	Male	Grade 4	9	No	3.17	3.64	3.33	3.09	3.55	3.75	3.42	3.63	3.9	3.26316	1.41667	2.4		2.16667	2
1250	Male	Grade 4	9	No	3.33	2.91	3	2	2.27	2.83	2.83	4.5	3.7	2	1.08333	1.9	1.4	1.33333	1.5
1251	Male	Grade 4	9	No	1.42	2.45	2.42	2.64	1.55	2.17	1.92	4.5	3.5	1.68421	1.41667	1.1	1.4	1.33333	1.66667
1252	Male	Grade 4	9	No	2.17	3	2.33	2.36	3	2.83	2.33	3.5	3.6	3.15789	1.91667	2.9	3.4	2	3.33333
1253	Male	Grade 4	9	No	3.17	2.55	2	2.45	3	2.67	2.83	3.63	3.1	2.84211	1.08333	1.7	1.6	1.16667	1.66667
1254	Male	Grade 4	10	No										1.52632		1.9		2.5	2.5
1255	Male	Grade 4	9	No	2	3.09	3.25	2.64	1.73	2.08	2.25	2.38	3.1	2.47368	1.58333	1.8	1.6	1.66667	2
1256	Male	Grade 4	9	No	3.17	2.91	3.33	3.36	2.09	3	3.17	2.5	2.7	2.68421	1.5	2.4	2.2	1.16667	1.83333
1257	Male	Grade 4	9	No	3	2.45	3.83	2.82	1.82	3	2.08	5.13	3.1	2.94737	1.58333	1.9		1.5	2.33333
1258	Male	Grade 4	9	No	3	3.73	3.67	4.18	2.73	3.42	3.17	3.38	2.4	1.68421	1.5	1.3		1.33333	1.66667
1259	Male	Grade 4	11	No	2.67	3.36	4.42	3.09	3.91	2.92	2.17	3	4.1	2.52632	2.08333		2.6	2	2.66667
1260	Male	Grade 4	9	No	3.25	3.09	3.08	2.91	4.27	2.75	3.17	4.13	3.5		2.91667	2.7			2.33333
1261	Male	Grade 4	8	No	3.83	3.18	3.25	3.36	3.55	4.08	3.67	4.25	3.5	2.36842	1.66667	2	1.6	1.66667	2.5
1262	Male	Grade 4	10	No	2.75	2.91	2.67	1.91	3	2.42	2.42	4.75	3.7		1.75	2.1	2.2	1.5	2.33333
1263	Male	Grade 4	9	No	2.83	2.91	2.67	2	3	2.5	2.5	4.63	3.7	2.68421	1.75	1.8	1.4	1.5	2
1264	Male	Grade 4	9	No	3.08	3	2.75	3	3.45	3.17	2	4.75	3.9		1.75	2.1		1.33333	2.16667
1265	Male	Grade 4	9	No	2.42	2.82	4.67	2	2.73	3	2.92	4.38	2.7	1.84211	1.41667	1.6	1.6	1.16667	2.33333
1266	Male	Grade 4	9	No										2.26316	1.83333	2.5	2	2.33333	2.66667
1267	Male	Grade 4	10	No	2	2.82	3.83	1.73	2.45	2.42	2	4	3.1	2.73684	1.5	1.8		1.66667	2.16667
1268	Male	Grade 4	9	No	4.25	2.64	3.08	2.82	3.82	3	1.67	5.13	4.6	2.57895	1.41667	2.2	2	1	2
1269	Male	Grade 4	10	No	1.83	2.73	3	2	1.45	2.67	1.83	3.13	2.8				1.4		1.66667
1270	Male	Grade 4	9	No	1.92	2.55	2.83	2.64	2.09	2.25	1.5	3.75	1.8	2.05263	1.75	1.7	2.6	1.16667
1271	Male	Grade 4	9	No	3.17	3	4.17	3.45	3.73	3.75	3.25	4.88	4.9	3.21053	1.41667	2.3	2	1.16667	2.33333
1272	Male	Grade 4	9	No	1.42	2.45	2.42	2.64	1.55	2.17	1.92	4.5	3.5	2.47368	1.91667	2.5	2	2	2.33333
1273	Male	Grade 4	9	No	3.25	2.91	3.17	3.09	3.55	2.92	2.67	4	4.1	1.84211	2	2.1		2.16667	2.16667
1274	Male	Grade 4	10	No	3.33	3.64	3.17	3	4.09	3.25	2.92	4.25	5.5	2.57895	1.83333	1.7	1.6	1.66667	2.33333
1275	Male	Grade 4	9	No	2.25	3.27	2.67	3.91	2.18	2.83	2.83	1.75	1.5		1.5	1.8	1.8	1.33333	2
1276	Male	Grade 4	9	No	3.42	3.45	3.67	3	3.55	2.83	3.08	3.75	3.6	2.73684	1.16667	1.5	1.4	1.16667	2
1277	Male	Grade 4	9	No	2.58	3.18	3.83	2.27	2.18	3.67	2.08	4.63	3.3	3.05263	1.33333	2.2	3	1.33333	2.5
1278	Male	Grade 4	10	No	2.75	3	3.67	3.73	3.73	3.17	3.33	4.38	4.4
1279	Male	Grade 4	9	No	2.92	2.36	3.5	4.09	2.09	2.5	3.17	4	2.8	3.52632	2	3	3.4	2.5	4
1280	Male	Grade 4	9	No	3.17	2.09	3.08	2.18	2.27	1.92	1.67	4.38	3.8	2.21053	1.08333	2.1		1.16667	1.83333
1281	Male	Grade 4	10	No	3.17	3.45	2.08	3	4	2.92	3.5	4.75	3.1		1.5	1.8	1.2	1.16667	1.5
1282	Female	Grade 4	8	No	2.67	2.91	3.5	3	2.73	2.33	2.08	3.38	3.9	1.68421	1.16667	1.2	1.8	1	1.66667
1283	Female	Grade 4	9	No	2.58	2.73	2.58	2.45	4.09	2.5	2	4.75	4.3	3.31579	1.08333	1.9	2	1.33333	2.16667
1284	Female	Grade 4	9	No	3.25	2.36	2.83	3.82	2.91	3.67	2.75	3.75	4.8	2.73684	1.91667	2.6	2.2	2	2.83333
1285	Female	Grade 4	9	No	2.67	3.18	2.58	3.09	3.27	2.75	2.83	4.25	3.8	2.15789	1.16667	1.5	1.8	1.16667
1286	Female	Grade 4	9	No	2	2.73	3.17	3.55	2.18	2.17	2.17	3.13	2.6		2	2.9	3.2	2.16667	3.33333
1287	Female	Grade 4	9	No	2.83	2.64	3.58	3.73	1.91	3	3.17	2.88	1.6	1.89474	1.33333	1.9	1.8	1.33333	2
1288	Female	Grade 4	9	No	2.33	3.55	3.17	2.82	3.64	2.17	2.58	4.25	3.8	1.47368	1.66667	1.5	2	1.33333	1.33333
1289	Female	Grade 4	9	No	3	3	3.33	3.64	3.18	2.83	3.08	3.38	2.6	2.21053	1.66667	1.6	1.6		1.83333
1290	Female	Grade 4	9	No	3.58	3.55	4	2.45	2.73	3.25	2.5	4.13	4	2.57895	1	1.7	2	1.16667	1.16667
1291	Female	Grade 4	8	No	3.25	3.82	3.42	3.91	2.18	3.33	2.5	2.75	1.8		2.75	2.2	2.2	1.16667	2.83333
1292	Female	Grade 4	8	No	3.33	3.64	2.83	2	3.82	2.33	2.08	4.75	2.2	2.05263				1.5	2
1293	Female	Grade 4	9	No	2.75	3.91	3.58	3.18	3.09	3.33	2.92	3.13	3.2	2.31579	1.41667		2.4		1.66667
1294	Female	Grade 4	10	No	3.17	3.09	2.58	2	3.36	2.08	2.83	3.5	3.1	2	2.58333	1.3	1.8	1.83333	2
1295	Female	Grade 4	9	No	2.92	3	3.83	3	3.36	3.08	3.08	4.13	3.7	1.57895	1	1.5		1.16667	1.33333
1296	Female	Grade 4	9	No	3.5	3.27	2.83	2.91	3.82	2.75	3.33	3.88	3.6	2.63158	1.08333	1.7	1.8	1	1.5
1297	Female	Grade 4	8	No	2.67	2.36	3.25	2.91	2.09	3	2.42	3.63	3	2.21053	1.5	2	1.8	1.66667	2.16667
1298	Female	Grade 4	9	No	2.08	3.64	3.17	2.82	1.91	2.25	2.67	3	2.3	3.21053	1.41667	1.7	2.8	1.83333	1.83333
1299	Female	Grade 4	8	No	3.42	3.09	3.92	3.45	4	2.67	2.58	4.38	3.5	3.10526	1.33333	1.5	2.8	1.16667	2.33333
1300	Female	Grade 4	9	No	2.58	2.27	3.42	3.09	2.64	3.33	2.83	3	3.9	3.15789	1.41667	2.3		1.33333	2.33333
1301	Female	Grade 4	9	No	1.58	2.45	2.75	1.91	3.73	1.75	1.58	3.13	2.7	3.05263	1.08333	1.7		1.16667	1.83333
1302	Female	Grade 4	9	No	2.42	2.64	4.5	2	2.82	3.08	2.92	4.13	2.6	3.42105	1.33333		2.8	2	3.16667
1303	Female	Grade 4	8	No	2.17	2.64	3.5	2.36	2.64	3.42	2.92	3.88	3.2	2.47368	1.08333	1.5	1.6	1.16667	1.83333
1304	Female	Grade 4	9	No	1.42	2.45	2.42	2.64	1.55	2.17	1.92	4.5	3.5	3.36842	1.25	2.3	1.8	1.66667	2.16667
1305	Male	Grade 4	8	No												1.5
1306	Male	Grade 4	9	No	3.5	3.45	3.5	3.64	3.55	3	3.67	3.13	3.6			2.3	2	1.33333
1307	Male	Grade 4	9	No	4	3.45	4.33	2.91	4.09	3	2.75	4.13	4.9	2.68421	1.58333	2.1	2	1.66667	2.5
1308	Male	Grade 4	9	No	2.92	2.45	4.33	2.18	3.27	2	1.42	2.75	2.8		1			1.66667	1.5
1309	Male	Grade 4	8	No	3	2.36	4.25	2.73	3.09	2.17	2.42	3.5	2.7	2.52632	1.75	2	1.8	1.83333	2.33333
1310	Male	Grade 4	9	No	2.33	2.91	3.5	2.73	2.09	2.33	2.67	4.13	4	1.57895	1.08333	1.1		1	1.66667
1311	Male	Grade 4	8	No	4.92	4.45	4	2.82	3.82	3	4.17	4.13	4	3.21053	1.5		1.6	1	2
1312	Male	Grade 4	10	No	2.25	2.82	3.67	3.09	2	3.33	2.67	4	2.1	1.63158	2.41667	2	1.2	2	2.33333
1313	Male	Grade 4	10	No	2.75	2.55	3.67	3.27	2.09	2.42	1.83	3.63	3.4		1.16667	1.3	1.6	1.33333	2.16667
1314	Male	Grade 4	9	No	2.67	1.82	3	1.55	2.73	2.17	2.83	4.25	3.6	2.73684	1.16667	1.9		1	2.33333
1315	Male	Grade 4	9	No	3.67	2.82	3.5	2.82	3.73	3.17	2.5	5.38	4.2	2.94737	1.41667	1.4		1.5	2.16667
1316	Male	Grade 4	9	No	4.17	3.55	3.17	3.09	3.73	3.67	4.25	5.63	2.9	2.36842		2.6	2.6	2.16667	2
1317	Male	Grade 4	10	No	2.5	2.27	2.75	1.64	3	2.17	1.33	3.75	2.7	2.42105	2.16667		2.4	2.5	2.66667
1318	Male	Grade 4	9	No	2.67	2.55	3.42	2.91	3.09	2.5	2.5	4	4.6	2.15789	1.5	2.1	1.2	1.5	3
1319	Male	Grade 4	8	No	4.17	3.36	2.17	3.27	3.64	3.58	3.58	3.25	3.3	2.68421	1	1.9	2.8	1.16667	1.5
1320	Male	Grade 4	9	No	3.75	4.27	3.33	3.73	4.27	3.58	2.92	3.13	2.6	2.78947	2.41667	2.4	2.2		2.5
1321	Male	Grade 4	9	No										2.84211	2.08333	2	1.2	1.66667	3
1322	Male	Grade 4	9	No	2.25	2.18	3.08	2.91	1.91	2.17	1.75	3.75	2.7	2.57895	1.16667			2	2
1323	Male	Grade 4	9	No	2.08	2.36	2.67	1.73	2.27	1.75	1.75	5.5	3.6	3.31579	1.58333	2.1	1.4	2	3.33333
1324	Male	Grade 4	10	No	2.67	2.18	3.75	2.09	2.36	1.67	1.67	4.88	5	3.10526	1	1.5	2	1	1.66667
1325	Male	Grade 4	10	No	1.67	2.55	3.33	1.91	2.45	2.08	1.83	4	4.2		2.16667	2		1.66667	2.33333
1326	Male	Grade 4	9	No	4.83	2.82	3.25	3.27	3.55	3.5	3.67	3.13	3.4	2.21053	1.58333	1.9		1.5	2.33333
1327	Male	Grade 4	10	No	2.67	2.64	4.42	4.55	3.91	3.67	3.25	3.75	2.5	2.05263	3.08333	2.1	1.8	2.83333	2.83333
1328	Male	Grade 4	9	No	3.17	3.27	3.08	3	4.09	2	1.75	4.38	2.7	2.68421	1.41667	1.7	1.6	1.66667	2
1329	Male	Grade 4	11	No										3.47368	1.33333	3.1	2.4	1.16667	2.66667
1330	Male	Grade 4	9	No	2.5	3.27	3.42	2.64	3.73	2.67	2.92	4	4	2.57895	1.5	2.2		2.16667	2.5
1331	Male	Grade 4	9	No	1.83	2.64	3.58	2.55	1.91	2.92	1.33	3.38	2.7		2	2	3	1.66667	2.83333
1332	Male	Grade 4	9	No	3.58	3.09	3	2.18	4.82	2.25	2	3.75	4.3	3.15789	1.33333	2.8	1.8	2.33333	3
1333	Male	Grade 4	9	No	2.83	2.55	2.83	2.18	4.45	3.75	2.33	4.63	5.2	2.52632	2.16667	1.6	2.4	2	2
1334	Male	Grade 4	9	No	4.33	4.27	4	3.55	3.91	3.92	3.75	4.13	2.1	2.42105		1.8	1.8	1.66667	2.5
1335	Female	Grade 4	8	No										3	1.83333	2.1		1.5	2.16667
1336	Female	Grade 4	10	No	3.17	3.27	3.67	3.09	4.18	3.08	2.92	3.75	3.9	1.73684		1.4	1.4	1.5
1337	Female	Grade 4	9	No	2.33	2.36	3.17	2.36	2.27	2.75	1.83	3.38	3.7	3.10526		1.9	2.6	1.66667	1.66667
1338	Female	Grade 4	8	No	4.42	4.27	2.83	3.55	4.27	3.42	4.25	5.38	4.4	3.10526	1.33333		1.8	1	3
1339	Female	Grade 4	9	No	2.42	2.73	4	2.91	2.09	2.58	2.67	3.88	3.2		1.5	1.7	2.2	1.5	3.16667
1340	Female	Grade 4	9	No	2.75	3.09	4.17	3.36	4.36	2.08	2.17	3.25	4.4	3.26316	1.25	1.8	1.4	1.5	2.66667
1341	Female	Grade 4	9	No	2.58	2.64	3.67	2.91	2.45	2.67	2.67	4.13	2.9	2.78947	3.16667	3.4	2	2.5	3.16667
1342	Female	Grade 4	9	No										2.47368	1.33333	1.8	2	1.5	2
1343	Female	Grade 4	10	No	2.75	2.91	3.5	3.64	3.27	3.17	3.33	4.25	3.6	2.26316		2.1		2.16667
1344	Female	Grade 4	9	No	1.58	2.36	2.83	2.36	2.64	2.08	1.67	3.13	3.1		1	1.9	1	1	1.66667
1345	Female	Grade 4	9	No	2.42	2.91	2.58	2.18	2.36	2.58	2.25	4.63	3.1	2.73684	1.08333	1.8	2.6	1.33333	2.33333
1346	Female	Grade 4	9	No	2.58	2.91	3.33	2.91	3.18	3.08	2.33	3.75	3.1		1.08333
1347	Female	Grade 4	10	No	4.5	4.27	3.42	3	4	2.67	4.92	3.38	1.7			2.3	1.8	1.66667	2.33333
1348	Female	Grade 4	9	No										3.36842	1	2.8	1	1.16667	2.5
1349	Female	Grade 4	9	No	1.42	2.91	3.25	3	1.91	2.67	2.5	3.13	3.5	2.94737	1	1.6		1.16667	2.16667
1350	Female	Grade 4	8	No	2.75	3.09	3.92	3.09	3.45	3.5	3.08	4	4	2.68421		1.5	1.6	1	1.5
1351	Female	Grade 4	9	No											1.75		2.2	1.33333	2.5
1352	Female	Grade 4	9	No	2.92	3	3.5	4.09	1.91	3.42	3.33	2.75	1	1.36842	1.33333		1.2	1.16667	1.66667
1353	Female	Grade 4	9	No	3.08	2.82	2.5	2.36	2.55	2.67	1.67	4.38	3.9	2.05263		1.6	2	1.83333	2
1354	Female	Grade 4	8	No	1.92	2.64	3.25	3.36	2.09	2.58	2.33	3.88	2.7	2.10526	2.16667	2		1.83333	2.66667
1355	Female	Grade 4	9	No	1.75	2.55	3.75	2	2.55	2.5	2	3.88	3.8	2.84211		1.6	1.4	1.5	2.5
1356	Female	Grade 4	8	No	2.25	2.82	3.83	3.09	2	3.17	2.67	4.13	2.1	3.31579	1.58333	2.4		1.33333	2.16667
1357	Female	Grade 4	9	No	2.33	3.27	4.33	3.36	1.91	2.67	2.5	3	3.4	2.57895	1.16667	2	1.4	1.5	3
1358	Female	Grade 4	9	No	1.75	2.45	4.92	2.55	2.55	1.75	2.25	4.13	2.8	2.84211	1.08333	1.6	2	1	1.5
1359	Female	Grade 4	9	No	3.25	2.64	3.83	2.55	3	2.83	2.83	4.63	4	2.47368	1.08333	1.7	2.6	1.33333	1.66667
1360	Female	Grade 4	9	No	3.67	3.18	3.33	3.09	4.36	3.17	3.75	3.88	4.4	2.94737	1.08333	1.5	2	1.16667	2.16667
1361	Male	Grade 4	9	No	3.58	3.82	3.42	3.55	3.18	3.25	3.33	3.5	3	2.42105	2.16667	2.2	2	2.16667	2.16667
1362	Male	Grade 4	10	No	4.67	3.82	3.17	3.64	3.82	3.25	3.67	4.88	3.8	2.31579	2.08333			2.16667	1.83333
1363	Male	Grade 4	9	No	2.17	2.55	4	3	1.73	3.17	2.25	2.63	3.4	2.68421	1.25	2.1	2	1.5	2
1364	Male	Grade 4	8	No	1.75	2	2.42	1.73	1.82	2	1.67	3.63	3.9	2.73684	1.41667	1.5	2	1	1.5
1365	Male	Grade 4	9	No	1.83	2.55	3.08	3	2.36	2.25	1.5	3.88	2.9	2.68421	2.58333	2.4	2	1.33333	3
1366	Male	Grade 4	9	No	2.5	2.55	2.92	3.73	2.18	3.25	1.92	2.38	1.5	1.73684	1.25	1.8	2	1.33333	2.16667
1367	Male	Grade 4	9	No	2.5	3.45	3.75	3	1.82	2.33	1.67	3.75	3.2	2.84211	1	1.5		1
1368	Male	Grade 4	10	No	2.42	3.73	3.08	3	3.45	3.58	3.42	3	3.3	1.73684	1.91667	1.7	1.8	1.66667	1.5
1369	Male	Grade 4	9	No	2.58	2.73	3.5	3	3.09	2.75	2.5	3.5	3.2	2.26316	2.25	2	1.8	2.16667	2
1370	Male	Grade 4	10	No	3.17	3.45	3.5	2.73	3.27	2.58	2.92	2.63	3.3			1.9	2.4	1.66667	2.16667
1371	Male	Grade 4	10	No	2.67	3.36	3.17	3.73	2.55	3.33	2.92	2.38	2.6	2.15789	1.75		1.6	1.83333	2.83333
1372	Male	Grade 4	9	No	2.92	3.27	4.33	2.73	2.91	3.25	3.25	4.13	4.8	2.73684	1.25			1	1.5
1373	Male	Grade 4	9	No	2.58	4.09	3.83	3.55	2.36	2.42	3.08	3.75	3.5		2	2.6	3	2.33333
1374	Male	Grade 4	9	No	2.42	2.18	2.92	2.27	1.91	3.5	1.58	3.5	2.8	2.21053	1.5	1.4	2.2	1.5	2.16667
1375	Male	Grade 4	9	No	2.58	2.82	3.42	2.18	2	2.83	2.33	3.13	4		1.25			1.33333	1.83333
1376	Male	Grade 4	9	No	3.17	3.73	4.08	2.91	4	3.25	3.17	4.63	4.2	2.47368	1.5	1.8	1.4	1.66667	2
1377	Male	Grade 4	10	No	3.17	2.64	3.5	2.27	2.82	2.08	2.83	4	3.7	2.63158	2.08333	2.2	2.2	2	2
1378	Male	Grade 4	9	No	2.42	2.82	3.17	4	1.91	3.08	3.5	2.88	1	2.36842		1.6	1.2		1.83333
1379	Male	Grade 4	9	No	3.58	3.73	1.92	2.55	3.64	3.58	3.58	4.75	3.6	2.57895	1.66667	2	1.8	1.66667	1.66667
1380	Male	Grade 4	9	No	3.17	3.18	3.58	2.73	3.45	2.08	2.17	4.38	5.1	2.94737	2.41667		1.2	1.83333
1381	Male	Grade 4	9	No	3.75	3.82	3.33	3.18	4.36	3.08	3.92	4.38	4.5	2.78947	1.08333	1.5		1.5	2.5
1382	Male	Grade 4	9	No	3.25	3.18	3.92	3.64	3.09	3.83	3.33	4	2.7		1.58333	2.8	2.2	1	1.66667
1383	Male	Grade 4	9	No	3	1.73	3.67	3	3.73	3	2.33	3.63	3.4	2.78947		2			1.83333
1384	Male	Grade 4	8	No	2.83	3.18	3.83	2.64	2.73	2.83	2.67	3.63	3.8	2.26316	1.33333	2.2	1.8	2.5	2.16667
1385	Male	Grade 4	9	No	2.58	3.91	4.5	2.55	2.64	2.58	3.58	4.63	2.8
1386	Male	Grade 4	9	No	1.25	2.91	3.08	1.64	1.82	2.42	1.25	4.88	2.4	2.73684	1.08333	1.7	2.2	1	1.83333
1387	Male	Grade 4	9	No	2.5	2.27	3.17	2.09	2	2	2	5	3.9	2.05263	1.25		3	1.33333
1388	Male	Grade 4	10	No	3.25	3.36	2.75	2.91	3.18	3	3.25	3.38	3.9	2.21053	2.33333	2.1	3	1.33333	2.16667
1389	Male	Grade 4	9	No	1.42	2.09	3	1.09	1.82	1.83	1.17	4.25	3.5	3.52632	1.5	1.6	2.6	1.83333	2.16667
1390	Male	Grade 4	9	No	1.42	2.18	3.75	2.18	2.36	1.75	1.25	3.38	3.9	2.31579	1.25	1.3	1.6	1	1.33333
1391	Male	Grade 4	9	No										2.57895	1.91667	2	2.6	2.16667	2.5
1392	Male	Grade 4	9	No	2.67	2.18	4.58	2	1.18	3.33	2.92	4.13	2.7		1.41667	1.8	2.2	1.83333	2.5
1393	Female	Grade 4	8	No	2.17	2	3.83	3.27	3.09	3.5	2.25	2.75	4.6	2.68421	1.16667	1.9	1.8	1.66667	3
1394	Female	Grade 4	9	No	2.33	1.27	3.08	3.45	2.09	2	1.83	4.25	2.2			1.4	2	1.33333	2
1395	Female	Grade 4	9	No	2.33	3.45	4.58	2.91	3	3	2.92	4.25	3.9	2.63158	1.33333	1.9	2.4	1.5	2.16667
1396	Female	Grade 4	11	No	3.17	3.18	3.5	2.64	2.64	2.92	2.67	3.75	2.7	2.63158	1.58333		2.4	1.83333	2.66667
1397	Female	Grade 4	9	No	3.5	3.45	3	2.91	4.36	3.33	3.33	5.13	3.6	2.94737	1.08333	1.8	2.8	1.66667	2.5
1398	Female	Grade 4	9	No	2.33	3	3.83	2.18	2.73	2	1.5	3.5	3.3	2.94737	1.41667	2.1	2.6	1.33333	2.33333
1399	Female	Grade 4	9	No	3.17	2	3.08	2.64	3.27	2.42	2	4.13	3.4	3.15789	1.58333	2.1		1.5	2.33333
1400	Female	Grade 4	9	No										3.31579	1.25	1.9	3.4	1.5	2.5
1401	Female	Grade 4	9	No	2.25	3.18	2.42	3.18	3.45	2.08	1.75	3.5	4	2.89474	1.16667	1.9	1.8	1.66667	2.66667
1402	Female	Grade 4	9	No	2.25	2.45	2.75	2.91	2.45	2.42	1.33	2.63	3			1.8	1.4	1.16667	2.66667
1403	Female	Grade 4	9	No	1.92	2.18	3.33	2.55	3.36	2.33	2.33	4.13	3.5	2.89474	1	1.6	2.8	1.33333	1.66667
1404	Female	Grade 4	9	No	3.25	3.36	3.83	3.73	2.36	3.33	3.58	2.5	2.4		1.16667	1.5		1.33333	1.66667
1405	Female	Grade 4	8	No
1406	Female	Grade 4	9	No	3.17	3.64	4.42	3.45	4.55	3.33	3.58	4.38	3.5	2	1.91667	1.8		1.16667	1.66667
1407	Female	Grade 4	9	No	2.67	2.82	3.33	2.55	2.73	2.25	1.83	4	3.7	3.47368	1	2.3		1	2.33333
1408	Female	Grade 4	9	No	2.75	4.27	4.33	2.73	3.45	2.58	2.5	3.75	4.1	2.42105	1	1.6	1.8	1.33333	2.33333
1409	Female	Grade 4	9	No	2.33	3	3.92	1.91	3	2.08	1.67	3.5	3.2	2.84211	1.25	1.6	1.8	1.5	3
1410	Female	Grade 4	9	No	3.25	3.45	4	3.45	4.18	2.75	2.83	4.5	3.5			2.8	2.6		3.16667
1411	Female	Grade 4	9	No	3.58	2.73	3	2.73	5.09	2.58	3.08	4.63	4.1	2.31579	1.25	2	1.8	1.33333	2.5
1412	Female	Grade 4	9	No	3.33	3	3.58	3.36	3.18	2.83	2.83	3.75	3.1	2.05263	2.16667	1.8	2	2.33333
1413	Female	Grade 4	9	No	2	2.64	3.33	4.36	2.18	2.67	2.33	3.13	2.8	2.78947	1.33333	1.5	2.2	2.16667	2.66667
1414	Female	Grade 4	8	No	1.83	2.82	2.5	1.18	1.18	1.25	1	3.5	3.5	3.52632	1	1.8	3.2	1	3
1415	Female	Grade 4	8	No	3.42	3.36	3.58	3.18	3.55	3.67	2.83	3.63	2.3	2.57895	1.91667	2.5	2.2	2	2.5
1416	Male	Grade 5	10	No										2.42105	1.66667	2.3	3.2	1.83333	2.66667
1417	Male	Grade 5	10	No	2.92	2.55	3.33	3	2.55	2.67	2.75	2.63	2.2	2.78947	1.58333		2	1.33333	2.16667
1418	Male	Grade 5	11	No	3.5	3.73	3.25	3.09	3.91	3	3.83	3.88	3.2	2.31579	1.66667	1.3		1.33333	2.33333
1419	Male	Grade 5	10	No	5.42	3.73	2.25	4.27	4.64	3.5	5.25	4.88	3	2.73684	1.41667	2.2		1.5	2.66667
1420	Male	Grade 5	10	No	4.17	3.45	4.58	3.55	3.91	3.67	3.08	4.5	3.7	1.52632	2.08333	1.9	1	2	2.33333
1421	Male	Grade 5	10	No										2.42105	2.08333	2	2	2.33333	2.33333
1422	Male	Grade 5	10	No	1.67	3.27	3.33	2.18	2.73	2.17	2.5	4.88	3.9	2.73684	1.58333	2.2		1.5	2
1423	Male	Grade 5	10	No	2.33	2.91	2.58	2.36	3.27	1.92	2.17	3.88	4	2.31579	2.33333	2.1	2	2.83333	2.33333
1424	Male	Grade 5	9	No	3.42	3.45	3.58	3.27	2.36	3.25	3.75	4.63	3.7	3.21053	1.08333	2.2		1.16667	2.16667
1425	Male	Grade 5	9	No	3.17	2.73	4.33	3.73	4.18	2.92	2.92	4	4.3	3.47368	1	1.8	1.6	1.5	1.83333
1426	Male	Grade 5	10	No	3.17	2.91	2.58	2.73	3	3.25	2.5	4.5	5	2.68421	1.75	1.6	1.8	2.16667	2.16667
1427	Male	Grade 5	11	No	3.42	2.45	3.08	3.64	3.36	3.17	3.33	3.5	3.1		1.33333	1.6	1		1.66667
1428	Male	Grade 5	10	No	2.25	2.91	3.5	2.36	2.82	2.67	2.08	4.88	3.4	2.68421	1.08333	1.9	2.6	1.16667
1429	Male	Grade 5	9	No	2	2.45	3.5	1.73	2.18	2	1.5	2.75	3.5	3.21053	1	1.7		1.16667	1.5
1430	Male	Grade 5	10	No	2	2.45	3.17	1.64	1.82	2.25	1.25	2.88	3.6	2.57895		2.1	1	1.5	2.83333
1431	Male	Grade 5	10	No	4.33	3.09	2.75	2.73	3.45	3.5	2.42	3.88	2.8	2.57895	1.16667	1.3	2.8	1	1.33333
1432	Male	Grade 5	10	No	2.92	2.91	3.42	3	3.09	2.92	2.42	4	4.1	3.05263	1.08333	2.3	2	1.33333	2.33333
1433	Male	Grade 5	10	No	3.08	4.45	3.08	3.73	2.91	2.67	3	3.5	3.3	2.15789	1	1.5	1	1	1.66667
1434	Male	Grade 5	11	No	3.17	3.45	2.25	2.73	3.18	2.67	2.33	4.5	3.4	2.05263	1.83333	1.7	1	1.66667	2.33333
1435	Male	Grade 5	10	No	2.33	4.09	3.33	2.91	2.91	4	3.58	3.25	4.6	3.31579	1.83333	2.6		2	2.33333
1436	Male	Grade 5	10	No	2.83	3.45	3.42	3.64	3.82	3.67	3	3.75	3.9	2.52632	1.33333	1.8	3	1.33333	3.16667
1437	Male	Grade 5	10	No	2.67	2	3.42	2.09	2.64	1.75	1.83	4.25	3.2	2.94737	1.66667	1.5	1	1.16667	1.83333
1438	Male	Grade 5	10	No										2.31579	1.08333	1.5	2.4	1	2.33333
1439	Male	Grade 5	10	No	1.92	2.09	3.17	2.36	2.45	2.33	1.83	3.13	5.2		1.16667	1.9	2.4	1	1.83333
1440	Male	Grade 5	10	No	2.92	3.36	2.67	2.64	2.82	1.92	1.92	4.75	4	2.89474	1.66667	2	1	1.66667	1.66667
1441	Male	Grade 5	11	No	3.67	3.09	3.58	3.27	2.55	2.67	3.33	4.63	3.7	2.73684	1.08333	2.2		1.16667	2
1442	Male	Grade 5	10	No	3.67	3.27	3.58	3.18	3.27	3.83	2.33	3.88	2.9	2.73684	1.41667	2.4	1.4	1.66667	2.16667
1443	Male	Grade 5	10	No										3.47368	1.41667	2.4	1.8	1.33333	2.33333
1444	Male	Grade 5	11	No	3.33	3.18	3	2.45	3.27	2.92	2.67	4	3.6	2.89474	1.08333	1.7		1.16667	1.16667
1445	Male	Grade 5	11	No	3.75	3.55	4	3.18	4.27	3	4.25	5	4.9	1.52632	2.83333	2.8	1	2.66667	3.16667
1446	Male	Grade 5	10	No	3.58	3.91	3.92	3.55	2.82	3.08	2.83	4.38	4.1	3.47368	1.83333	3.2		2	2.5
1447	Male	Grade 5	10	No	2.83	3.45	4.17	2.64	2.55	3.08	2.58	4	3.9	2.63158	1.5	2.5	2.8	1	3
1448	Male	Grade 5	10	No	4.25	3.64	3.83	3.18	2.91	2.83	3.5	5.25	3.9	2.52632	1.91667	2.6	2.6	2.16667	2.83333
1449	Male	Grade 5	11	No	4.25	3	4.75	2	2.27	3.08	2.25	4.13	3.7	2.42105	2.16667	2.3	1.8	1.66667	2.66667
1450	Female	Grade 5	11	No	2.83	2.55	2.67	1.55	2.73	2.25	1.58	3.13	2.7	2.94737	1.08333	1.4	1.8	1
1451	Female	Grade 5	11	No	3.5	3.18	3.5	3	3.09	3	2.75	4.38	4.4	3.10526	1.16667	1.5	2.8	1	1.66667
1452	Female	Grade 5	10	No	1.42	1.91	2.5	1.45	2.27	1.25	1.42	4.5	3.7	2.73684	1.25	1.8	1.8	1.5	2.83333
1453	Female	Grade 5	10	No	2.67	2.82	2.58	3.36	3.36	3	2.83	5.13	4	3.21053	1.25	2	1	1.33333	2
1454	Female	Grade 5	9	No										2.94737	1.5	2.1		1.5	2.83333
1455	Female	Grade 5	10	No	3.58	3.36	3.17	2.64	4	2.75	2.75	4.63	4	3.52632	1	2.2	2.2	1	2.66667
1456	Female	Grade 5	11	No	2.33	2.82	2.67	2.36	3.27	2.17	2.17	3.88	4	2.68421	1.58333	2.3	1.2	1.66667	3
1457	Female	Grade 5	10	No	2.25	3.55	3.92	2.82	2.82	2.08	2.25	4.38	3.4	3.26316	1.16667	2	1.2	1.5	2
1458	Female	Grade 5	11	No	2.92	2.45	3.58	2.82	2.91	3	2.08	4.75	4.6	3.05263	1	1.9	2.4	1.16667	2.66667
1459	Female	Grade 5	10	No	4.17	3.45	2.08	2.82	4.27	3.58	3.42	5	4.4	2.68421	1.25	1.2	1.4	2	2.66667
1460	Female	Grade 5	10	No	2.92	3.36	2.67	2.36	3.36	3.17	3.25	4.63	3.9		1.25	1.3	1.4	1.5	2
1461	Female	Grade 5	10	No	2.75	2.73	3.67	3.55	3.09	2.58	3	3	3.2	2.15789	1.66667	1.9	2.4	1.5	2.5
1462	Female	Grade 5	10	No	3.67	4.18	4	3.36	4.45	3.42	3.92	3.88	4.4	3.57895	1	2.3	2.8	1.16667	1.83333
1463	Female	Grade 5	10	No	2.67	3.36	3.58	2.82	2.91	3.75	3.67	4.38	4.3	2.21053	1.25	1.2	1.8	1	2.33333
1464	Female	Grade 5	10	No	2.17	2.73	4	2.45	1.73	2.25	1.92	4.38	3.7	3.42105	1.25	2.5	1	1.5	2.66667
1465	Female	Grade 5	10	No	2.5	2.55	3.67	2.09	2.36	2.92	1.67	4.88	4.1	3.47368	1.33333	2.3	2.4	1.16667	2
1466	Female	Grade 5	10	No	1.83	3.27	3.75	2.09	2.64	2.08	2.25	4.88	4.3	2.94737	1.25	1.5	1.8	1.66667	2
1467	Female	Grade 5	11	No	2.67	3.09	3.83	2.82	2.64	3.92	2.58	4	3.5	3.15789	1.33333	2.4	3.4	1.16667	2.16667
1468	Female	Grade 5	10	No	2.33	3.45	3.17	3.09	2.45	3	2.92	3.38	3.3	1.42105	1.25	1.4	1	1.16667	1.33333
1469	Female	Grade 5	10	No	2.08	2.64	3.5	3.73	1.73	3.25	1.92	4	3.7	2.89474	1.25	2.3	1.8	2	2.66667
1470	Female	Grade 5	10	No	3.67	3.55	3.42	3.45	3.91	3.5	3.58	3.63	4.1	2.73684	1.16667	1.6	1.6	1.33333	2.16667
1471	Female	Grade 5	10	No	4.25	3.73	4.17	4	3.64	3.5	4.08	4.5	2.5	3.57895	1	1.9	2.8	1	2.5
1472	Male	Grade 5	10	No	4.08	4.64	2.5	2.55	3.73	3.17	2.42	5.63	2.7	2.36842	2.33333		1.4	2.16667	2.33333
1473	Male	Grade 5	10	No	3.58	3.18	2.58	2.64	3.27	2.75	3	4.75	4.3	3.57895	1.16667	2.8	1.4	2.33333	3
1474	Male	Grade 5	10	No	3.25	3.36	2.58	2.45	2.91	2.67	2.92	4	3.6	2.89474	2.25	1.9	3.2	1.5	3
1475	Male	Grade 5	10	No	2.42	2.64	3	2.36	1.73	2.08	1.58	3.13	2.3	2.84211	1	2.2	1.2	1.33333	2.83333
1476	Male	Grade 5	10	No	3.58	3	4.58	3.55	3.09	3.75	3.83	4	2.7		3.66667			3	3.83333
1477	Male	Grade 5	10	No	3.25	3.55	2.83	2.82	3.09	3.5	2.92	4.75	3		3	3.1	3.6	2.83333	3.33333
1478	Male	Grade 5	10	No	2.33	2.55	2.92	2.73	2.18	2	1.75	3.75	3.9	2.21053		2.1	2	2.33333	1.66667
1479	Male	Grade 5	10	No	2.67	2.18	4.58	2	1.18	3.33	2.92	4.13	2.7	2.36842	1.16667	1.9	2.2	1.5	2.83333
1480	Male	Grade 5	11	No	1.67	2.82	3.67	3	1.27	2.42	2.25	3	1.7	1.57895	1.16667	1.3	1.8	1.16667	1.16667
1481	Male	Grade 5	10	No	3.42	3.36	3.17	3.09	2.27	3.17	3.58	3.5	2.1		1.66667	1.7		1.66667	2.33333
1482	Male	Grade 5	9	No	3.67	3.36	4.42	3.27	3.27	3.33	2.92	3.88	3.3	2.52632	1.25		1.6	1
1483	Male	Grade 5	10	No	1.5	2.18	3.42	1.82	3	2.67	1.75	5	4.7	3.05263	1.83333	1.7	1.8	1.5	2.16667
1484	Male	Grade 5	9	No	2.5	3	4.08	4.27	1.91	3.17	2.42	2.63	1	2.15789	1.83333	1.6	1.2	2	2.16667
1485	Male	Grade 5	10	No	2.58	2.82	3.75	3	2.73	3.17	2	3.5	3.4	2.78947	1.41667	1.4	2.4	1.33333	2.33333
1486	Male	Grade 5	10	No	3	3.64	4.25	3.73	3.18	4.17	3.08	3.13	3.4	2.94737	2.25	3		2.5	2.16667
1487	Male	Grade 5	10	No	4.5	3.91	2.92	2.73	4.36	2.08	3.08	4.5	3.4	2.57895	2	2.3	2	2	2
1488	Male	Grade 5	10	No	2.42	2	2.5	1.55	2.27	1.58	2.08	4.5	3	2	1.75	1.8	2	1.5	2.16667
1489	Male	Grade 5	11	No
1490	Male	Grade 5	9	No	2.17	2.18	2.92	1.73	2.82	1.92	1.5	4.38	4.5	2.78947	1	1.5	3.2	1	1.66667
1491	Male	Grade 5	11	No	3.08	2.64	3.92	3.55	3.27	3.58	2.42	4.25	2.7		1.91667		2	2	2
1492	Male	Grade 5	11	No	3.08	2.82	3.75	3.64	3.36	3.42	2.75	4.25	2.6	3.31579	1.25	2.5	2.4	1.83333	2
1493	Male	Grade 5	10	No	3.42	3.18	2.75	2.55	3.27	2.92	3.17	4.38	4.6		1.58333	1.8	1	1.33333	2.66667
1494	Male	Grade 5	10	No	3	3.45	4.25	3.64	3.18	4.17	2.83	3.5	3.5		1.33333	1.6		1.83333
1495	Male	Grade 5	10	No	3.42	2.91	2.92	3.91	2.64	3.83	3.67	4	2.8	2.21053	1.33333	2	1.2	1	1.66667
1496	Male	Grade 5	10	No											2	2	2	1.83333	2.66667
1497	Male	Grade 5	10	No	3.58	3.45	3.33	3.18	2.91	3.08	3.33	3.63	3.9	2.94737	2.58333	2.8	3	3	3.16667
1498	Male	Grade 5	10	No	3.58	3.55	3.58	3.91	3.36	3.5	3.42	3.75	2.9
1499	Male	Grade 5	10	No	3	3.27	3.42	3.09	3.27	2.42	2.42	3.88	3.6	1.52632	2.16667	1.8	1.8	1.66667	1.16667
1500	Male	Grade 5	10	No	3.17	3.18	4.5	3.09	3.45	4.17	2.75	3.75	3.1	3.21053	1.41667	1.8	1.6	1.16667	1.33333
1501	Female	Grade 5	10	No										3.15789	1.5	2.5	2.2	1.16667	3.16667
1502	Female	Grade 5	10	No	2.67	2.91	2.92	2.45	1.73	3.25	2.25	1.63	2.5	2.63158		1.3	1.6	1	1.83333
1503	Female	Grade 5	10	No	3.75	2.36	3.33	4.18	3.64	3.17	3.58	3.25	3.7	2.57895	1.75	1.4	1	2	2
1504	Female	Grade 5	9	No	2.58	3	3.25	2.09	3.27	3.17	2.83	3.88	3.9	1.94737	1.75	1.8	1.2	1.5	2.33333
1505	Female	Grade 5	10	No	4	3.55	3.83	2.91	4.27	3.25	4.25	3.75	4.6	2.15789	1.66667	2	2.2	1.83333	2
1506	Female	Grade 5	10	No	1.75	2.55	2.58	2.36	2	3.08	1.75	4.38	2.3	2.73684	1.33333	1.9	1.6	2.5	3.5
1507	Female	Grade 5	10	No	2.5	3.27	3.08	2.27	2	2.75	1.83	4	3.8	2.31579	1.83333	1.7	2.8	1.16667	1.66667
1508	Female	Grade 5	10	No	1.58	2.09	2.42	1.45	2.09	2	1.08	3.88	3.8	3.10526	1.25	1.9	2	1.66667	2.16667
1509	Female	Grade 5	10	No	2.17	1.91	3.42	1.91	1.82	2.67	2	3.75	3.3		1.58333		1	1.33333	1.33333
1510	Female	Grade 5	10	No	3.75	3.45	3.5	2.82	4	3.5	3.42	3.25	3.8	2.63158	1.41667	1.8			1.83333
1511	Female	Grade 5	10	No	2.25	2.09	3.83	1.73	2.45	2.75	2.17	3.38	2.8		1.33333	1.9	2.6	1.16667	2.33333
1512	Female	Grade 5	11	No	1.75	2.45	3.33	2.91	3.64	2.42	1.42	3.38	3.6	2.63158	1.33333	1.8	1.4	1.16667	2
1513	Female	Grade 5	10	No	3.58	3.45	3	3.73	3.45	2.83	2.92	3.25	3.6		2.66667	2.2	2.6	2	3.33333
1514	Female	Grade 5	11	No	3.5	3.18	2.83	2.18	3.64	2.67	3	4	4.4	1.78947	1.33333	1.2	2.6	1	1.5
1515	Female	Grade 5	10	No	3.5	3.18	3.5	3.09	3.82	2.75	3.17	3.75	3.9	3	1.33333	2.4	1.6	1.5	1.83333
1516	Female	Grade 5	10	No	2.5	2.73	2.67	2.64	3.45	2.5	2.67	5.38	2.7		1.08333	2.2	1.6
1517	Female	Grade 5	10	No	2.08	3.27	2.92	3.55	3.36	3.08	3.5	3.5	3.6	2		1.7	1.6	2.33333	2.66667
1518	Female	Grade 5	10	No	3.58	3.45	3.67	3.64	3.36	3.58	3.75	4	3.7	2.21053	1.33333	2.3	2.4	1.16667	2.16667
1519	Female	Grade 5	10	No	2.17	2.82	4.17	1.27	3.91	1.67	2	3.38	3.2	2.89474		2	2.4	1	2.33333
1520	Female	Grade 5	10	No	2.58	2.55	3.17	2.18	4.45	3.42	2.33	4.63	5.2	2.78947	1.16667	1.5	1.6	1.83333	3.33333
1521	Female	Grade 5	10	No	1.42	2.45	3.58	1.45	1.45	2.75	1.5	3.63	2.4	3.15789	1.25	1.8	2.2	1	2.5
1522	Female	Grade 5	10	No	2.75	3.73	3.58	3.91	3.18	4.08	3.58	2.25	3.7
1523	Female	Grade 5	10	No	3.42	3.45	4.17	3.45	3	2.42	4	3.88	3.7	2.21053	1	1.3	1	1	1
1524	Female	Grade 5	10	No	2.67	3.82	2.83	3.36	3.73	3	3.25	3.75	5	3.57895	2	2.1	3.4	2	2.83333
1525	Female	Grade 5	10	No	2.58	2.82	3.25	3.55	2.73	3.25	2.75	3.75	2.8	2.21053	1.58333	1.4	1.4	1.5	1.83333
1526	Female	Grade 5	10	No	2.42	3	3.75	3.55	1.73	2.92	1.83	4.13	2.2	2.31579	2.08333	2.1	1.2	1.5	2.66667
1527	Male	Grade 5	10	No	3.25	3.18	3.75	2.91	3.73	3.75	3.25	5.13	3.8		1.66667	1.9	2.4	2	3
1528	Male	Grade 5	10	No	3.92	3.18	3.83	3.64	4.36	3.42	3.08	4.75	4.8	3.31579	1	2.2	2.2	1.5	2.33333
1529	Male	Grade 5	10	No	2.83	2.64	2.83	2.36	2.45	2.17	1.92	3.75	3.4	3.52632	1.08333	2	2.4	1.5	2.16667
1530	Male	Grade 5	10	No	3.5	3.55	3.42	3.64	3.82	3.17	3.58	3.13	3.1	2.31579	2.41667	1.4	2.4	1.83333	2.5
1531	Male	Grade 5	10	No										2.47368	2.33333	2	2	2.16667	2.66667
1532	Male	Grade 5	10	No	3.42	2.27	3.17	2.64	3	2.17	2.92	4.38	4.8	3.52632	1.16667	2.4		1.16667	2.16667
1533	Male	Grade 5	11	No	2.58	2.55	2.42	2.73	1.64	3.33	2.5	3.5	2.8	2.78947	1.25	2.1	1.8	1	2.16667
1534	Male	Grade 5	9	No	3.75	3.09	3	3.18	3.45	2.67	2.67	3.75	3.7	1.89474	3.66667	2.3	1.4	2	2.5
1535	Male	Grade 5	10	No	4	3.64	2.42	3	4.64	3.08	4.08	4.25	4	2.63158	2.16667	1.8		1.83333	2.5
1536	Male	Grade 5	10	No	2.25	2.64	3.5	2.64	1.73	3	2.33	3.5	2.2	1.68421	1.25	1.4		1.16667	1.66667
1537	Male	Grade 5	10	No	2.67	2.64	3.83	2.73	2.91	2.92	2.83	4	3.7	3.05263		2.2	3.6	2.5	3.16667
1538	Male	Grade 5	12	No	2.75	2.64	3.33	3	2.64	3.08	2.58	3.63	2.4	3.15789	1.16667	2	2.8	1	2
1539	Male	Grade 5	10	No	2.67	2.82	3.5	2.82	3.55	3	2.25	4.13	4.5	2.78947	1	1.5	2.2	1.33333	2.83333
1540	Male	Grade 5	12	No	3.17	3.09	3.33	3.73	3	3.67	3.42	3.13	2.9	2	2	2.2	2.2	2	2.5
1541	Male	Grade 5	10	No	3.25	3.73	3.67	3	2.45	3.17	3.25	3.75	2.5	2.94737	1.41667	2.7		1.5	2.16667
1542	Male	Grade 5	10	No	3	2.73	3.33	3	1.82	2.33	2.25	4.25	2.9	2.15789	1.58333	1.8	2.2	1.83333	2.33333
1543	Male	Grade 5	10	No	2	2.36	3.5	2.36	2	3	1.92	3	2.9	2.89474	1.33333	2	2.8	1.5	2.16667
1544	Male	Grade 5	10	No	1.75	2.45	2.83	1.82	2.27	2.25	2	4.57	2.7	2.36842	1.66667	2.5	2.2	2	3.5
1545	Male	Grade 5	10	No	4.17	3.55	3	3.73	3.82	3.42	4.17	3.38	3	2.42105	2.5	2.8	3.2	1.66667	3.33333
1546	Male	Grade 5	10	No	3	2.64	3.08	3.18	2.91	2.58	2.17	4.5	4.1	1.94737	1.66667	1.6	1.8	1.5	2.33333
1547	Male	Grade 5	10	No	3.33	3.27	2.92	3	3.55	2.83	3.75	4.63	2.9	2.47368	1.5		2.2	1.66667	2.66667
1548	Male	Grade 5	10	No	1.58	2.36	3.67	2	1.64	2.83	2.25	3.63	3.7	2.63158	1.41667	1.6		1.33333	1.33333
1549	Male	Grade 5	10	No	2.75	3.36	2.75	3.36	2.27	3.83	3.08	3.88	3.5	2.21053	1.33333	1.7	2.4	1.33333	1.83333
1550	Male	Grade 5	10	No	3.92	3.09	3.5	3	4.64	3.08	2.67	4.5	4.9	2.94737	1	1.7		1
1551	Male	Grade 5	10	No	4.25	4.45	3.67	3.55	4.73	4	3.75	3	3.2	2.63158	3.33333	2.7		2.66667	3.16667
1552	Male	Grade 5	10	No	3.58	3.27	2.42	2.45	3.45	2.58	2.83	4	3.7	2.31579	2.25	2	2.2	2.66667	2.33333
1553	Male	Grade 5	10	No	3.92	3.36	3.25	3.45	3.82	3.67	3.42	4.13	3.1	2.63158	1.33333	2.4		1.16667	2.33333
1554	Male	Grade 5	10	No	1.83	1.91	2.83	1.91	2.45	1.92	1.17	4.88	4.1	2.63158	1.25	2.4	2.6	1.5	2.83333
1555	Male	Grade 5	10	No	2.08	1.91	3.17	2.45	3.55	1.83	2.42	4.13	3.7	3.47368	2.25	2.8	2.8	2	3.5
1556	Female	Grade 5	10	No	3.33	3.55	4	3.36	3.55	3.25	3.33	3.75	3.8	1.73684	1.5	1.7	2	1	1.83333
1557	Female	Grade 5	10	No	2.92	3.27	2.75	2.73	3	3.33	3.42	3.38	3.5	2.26316	2.91667	3.2	2	2.16667	3.33333
1558	Female	Grade 5	9	No	3.58	3	3.67	3.45	3.45	3.67	3.5	3.75	2.1	2.05263	2	1.7	2.4	1.83333	2.16667
1559	Female	Grade 5	10	No	2.83	2.91	3.58	2.64	2.73	3.25	2.92	2.75	3	3.21053	1.25	2.7	3	1	2.83333
1560	Female	Grade 5	10	No	2.58	3.27	3.83	3.09	2.55	3.17	3.42	3	3	3.47368	1.25	1.6	2.6	1.5	2.5
1561	Female	Grade 5	10	No	4.42	3.36	3.17	3.82	3.55	2.92	4.17	4.38	3.8	3.42105	1.16667	1.8	1.4	1	1.5
1562	Female	Grade 5	10	No	2.33	2.09	2.83	3.09	2.45	2.92	2.83	4.38	3.7	2.21053	2.25	1.8		2	3
1563	Female	Grade 5	10	No	2.33	3.27	3.42	2.82	3.27	3	2.67	3.5	3.9	2.47368	1.25	1.7		1.16667	1.66667
1564	Female	Grade 5	10	No	2.92	2.91	2.75	2.27	3.36	2.92	2.42	3.88	3.9		2.66667	2.5	2.6	1.83333	3
1565	Female	Grade 5	11	No	2.75	3.27	3.75	3	3.73	2.83	2.17	5	3.9	2.36842	2.5	2.1	2	2.16667	2
1566	Female	Grade 5	10	No	1.92	1.82	4	2.27	2	2.42	1.58	4.25	2.7	3.47368	1.16667	2.6	2.4	1.5	2.66667
1567	Female	Grade 5	11	No	2.25	3	3.75	3.55	1.73	2.92	1.83	4.13	2.2	2.21053	1.41667	2.2	2.6	1.16667	1.83333
1568	Female	Grade 5	11	No	3.67	4	3.58	3.27	3.64	4.08	2.75	3.13	4	2.31579	1.41667	1.5	2.4	1.83333	2.83333
1569	Female	Grade 5	10	No	2.92	3.55	4.25	2.45	1.73	2.5	3.17	3	2.6	2.94737	2.08333	2.7		2.83333	3.5
1570	Female	Grade 5	10	No	1.92	3.18	3.08	3.18	2.45	3	3.08	3.13	2.8	2.26316	1.25	1.7	1.2	1.33333	2.66667
1571	Female	Grade 5	10	No	3.42	3.45	3	2.36	3.18	3.08	2.42	4.5	3.3	2.36842	2.5	2.2	1.4	1.66667	1.66667
1572	Female	Grade 5	10	No	3.75	4.55	2.83	3.36	3.73	3.5	4.25	4	2.6	2.84211	1.16667	2.2	1	1.16667	2.16667
1573	Female	Grade 5	11	No	2.58	2.45	3.58	2	1.55	3.92	2.58	4.5	3.5	1.52632	2.08333	1.8	1.6	1.66667	1.66667
1574	Female	Grade 5	10	No	1.67	3.09	3.67	2.18	2.82	2.5	1.92	3.88	5.4	2.78947	1.08333	2.6	2.6	1.33333	2.83333
1575	Female	Grade 5	10	No	3.33	3.36	3.25	4	3.09	3.08	2.17	3.75	3.5	2.21053	1.33333	1.7		1.33333	2.16667
1576	Female	Grade 5	10	No	3.92	3.36	3.92	3.45	3.55	3.42	4	3.25	3.7	2.10526	1.08333	1.8	1.4	1	2.33333
1577	Female	Grade 5	9	No	2.75	4.18	3.75	2.82	2.55	2.33	1.67	4.38	2.8	2	1.5	1.4		1.33333	2.33333
1578	Female	Grade 5	10	No	3.33	3.36	3.83	3.36	3.55	3.33	3.42	3.75	3.8	2.73684	2.5	2.3	3.2	2.5	3.16667
1579	Male	Grade 5	10	No	2.83	2.82	2.67	2.64	2.82	2.17	2.42	3.5	3.2		1	1.6		1
1580	Male	Grade 5	10	No	4	3.27	3.25	2.73	3	3.67	3.5	3	2.1	3.31579	1.41667			1.66667	2.33333
1581	Male	Grade 5	10	No	2	2.91	3.67	2.73	3	1.67	1.92	4.25	3.9		1.66667	1.7	2	1.83333	2.5
1582	Male	Grade 5	10	No	3.08	3.82	3.17	2.73	3.45	3.58	3.17	3.75	4.4	2.15789	3.08333	2.1	2.8	1.66667	3
1583	Male	Grade 5	11	No	4.17	4	4.08	3.55	3.91	4.25	3.92	4.25	3.7	2.36842	1.91667	1.7	2.2	2.66667	2.5
1584	Male	Grade 5	10	No										2.94737	2.66667	2.6	3.6	3	3
1585	Male	Grade 5	11	No	3.33	3.18	3.25	3.36	3.27	3.33	3	3.38	2.7	2.73684	2.5	2.7		2.83333	3
1586	Male	Grade 5	10	No	2.42	2.73	3.58	2.64	2.09	3	2.75	4.38	2.8	3.31579	1.16667	2	1.2	1.16667	1.83333
1587	Male	Grade 5	10	No	1.33	2.64	2.17	1.73	1.64	2	1.42	3.88	3	3.10526	1.16667	1.8		1.16667	1.5
1588	Male	Grade 5	11	No	1.92	2.45	3.25	2.36	2.36	2.58	2	3.38	2.4	1.94737	1	1.4	1.8	1	1.33333
1589	Male	Grade 5	11	No	2.67	2.55	3.42	2.91	3.09	2.5	2.5	4	4.6	2.36842	2.25	2.1	2	1.83333	2.66667
1590	Male	Grade 5	10	No	3.17	2.27	3.67	2.91	3.73	2.92	2.83	3.5	3.2	1.15789	1	1	1	1	1.33333
1591	Male	Grade 5	10	No	3.5	2.82	3.67	3.09	4.27	3.08	2	3.63	4.5
1592	Male	Grade 5	11	No	3.17	3.45	2.25	2.73	3.18	2.67	2.33	4.5	3.4	3.05263	2	1.9	1.4	2.33333	2.83333
1593	Male	Grade 5	11	No	3.17	4.27	2.58	3.91	3.91	3.5	3.83	3.88	3.6	3.10526	3.08333	3	2.6	2.83333	3
1594	Male	Grade 5	11	No	3.33	3.09	3.75	3.45	3.27	3.58	3.08	3	3.1	2.89474	1.16667	2.6	2.6	1.83333	2.66667
1595	Male	Grade 5	10	No	3.25	3.36	3.5	3.91	2.55	3.5	3.5	2.75	2
1596	Male	Grade 5	11	No	3	2.36	2.92	2.91	2.73	2.25	2.67	4.13	3.2	2.68421	1.16667			1.33333	1.5
1597	Male	Grade 5	10	No										3.57895	3	3			3
1598	Male	Grade 5	10	No	3.58	3.45	3.67	4	4.64	3.25	2.25	4.75	4.5	2.68421	1.58333	2.2	1.8	1.66667	2.5
1599	Male	Grade 5	11	No	3.17	2.27	3.75	2.91	3.73	2.92	2.83	3.5	3.2	2.52632	1.25	1.6	1.8	1.66667	2.16667
1600	Male	Grade 5	10	No	3.5	2.82	3.5	2.91	4.73	2.83	1.67	4.13	3.2	2.42105	1.08333	1.8	2.8	1.33333	2.16667
1601	Male	Grade 5	10	No	2.83	2.55	4.25	1.91	3.91	1.75	2.58	3.88	4.1	2.26316	1.58333	2.2	1.6	2.83333	3.5
1602	Male	Grade 5	10	No										2.36842	1.08333	1.7	2.2	1.66667	1.66667
1603	Male	Grade 5	11	No
1604	Male	Grade 5	10	No										2.52632	2.25	2.2	1.8	2.16667	2.83333
1605	Male	Grade 5	10	No	2.58	2.36	2.92	2.09	2.64	1.33	2.58	4.5	3.4	2.94737	1.25	1.9	2.2	1.66667	1.66667
1606	Female	Grade 5	10	No	2.5	3.27	3.58	3.82	3.36	3.08	2.5	3.88	3.9	2.31579		1.7		1.66667	2.16667
1607	Female	Grade 5	10	No	1.33	2.45	3.25	2.82	2.55	2.25	1.75	1.63	2.9	3.21053	1.25	1.2	1.4	1.5	2.66667
1608	Female	Grade 5	10	No	2.75	2.73	3.83	3.09	2.18	2.42	3	3.25	3.3	2.57895	1.16667	1.7	2.2	1.16667	2.33333
1609	Female	Grade 5	10	No	2.25	3	3.33	3	2.18	2.25	2.92	2.38	2.4	2.42105	1.33333	1.9	2.2	1.16667	2.33333
1610	Female	Grade 5	11	No	1.75	1.73	2.67	1.36	1.82	1.17	1.17	4.25	3.6	2.47368	2.5	2.1	1.2	2.16667	1.83333
1611	Female	Grade 5	9	No	3.33	3.09	3.5	3.18	3.55	3.58	3.17	3.75	3.8		1	1.8	1.4	1.33333	1.83333
1612	Female	Grade 5	11	No	2.58	3	3.08	3.09	2.64	3.08	2.58	3.13	3.7	1.78947		2.1	1.2	1.33333	2.5
1613	Female	Grade 5	10	No	2.67	3.09	3.17	4.09	2	3.08	3.42	2.5	1.8	2.57895	1.33333	1.3	1.2	1	1.33333
1614	Female	Grade 5	10	No	1.58	2.91	2.92	2.82	2.09	2.92	2	3	2.8	3.10526	1.33333	2.2	2.2	2	2.66667
1615	Female	Grade 5	9	No	3.08	2.82	3.67	2.82	3.55	3.08	3.25	5.25	4.3	2.47368	1.25	1.9	1.2	1.66667	2.5
1616	Female	Grade 5	10	No	2.5	2.91	3.58	3.36	3.27	3.42	3.58	5.25	3.7	3	1	1.7	1.6	1	1.5
1617	Female	Grade 5	10	No	2.42	3.55	2.42	2.64	2.64	2.83	3.17	3.5	3.5	2.36842	1.83333	2.1	2.2	1.33333	2.5
1618	Female	Grade 5	11	No	3	3.18	3.58	4.18	1.91	3.42	3.17	2.38	1.4	2.52632	2.41667	2.2	1.4	2.83333	1.83333
1619	Female	Grade 5	10	No	2.42	2.09	3	3.36	2	2.42	1.25	3	2.8	3.10526	1.08333	2.2	1.2	1.16667	1.83333
1620	Female	Grade 5	10	No	2.33	2.18	4	2.73	1.73	2.33	1.92	4.25	3.4	2.89474	1.83333	2.9	1	2	2.66667
1621	Female	Grade 5	10	No	2.92	2.36	2.08	1.82	3	2.25	2.75	4.25	3.7	2.57895	1.25	1.2	1.4	1.16667	2
1622	Female	Grade 5	11	No	3.25	3.36	3.42	3.55	3.09	3.42	3.58	3.13	2.9	2.15789	1.5	2.1	2.4	2.33333	3
1623	Female	Grade 5	9	No	3.08	2.82	4.5	2.27	3.18	3.67	3.42	4.25	4.1	2.42105	1.25	2.3		1.66667	1.83333
1624	Female	Grade 5	10	No	2.25	2.55	2.42	2.09	2.64	1.58	2.5	4.13	2.5	2.78947	1.16667	2.4	2	1.5	1.66667
1625	Female	Grade 5	11	No	2.42	2.73	4.75	3.09	2.82	3.5	2.92	3.88	4.3	2.78947	1.33333	1.9	1.4	1.33333	2.33333
1626	Female	Grade 5	10	No	3.08	2.73	3.33	3.18	3.55	2.33	2.42	3.75	3.9	3.52632	1.5	1.8	1.8	1.5	2
1627	Female	Grade 5	10	No	1.5	1.27	3.67	2.45	2.18	2.25	2.08	2.38	2.1	2.73684	1.08333	1.7	1.2	1	1
1628	Female	Grade 5	9	No	2.83	2.73	3.67	2.27	2.82	3.17	2.92	5.25	4.1	1.84211	2.75	1.8	1.2	1.5	1.83333
1629	Female	Grade 5	10	No	2.08	2.18	2.92	2.82	2.82	1.67	1.42	4	3.9	1.47368	1.91667	1.9		2.16667	2
1630	Female	Grade 5	10	No	2.67	3	2.75	2.45	3.18	2.42	2.92	4.5	3.5	2.42105	1.33333	1.8	1.8	1.33333	2
1631	Female	Grade 5	10	No	1.83	2	3.33	2.45	1.73	2.17	1.92	3.63	3.2	2.78947	1.08333	1.9	1.6	1.16667	1.83333
1632	Female	Grade 5	9	No	1.67	1.73	2.58	1.36	1.82	1.25	1.17	4.25	4	2.73684	1.08333	1.4	1.2	1	2
1633	Female	Grade 5	11	No	3.92	3.64	3.08	3.64	4.82	3.83	3.75	4.75	4	2.10526	1.33333	1.3	1.6	2.5	1.5
1634	Male	Grade 4	9	No	4.33	3.91	3.17	3.09	3.73	3.5	3.67	4.13	4.2	2.47368	1.25	1.8	2	1.16667	2.33333
1635	Male	Grade 4	9	No	3.33	3.18	2.92	2.91	4.09	3.67	2.92	5.13	4.1		1.66667	1.8		2.33333	2.5
1636	Male	Grade 4	9	No	2.83	2.64	3.33	2.27	2.45	2.25	2.17	2.75	2	2.05263	1.33333	1.6	2.2	1.66667
1637	Male	Grade 4	9	No	1.75	2.73	3.42	1.09	2.45	2.5	1.92	3.5	3.3	2.26316	1.16667	2.2	1.6	1.33333	2.33333
1638	Male	Grade 4	9	No	2.17	2.82	3.67	2.18	2.91	3.25	1.83	4	4	3.10526	1.16667	1.9		1.33333	2.5
1639	Male	Grade 4	9	No	1.92	1.64	4	1.27	3	2.08	1.67	3.25	2.5	3.05263	1.41667	1.8		1.33333	2.16667
1640	Male	Grade 4	9	No	3	2.64	3.08	2.73	3.45	2.17	2.75	4.25	3.4	2.63158	1.08333	1.8		1.16667	2.66667
1641	Male	Grade 4	9	No	3	2.91	3.42	3.91	2.55	2.75	2.5	3.75	3.6	2.89474	1.75	2		1.33333	2.33333
1642	Male	Grade 4	9	No	4.33	3.55	3.33	3.09	3.91	3.25	3.5	4.63	3.9	2.73684	2.75	2.8	2	2.16667	2.66667
1643	Male	Grade 4	9	No	4.67	4.27	3.83	3.45	3.55	3.42	4.5	4.5	3.1	2.26316	2.33333	2.7	2.8	2.5	2.33333
1644	Male	Grade 4	9	No	3.67	3.18	3.25	2.27	2.91	2.75	2.75	4.88	5.2	3.78947	1.33333	2.6		1.83333	2.16667
1645	Male	Grade 4	9	No	3.75	4	2.92	3.09	4	2.75	3.25	4.88	4.5	3.47368		2.7	1.6	1.16667
1646	Male	Grade 4	9	No	3.75	3.36	3	3.91	4.45	3.25	3.42	4.38	3.6	1.78947	1.83333	1.7	1.6	1.33333	2.33333
1647	Male	Grade 4	9	No	2.92	3.36	4.58	2.64	3.91	2	2	5.25	4.8	2.68421	1.66667	1.9	2.4	2	2.16667
1648	Male	Grade 4	9	No	4.25	3.45	3.67	3.55	3.36	3.08	4	4.38	2.8			1.8		1.16667	2.83333
1649	Male	Grade 4	9	No	3.83	3.91	4.5	3	2.55	2.92	3.17	4.5	3.7	3	1.58333	2.6		1.5	2.5
1650	Male	Grade 4	9	No	3.08	2.91	3.25	2.18	1.64	3.08	3.42	4.13	3.5	3.36842	1.83333	3.1	2	2	2.33333
1651	Male	Grade 4	10	No	2.83	2.73	2.75	2.27	2.82	2.25	2.08	4.13	2.4	3.42105	1.08333	2.7	1.6	1	2.5
1652	Male	Grade 4	9	No	2.83	3.18	3.58	2.82	3.55	2.92	3.92	4.25	3.8	2.21053	1.33333	2.3	2	1.66667	1.66667
1653	Male	Grade 4	9	No	3.08	2.27	1.92	2	3.55	1.83	1.17	4	3.8	1.78947	3.25	3.1		2.66667	3.16667
1654	Male	Grade 4	9	No	3.25	3.27	3.83	4.09	3	4.08	3.17	2.5	3.5	1.89474	2.33333	2.2	2.2	1	2.5
1655	Male	Grade 4	9	No	3.92	3.45	3.17	2.91	3.82	3.08	3.5	3.88	3.9	2.47368	1.16667	2.1		1	1.33333
1656	Male	Grade 4	9	No	4	3	2.17	2.36	3.36	2.17	2.58	4.88	3.3	3.57895	1	1.3		1	1.83333
1657	Male	Grade 4	9	No	4.08	3.45	4	2.91	4.27	3.33	3.58	4	4.1	1.47368	1.41667	1.3	1.6	1.66667	2
1658	Male	Grade 4	10	No											1.75	2.1		2.16667	2.33333
1659	Male	Grade 4	8	No	2.08	3	3.5	2.91	2.36	2.08	2.92	4.13	4.5	1.94737	1	1.4		1	1.16667
1660	Male	Grade 4	9	No	3.08	3.82	3.58	2.64	3.18	3.33	3.17	5	3	3.15789	2	3.2	2.2	1.83333	2.16667
1661	Male	Grade 4	9	No	3.25	3	4.33	2.18	3.36	1.83	2.25	4.88	3.7	3	1.25	2.9	3.2	1.16667	2.33333
1662	Male	Grade 4	9	No	3.08	2.82	3.67	3.09	2.82	2.67	2.83	4.13	3.6	3.68421	1.25	2.3		1.66667	2.66667
1663	Male	Grade 4	9	No	3	3	3.83	3.18	3.45	3.58	2.58	4.5	3.7	2.68421	1.5	2.2		1.33333	2.83333
1664	Male	Grade 4	9	No	3.17	2.91	4.08	3.45	2.27	3.08	3.92	3.25	4.1	3	1.16667	1.9	3.4	1.16667	3.5
1665	Male	Grade 4	9	No	3.83	2.64	2.75	2.82	3.09	2	1.92	4.88	2.5	3.21053	1.41667	2.1		1.66667	2.16667
1666	Female	Grade 4	9	No	3.33	3	3.5	2.64	4	3.17	2.83	4.63	3.8	3.10526	1.66667	2.2		1.5	2.16667
1667	Female	Grade 4	9	No	1.58	1.64	4	1.55	2.27	1.83	1.25	4.63	3.6	2.84211	1.66667	2.4		1.16667	2.83333
1668	Female	Grade 4	8	No	1.75	2.64	2.67	3.45	1.73	1.75	1.75	4.38	2.8	3.31579	2.16667	2.1	2.8	2.5	3
1669	Female	Grade 4	9	No	2.58	3.18	3.25	2.09	3.36	2.33	2	3.88	3.2	2.42105	2.16667	2		1.83333	2.16667
1670	Female	Grade 4	8	No	2.25	2.36	3.25	2.09	2.64	2.25	2.67	3.75	4.9	3	1	1.9		1.16667	2.33333
1671	Female	Grade 4	9	No	4.25	3.18	4.33	3.55	3.55	3	3.58	4.13	3.7	3.21053	1.58333	2.3		1.16667	3
1672	Female	Grade 4	9	No										3	1.5	1.7		1.83333	2.66667
1673	Female	Grade 4	9	No	2.92	2.73	3.75	3.18	3.36	3.08	2.67	3.75	2.9	2.36842	1.33333	2.5	3	1.5	2.5
1674	Female	Grade 4	9	No	3.92	2.45	3.67	2.82	2.09	2.17	2	2.5	2.6	3.15789	1.16667	1.8		1.66667	2
1675	Female	Grade 4	9	No	2.17	2.82	2.92	3.64	3.18	3.5	2.67	4.5	3.7	2.21053	1.91667	2	2.4	2	2.5
1676	Female	Grade 4	9	No	3.17	2.82	3.42	3	3.18	3.92	3.42	4.13	3.5	2.57895	1.75	1.8	2.4	1.5	1.66667
1677	Female	Grade 4	9	No	3.42	3.45	3.58	3.09	4.45	3.25	3.17	5.38	4.3	2.15789	2.08333	2	2.4	1.5	2.33333
1678	Female	Grade 4	9	No	4	3.55	2.92	3.09	4.18	3.17	3.17	4.38	3.4	2.68421	1.16667	2		1.16667	2.33333
1679	Female	Grade 4	8	No	3.58	4.18	3.42	2.64	3.09	1.92	1.67	5	4.3	3	1.25	1.7	3.6	2	2.5
1680	Female	Grade 4	9	No	3.08	3.36	3.5	2.73	3.64	3	3.17	4.5	3.7	2.68421	1	2	1.8	1	2.33333
1681	Female	Grade 4	9	No	3.17	3.27	2.42	2.55	3.91	2.58	2.33	5	4.7	1.68421	3.33333	2.6	1.6	3.66667	2
1682	Female	Grade 4	9	No	2.5	2.73	3.25	2.55	3	2.75	2.33	3.38	3.6	2.89474	1.16667			1	2.5
1683	Female	Grade 4	9	No	2.42	2.45	3.92	3.18	2.64	2.92	1.67	3.13	1.8	3.31579	1.5	2.2	2.4	1.16667	2.33333
1684	Female	Grade 4	9	No										1.73684	1.25	1.3		1.5	1.33333
1685	Female	Grade 4	9	No	4.42	3.18	4.17	4.18	3.27	4.08	5.08	2.75	2.5	3.15789	1.16667	1.9	2.6	1.16667
1686	Female	Grade 4	8	No	3.33	4	3.5	4.18	2.64	4.25	3.83	3.5	2.2	2.89474	1.16667		2.4	1.16667	2
1687	Female	Grade 4	9	No	3.08	2.91	2.92	2.73	1.64	2.42	1.92	5.38	4.4	3.57895	1	1.5	2.2	1	2.83333
1688	Female	Grade 4	9	No	3.75	2.73	3.33	2.82	2.91	3	3.42	4.88	3.3	2.31579	1.16667	2.1		1.33333	2
1689	Female	Grade 4	10	No	3	3.09	3.17	3.09	3.73	2	2.5	5.13	3.8	3.52632	3.33333	3	3.8	2.33333	3.16667
1690	Female	Grade 4	9	No	2	3.36	3.67	2.36	2.73	2.25	2.42	4.25	4.1	2.94737	2.41667	2.7	2.8	2.5	3.66667
1691	Female	Grade 4	8	No	1.92	2.82	3.92	3.27	4.18	3.67	4.17	4.5	4.5	3.31579	1.16667	2.3	1.6	1	1.33333
1692	Female	Grade 4	9	No	2.58	1.82	3.67	2.09	2.45	2.67	1.25	4.25	3.9	3.63158	1.33333	2.4		1.16667	3
1693	Male	Grade 4	9	No	3.5	2.55	2	2.82	3.73	2.67	2.08	4.13	3.3	2.57895	1.41667	1.9		1.5	3.16667
1694	Male	Grade 4	9	No	3.58	3.91	3.83	3.82	2.91	3.42	4.08	3.5	3.6	2.73684	1.08333	2.3		1.33333	3
1695	Male	Grade 4	8	No	3.25	3.64	3	2.64	1.64	2.92	4.08	4.38	4.1	3.31579	2.41667	3.1		2.16667	2.66667
1696	Male	Grade 4	9	No	3.25	2.55	2	2.09	2.73	2.42	2.5	5.13	4	2.52632	1.41667	1.7	1.8	1.5	2.16667
1697	Male	Grade 4	9	No	3.58	2.27	2.58	2.09	3	2.17	2.42	3.5	5.2	3.15789	1.25	1.3		1	1.5
1698	Male	Grade 4	9	No										3.21053	1.33333	1.7		1.33333	2.5
1699	Male	Grade 4	9	No	4.25	3.18	3.08	2.45	2.82	2.92	2.83	3.88	4.1	3	1.16667	1.6		1	1.5
1700	Male	Grade 4	9	No	2.67	2.73	3.25	2.55	3.55	2.42	3.08	3.63	3.2	2.73684	1	1.9	1.4	1	2.5
1701	Male	Grade 4	9	No	2.5	2.45	3.92	2.73	3.36	3.17	1.83	4.75	4.5	3.26316	1.16667	1.8	2.4	1.16667	2
1702	Male	Grade 4	9	No										2.78947	2.25	2.3		2	2.33333
1703	Male	Grade 4	11	No	3.33	2.91	3.67	2.91	3.09	3.33	4	3.5	3.2		1	1.3		1	2
1704	Male	Grade 4	9	No	2.08	3.55	3.17	2.82	2.18	3	2.67	3.25	1.6	2.31579	1.58333			1.33333	2.16667
1705	Male	Grade 4	10	No	1.83	3	4.08	3.18	1.55	2.83	2	3.13	3.8	2.52632	1.66667	2.5	2.2	1.66667	2.66667
1706	Male	Grade 4	10	No	1.67	2.36	5.5	4	2.45	3.58	2.67	4.25	4.5	3.42105	1	1.7	2		2.33333
1707	Male	Grade 4	9	No	2.42	3.09	3.67	3.18	3.36	2.25	1.58	4	3.9	3.31579	1.83333	2.4		1.66667	2.66667
1708	Male	Grade 4	10	No	1.33	2.36	2.92	1.64	2.09	2.5	1.83	3.25	3.5		1.16667	1.5		1	2.5
1709	Male	Grade 4	9	No	3.25	3	3.75	3	2.91	2.67	3.25	3.75	3.2	2.57895	3.33333	2.4	1.6		2.16667
1710	Male	Grade 4	9	No	2.92	2.91	3.58	3.18	2.91	3.42	3.42	4.38	3.6	3.10526	1.08333	2.1		1.33333	1.83333
1711	Male	Grade 4	9	No										2.47368	2.91667	2.8		2.66667	2.16667
1712	Male	Grade 4	9	No	3.08	3.27	3.42	3.91	3.73	3.17	3.25	4.5	3.5	2.57895	1.33333	2.1	2.2	1.5	2.16667
1713	Male	Grade 4	10	No	3	3	3.75	3.18	3.55	2.42	3	3.75	3.5	2.94737	1.33333	1.8		1.16667	2.66667
1714	Male	Grade 4	9	No	1.83	2.73	3.08	2.82	2.27	1.58	2.58	3.25	2.6	2.89474	1.08333	1.4		1	1.66667
1715	Male	Grade 4	9	No	3.75	3.64	3.92	3.18	3.55	3.33	4	3.13	2.9	2.42105	3.5	2.3	3	2.5	3.5
1716	Male	Grade 4	9	No	2.67	2.45	2.83	2.55	4	2.33	2.25	4.88	4.1	3.05263		2.6	2.2	2	2.83333
1717	Male	Grade 4	9	No	3.58	2.91	3.17	1.82	1.91	1.33	3	4.13	3	3	1.5	1.8	2.8	1.5	2
1718	Male	Grade 4	10	No	2.25	2.73	3.25	2.82	2.91	2.83	2.58	3.5	3.4	2.73684	1.5	2	1	1.5	2
1719	Male	Grade 4	9	No	2	3.09	4.67	2	3	2.42	1.92	4.38	4	3.05263	1.75	2.2		2.16667	2.83333
1720	Male	Grade 4	9	No	5.08	3.55	3.67	3.27	5.09	3.58	4.25	5.25	4.9	2.84211	1.58333	2		1.16667	1.33333
1721	Male	Grade 4	10	No										2	1.41667	1.6	1.8	1.5	2
1722	Male	Grade 4	9	No	3.75	3.73	3.42	3.27	3.36	3.58	4.17	3.5	3.4	3.31579	1.16667	2	3.4	1.16667	2
1723	Female	Grade 4	9	No	2	2.73	2.75	3.64	2.91	2.33	1.33	3.88	2.5	2.68421	1.33333	2	2.8	1	2.16667
1724	Female	Grade 4	9	No	2.92	2.55	3.25	3.27	2.82	2.83	2.33	3.63	3.4	2.31579	1.08333	1.8		1.16667	2
1725	Female	Grade 4	9	No	1.92	2.91	3.5	3.36	3.09	3	2.5	3	4.3	1.78947	1.08333	1.4		1	1.16667
1726	Female	Grade 4	9	No										2.26316	1.33333	1.4		1.33333	2
1727	Female	Grade 4	8	No	3.58	2.09	2.08	1.55	4.36	1.75	1	4.75	4.3	2.84211	1.33333	1.9		1.5	2.16667
1728	Female	Grade 4	8	No	2.58	2.09	3.75	2	2.36	2.75	1.67	4	2.9		1	1.7	2.4	1	2.16667
1729	Female	Grade 4	9	No	3.25	3	2.83	2.73	4.27	2.83	2.5	3.25	3.7	3.10526	1.83333	2.6		1.83333	2.16667
1730	Female	Grade 4	9	No	3.25	3.27	3.25	3.09	3.09	2.67	2.5	3.5	3.7	2.21053	1.25	1.3		1	1.66667
1731	Female	Grade 4	10	No	2.33	3.36	3.25	2.64	2.91	3.42	2.25	3.88	3.5	2.42105	1.91667	1.9	1.8	1.5	2
1732	Female	Grade 4	10	No	3.17	2.27	2.5	1.64	3.64	1.92	1.83	4.25	4	3.26316	1.16667	1.7		1.16667	1.66667
1733	Female	Grade 4	9	No	2.92	3.27	3.58	2.64	2.09	2.92	2.75	2.88	2.9	2.78947	1.33333	1.9		1.33333	2
1734	Female	Grade 4	9	No	1.5	2.27	4.08	1.27	2.36	2.42	1.42	4.38	4.4	2.84211	1	1.5		1.66667	2.16667
1735	Female	Grade 4	9	No	3.58	2.91	3.08	2.36	3.91	3.42	2.75	4.5	4	3.26316	1.08333	2		1.5	1.83333
1736	Female	Grade 4	10	No	2.58	2.64	3.5	3.55	3	3.25	2.58	4.5	4	2.63158	1.25	1.7	1.8	1.33333	2.16667
1737	Female	Grade 4	8	No	3.17	4.36	3.25	3	3	3.25	2.5	4.75	3.3	2.47368	1.25	1.6	2.8	1.16667	1.66667
1738	Female	Grade 4	9	No	2.17	2.45	3.92	2.64	2.82	2.25	1.33	3.88	5.2	3.26316	1.58333	1.7	3	1.66667	2.83333
1739	Female	Grade 4	9	No	2.58	2.82	1.83	1.82	2.27	2.25	2.33	5.25	3.9	2.21053	1.25	1.7		1.33333	2.16667
1740	Female	Grade 4	9	No	2.33	2.36	3.42	2.36	2.09	2.42	2	4.75	2.5	3	1.75	2.1	2.4	1.5	2
1741	Female	Grade 4	8	No	3.5	3.27	2.67	2.18	3.27	2.58	2.33	4.13	3.5	3.10526	1	1.6	2.8	1.33333	2.33333
1742	Female	Grade 4	8	No	2.33	3.55	2.58	1.64	2.18	2.17	2.17	4.88	3.7	2.78947	1.33333	2.2	2.2	1	2.83333
1743	Female	Grade 4	9	No	1.42	2.91	3	2.55	2	1.92	2.42	4.13	3	2.21053	1.33333	2.1	1.6	1.33333	2
1744	Female	Grade 4	9	No	2.83	3.82	3.33	2.73	2.82	3.25	2	4.38	4.6	2.73684	1	1.4	3.6	1.33333	1.83333
1745	Female	Grade 4	9	No	2.25	2.73	4.33	2.18	2.82	3	2.33	4.5	3.7	2.52632	1.16667	1.7	3	1.5	2.33333
1746	Female	Grade 4	9	No	2.92	3.91	3.33	3.64	3.36	3.58	3.25	3.75	3.1	2.21053	1.41667	1.2	2	1	1.83333
1747	Female	Grade 4	10	No	1	2.64	2.75	2.55	1.09	2.42	1.75	5.13	3	2.63158	1.16667	1.6	1.4	1.33333	2.33333
1748	Female	Grade 4	8	No	1.58	3.27	2.83	2.82	2.82	3.08	1.83	2.63	5	3	1.33333	2		1.16667	2.5
1749	Female	Grade 4	9	No	2.5	3.09	3.42	3.27	2.91	3.17	2.83	4.5	2.4	2	1.16667	1.4	1.6	1.16667	1.33333
1750	Male	Grade 4	10	No	1.92	2.91	3.42	2.09	1.91	2.75	2	3.63	2.8	2.10526	1.41667	1.3	1.6	1.83333	1.33333
1751	Male	Grade 4	9	No	1.67	2.64	3.83	4.27	2.91	1.83	1.5	3.38	2.9	2.78947	1	1.5	2.2	1	2
1752	Male	Grade 4	9	No	2.58	3.36	3.92	2.36	2.82	2.33	2.33	3.5	3.4	2.10526		2.1	2.2	1.83333	2
1753	Male	Grade 4	9	No										2.26316	1.58333	1.8	2	1.66667	1.83333
1754	Male	Grade 4	9	No	2.92	3.09	3.42	3.82	2.55	2.25	3.33	3.38	2.3	3.10526	1	1.9		1	1.66667
1755	Male	Grade 4	9	No	3.42	3.91	3.25	2.73	3.09	2.08	2.92	4.38	3.1	2.78947	1.33333	1.7		1.66667	2.33333
1756	Male	Grade 4	9	No	1.17	1.91	2.17	1.73	2.27	2	1.42	4.88	3.2	3	1.25	2		1.33333	2.66667
1757	Male	Grade 4	10	No										2.89474	1.41667			1.66667	2.5
1758	Male	Grade 4	10	No	4	3.27	3.75	4	3.36	3.08	3.58	3.38	3.8	3.52632	1	1.6		1	1.5
1759	Male	Grade 4	9	No	3.33	4	4.08	2.45	2.55	2.92	3	4.88	3	2.47368	1	1.3	1.2	1	1.66667
1760	Male	Grade 4	9	No	3.08	3.64	3	4.27	3.18	3.42	3.17	3.25	3.4	2.89474				1.66667	3.16667
1761	Male	Grade 4	9	No	3.5	3.55	2.92	3	5	3.08	3.42	4.5	4	2.84211	2.91667	2		1.33333	2.83333
1762	Male	Grade 4	9	No	2.25	2.18	2.67	2	3.09	2.42	1.92	3.75	3.9	2.47368	1.41667	1.5		1.33333	2
1763	Male	Grade 4	9	No	2.25	2.91	3.25	3.36	2.09	2.58	1.58	4.75	4.1	3	1.58333	2.7		1.16667	2.5
1764	Male	Grade 4	9	No	1.92	2.64	2	2.73	2.18	1.83	1.58	4.13	3.9	2.63158	1.25	2	2.6	1.33333	2
1765	Male	Grade 4	10	No	3.08	3	4.33	1.45	2.27	2.67	2.33	3.25	3.2	3.05263	2.08333	1.9		1.66667	2.16667
1766	Male	Grade 4	10	No	3.58	4.09	3.5	3.27	3.36	3.25	4.5	3	3.3	2.68421	2.75	1.6	2	1.66667	1.83333
1767	Male	Grade 4	9	No	3	3.82	2.42	3.09	3.45	3.33	2.83	4.88	4.8	2		2.8		2.5	2.33333
1768	Male	Grade 4	9	No	2.25	2.45	4.08	2.45	2.36	2.67	2.25	4	2.8	3	1	1.7		1.16667	2.33333
1769	Male	Grade 4	9	No	2.33	3.18	3.5	3.36	2.55	3.33	2.42	4	2.3	2.68421	2.41667	2		1.16667	3
1770	Male	Grade 4	9	No	4.25	3.36	3.67	4.27	3.82	3.42	3.25	4.25	3.7	3.21053	1.83333	2.7		1.66667	2
1771	Male	Grade 4	9	No											1.83333	2.5	3.8	1	3.5
1772	Male	Grade 4	10	No	2.42	1.91	3.25	3.27	2.18	2.58	2.5	3.88	2.7	2.68421	1.83333		1.8	1.66667	2.83333
1773	Male	Grade 4	9	No	3.42	3.73	3.58	4.18	3.73	4.08	3.42	3.38	3.1	2.26316	1.83333	2.2	2	2	1.5
1774	Male	Grade 4	9	No	3.83	3.91	3.67	3.91	3.73	3.75	3.33	2.88	2.9		1	1.5	2.2	1.66667	1.5
1775	Male	Grade 4	9	No	1.92	2.64	2	2.73	2.18	1.83	1.58	4.13	3.9		1.83333	1.7	1.8	2.66667	2.5
1776	Male	Grade 4	10	No	4.25	3.18	2.67	3.18	3.91	3.42	3.25	5	3	3.68421		3		2.5	2.16667
1777	Male	Grade 4	9	No	3.33	3	2.75	2.91	3	2.83	3.75	3.63	3.7	3.36842	1.83333	2.2	1.4	1.83333	2
1778	Male	Grade 4	10	No	2.08	4.45	3.75	4	2.55	3.5	4.08	3.25	1.9
1779	Male	Grade 4	9	No	2.42	3.55	3.25	3.09	2.45	2.17	2.33	3.13	3.7	2.52632	1.33333	1.9	2	1.83333	2.16667
1780	Female	Grade 4	9	No	2.58	3.36	3.08	3.36	2.36	2	2.5	4.25	3.2	2.84211		2	2	1.66667	2.5
1781	Female	Grade 4	9	No	3.42	2.73	3.33	3.27	3.82	2.67	2.08	5.25	5.4	2.84211	1.41667	2.1		1.16667	3
1782	Female	Grade 4	9	No	2.75	2.73	3.75	2.09	3.45	2.75	1.58	4	4.2	2.78947		1.6	1.6	1.16667	3.33333
1783	Female	Grade 4	9	No	2.92	4.09	3.67	3.64	3.82	3.33	3.42	3.38	3.5	2.10526	1.75	1.5	2.2	1.66667	1.5
1784	Female	Grade 4	9	No	3.17	3.18	3.25	2.64	3.55	3	2.75	3.38	2.3	2.73684	1.08333	1.6		1.16667
1785	Female	Grade 4	10	No	3.58	4.27	1.83	3.27	3.91	2.67	3.92	5.13	3.8	2.52632	2.66667	2.3	2.4	1.33333	2.66667
1786	Female	Grade 4	9	No	1.67	2.09	2.67	4	3.27	2	1.83	4.25	2.1	1.94737	1.08333	1.5	1.6	1	1.83333
1787	Female	Grade 4	9	No	1.75	2.45	3.67	2.27	3	3.58	2.83	4.13	1.8	2.47368	1.25	1.2	1	1.16667	1.83333
1788	Female	Grade 4	9	No	3.25	3.36	3.42	3.64	3.55	3.17	3.58	4	3.7	3	1.41667	1.7		1.66667	2
1789	Female	Grade 4	9	No	1.25	1.55	4.42	1.73	1.36	2.58	1.75	3.63	3.5	2.57895	1	1.9		1	2.33333
1790	Female	Grade 4	9	No	1.92	2.64	3.42	2.27	2.55	2.67	1.75	4.75	4	2.84211	1.08333	1.9	1	1.16667	1.83333
1791	Female	Grade 4	9	No	2.25	2.91	2.83	3.27	2.64	2.08	2.58	4.13	3.1	1.89474	1.58333	1.5	2.2	1.66667	2.16667
1792	Female	Grade 4	9	No	1.92	2.45	3.5	2.73	2.09	3	2.25	3.63	2.9	2.89474	1	1.7		1	1.5
1793	Female	Grade 4	9	No	3.58	3.64	3.67	3.55	4.18	3.83	3.42	3.75	3.8	3	1.08333	1.8		1.16667	2.16667
1794	Female	Grade 4	9	No										2.36842	2.75	1.7	3	1.66667	2.83333
1795	Female	Grade 4	9	No	3	2.91	4.08	3.18	4.18	2.58	2.5	4.38	4	2.42105	1.41667	1.8	2.6	1.5	2.16667
1796	Female	Grade 4	9	No	3.08	2.91	4	2.82	3.45	2.75	2	4.88	3.8		1.33333		2.2	1.83333	1.66667
1797	Female	Grade 4	9	No	2.25	2.73	2.17	3.09	2.36	2.33	2.5	2.88	3.2	3.15789	1.33333	1.5		2	1.83333
1798	Female	Grade 4	9	No	3.42	2.82	3.5	2.64	4.55	3.08	3.92	5.25	3.2	3.47368	1.33333	2.1	1.6	1.16667	2.5
1799	Female	Grade 4	9	No	3	3.09	3.67	2.73	3.82	2.58	2.67	3.88	4.3	2.94737	1.16667	2		1	2.5
1800	Female	Grade 4	9	No	2.33	2.91	3.42	1.45	3.64	2.33	1	4.38	4.2	2.26316	1.25	1.6	1.4	1	2.16667
1801	Female	Grade 4	9	No	3.92	3.36	3.83	3.91	4	2.67	2.58	3.38	4	3.36842	1.33333	1.4	2.4	1	1.83333
1802	Female	Grade 4	9	No	3	3.09	3.67	3.82	2.91	4.42	3.25	3.38	2.7		1.83333	2.1	3	1.16667	2
1803	Female	Grade 4	9	No	2	2.45	3.58	2.27	3.45	2.25	2	4.5	4.7
1804	Female	Grade 4	9	No	2.83	3	3.67	2.55	2.82	2.33	2.42	4.38	4.1	2.21053	1.16667	1.8	1.4	1.33333	2
1805	Male	Grade 5	11	No	3.17	3.55	3.25	3.09	3.64	3.83	3.67	3.63	3.8	2.89474	1.08333	2.3		1	3.33333
1806	Male	Grade 5	10	No	3.5	3.45	4	3.36	3.18	3.58	3.67	4.13	3.4	2.26316	1.91667	2.7		2.16667	2.16667
1807	Male	Grade 5	10	No	3	2.73	1.83	2.09	1.91	2	1.75	3	2.4	3.31579	1.16667	1.8		1.5	1.83333
1808	Male	Grade 5	10	No	2.83	2.91	3.58	2.73	3.36	2.67	1.92	4	3.9	3.42105	1.16667	2.1	2.8	1.33333	2.66667
1809	Male	Grade 5	10	No										1.52632	2.33333	2	1	1.83333	2.5
1810	Male	Grade 5	10	No	2.75	3.27	3.5	2.73	2.55	2.83	2.5	3.5	3.7	3.21053	1.16667	1.7	1.2	1.16667	1.83333
1811	Male	Grade 5	10	No	3.25	3.64	2.58	1.82	2.36	2.25	2.17	4.5	4.1		1.25	1.7		1.66667	2.5
1812	Male	Grade 5	9	No	2.75	3.64	3.25	2.45	3.09	2.75	2.58	3.5	4	3.31579	1.25	2.8		1.16667	2.66667
1813	Male	Grade 5	10	No										3.05263	1.75	2.6	1.4	1.5	2.66667
1814	Male	Grade 5	10	No	3.25	2.09	2.5	2.18	2.27	3.67	2.17	4.5	2.8	3.15789	1.41667	1.9	1.6	1.33333	3
1815	Male	Grade 5	10	No	2.25	3.27	2.83	1.91	3	2.25	2.92	4.5	2.5	2.73684	2.16667	2.2			2.83333
1816	Male	Grade 5	10	No	2.17	2.82	3.5	2.82	3.27	2.92	2.25	4.63	3.4	2.42105			1.2		2.5
1817	Male	Grade 5	11	No	1.75	2.64	3	1.45	2.09	1.83	1.58	2.38	3.3		1	1.5		1.33333	1.83333
1818	Male	Grade 5	10	No	2.25	2.91	2.83	3.27	2.64	2.08	2.58	4.13	3.1	1.78947	2.16667	1.9	1.4	1.83333	2.33333
1819	Male	Grade 5	10	No	2.67	2.82	2.17	2.73	2.73	3.33	2.58	4.5	3.9	3.05263	3.08333	2.6		2.33333	3.16667
1820	Male	Grade 5	11	No	2	2.45	2.58	1.55	2.91	1.83	2	4.63	5.1	3.31579	1.33333	2.4	1.6	1.33333	2.66667
1821	Male	Grade 5	11	No	1.25	2.55	2.17	1.27	2.73	1.67	1.17	3.88	4.7	2.63158	1.08333	1.6		1	2.33333
1822	Male	Grade 5	9	No	2.17	2.09	2.83	2.64	2.09	2.42	1.5	5.13	3.9	2.26316	2.58333	2.2		3	2.83333
1823	Male	Grade 5	11	No										2.42105	1.08333	1.7	1.6	1.5	1.5
1824	Male	Grade 5	10	No	2.83	2.73	2.92	2.55	2.82	1.83	1.92	4.63	5.2	3.15789	1.25	2.5		1.83333	2.16667
1825	Male	Grade 5	11	No										2.47368	1.66667	2.4		1.66667	2.83333
1826	Male	Grade 5	11	No	2.42	2.45	3.67	3.64	3.45	2.42	3.42	4.38	2.9	2.47368		2.2		2.5	2.5
1827	Male	Grade 5	10	No	2.17	3.18	3.58	3	2.82	2.17	2.5	3.13	3.2	2.47368	1.5	1.8	2	2	2.66667
1828	Male	Grade 5	10	No	3.42	3.36	3.58	3.36	3.73	3.25	3.33	4.63	4.8	2.31579	1.83333	2	1.6	1.83333	2.16667
1829	Male	Grade 5	11	No	2.25	1.73	4.17	1.27	1.18	2	2.67	3.63	3.6	2	1.16667	1.9		1.16667	2.5
1830	Male	Grade 5	10	No	2.92	2.64	2.42	1.91	2.45	2.08	2	3.88	3.3	3.31579	1	1.9	1.4	1	2.33333
1831	Male	Grade 5	10	No	3.33	2.36	3.42	3.09	3	2.92	3.42	4.13	3.8	2.47368	1.08333	1.4	1.8	1.33333	1.83333
1832	Male	Grade 5	10	No	3.5	4	3.92	3	1.73	2.92	3.58	3.88	2.9	2.89474	1.41667	2.4	2	1.33333	2.66667
1833	Male	Grade 5	10	No	2.75	3.64	3.25	2.45	3	3.17	2.67	3.5	3.9	2.73684	1.91667	2.4	2.4	1.33333	2.83333
1834	Female	Grade 5	10	No	2.92	2.73	2.67	3.73	2.27	2.67	2.25	3.75	3	2.26316	1.08333	1.5	1	1.33333	1.5
1835	Female	Grade 5	10	No	1.83	1.73	3.08	1.91	3.55	3.25	2.42	5.38	4.8		1.08333	1.4		1.16667	1.66667
1836	Female	Grade 5	10	No	2.42	3.18	3.67	3.09	2.73	2.92	2.67	2.88	3.1	2.10526	1.25	1.9	1.6	1.5	1.83333
1837	Female	Grade 5	10	No	3.17	2.36	3.42	1.73	2.18	1.75	1.58	4.25	3.6	2.26316	1.25	1.7		1	1.66667
1838	Female	Grade 5	10	No	2.08	2.73	3.08	2.45	3.36	2.83	2	3.13	4	3.05263	1.75	2.2		1.5	2.66667
1839	Female	Grade 5	11	No										2.31579	1.25	1.7	2.4	1.16667	1.33333
1840	Female	Grade 5	9	No										3.63158	1.33333	2.5	2.2	1	3.16667
1841	Female	Grade 5	10	No	1.42	2.55	4.58	2.18	2.09	2.83	2.08	2.88	3.2	3.84211	1	1.8		1.16667	2.33333
1842	Female	Grade 5	10	No	2.58	3.36	3.67	3	3.73	3	2.25	4	3	3	1	1.7	3	1.33333	3
1843	Female	Grade 5	10	No	1.42	2.64	2.67	1.64	1.91	1.67	1.42	2.38	2.1	3.21053	1	1.2		1	1.5
1844	Female	Grade 5	10	No	3.42	2.27	2.92	3.91	3.55	2.83	2.58	3.38	3.7	3.05263	1.58333	2.2		1.66667	2.5
1845	Female	Grade 5	10	No	1.5	2.45	2.83	1.64	2.27	2	1.17	3.5	4.8	3.57895	1.5	2.7		1.5	3
1846	Female	Grade 5	10	No	2.5	3.27	3.17	2.73	2.91	2.67	2.5	4	3.7	2.68421	1.16667	1.7	1.6	1.16667	1.33333
1847	Female	Grade 5	10	No	1.5	2.09	2.92	1.64	1.18	2.17	1.92	3.25	3	2.73684	1.08333	2.1	2.8	1.16667	1.83333
1848	Female	Grade 5	10	No	3.33	3.82	3.33	3.64	3.45	3.58	3.25	2.63	2.7	2.42105	1.5	1.8	1.8	1.83333	2
1849	Female	Grade 5	10	No	1.92	2.45	3.42	1.64	1.55	2.25	2	4.5	3.5	2.73684	1	1.8	2.8	1	1.66667
1850	Female	Grade 5	10	No	3.08	2.82	2.42	2.36	3.27	3	2.33	4.5	4.2	2.10526	1.08333		2	1.33333	1.83333
1851	Female	Grade 5	10	No	2.08	3.18	3.25	3.55	1.91	3.08	2.25	2.88	2.6	2.84211	1.16667	1.9	1.2	1.16667	1.83333
1852	Female	Grade 5	10	No										3.47368	1.08333	1.6	3.8	1.16667	2.16667
1853	Female	Grade 5	10	No	3	2.73	2.42	2.55	3.36	3.42	2.5	4.63	4	2.68421	1.33333	1.7		1.5	2.33333
1854	Female	Grade 5	10	No	2.33	2.82	3.33	2.45	4.09	2.17	2.33	4.5	4.9	2.47368	1.58333	1.7	1.4	1.83333	2.33333
1855	Female	Grade 5	10	No	2.42	2.73	2.58	2.36	4	3.17	2.58	4.5	4.5	3.52632	1.33333	1.5		1.5	1.5
1856	Female	Grade 5	11	No	3.5	2.91	3.17	3.55	3.82	2.58	3.5	4.25	4.2	1.84211		1.8		1.83333	1.5
1857	Male	Grade 5	9	No	2.92	3.36	2.75	2.36	3.36	2.83	2.25	4.5	3.6	2.78947		2.2		2.33333	3.5
1858	Male	Grade 5	11	No	3.75	3.36	3.17	3.36	3	3	2.75	4.38	3.5	2.89474	1.83333	2.5		2.16667	2.5
1859	Male	Grade 5	10	No	2.25	3.18	3.17	3.64	3.27	3.25	3.83	3.75	2.8	2.21053	1.75	3.2	1.8	2.33333	2.5
1860	Male	Grade 5	10	No	2.92	3.09	3.58	3.27	2.91	2.83	2.58	3.75	4.1	2.21053	2.33333	3		3.16667	3
1861	Male	Grade 5	10	No	2.17	2.55	3.83	2.64	2.45	2.75	1.92	4.13	5.6	2.73684	1.66667	2.3		1.83333	2.5
1862	Male	Grade 5	10	No	3.17	2.36	3.5	2.73	2.45	3.58	3.67	4.88	4.3	2.21053	1.41667	1.9		1.5	1.66667
1863	Male	Grade 5	10	No	3.67	3.27	3.5	3.64	3.18	3.5	2.92	4.63	4.5	2.21053	2.33333	1.7	1.6	1.5	1.83333
1864	Male	Grade 5	10	No	3.5	3.55	3.67	3.18	4.27	3.5	3.58	3.63	3.8	3.57895	1.16667	1.9		1.33333	1.33333
1865	Male	Grade 5	11	No	1.92	2.36	2.67	3.36	3.45	2.92	2.25	5.38	2.4	2.84211	2.5	2.9		2.83333	3.33333
1866	Male	Grade 5	10	No	3.75	3.91	3.25	3.09	3.27	3.67	3.83	3.13	3	2.10526	1.5	1.6	2	1.16667	1.5
1867	Male	Grade 5	10	No	3.83	3.36	3.83	3.82	3.09	3.25	3.25	3.38	3.2	3.31579	2.41667	2.9	1.6	2.33333	3.16667
1868	Male	Grade 5	10	No	2.33	2.91	2	2.73	3.45	1.83	1.5	5.25	3.6	3.05263	1	1.4		1.5	1.5
1869	Male	Grade 5	10	No	3	3.18	3.92	3.55	3.64	3.33	3.5	4.25	4.2	2.47368	1.5	1.5	2.8	1.5	2.33333
1870	Male	Grade 5	10	No	2.92	3	3.08	2.55	3.64	2.42	2.67	4	4.3	2.36842	2.91667	2.2	1.8	3.16667	3.33333
1871	Male	Grade 5	10	No	2.5	2.73	3.08	2.27	2.45	1.42	1.67	4.38	3.6	2.68421	1.41667	1.7		1.33333	1.83333
1872	Male	Grade 5	10	No	3.5	3.91	3.17	3.64	3.64	3.17	3.42	3.38	3.9	3.15789	1	1.5	1	1	2
1873	Male	Grade 5	10	No	3.17	3.36	3.25	3.18	2.82	3.83	3.17	3.88	3	2.36842	1	1.8	1.4	1.5	1.66667
1874	Male	Grade 5	10	No	3.75	4.36	3.25	3.55	3.55	3	3.25	4.25	2.9	2.47368	1.66667	2	3	1.83333	3
1875	Male	Grade 5	10	No	1.25	1.91	2	1.82	1.91	1.5	1	4	2.4	2.68421	1.16667	2.2	1	1.16667	1.66667
1876	Male	Grade 5	10	No	1.75	2.73	3.25	3	2.18	2.25	2.42	4.13	2.6	2.57895	1.33333	2.5		1.5	2.83333
1877	Male	Grade 5	10	No	2.42	2.45	4.33	3	3.27	2.92	2.08	4.75	3.8	2.84211	1.41667	1.8	3	1.66667	2.5
1878	Male	Grade 5	10	No	1.5	1.55	2.5	1.91	1.55	2.08	1.08	5.25	3.3	3.10526	1.41667	2.6	2	1	3
1879	Male	Grade 5	11	No	1.58	3.18	3.42	2.09	1.82	2.75	2.33	3.88	2.3	2.36842	1.41667	1.8	2.4	1.16667	2.5
1880	Male	Grade 5	10	No	3.25	2.27	1.83	3.91	2.91	1.5	1.67	4.5	3.8	3.15789	1.5	2		1.16667
1881	Male	Grade 5	10	No	2.75	2.64	2.75	4.18	2.82	3.25	2.17	3.63	4	2.89474	2.25	2.9		3	3.16667
1882	Male	Grade 5	10	No	2.67	3.73	3.25	2.82	3	3.25	4.42	4.63	4.3	3.31579	1.33333	2		1.33333	2.33333
1883	Female	Grade 5	10	No	2.58	3	3.33	2.27	3	2.5	2	4	2.5	2.94737	1	1.6	2.4	1	1.5
1884	Female	Grade 5	10	No	2.75	2.36	2.67	2.18	2.09	1.83	2.42	4.63	3.3	2.57895	1.25		2	1.16667	2
1885	Female	Grade 5	10	No	2.67	3.18	3.17	2.82	3.45	3.25	2.08	4.75	3.1	3.63158	1.08333	2.1	3.4	1	2.16667
1886	Female	Grade 5	10	No	3.42	3.36	3	3.09	3.73	2.92	2.75	4.38	3.9	1.94737	1.5	1.6	1.2	1.16667	1.83333
1887	Female	Grade 5	10	No	3.42	3.36	3.92	3.91	3.91	2.92	4.08	3.13	3.3	3	1.66667	1.4		1.5	1.5
1888	Female	Grade 5	10	No	2.33	3.09	2.75	2.73	2.82	2.83	2.92	4.63	4.2	2.73684	1	2.2	2	1	1.83333
1889	Female	Grade 5	10	No	2.33	2.18	3.25	2.82	3.36	2.83	1.75	4.25	4.9	3.10526	1.25	1.5	1.2	1.16667	1.33333
1890	Female	Grade 5	10	No	1.83	2.91	2.83	1.82	1.91	2.83	2.25	5	4.1	3.57895	1.33333	2.7		1.16667	2.16667
1891	Female	Grade 5	10	No	3	2.64	3.08	3.36	2.18	3.25	2.58	4.13	3	2.21053	1.25	1.8		1.5	2.16667
1892	Female	Grade 5	10	No	2.67	3.09	2.92	2.82	2.45	2.58	2.42	4.13	3.7	2.36842	1.91667	2.3		2.66667	2.5
1893	Female	Grade 5	10	No	2.5	4	3.42	3	2.55	2.25	2.92	4.13	3.1			2.4	1.4	1.66667	3.33333
1894	Female	Grade 5	10	No	2.25	2.45	4.08	3.18	2.45	3	2.75	3.75	4.1	2.42105	1.5	1.7	2.2	2.16667	1.83333
1895	Female	Grade 5	10	No	2.17	3.36	3.42	3.55	1.73	2.92	2.5	3.63	1.8	2.10526	1.41667	1.6	1.4	1.33333	2.16667
1896	Female	Grade 5	11	No	2.67	3.18	3.17	3	3.36	3.58	2.92	3.13	3.6	3.05263	1.16667	1.7	1	1.5	2.16667
1897	Female	Grade 5	10	No	3.33	3	2.67	2.64	3.91	2.42	2.92	4.25	4	3.52632	1.16667	2.3		1.5	1.66667
1898	Female	Grade 5	10	No	1.75	3.27	3.92	2.64	1.27	3.75	2.42	2.5	2.5	2.05263	1.41667	1.5		2	2.33333
1899	Female	Grade 5	11	No	2.08	2.18	2.83	2.64	1.91	2.17	1.58	4	3.4	3.21053	2.25	2.5	1.6	1.33333	2.5
1900	Female	Grade 5	10	No	2.08	3	2.83	3	3.18	1.75	2.58	5	3.9	2.94737	1.08333	2.3	2	1.16667	1.66667
1901	Female	Grade 5	10	No	2.67	3.36	3	3.91	1.91	3.33	1.83	3.13	1.6	2.31579	2.58333	1.2	1.4	1.33333	1.16667
1902	Female	Grade 5	10	No	3.83	2.82	4.25	3.18	4.27	2.25	2.5	4.63	5.2	1.78947	2.16667	1.5	1.2	1.5	2
1903	Female	Grade 5	11	No	2.92	3.55	3.5	3.27	3.18	3.08	3.25	3.88	3.5	2.47368	3.41667	2		1.83333	2.83333
1904	Female	Grade 5	10	No	2.5	3	3.5	2.36	2.82	2.17	2.42	3.75	3.2	3	1	1.8	1.4	1	1.16667
1905	Female	Grade 5	10	No	2.75	2.82	3.83	2.45	3.18	2.67	2.58	3.75	3.7	2.73684	1.5	1.8		1.66667	2.16667
1906	Female	Grade 5	10	No	2.33	2.45	3.75	2.73	3.18	1.92	1.75	3.13	3.7	2.89474	1.16667	1.6		1	2.33333
1907	Female	Grade 5	9	No	4.08	2.91	1.33	2.73	4	2.58	1.67	4.13	4.2	3.26316		1.9		1	2
1908	Female	Grade 5	10	No	3.75	3.18	2.42	2.82	3.36	2	3.33	4.38	3.8	2.42105	1.16667	1.9	1	1.83333	1.66667
1909	Male	Grade 4	9	No	2.75	2.55	4	3	1.55	2.42	1.83	3.38	1.9		2.08333	2.9	2.4	2.16667	2.33333
1910	Male	Grade 4	11	No	3.17	2.55	3.75	2.55	2.73	3.08	2	3.13	2.6	2.68421		2.1	2.4	1.16667	2.33333
1911	Male	Grade 4	9	No	4.33	4.09	1.92	3.36	3.73	2.58	3.5	5.38	3.8		1.66667	2.3	2.2		2.33333
1912	Male	Grade 4	9	No	3.33	3.64	3.5	3.27	3.36	3.08	3.42	3.25	4				2.2	1.16667	2.16667
1913	Male	Grade 4	10	No	3.58	3.36	2.92	2.55	3.73	2.75	2.5	3.88	2.8				1.8		2.83333
1914	Male	Grade 4	9	No	3.42	3.09	3.42	2.91	4.09	2.92	3.33	4.75	3.7	2.26316		2.1		2	2.5
1915	Male	Grade 4	9	No	3.75	3.18	2.33	3.09	3.73	2.92	2.67	4.75	4	2.94737	2.41667	1.7		2	2.83333
1916	Male	Grade 4	9	No	2.5	2.27	4.08	2	2.45	2.42	1.92	3.75	3.6		1.08333	1.3		1.16667	2.16667
1917	Male	Grade 4	9	No	3.75	3.91	4	3.27	3.82	3.17	2	3.63	3.9					2	3.33333
1918	Male	Grade 4	10	No	3.17	3.09	3.33	4.09	2.91	3.33	3.17	2.88	1.6			1.8	2.6		1.33333
1919	Male	Grade 4	10	No	3.58	4	3.25	3.45	3.64	3.75	2.92	4.38	3.7	1.94737	3.5	2.6		4	2.5
1920	Male	Grade 4	9	No	4	3.45	2.58	3.36	3.73	3	3.83	3.75	3.2	2.10526	1.75	2		2	2.16667
1921	Male	Grade 4	9	No	2.58	3.18	4.33	3.36	2.27	3.58	3.33	3.25	2.6		2.58333		2.4	3	2.83333
1922	Male	Grade 4	9	No	3.17	3.36	3.08	3.18	3.91	3.17	3.17	3.63	3.3	3.68421	1.16667	2.2	1.6	1	2.33333
1923	Male	Grade 4	9	No	2.75	3.18	3.67	2.09	3	2.33	1.75	3.88	3.4		1	1.7	3.4	1	2.16667
1924	Male	Grade 4	10	No	3.58	4.09	3.92	3.82	3.55	3.67	3.58	2.75	3.4		1.83333	2.1	2.4	1.5	2
1925	Male	Grade 4	10	No	2.92	3	2.33	2.45	1.82	2.92	2.5	4.25	3
1926	Male	Grade 4	9	No	3.42	4.18	3.75	3.09	2.82	3.25	3.67	4.5	3.6	3.26316	1.25	2.1	1.8	1.5	2.33333
1927	Male	Grade 4	9	No	3.5	2.36	3.33	2.09	3.82	2.33	2.83	5	4.1	2.47368	1.25	1.9	2.2	1.83333	2.83333
1928	Male	Grade 4	9	No	3.75	3.45	3.33	3.18	3.73	3.08	3.25	4.13	3.8	3.26316	1.08333	2.1	1.4	1.5	3
1929	Male	Grade 4	9	No	2.92	3.09	3.17	3.18	3	3.25	2.58	4.25	3.8	2.47368	1.41667	2.3		1.83333	2.5
1930	Male	Grade 4	9	No	3.42	3.45	3.42	3.82	3	3.42	3.33	3.38	2.5	2.15789	2.75			2.83333	2.5
1931	Male	Grade 4	9	No	4.25	3.36	2.5	2.82	4.55	2.42	3.17	4	4.6		2.08333	2.4		2.66667
1932	Male	Grade 4	10	No															2.16667
1933	Male	Grade 4	10	No	3.08	3.18	2.33	2.09	4.73	2.25	2.42	3.75	4	3	1.25	2.2	1.8	1.33333	1.83333
1934	Male	Grade 4	9	No	4	2.82	3.08	4	3.09	3.58	3.75	3.63	4.5	2.52632	2.66667	2.3		2.5	3.33333
1935	Male	Grade 4	9	No	3.42	3.09	2.42	3.82	2.64	1.92	2.83	4.13	3.6	3.63158			3.2	1.5	3.33333
1936	Male	Grade 4	9	No	3.42	3.91	3.33	3.36	3.91	3	3.17	3.75	3.2	3.31579	2				2.83333
1937	Male	Grade 4	9	No	1.75	3.45	3.58	2.55	3.18	2.92	2.58	2.25	3.1			2.2	2.4	1.16667	2.33333
1938	Female	Grade 4	9	No	2.33	3.27	3.42	2.55	2.64	1.83	2.17	3.5	2.6	2.73684	1.33333	1.7	1.8	1.16667	1.83333
1939	Female	Grade 4	9	No	3.17	3.82	3.67	3	2.91	3.75	3.92	3	2.7			2.3		1.5	2.66667
1940	Female	Grade 4	9	No	3	2.55	3.75	2.18	2.27	2.83	1.67	5.38	3.9	2.68421	1.25	2.4	2.8	2.66667	3.5
1941	Female	Grade 4	8	No	3.5	3.36	2.33	2.64	4.09	2.58	2.17	4.5	4.2	3.31579					2
1942	Female	Grade 4	9	No	1.83	3.45	3.08	1.82	3.18	2.08	1.83	4.75	4.3	3	1.25	2.1	1.2	1	3
1943	Female	Grade 4	9	No	2.33	2.36	3.17	2.18	1.91	1.75	1.58	4.13	4		1.08333	1.6		1	2.5
1944	Female	Grade 4	9	No	2.17	3.91	2.58	2.36	2.55	2.58	1.92	3.75	3.3		2.75	1.5		1.83333	3.5
1945	Female	Grade 4	9	No	2	2	2.58	2.09	2	2.25	1.58	4.88	2.8	3.26316	1.16667	2.9	2.6	1.66667	3.16667
1946	Female	Grade 4	9	No	1.75	3.45	3.58	2.73	3.18	2.92	2.92	2.25	2.9	2.84211	1.08333		1.2	1.16667	1.5
1947	Female	Grade 4	9	No	2.67	3.73	2.33	1.91	2.91	3.92	2.25	4.5	3.8	2.94737	1.5	2.2	2.6	1.5	2.33333
1948	Female	Grade 4	9	No	2.42	3.27	3.08	2	3	2.17	1.67	3.88	3.6	2.73684	2.58333	2.1		1.33333	2.16667
1949	Female	Grade 4	8	No	3.67	3.73	4.42	4.18	2.55	3.33	3.17	3.75	2.2
1950	Female	Grade 4	9	No	3.42	3.18	3.33	4.09	3	3.75	3.17	3.25	2.8		1.08333		2.4	1	2.5
1951	Female	Grade 4	9	No	2.83	3	2.92	3	2.82	3.08	2.67	2.88	1.9	2.10526	2.33333	1.9		1.66667	2.5
1952	Female	Grade 4	9	No	2.5	2.09	3.5	2.18	3.27	2.67	1.83	4.25	3.4	2.68421		2	2.2	1.5	2.66667
1953	Female	Grade 4	9	No	2.33	2.45	3.42	3.45	2.91	2.58	3.25	4	3.6					1.83333	1.83333
1954	Female	Grade 4	9	No	3.42	2.55	2.42	2.45	3.18	2.42	1.92	4	3.1	2.42105	2	2.1	1	1.83333
1955	Female	Grade 4	9	No	4.17	3.55	4.92	3.82	4.45	4.25	5.42	4	3.2		2.58333	2.2		1.83333	2.5
1956	Female	Grade 4	10	No	3.33	3	3.17	3.55	3.18	4	3.75	3.25	3.3	2.94737		2	3	1.16667	1.66667
1957	Female	Grade 4	9	No	2.5	2.64	3.58	2.27	2.09	2.33	2.5	4.75	3.3	3.15789	1.25	1.8		1.33333	2.83333
1958	Female	Grade 4	9	No	2	2	2.58	2.09	2	2.08	1.58	4.88	2.8	2.94737	1.83333	2.6	3	1.16667	2
1959	Female	Grade 4	10	No										2.68421	1.83333	2.2		1.33333	2.5
1960	Female	Grade 4	9	No	2.5	3.82	4.67	3.27	2.27	3.17	2.92	4.13	3.4	1.94737	2.41667	2.6	1.8	3	2.5
1961	Female	Grade 4	9	No	1.92	2	2.17	1.82	3.64	3.25	1.75	2.25	4.4		1.25	1.9	1.2	1	1.16667
1962	Female	Grade 4	8	No	3.5	3.55	3.75	3.09	4.36	3.5	3.33	3.75	3.7	2.52632	2.16667	1.8	2.2	1.83333	2.66667
1963	Female	Grade 4	9	No	4	2.91	2.75	2.64	3.64	3.08	3	4.25	3.2	2.73684			3.4	1.33333	2.66667
1964	Female	Grade 4	9	No	3.58	2.73	3.25	2.45	3.64	1.75	2.75	4.13	4.1	2.78947	1	1.7	2.4	1.33333	1.5
1965	Male	Grade 4	9	No	4.25	3.64	3.5	3.09	2.36	2.92	3.17	5	2.4	3.21053	2.75	2.8		2.83333	3.5
1966	Male	Grade 4	9	No	2.42	2.18	3.17	2.36	3.27	2.33	2.25	3.63	3.6	2.68421	1.08333	1.9		1.16667	1.16667
1967	Male	Grade 4	9	No	3.17	3.73	2.92	2.64	4.36	3.08	2.58	3.63	3.7					1	2.33333
1968	Male	Grade 4	9	No	4.92	3.64	3.92	3.64	4.64	2.75	1.83	4.63	3.6	2.89474	1.08333	1.6	2		1.66667
1969	Male	Grade 4	9	No	3.75	3.64	2.75	3.09	3.73	3.33	3.42	4.25	3.8	2.78947	1.33333	1.6	2.2	1.83333	1.83333
1970	Male	Grade 4	9	No	3.08	3.18	3.17	4.09	2.45	3.08	3.17	2.63	2.2	3.15789	1.08333	1.9		1	2.5
1971	Male	Grade 4	9	No	3.58	3	2.83	3.55	3.18	2.83	3.42	4.5	3.2		2.16667	2	2	1.16667	2.66667
1972	Male	Grade 4	9	No	3.5	3.36	4.58	3.18	4.45	3.83	3.67	4.63	3.7	2.94737	1.25	2.4	2.2	2	2.5
1973	Male	Grade 4	8	No	2.75	3.55	2.58	3.18	3.55	2.67	2.17	3.88	3.5	3.21053		3	3	1	2.5
1974	Male	Grade 4	9	No	4.17	4.27	4.5	2.82	3.09	3.08	3.67	4.63	3.8	3.21053	1	2.8		1	2.5
1975	Male	Grade 4	9	No	2.5	2.73	2.5	2	2.82	3	2	3.38	2.9	3.21053		2	2.2	1.16667	1.66667
1976	Male	Grade 4	9	No	2.92	2.45	3.42	2.27	3	2.75	2	4.88	3.3		1.25	2.6		1.5	1.5
1977	Male	Grade 4	9	No	2.67	3.36	3.08	2.36	2.73	2.67	2.33	4	3.2				1.6
1978	Male	Grade 4	9	No	4.17	2.73	3.75	2.55	2.55	2.92	2.17	4.5	3.4	2.73684	1.33333	2.2		1.16667	1.5
1979	Male	Grade 4	9	No	2.67	2.82	3.67	3.18	2.82	3.17	3.5	4.63	3					2.5
1980	Male	Grade 4	9	No	4.58	3.64	2.75	2.91	3.64	3.17	3.5	4.13	1.8	3.36842	1			1.16667	1.83333
1981	Male	Grade 4	9	No	3.92	4.09	3.58	3.64	3.45	3.5	4.25	4.63	3.6	2.15789	2.16667	2.1	2	2	2.5
1982	Male	Grade 4	9	No	1.75	2.27	3.83	1.45	3.18	1.58	1.17	3.88	3.2	2.36842	1.33333	1.3	1.6	1.33333	1.5
1983	Male	Grade 4	9	No	3.33	3.27	3	2.45	3.18	3.17	2.33	3.75	3.3	3	1.83333	1.8	3.4	2.16667	3
1984	Male	Grade 4	10	No	3.42	2.64	4.67	3.18	4.09	3.42	2.33	5	4.5	2.26316	1.5	2.1			2.16667
1985	Male	Grade 4	9	No	3.83	3.55	3	3.09	3.73	2.83	3.25	4.38	3.9	3		2.4	2.8		3.16667
1986	Male	Grade 4	9	No	3.92	4.18	3.92	3.45	4	3.42	3.75	4.63	4.3	2.31579		2.1	2.6	1.33333	2.33333
1987	Male	Grade 4	9	No	2.5	3.55	3	3	1.45	3.5	2.08	5.13	3.7	2.36842	2.25	2.6	1.4	1.83333	1.83333
1988	Male	Grade 4	9	No	3	3.55	3.08	2.73	1.91	2.83	2.75	3.75	2.8	1.73684	2.08333	1.9	2.2	2.5	2
1989	Male	Grade 4	9	No	2.5	2.55	2.25	1.64	2.09	1.75	3.17	4	3.2	2.73684	1.75	1.8		2.16667	2
1990	Female	Grade 4	9	No	4.83	4	2.67	3.64	5.09	2.92	3.67	4.88	4.1		1.83333	2.2	1	1.16667	1.66667
1991	Female	Grade 4	9	No	2.33	3	3.67	2.45	2.09	2.33	1.83	4.38	3.9	2.42105	1.08333		2.2	1
1992	Female	Grade 4	9	No	1.75	2.45	4	3.64	1.45	3.58	1.58	3.63	2.7	2.15789	1.41667	1.6	1.2	1.5	2
1993	Female	Grade 4	9	No	1.67	2.55	3.58	2.36	1.82	2.42	2.25	2.38	1.7	2.10526	1	1.3		1.33333	1.16667
1994	Female	Grade 4	8	No	3.25	3.45	3.5	3.64	3.09	3.92	3.25	3.63	3	1.84211	1.41667	1.7	2.4	1.5	2.33333
1995	Female	Grade 4	9	No	2.83	2.18	5.25	3.45	2.91	2.83	1.92	3.38	2.9	2.68421	1.08333			1	2.5
1996	Female	Grade 4	10	No	2.17	2.91	2.67	2.18	3.82	2.58	2.5	5.75	5	2.47368	1.25	1.5	2.2	1.5	2.33333
1997	Female	Grade 4	9	No	1.92	2	2.08	1.09	2.82	1.08	1	4.63	4	3.52632	1.16667	1.9		1.16667	2
1998	Female	Grade 4	9	No	2.08	3.36	2.75	2.73	3.45	2.5	2.5	4.63	4.3	3.15789	1.25	1.7	2.2	1.33333	2.5
1999	Female	Grade 4	9	No	3.08	3.36	3.42	3.73	2.45	2.5	3.58	4.25	3.9	3.10526	1.66667	1.8	1.6	1.16667
[truncated: 851 more rows]
